# Supplementary material
Source: publisher figshare collection journal article supplement (https://tandf.figshare.com/articles/dataset/_/21193882)
Supplement: Supplementary file 1 [file 2]

## Supplementary information

### The status of arboreta in South Africa and the taxa they contain

MD Cheek, JRU Wilson, DM Richardson and Ş Procheş

*Southern Forests: A Journal of Forest Science* 2022, 84(2): 01–18.

<https://doi.org/10.2989/20702620.2022.2102453>

**Table S1:** Specimens examined, housed at KwaZulu-Natal herbarium (NH), Compton Herbarium (NBG), National Herbarium (PRE), Geo Potts Herbarium (BLFU), Lowveld National Botanical Garden Herbarium (GLOW) and Skukuza Herbarium (KNP)

|                            |                                                                                                                                                                                                                                                                                                                                                                                                                                                                                                                                                                                              |
|----------------------------|----------------------------------------------------------------------------------------------------------------------------------------------------------------------------------------------------------------------------------------------------------------------------------------------------------------------------------------------------------------------------------------------------------------------------------------------------------------------------------------------------------------------------------------------------------------------------------------------|
| <i>Abies religiosa</i>     | South Africa. KWAZULU-NATAL: <b>3029 (Kokstad)</b> : Weza state forest, arboretum plot L5c, (-DA), 12 Feb. 1982, <i>Quicke 8</i> (PRE); EASTERN CAPE: <b>3226 (Fort Beaufort)</b> : Hogsback, AFC conifer compartment, close to Hogsback arboretum, (-DB), 14 Jan. 2013, <i>Cheek 1553</i> (NH).                                                                                                                                                                                                                                                                                             |
| <i>Abies amabilis</i>      | South Africa. LIMPOPO: <b>2329 (Tzaneen)</b> : Magoebaskloof, Cheerio Gardens, (-CC), 25 Mar. 2021, <i>Cheek 2885</i> (NH).                                                                                                                                                                                                                                                                                                                                                                                                                                                                  |
| <i>Acacia acuminata</i>    | South Africa. NORTH WEST: <b>2626 (Klerksdorp)</b> : Lichtenburg arboretum, (-AA), 13 Mar. 1913, <i>Robertson 287</i> (PRE); WESTERN CAPE: <b>3319 (Worcester)</b> : Robertson arboretum, (-DD), Sept. 1916, <i>Shea 2070</i> (PRE).                                                                                                                                                                                                                                                                                                                                                         |
| <i>Acacia binervata</i>    | South Africa. WESTERN CAPE: <b>3418 (Simons Town)</b> : Tokai main arboretum tree no. 1018, (-AB), Oct. 1962, <i>Poynton 12685</i> (PRE).                                                                                                                                                                                                                                                                                                                                                                                                                                                    |
| <i>Acacia erioloba</i>     | South Africa. GAUTENG: <b>2528 (Pretoria)</b> : Pretoria national botanic garden, (-CB), 26 Aug. 2021, <i>Cheek 3000</i> (NH).                                                                                                                                                                                                                                                                                                                                                                                                                                                               |
| <i>Acacia mangium</i>      | South Africa. LIMPOPO: <b>2329 (Pietersburg)</b> : Tzaneen, JDM Keet arboretum, (-CC), 14 Sept. 2014, <i>Cheek 2167</i> (NH).                                                                                                                                                                                                                                                                                                                                                                                                                                                                |
| <i>Acacia penninervis</i>  | South Africa. WESTERN CAPE: <b>3418 (Simons Town)</b> : Tokai main arboretum tree no. 829, (-AB), Oct. 1962, <i>Poynton 12656</i> (PRE).                                                                                                                                                                                                                                                                                                                                                                                                                                                     |
| <i>Acacia prominens</i>    | South Africa. LIMPOPO: <b>2229 (Waterpoort)</b> : Hanglip arboretum, (-DD), 1 Sept. 1977, <i>Staude 17707</i> (PRE).                                                                                                                                                                                                                                                                                                                                                                                                                                                                         |
| <i>Acacia saligna</i>      | South Africa. WESTERN CAPE: <b>3319 (Worcester)</b> : Robertson arboretum plot 95, (-DD), Sept. 1915, <i>Dale 1645</i> (PRE).                                                                                                                                                                                                                                                                                                                                                                                                                                                                |
| <i>Acacia visite</i>       | South Africa. FREE STATE: <b>2926 (Bloemfontein)</b> : Bloemfontein arboretum, (-AA), 8 Feb. 1925, <i>Potts 3903</i> (BLFU).                                                                                                                                                                                                                                                                                                                                                                                                                                                                 |
| <i>Acer buergerianum</i>   | South Africa. LIMPOPO: <b>2329 (Tzaneen)</b> : Magoebaskloof, Cheerio Gardens, (-CC), 25 Mar. 2021, <i>Cheek 2878</i> (NH); GAUTENG: <b>2528 (Pretoria)</b> : Pretoria, Irene Dairy Farm arboretum, (-CC), 21 Mar. 2021, <i>Cheek 2844</i> (NH); KWAZULU-NATAL: <b>2929 (Underberg)</b> : Nottingham Road, Clifton Preparatory School, (-BD), 24 Feb. 2022, <i>Cheek 3128</i> (NH); <b>2931 (Stanger)</b> : Mitchell Park, (-CC), 7 May 1984, <i>Adamson 46</i> (NH); EASTERN CAPE: <b>3226 (Fort Beaufort)</b> : Hogsback, Hogsback arboretum, (-DB), 17 Nov. 2014, <i>Cheek 2237</i> (NH). |
| <i>Acer griseum</i>        | South Africa. KWAZULU-NATAL: <b>2929 (Underberg)</b> : Himeville, Kenmo Lake arboretum, (-DA), 2 Mar. 2021, <i>Cheek 2772</i> (NH).                                                                                                                                                                                                                                                                                                                                                                                                                                                          |
| <i>Acer japonicum</i>      | South Africa. LIMPOPO: <b>2329 (Tzaneen)</b> : Magoebaskloof, Cheerio Gardens, (-CC), 25 Mar. 2021, <i>Cheek 2894</i> (NH).                                                                                                                                                                                                                                                                                                                                                                                                                                                                  |
| <i>Acer negundo</i>        | South Africa. LIMPOPO: <b>2329 (Tzaneen)</b> : Magoebaskloof, Cheerio Gardens, (-CC), 25 Mar. 2021, <i>Cheek 2879</i> (NH); GAUTENG: <b>2528 (Pretoria)</b> : Pretoria, Irene Dairy Farm arboretum, (-CC), 21 Mar. 2021, <i>Cheek 2845</i> (NH).                                                                                                                                                                                                                                                                                                                                             |
| <i>Acer palmatum</i>       | South Africa. LIMPOPO: <b>2329 (Pietersburg)</b> : Haenertsburg, Sequoia Stay Gardens, (-DD), 20 Sept. 2019, <i>Cheek 2670</i> (NH).                                                                                                                                                                                                                                                                                                                                                                                                                                                         |
| <i>Acer pseudoplatanus</i> | South Africa. GAUTENG: <b>2528 (Pretoria)</b> : Pretoria zoo, (-CA), 21 Sept. 1918, <i>Kotze 2646</i> (PRE); KWAZULU-NATAL: <b>2930 (Pietermaritzburg)</b> : Benvie Arboretum, (-AD), 30 Oct. 2015, <i>Nkuna 3</i> (NH).                                                                                                                                                                                                                                                                                                                                                                     |

|                                 |                                                                                                                                                                                                                                                                                                                                                                                                       |
|---------------------------------|-------------------------------------------------------------------------------------------------------------------------------------------------------------------------------------------------------------------------------------------------------------------------------------------------------------------------------------------------------------------------------------------------------|
| <i>Acrocarpus fraxinifolius</i> | South Africa. MPUMALANGA: <b>2530 (Lydenburg)</b> : Sabie, Bergvliet plantation, D.R. de Wet arboretum, (-BB), 13 Jul. 2014, <i>Cheek</i> 2050 (NH).                                                                                                                                                                                                                                                  |
| <i>Acer rubrum</i>              | South Africa. WESTERN CAPE: <b>3322 (Oudtshoorn)</b> : Karbonaatjieskraal arboretum, (-DC), 18 Feb. 1985, <i>Poynton</i> 19317 (PRE).                                                                                                                                                                                                                                                                 |
| <i>Adansonia digitata</i>       | South Africa. LIMPOPO: <b>2329 (Pietersburg)</b> : Louis Trichardt, Tree park, (-BB), 24 Mar. 2021, <i>Cheek</i> 2867 (NH).                                                                                                                                                                                                                                                                           |
| <i>Aesculus x carnea</i>        | KWAZULU-NATAL: <b>2929 (Underberg)</b> : Nottingham Road, Clifton Preparatory School, (-BD), 24 Feb. 2022, <i>Cheek</i> 3122 (NH).                                                                                                                                                                                                                                                                    |
| <i>Agathis australis</i>        | South Africa. WESTERN CAPE: <b>3322 (Oudtshoorn)</b> : Arboretum, Witfontein plantation, (-CD), 1 May 1975, <i>Poynton</i> 15580 (PRE).                                                                                                                                                                                                                                                               |
| <i>Agathis atropupurea</i>      | South Africa. KWAZULU-NATAL: <b>2832 (Mtubatuba)</b> : Kwambonambi forestry stations arboretum plot B14, (-AC), 15 Oct. 1992, <i>Glen</i> 3148 (PRE).                                                                                                                                                                                                                                                 |
| <i>Agathis robusta</i>          | South Africa. LIMPOPO: <b>2330 (Tzaneen)</b> : Tzaneen, JDM Keet arboretum, (-CA), 19 Sept. 2019, <i>Cheek</i> 2667 (PRE); MPUMALANGA: <b>2530 (Lydenburg)</b> : Sabie, Bergvliet plantation, D.R. de Wet arboretum, (-BB), 13 Jul. 2014, <i>Cheek</i> 2060 (NH); KWAZULU-NATAL: <b>2831 (Nkandla)</b> : Port Durnford, Kauri pine arboretum next to N2, (-DD), 14 Jan. 2020, <i>Cheek</i> 2752 (NH). |
| <i>Agathis microstachya</i>     | South Africa. KWAZULU-NATAL: <b>2832 (Mtubatuba)</b> : Kwambonambi arboretum, (-CA), 26 Apr. 1964, <i>Haigh</i> 2377 (PRE).                                                                                                                                                                                                                                                                           |
| <i>Agonis flexuosa</i>          | South Africa. WESTERN CAPE: <b>3418 (Simons Town)</b> : Cape Town, Tokai arboretum, close to Lister's tea room, (-AB), 22 Mar. 2018, <i>Cheek</i> 2709 (NH).                                                                                                                                                                                                                                          |
| <i>Ailanthus altissima</i>      | South Africa. GAUTENG: <b>2528 (Pretoria)</b> : Irene dairy farm, (-CC), 21 Mar. 2021, <i>Cheek</i> 2854 (NH).                                                                                                                                                                                                                                                                                        |
| <i>Afrocarpus falcatus</i>      | South Africa. GAUTENG: <b>2528 (Pretoria)</b> : Pretoria, Jan Cilliers Park, (-CC), 17 Mar. 2021, <i>Cheek</i> 2812 (NH); MPUMALANGA: <b>2530 (Lydenburg)</b> : Sabie, Bergvliet plantation, D.R. de Wet arboretum, (-BB), 9 Jul. 2014, <i>Cheek</i> 2036 (NH).                                                                                                                                       |
| <i>Ailanthus altissima</i>      | South Africa. GAUTENG: <b>2528 (Pretoria)</b> : Pretoria national zoo, (-CA), 1954, <i>De Winter</i> s.n. (PRE).                                                                                                                                                                                                                                                                                      |
| <i>Albizia lebbeck</i>          | South Africa. LIMPOPO: <b>2229 (Waterpoort)</b> : Hanglip arboretum plot 33, (-DD), 5 Jun. 1961, <i>Poynton</i> 11964 (PRE); KWAZULU-NATAL: <b>3030 (Port Shepstone)</b> : Uvongo, Skyline Arboretum, (-CD), 3 Mar. 2022, <i>Cheek</i> 3146 (NH).                                                                                                                                                     |
| <i>Aleurites moluccanus</i>     | South Africa. LIMPOPO: <b>2330 (Tzaneen)</b> : Louis Trichardt, Entabeni plantation, Hill 20 arboretum, (-AA), 12 Sept. 2014, <i>Cheek</i> 2141 (NH); 29 Jun. 2018, <i>Cheek</i> 2608 (PRE).                                                                                                                                                                                                          |
| <i>Allocasuarina littoralis</i> | South Africa. LIMPOPO: <b>2329 (Pietersburg)</b> : Tzaneen, Woodbush arboretum, (-CC), 14 Sept. 2014, <i>Cheek</i> 2166 (NH); WESTERN CAPE: <b>3418 (Simons Town)</b> : Tokai main arboretum, (-AB), Feb. 1954, <i>Van Rensburg</i> 11080 (PRE).                                                                                                                                                      |
| <i>Alluaudia procera</i>        | South Africa. NORTH WEST: <b>2527 (Rustenburg)</b> : Rustenburg, Sun City triangle palm garden, (-AC), 20 Mar. 2021, <i>Cheek</i> 2832 (NH).                                                                                                                                                                                                                                                          |
| <i>Alnus cordata</i>            | South Africa. MPUMALANGA: <b>2530 (Lydenburg)</b> : Belfast arboretum, (-CA), Apr. 1922, <i>Robertson</i> 4128 (PRE).                                                                                                                                                                                                                                                                                 |
| <i>Alnus glutinosa</i>          | South Africa. MPUMALANGA: <b>2530 (Lydenburg)</b> : Sabie, Bergvliet plantation, D.R. de Wet arboretum, (-BB), 9 Jul. 2014, <i>Cheek</i> 2034 (NH); WESTERN CAPE: <b>3318 (Cape Town)</b> : Paarl arboretum, (-DB), 23 Mar. 1994, <i>Boucher</i> 17 (NBG).                                                                                                                                            |
| <i>Alnus rubra</i>              | South Africa. LIMPOPO: <b>2329 (Pietersburg)</b> : Haenertsburg, Sequoia Stay Gardens, (-DD), 20 Sept. 2019, <i>Cheek</i> 2678 (PRE); KWAZULU-NATAL: <b>2929 (Underberg)</b> : Himeville, Kenmo Lake arboretum, (-DA), 2 Mar. 2021, <i>Cheek</i> 2780 (NH); WESTERN CAPE: <b>3318 (Cape Town)</b> : Cape Town, Leeuwenhof estate, 9 June 2021, (-CD), <i>Cheek</i> 2922 (NH).                         |
| <i>Alphitonia excelsa</i>       | South Africa. WESTERN CAPE: <b>3418 (Simons Town)</b> : Tokai plot 48, paddock, arboretum, (-AB), 12 Sept. 1968, <i>Morze</i> 2234 (PRE).                                                                                                                                                                                                                                                             |
| <i>Araucaria angustifolia</i>   | South Africa. GAUTENG: <b>2528 (Pretoria)</b> : Pretoria zoo, (-CA), Nov. 1954, <i>De Winter</i> 2137 (PRE).                                                                                                                                                                                                                                                                                          |
| <i>Araucaria columnaris</i>     | South Africa. GAUTENG: <b>2528 (Pretoria)</b> : Pretoria, Jan Cilliers park, (-CC), 17 Mar. 2021, <i>Cheek</i> 2814 (NH); WESTERN CAPE: <b>3418 (Simons Town)</b> : Tokai main arboretum compartment A7, (-AB), 24 Jun. 1921, <i>King</i> 3414 (PRE).                                                                                                                                                 |
| <i>Araucaria heterophylla</i>   | South Africa. KWAZULU-NATAL: <b>2832 (Mtubatuba)</b> : Kwambonambi arboretum, (-CA), 14 Jan. 2020, <i>Cheek</i> 2755                                                                                                                                                                                                                                                                                  |

|                                               |                                                                                                                                                                                                                                                                                                                                  |
|-----------------------------------------------|----------------------------------------------------------------------------------------------------------------------------------------------------------------------------------------------------------------------------------------------------------------------------------------------------------------------------------|
| <i>Arctostaphylos bicolor</i>                 | South Africa. FREE STATE: <b>2926 (Bloemfontein)</b> : Bloemfontein arboretum, (-AA), Aug. 1923, <i>Robertson 5911</i> (PRE).                                                                                                                                                                                                    |
| <i>Argania spinosa</i>                        | South Africa. WESTERN CAPE: <b>3418 (Simons Town)</b> : Tokai main arboretum, tree no. 852, (-AB), Oct. 1962, <i>Poynton 12702</i> (PRE).                                                                                                                                                                                        |
| <i>Artocarpus heterophyllus</i>               | KWAZULU-NATAL: <b>3030 (Port Shepstone)</b> : Uvongo, Skyline Arboretum, (-CD), 3 Mar. 2022, <i>Cheek 3139</i> (NH).                                                                                                                                                                                                             |
| <i>Azanza garckeana</i>                       | South Africa. GAUTENG: <b>2528 (Pretoria)</b> : Pretoria national botanic garden, (-CB), 27 Aug. 2021, <i>Cheek 3013</i> (NH).                                                                                                                                                                                                   |
| <i>Banksia integrifolia</i>                   | South Africa. WESTERN CAPE: <b>3418 (Simons Town)</b> : Cape Town, Tokai arboretum, (-AB), 22 Mar. 2018, <i>Cheek 2719</i> (NH).                                                                                                                                                                                                 |
| <i>Bauhinia galpinii</i>                      | South Africa. GAUTENG: <b>2528 (Pretoria)</b> : Pretoria, Springbok park, (-CA), 17 Mar. 2021, <i>Cheek 2796</i> (NH).                                                                                                                                                                                                           |
| <i>Berberis thunbergii</i> cv. 'Atropurpurea' | South Africa. KWAZULU-NATAL: <b>2929 (Underberg)</b> : Himeville, Kenmo Lake arboretum, (-DA), 2 Mar. 2021, <i>Cheek 2777</i> (NH).                                                                                                                                                                                              |
| <i>Betula nigra</i>                           | South Africa. KWAZULU-NATAL: <b>3029 (Kokstad)</b> : Weza For. Res. Arboretum plot K1, (-DA), 9 Feb. 1982, <i>Quicke 4</i> (PRE).                                                                                                                                                                                                |
| <i>Betula pendula</i>                         | South Africa. WESTERN CAPE: <b>3318 (Cape Town)</b> : Table Mountain, Nursery Ravine, (-CD), 27 May 2016, <i>Cheek 2563</i> (NBG); EASTERN CAPE: <b>3226 (Fort Beaufort)</b> : Hogsback, Hogsback arboretum, (-DB), 9 Feb. 2016, <i>Cheek 2512</i> (NH).                                                                         |
| <i>Bischofia javanica</i>                     | South Africa. LIMPOPO: <b>2330 (Tzaneen)</b> : Louis Trichardt, Entabeni plantation, Hill 20 arboretum, (-AA), 12 Sept. 2014, <i>Cheek 2138</i> (NH); 30 Jun. 2018, <i>Cheek 2609</i> (PRE). KWAZULU-NATAL: <b>2831 (Nkandla)</b> : Empangeni, Compt. D27, Port Durnford arboretum, (-DD), 13 Jun. 2013, <i>Cheek 1725</i> (NH). |
| <i>Bixa orellana</i>                          | South Africa. LIMPOPO: <b>2330 (Tzaneen)</b> : Tzaneen, JDM Keet arboretum, (-CA), 19 Sept. 2019, <i>Cheek 2663</i> (PRE).                                                                                                                                                                                                       |
| <i>Bougainvillea glabra</i>                   | South Africa. GAUTENG: <b>2528 (Pretoria)</b> : Pretoria national zoo, (-CA), 24 Aug. 2021, <i>Cheek 3116</i> (NH); WESTERN CAPE: <b>3318 (Cape Town)</b> : Leeuwenhof estate, (-CD), 9 June 2021, <i>Cheek 2923</i> (NH).                                                                                                       |
| <i>Bougainvillea peruviana</i>                | South Africa. KWAZULU-NATAL: <b>2931 (Stanger)</b> : Tongaat, Amanzimnyama Gardens, (-CA), 29 Jul. 2021, <i>Cheek 2967</i> (NH);                                                                                                                                                                                                 |
| <i>Bougainvillea x buttiana</i>               | WESTERN CAPE: <b>3318 (Cape Town)</b> : Leeuwenhof estate, (-CD), 9 June 2021, <i>Cheek 2927</i> (NH).                                                                                                                                                                                                                           |
| <i>Brachychiton acerifolius</i>               | South Africa. KWAZULU-NATAL: <b>2930 (Pietermaritzburg)</b> : Pinetown, Japanese Gardens, (-DD), 3 Dec. 2020, <i>Cheek 2971</i> (NH); <b>2931 (Stanger)</b> : Tongaat, Amanzimnyama Garden, (-CA), 25 Nov. 2021, <i>Cheek 3102</i> (NH).                                                                                         |
| <i>Brachychiton discolor</i>                  | South Africa. GAUTENG: <b>2528 (Pretoria)</b> : Pretoria zoo, Lowveld camp, (-CA), Nov. 1954, <i>De Winter 2139</i> (PRE); MPUMALANGA: <b>2430 (Pilgrim's Rest)</b> : Salique arboretum, (-DB), Oct. 1945, <i>Prinsloo 9857</i> (PRE).                                                                                           |
| <i>Brachychiton populneus</i>                 | South Africa. GAUTENG: <b>2528 (Pretoria)</b> : Pretoria, Irene Dairy Farm arboretum, (-CC), 21 Mar. 2021, <i>Cheek 2833</i> (NH); FREE STATE: <b>2926 (Bloemfontein)</b> : Bloemfontein, Happy Valley conservation area, (-AA), 30 Dec. 2019, <i>Cheek 2744</i> (NH).                                                           |
| <i>Brachylaena discolor</i>                   | South Africa. GAUTENG: <b>2528 (Pretoria)</b> : Pretoria national botanic garden, Arboretum section, (-CB), 26 Aug. 2021, <i>Cheek 2985</i> (NH); Pretoria, Springbok park, (-CA), 17 Mar. 2021, <i>Cheek 2897</i> (NH).                                                                                                         |
| <i>Bridelia cathartica</i>                    | South Africa. GAUTENG: <b>2528 (Pretoria)</b> : Pretoria national botanic garden, Arboretum section, (-CB), 26 Aug. 2021, <i>Cheek 3049</i> (NH).                                                                                                                                                                                |
| <i>Buckinghamia celsissima</i>                | EASTERN CAPE: <b>3326 (Grahamstown)</b> : Grahamstown botanic garden, (-BC), 15 June 2021, <i>Cheek 2943</i> (NH).                                                                                                                                                                                                               |
| <i>Buddleja salviifolia</i>                   | South Africa. GAUTENG: <b>2528 (Pretoria)</b> : Pretoria national botanic garden, (-CB), 25 Aug. 2021, <i>Cheek 2982</i> (NH); Austin Roberts Bird Sanctuary, (-CC), 27 Aug. 2021, <i>Cheek 3015</i> (NH).                                                                                                                       |
| <i>Buxus sempervirens</i>                     | South Africa. WESTERN CAPE: <b>3418 (Simons Town)</b> : Tokai main arboretum, (-AB), 1953, <i>Van Rensburg 11117</i> (PRE).                                                                                                                                                                                                      |

|                                                              |                                                                                                                                                                                                                                                                                                                                                                                                                                                                                                                   |
|--------------------------------------------------------------|-------------------------------------------------------------------------------------------------------------------------------------------------------------------------------------------------------------------------------------------------------------------------------------------------------------------------------------------------------------------------------------------------------------------------------------------------------------------------------------------------------------------|
| <i>Calliandra haematocephala</i>                             | South Africa. KWAZULU-NATAL: <b>2931 (Stanger)</b> : Tongaat, Amanzimnyama Gardens, (-CA), 29 Jul. 2021, <i>Cheek</i> 2968 (NH).                                                                                                                                                                                                                                                                                                                                                                                  |
| <i>Callistemon citrinus</i> cv. 'Endeavor'                   | South Africa. GAUTENG: <b>2528 (Pretoria)</b> : University of Pretoria, Hatfield campus, (-CC), 28 Aug. 2021, <i>Cheek</i> 3026 (NH).                                                                                                                                                                                                                                                                                                                                                                             |
| <i>Callistemon rigidus</i>                                   | South Africa. WESTERN CAPE: <b>3418 (Simons Town)</b> : Tokai main arboretum, (-AB), Oct. 1953, <i>Van Rensburg</i> 11004 (PRE).                                                                                                                                                                                                                                                                                                                                                                                  |
| <i>Callistemon salignus</i>                                  | South Africa. EASTERN CAPE: <b>3325 (Port Elizabeth)</b> : Port Elizabeth, Victoria Park, (-DC), 14 Jun. 2021, <i>Cheek</i> 2956 (NH).                                                                                                                                                                                                                                                                                                                                                                            |
| <i>Callistemon viminalis</i>                                 | South Africa. GAUTENG: <b>2528 (Pretoria)</b> : Pretoria national zoo, (-CA), 24 Aug. 2021, <i>Cheek</i> 2988 (NH).                                                                                                                                                                                                                                                                                                                                                                                               |
| <i>Callitris columellaris</i>                                | South Africa. LIMPOPO: <b>2329 (Pietersburg)</b> : Louis Trichardt, Hanglip arboretum, (-BB), 13 Sept. 2014, <i>Cheek</i> 2157 (NH); NORTH WEST: <b>2626 (Klerksdorp)</b> : Lichtenburg arboretum plot 16, (-AA), 1 Aug. 1961, <i>Poynton</i> 11999 (PRE); FREE STATE: <b>2926 (Bloemfontein)</b> : Bloemfontein, Happy Valley conservation area, (-AA), 30 Dec. 2019, <i>Cheek</i> 2746 (NH); WESTERN CAPE: <b>3323 (Willowmore)</b> : Keurbooms River arboretum plot 47, (-CD), n.d., <i>Lange</i> 13141 (PRE). |
| <i>Callitris endlicheri</i>                                  | South Africa. WESTERN CAPE: <b>3319 (Worcester)</b> : Robertson arboretum, (-DD), Apr. 1906, <i>Anon.</i> 1042 (PRE).                                                                                                                                                                                                                                                                                                                                                                                             |
| <i>Callitris preissii</i>                                    | South Africa. WESTERN CAPE: <b>3319 (Worcester)</b> : Robertson arboretum, (-DD), 7 Sept. 1906, <i>Kok</i> 1106 (PRE).                                                                                                                                                                                                                                                                                                                                                                                            |
| <i>Callitris rhomboidea</i>                                  | South Africa. GAUTENG: <b>2528 (Pretoria)</b> : Irene cemetery arboretum, (-CC), 2 Feb. 1913, <i>Robertson</i> 1213 (PRE); MPUMALANGA: <b>2530 (Lydenburg)</b> : Sabie, D.R. de Wet For. Res. Sta. arboretum, (-BB), 31 Jul. 1973, <i>Drummond</i> 63 (GLOW).                                                                                                                                                                                                                                                     |
| <i>Calodendron capense</i>                                   | South Africa. KWAZULU-NATAL: <b>2931 (Stanger)</b> : Tongaat, Amanzimnyama Garden, (-CA), 25 Nov. 2021, <i>Cheek</i> 3103 (NH).                                                                                                                                                                                                                                                                                                                                                                                   |
| <i>Camellia japonica</i>                                     | LIMPOPO: <b>2329 (Tzaneen)</b> : Magoebaskloof, Cheerio Gardens, (-CC), 25 Mar. 2021, <i>Cheek</i> 2896 (NH).                                                                                                                                                                                                                                                                                                                                                                                                     |
| <i>Carpinus betulus</i>                                      | South Africa. KWAZULU-NATAL: <b>2930 (Pietermaritzburg)</b> : Howick, Benvie arboretum, (-AD), 23 Nov. 2021, <i>Cheek</i> 3096 (NH).                                                                                                                                                                                                                                                                                                                                                                              |
| <i>Carya illinoensis</i>                                     | South Africa. MPUMALANGA: <b>2530 (Lydenburg)</b> : Belfast arboretum, (-CA), Apr. 1922, <i>Robertson</i> 4129 (PRE).                                                                                                                                                                                                                                                                                                                                                                                             |
| <i>Cassine peragua</i>                                       | South Africa. WESTERN CAPE: <b>3418 (Simons Town)</b> : Tokai arboretum, (-AB), 6 Oct. 1962, <i>Poynton</i> 12600 (PRE); EASTERN CAPE: <b>3326 (Grahamstown)</b> : Grahamstown botanic garden, (-BC), 15 June 2021, <i>Cheek</i> 2944 (NH).                                                                                                                                                                                                                                                                       |
| <i>Cassinopsis ilicifolia</i>                                | South Africa. GAUTENG: <b>2528 (Pretoria)</b> : Pretoria, Springbok park, (-CA), 17 Mar. 2021, <i>Cheek</i> 2795 (NH); Pretoria national botanic garden, (-CB), 26 Aug. 2021, <i>Cheek</i> 3004 (NH).                                                                                                                                                                                                                                                                                                             |
| <i>Castanea sativa</i>                                       | South Africa. GAUTENG: <b>2528 (Pretoria)</b> : Irene dairy farm, (-CC), 21 Mar. 2021, <i>Cheek</i> 2846 (NH); Pretoria zoo, (-CA), 1954, <i>De Winter s.n.</i> (PRE); MPUMALANGA: <b>2630 (Carolina)</b> : Jessievale arboretum, (-BA), 10 Dec. 1944, <i>Loock</i> 9978 (PRE).                                                                                                                                                                                                                                   |
| <i>Castanospermum australe</i>                               | South Africa. GAUTENG: <b>2528 (Pretoria)</b> : Pretoria zoo, (-CA), Nov. 1954, <i>De Winter</i> 2140 (PRE); KWAZULU-NATAL: <b>2930 (Pietermaritzburg)</b> : Pietermaritzburg, Msunduzi museum, (-CB), 23 Nov. 2021, <i>Cheek</i> 3093 (NH).                                                                                                                                                                                                                                                                      |
| <i>Casuarina cunninghamiana</i>                              | South Africa. LIMPOPO: <b>2330 (Messina)</b> : Louis Trichardt, Entabeni plantation, Lower arboretum, (-AA), 12 Sept. 2014, <i>Cheek</i> 2145 (NH). Louis Trichardt, Hanglip arboretum, (-BB), 13 Sept. 2014, <i>Cheek</i> 2152 (NH); GAUTENG: <b>2528 (Pretoria)</b> : Pretoria, Irene Dairy Farm arboretum, (-CC), 21 Mar. 2021, <i>Cheek</i> 2835 (NH).                                                                                                                                                        |
| <i>Casuarina cunninghamiana</i> subsp. <i>cunninghamiana</i> | South Africa. KWAZULU-NATAL: <b>2930 (Pietermaritzburg)</b> : Howick, Benvie arboretum, (-AD), 10 Sept. 2015, <i>Cheek</i> 2401 (NH).                                                                                                                                                                                                                                                                                                                                                                             |
| <i>Casuarina equisetifolia</i>                               | South Africa. KWAZULU-NATAL: <b>2832 (Mtubatuba)</b> : Dukuduku arboretum plot F, (-AC), 16 Apr. 1940, <i>Fischer</i> 210 (PRE); St. Lucia arboretum plot, (-AB), 21 Mar. 1964, <i>Haigh</i> 2364 (PRE); <b>2931 (Stanger)</b> : Tongaat, Amanzimnyama Garden, (-CA), 5 Aug. 2021, <i>Cheek</i> 3086 (NH).                                                                                                                                                                                                        |
| <i>Casuarina glauca</i>                                      | South Africa. KWAZULU-NATAL: <b>2832 (Mtubatuba)</b> : St. Lucia arboretum plot 1k, (-AB), 24 Mar. 1979, <i>Poynton</i> 15911 (PRE); WESTERN CAPE: <b>3418 (Simons Town)</b> : Tokai arboretum, Paddock arboretum plot A5c2 (-AB), Oct. 1962, <i>Poynton</i> 12550 (PRE).                                                                                                                                                                                                                                         |



|                                 |                                                                                                                                                                                                                                                                                                                                                                                                                                                                                                                                                                                                                                                                                                                                                                                                                                                                                                                                                                            |
|---------------------------------|----------------------------------------------------------------------------------------------------------------------------------------------------------------------------------------------------------------------------------------------------------------------------------------------------------------------------------------------------------------------------------------------------------------------------------------------------------------------------------------------------------------------------------------------------------------------------------------------------------------------------------------------------------------------------------------------------------------------------------------------------------------------------------------------------------------------------------------------------------------------------------------------------------------------------------------------------------------------------|
| <i>Casuarina torulosa</i>       | South Africa. WESTERN CAPE: <b>3418 (Simons Town)</b> : Tokai arboretum, (-AB), 8 Aug. 1962, Poynton 12604 (PRE).                                                                                                                                                                                                                                                                                                                                                                                                                                                                                                                                                                                                                                                                                                                                                                                                                                                          |
| <i>Catunaregam spinosa</i>      | South Africa. GAUTENG: <b>2628 (Johannesburg)</b> : Houghton, The Wilds, (-AA), 30 Nov. 1984, McMurtry 5641 (JBG).                                                                                                                                                                                                                                                                                                                                                                                                                                                                                                                                                                                                                                                                                                                                                                                                                                                         |
| <i>Cedrus deodara</i>           | South Africa. LIMPOPO: <b>2329 (Pietersburg)</b> : Tzaneen, Woodbush arboretum, (-DD), 14 Sept. 2014, <i>Cheek</i> 2165 (NH). MPUMALANGA: <b>2530 (Lydenburg)</b> : Belfast, Belfast arboretum, <i>Cheek</i> 2067 (NH). GAUTENG: <b>2528 (Pretoria)</b> : Pretoria, Irene Dairy Farm, (-CC), 21 Mar. 2021, <i>Cheek</i> 2841 (NH); FREE STATE: <b>2926 (Bloemfontein)</b> : Bloemfontein, Third Raadsaal, front garden, (-AA), 18 June 2021, <i>Cheek</i> 2959 (NH); KWAZULU-NATAL: <b>2929 (Underberg)</b> : Himeville, Kenmo Lake arboretum, (-DA), 2 Mar. 2021, <i>Cheek</i> 2784 (NH); <b>2930 (Pietermaritzburg)</b> : Howick, Benvie arboretum, (-AD), 29 Aug. 2015, <i>Cheek</i> 2399 (NH). EASTERN CAPE: <b>3227 (Stutterheim)</b> : Kubusie plantation, Evelyn Valley arboretum, (-CA), <i>Cheek</i> 1544 (NH); Evelyn Valley arboretum, (-CA), 12 Feb. 2016, <i>Cheek</i> 2479 (NH); Stutterheim, Fort Cunynghame, (-AD), 15 Nov. 2014, <i>Cheek</i> 2195, (NH). |
| <i>Cedrus libani</i>            | South Africa. MPUMALANGA: <b>2530 (Lydenburg)</b> : Belfast arboretum plot 21, (-CA), 2 May 1983, Anon. 17698 (PRE).                                                                                                                                                                                                                                                                                                                                                                                                                                                                                                                                                                                                                                                                                                                                                                                                                                                       |
| <i>Ceiba insignis</i>           | South Africa. GAUTENG: <b>2528 (Pretoria)</b> : University of Pretoria, Hatfield campus, (-CC), 28 Aug. 2021, <i>Cheek</i> 3047 (NH).                                                                                                                                                                                                                                                                                                                                                                                                                                                                                                                                                                                                                                                                                                                                                                                                                                      |
| <i>Celtis africana</i>          | South Africa. GAUTENG: <b>2528 (Pretoria)</b> : Pretoria, Springbok park, (-CA), 17 Mar. 2021, <i>Cheek</i> 2786 (NH); Pretoria, Irene Dairy Farm arboretum, (-CC), 21 Mar. 2021, <i>Cheek</i> 2849 (NH); University of Pretoria Hillcrest campus, (-CA), 28 Aug. 2021, <i>Cheek</i> 3069 (NH); <b>2931 (Stanger)</b> : Tongaat, Amanzimnyama Garden, (-CA), 25 Nov. 2021, <i>Cheek</i> 3104 (NH).                                                                                                                                                                                                                                                                                                                                                                                                                                                                                                                                                                         |
| <i>Celtis sinensis</i>          | South Africa. GAUTENG: <b>2528 (Pretoria)</b> : Pretoria, Irene Dairy Farm arboretum, (-CC), 21 Mar. 2021, <i>Cheek</i> 2850 (NH)                                                                                                                                                                                                                                                                                                                                                                                                                                                                                                                                                                                                                                                                                                                                                                                                                                          |
| <i>Cerasus campanulata</i>      | South Africa. LIMPOPO: <b>2329 (Pietersburg)</b> : Haenertsburg, Sequoia Stay Gardens, (-DD), 20 Sept. 2019, <i>Cheek</i> 2674 (PRE)                                                                                                                                                                                                                                                                                                                                                                                                                                                                                                                                                                                                                                                                                                                                                                                                                                       |
| <i>Ceratonia siliqua</i>        | South Africa. GAUTENG: <b>2528 (Pretoria)</b> : University of Pretoria, Hatfield campus, (-CC), 28 Aug. 2021, <i>Cheek</i> 3042 (NH); KWAZULU-NATAL: <b>2930 (Pietermaritzburg)</b> : Pietermaritzburg, Msunduzi museum, (-CB), 23 Nov. 2021, <i>Cheek</i> 3092 (NH).                                                                                                                                                                                                                                                                                                                                                                                                                                                                                                                                                                                                                                                                                                      |
| <i>Ceratopetalum gummiferum</i> | South Africa. WESTERN CAPE: <b>3418 (Simons Town)</b> : Tokai main arboretum, (-AB), 12 Sept. 1968, Van Rensburg 10853 (PRE).                                                                                                                                                                                                                                                                                                                                                                                                                                                                                                                                                                                                                                                                                                                                                                                                                                              |
| <i>Cercis siliquastrum</i>      | South Africa. FREE STATE: <b>2926 (Bloemfontein)</b> : Bloemfontein arboretum, (-AA), 5 Nov. 1924, Pretorius 3215 (BLFU); <b>2827 (Senekal)</b> : Senekal, NG church garden, (-BC), 16 May 2021, <i>Cheek</i> 2907 (NH).                                                                                                                                                                                                                                                                                                                                                                                                                                                                                                                                                                                                                                                                                                                                                   |
| <i>Chamaecyparis</i> sp.        | South Africa. WESTERN CAPE: <b>3318 (Cape Town)</b> : Table Mountain, Nursery Ravine, (-CD), 27 May 2016, <i>Cheek</i> 2560 (NBG).                                                                                                                                                                                                                                                                                                                                                                                                                                                                                                                                                                                                                                                                                                                                                                                                                                         |
| <i>Chamaecyparis lawsoniana</i> | South Africa. WESTERN CAPE: <b>3418 (Simons Town)</b> : Tokai main arboretum, (-AB), Oct. 1962, Poynton 12751 (PRE); EASTERN CAPE: <b>3227 (Stutterheim)</b> : Evelyn valley arboretum plot 7, (-CB), 20 Mar. 1982, Brown 16546 (PRE).                                                                                                                                                                                                                                                                                                                                                                                                                                                                                                                                                                                                                                                                                                                                     |
| <i>Chamaecyparis pisifera</i>   | South Africa. KWAZULU-NATAL: <b>2930 (Pietermaritzburg)</b> : Howick, Benvie arboretum, (-AD), 29 Aug. 2015, <i>Cheek</i> 2342 (NH).                                                                                                                                                                                                                                                                                                                                                                                                                                                                                                                                                                                                                                                                                                                                                                                                                                       |
| <i>Cinnamomum camphora</i>      | South Africa. GAUTENG: <b>2528 (Pretoria)</b> : Pretoria, Irene Dairy Farm arboretum, (-CC), 21 Mar. 2021, <i>Cheek</i> 2837 (NH); Irene Estate, Van der Bijl's farm, Arboretum, (-CC), 24 Nov. 1985, Germishuizen 3522 (PRE); KWAZULU-NATAL: <b>2930 (Pietermaritzburg)</b> : Pinetown, Japanese Gardens, (-DD), 3 Dec. 2020, <i>Cheek</i> 2972 (NH); WESTERN CAPE: <b>3323 (Willowmore)</b> : Uniondale road, Diepwalle arboretum, (-CC), 25 Jan. 2014, <i>Cheek</i> 1961 (NH); <b>3326 (Knysna)</b> : Alexandria, (-CB), Aug. 1952, Skott 10625 (PRE).                                                                                                                                                                                                                                                                                                                                                                                                                  |
| <i>Citharexylum spinosum</i>    | WESTERN CAPE: <b>3318 (Cape Town)</b> : Leeuwenhof estate, (-CD), 9 June 2021, <i>Cheek</i> 2928 (NH).                                                                                                                                                                                                                                                                                                                                                                                                                                                                                                                                                                                                                                                                                                                                                                                                                                                                     |
| <i>Citrus japonica</i>          | South Africa. FREE STATE: <b>2827 (Senekal)</b> : Senekal, NG church garden, (-BC), 16 May 2021, <i>Cheek</i> 2912 (NH).                                                                                                                                                                                                                                                                                                                                                                                                                                                                                                                                                                                                                                                                                                                                                                                                                                                   |
| <i>Citrus sinensis</i>          | South Africa. FREE STATE: <b>2926 (Bloemfontein)</b> : Bloemfontein, Third Raadsaal, inner courtyard, (-AA), 18 June 2021, <i>Cheek</i> 2965 (NH).                                                                                                                                                                                                                                                                                                                                                                                                                                                                                                                                                                                                                                                                                                                                                                                                                         |
| <i>Clerodendrum capense</i>     | South Africa. GAUTENG: <b>2528 (Pretoria)</b> : Pretoria, Springbok park, (-CA), 17 Mar. 2021, <i>Cheek</i> 2788 (NH). KWAZULU-NATAL: <b>2931 (Stanger)</b> : Tongaat, Amanzimnyama Garden, (-CA), 25 Nov. 2021, <i>Cheek</i> 3103 (NH).                                                                                                                                                                                                                                                                                                                                                                                                                                                                                                                                                                                                                                                                                                                                   |

|                                               |                                                                                                                                                                                                                                                                                                                                                                                              |
|-----------------------------------------------|----------------------------------------------------------------------------------------------------------------------------------------------------------------------------------------------------------------------------------------------------------------------------------------------------------------------------------------------------------------------------------------------|
| <i>Clitoria fairchildiana</i>                 | South Africa. KWAZULU-NATAL: <b>2931 (Stanger)</b> : Mitchell Park, (-CC), 8 Mar. 1984, <i>Nichols</i> 723 (NH).                                                                                                                                                                                                                                                                             |
| <i>Combretum erythrophyllum</i>               | South Africa. LIMPOPO: <b>2329 (Louis Trichardt)</b> : Louis Trichardt, Tree Park, (-BB), 24 Mar. 2021, <i>Cheek</i> 3075 (NH); GAUTENG: <b>2528 (Pretoria)</b> : Pretoria, Jan Cilliers park, (-CC), 17 Mar. 2021, <i>Cheek</i> 2811 (NH).                                                                                                                                                  |
| <i>Cordia sebestena</i>                       | KWAZULU-NATAL: <b>3030 (Port Shepstone)</b> : Uvongo, Skyline Arboretum, (-CD), 3 Mar. 2022, <i>Cheek</i> 3143 (NH).                                                                                                                                                                                                                                                                         |
| <i>Cordyline australis</i>                    | South Africa. KWAZULU-NATAL: <b>2931 (Stanger)</b> : Tongaat, Amanzimnyama Garden, (-CA), 14 Oct. 2021, <i>Cheek</i> 3078 (NH).                                                                                                                                                                                                                                                              |
| <i>Cornus florida</i>                         | South Africa. KWAZULU-NATAL: <b>2929 (Underberg)</b> : Himeville, Kenmo Lake arboretum, (-DA), 2 Mar. 2021, <i>Cheek</i> 2779 (NH).                                                                                                                                                                                                                                                          |
| <i>Cornus nuttallii</i>                       | South Africa. LIMPOPO: <b>2329 (Tzaneen)</b> : Magoebaskloof, Cheerio Gardens, (-CC), 25 Mar. 2021, <i>Cheek</i> 2886 (NH); KWAZULU-NATAL: <b>2929 (Underberg)</b> : Nottingham Road, Clifton Preparatory School, (-BD), 24 Feb. 2022, <i>Cheek</i> 3121 (NH).                                                                                                                               |
| <i>Corylus avellana</i>                       | WESTERN CAPE: <b>3318 (Cape Town)</b> : Paarl arboretum, (-DB), 12 May 1988, <i>Poynton</i> 20237 (PRE).                                                                                                                                                                                                                                                                                     |
| <i>Corymbia calophylla</i>                    | South Africa. WESTERN CAPE: <b>3418 (Simons Town)</b> : Tokai arboretum, (-AB), 20 Mar. 1940, <i>Luckhoff</i> 220 (PRE).                                                                                                                                                                                                                                                                     |
| <i>Corymbia eximia</i>                        | WESTERN CAPE: <b>3319 (Worcester)</b> : Kluitjieskraal arboretum, (-AC), 27 Jan. 1915, <i>Robertson</i> 1406 (PRE).                                                                                                                                                                                                                                                                          |
| <i>Corymbia ficifolia</i>                     | South Africa. WESTERN CAPE: <b>3322 (Oudtshoorn)</b> : George, Saasveld arboretum, (-DC), 24 Jan. 2014, <i>Cheek</i> 1953 (NH).                                                                                                                                                                                                                                                              |
| <i>Corymbia maculata</i>                      | EASTERN CAPE: <b>3326 (Grahamstown)</b> : Grahamstown botanic garden, (-BC), 15 June 2021, <i>Cheek</i> 2942 (NH).                                                                                                                                                                                                                                                                           |
| <i>Corymbia eximia</i>                        | South Africa. WESTERN CAPE: <b>3418 (Simons Town)</b> : Tokai arboretum plot 378, (-AB), 9 Aug. 1962, <i>Poynton</i> 12877 (PRE).                                                                                                                                                                                                                                                            |
| <i>Cotoneaster lacteus</i>                    | South Africa. LIMPOPO: <b>2329 (Tzaneen)</b> : Magoebaskloof, Cheerio Gardens, (-CC), 25 Mar. 2021, <i>Cheek</i> 2893 (NH).                                                                                                                                                                                                                                                                  |
| <i>Crataegus laevigata</i>                    | South Africa. EASTERN CAPE: <b>3226 (Fort Beaufort)</b> : Hogsback arboretum, (-DB), 22 Nov. 1967, <i>Kirkman</i> 3091 (PRE).                                                                                                                                                                                                                                                                |
| <i>Crataegus mexicana</i>                     | South Africa. EASTERN CAPE: <b>3226 (Fort Beaufort)</b> : Hogsback arboretum, (-DB), 22 Nov. 1967, <i>Kirkman</i> 3092 (PRE).                                                                                                                                                                                                                                                                |
| <i>Crataegus pubescens</i>                    | South Africa. GAUTENG: <b>2528 (Pretoria)</b> : Austin Roberts Bird Sanctuary, (-CC), 27 Aug. 2021, <i>Cheek</i> 3015 (NH); MPUMALANGA: <b>2530 (Lydenburg)</b> : Belfast arboretum, (-CA), 7 Apr. 1922, <i>Kotze</i> 4084 (PRE).                                                                                                                                                            |
| <i>Croton sylvaticus</i>                      | South Africa. GAUTENG: <b>2528 (Pretoria)</b> : Pretoria, Springbok park, (-CA), 17 Mar. 2021, <i>Cheek</i> 2799 (NH).                                                                                                                                                                                                                                                                       |
| <i>Cryptomeria japonica</i>                   | South Africa. MPUMALANGA: <b>2530 (Lydenburg)</b> : Sabie, Bergvliet plantation, D.R. de Wet arboretum, (-BB), 13 Jul. 2014, <i>Cheek</i> 2054 (NH); <b>2630 (Carolina)</b> : Ermelo, Chrissiesmeer, Jessievale arboretum, (-BB), 17 Jul. 2014, <i>Cheek</i> 2082 (NH). WESTERN CAPE: <b>3318 (Cape Town)</b> : Table Mountain, Nursery Ravine, (-CD), 27 May 2016, <i>Cheek</i> 2562 (NBG). |
| <i>Cunninghamia lanceolata</i>                | South Africa. WESTERN CAPE: <b>3418 (Simons Town)</b> : Tokai arboretum, (-AB), Dec. 1932, <i>Keet</i> 17346 (NBG).                                                                                                                                                                                                                                                                          |
| <i>Cupressus arizonica</i>                    | South Africa. GAUTENG: <b>2528 (Pretoria)</b> : Irene cemetery arboretum, (-CC), 4 Dec. 1962, <i>Poynton</i> 12692 (PRE); FREE STATE: <b>2827 (Senekal)</b> : Senekal, NG church garden, (-BC), 16 May 2021, <i>Cheek</i> 2913 (NH).                                                                                                                                                         |
| <i>Cupressus arizonica</i> var. <i>glabra</i> | South Africa. MPUMALANGA: <b>2530 (Lydenburg)</b> : Belfast arboretum plot 95, (-CA), 1 Nov. 1963, <i>Munro</i> 13948 (PRE); D.R. de Wet For. Res. Sta. arboretum, (-BB), 19 May 1973, <i>Drummond</i> 99 (GLOW).                                                                                                                                                                            |
| <i>Cupressus bakeri</i>                       | South Africa. LIMPOPO: <b>2329 (Pietersburg)</b> : Louis Trichardt, Hanglip arboretum, (-BB), 13 Sept. 2014, <i>Cheek</i> 2156 (NH).                                                                                                                                                                                                                                                         |

|                                                     |                                                                                                                                                                                                                                                                                                                                                                                                                                                                                                                                                                                                                                                                                                                                                                                                                                                                                                                                                                                                                                                                                                                                                                                                                                                                                                                                                                                                                                                                                                                                                                                                                                                                                                       |
|-----------------------------------------------------|-------------------------------------------------------------------------------------------------------------------------------------------------------------------------------------------------------------------------------------------------------------------------------------------------------------------------------------------------------------------------------------------------------------------------------------------------------------------------------------------------------------------------------------------------------------------------------------------------------------------------------------------------------------------------------------------------------------------------------------------------------------------------------------------------------------------------------------------------------------------------------------------------------------------------------------------------------------------------------------------------------------------------------------------------------------------------------------------------------------------------------------------------------------------------------------------------------------------------------------------------------------------------------------------------------------------------------------------------------------------------------------------------------------------------------------------------------------------------------------------------------------------------------------------------------------------------------------------------------------------------------------------------------------------------------------------------------|
| <i>Cupressus funebris</i>                           | South Africa. GAUTENG: <b>2528 (Pretoria)</b> : Irene cemetery arboretum, (-CC), 4 Dec. 1962, <i>Poynton</i> 12695 (PRE); Pretoria national zoo, (-), 24 Aug. 2021, <i>Cheek</i> 2989 (NH); University of Pretoria, Hillcrest campus, (-CB), 28 Aug. 2021, <i>Cheek</i> 3041 (NH); KWAZULU-NATAL: <b>2930 (Pietermaritzburg)</b> : Howick, Benvie arboretum, (-AD), 29 Oct. 2015, <i>Cheek</i> 2393 (NH); WESTERN CAPE: <b>3418 (Simons Town)</b> : Tokai main arboretum, (-AB), Oct. 1962, <i>Poynton</i> 12747 (PRE).                                                                                                                                                                                                                                                                                                                                                                                                                                                                                                                                                                                                                                                                                                                                                                                                                                                                                                                                                                                                                                                                                                                                                                               |
| <i>Cupressus goveniana</i>                          | South Africa. MPUMALANGA: <b>2530 (Lydenburg)</b> : Belfast arboretum plot 54, (-CA), 1 Nov. 1963, <i>Van Rensburg</i> 13961 (PRE); WESTERN CAPE: <b>3322 (Oudtshoorn)</b> : George arboretum, (-CB), 20 Oct. 1954, <i>Taylor</i> 1440 (PRE); WESTERN CAPE: <b>3418 (Simons Town)</b> : Tokai main arboretum, tree no. 1251 (-AB), Oct. 1962, <i>Poynton</i> 12596 (PRE).                                                                                                                                                                                                                                                                                                                                                                                                                                                                                                                                                                                                                                                                                                                                                                                                                                                                                                                                                                                                                                                                                                                                                                                                                                                                                                                             |
| <i>Cupressus guadalupensis</i> var. <i>forbesii</i> | South Africa. MPUMALANGA: <b>2530 (Lydenburg)</b> : Belfast arboretum plot 19, (-CA), 4 Nov. 1959, <i>Poynton</i> 11400 (PRE).                                                                                                                                                                                                                                                                                                                                                                                                                                                                                                                                                                                                                                                                                                                                                                                                                                                                                                                                                                                                                                                                                                                                                                                                                                                                                                                                                                                                                                                                                                                                                                        |
| <i>Cupressus lusitanica</i>                         | South Africa. FREE STATE: <b>2926 (Bloemfontein)</b> : Bloemfontein, Third Raadsaal, front garden, (-AA), 18 Jun. 2021, <i>Cheek</i> 2960 (NH); KWAZULU-NATAL: <b>2929 (Underberg)</b> : Kenmo Lake arboretum, (-DA), 15 Sept. 2021, <i>Cheek</i> 3059 (NH); <b>2930 (Pietermaritzburg)</b> : Pietermaritzburg, KZN botanical gardens, (-CB), 25 Aug. 2015, <i>Cheek</i> 2353 (NH); Benvie Gardens, (-AD), 13 Aug. 2015, <i>Cheek</i> 2346 (NH); <b>3029 (Kokstad)</b> : Kokstad, Weza plantation, Blackwater arboretum, (-DA), <i>Cheek</i> 2547 (NH); Weza state forest arboretum, (-DA), 11 Feb. 1982, <i>Quicke</i> 10 (PRE); WESTERN CAPE: <b>3318 (Cape Town)</b> : Table mountain, Nursery ravine, (-CD), 19 Jun. 2011, <i>Cheek</i> 955 (NH); Cape Town, Leeuwenhof estate, (-CD), 9 June 2021, <i>Cheek</i> 2919 (NH); <b>3418 (Simons Town)</b> : Cape Town, Tokai arboretum, arboretum entrance, (-AB), 22 Mar. 2018, <i>Cheek</i> 2714 (NH); Tokai main arboretum plot 330, (-AB), Oct. 1962, <i>Poynton</i> 12712 (PRE). <b>3322 (Oudtshoorn)</b> : Swartberg pass, Toll house arboretum site, (-AB), 22 Oct. 2013, <i>Cheek</i> 1874 (NH); EASTERN CAPE: <b>3129 (Port St. Johns)</b> : (-BC), Ntsubane arboretum plot 2P, 1957, <i>Van Rensburg</i> 11271 (PRE); <b>3227 (Stutterheim)</b> : Kubusie plantation, Evelyn Valley arboretum, (-CA), 12 Feb. 2016, <i>Cheek</i> 2478 (NH); <b>3325 (Port Elizabeth)</b> : Port Elizabeth, Victoria Park, (-CC), 14 Jun. 2021, <i>Cheek</i> 2951 (NH); Port Elizabeth, St. George's Park, (-CC), 14 Jun. 2021, <i>Cheek</i> 2963 (NH); <b>3326 (Grahamstown)</b> : Grahamstown botanic garden, (-BC), 15 Jun. 2021, <i>Cheek</i> 2949 (NH). |
| <i>Cupressus lusitanica</i> var. <i>benthamii</i>   | South Africa. MPUMALANGA: <b>2530 (Lydenburg)</b> : Belfast arboretum plot 45, (-CA), Apr. 1922, <i>Robertson</i> 4367 (PRE).                                                                                                                                                                                                                                                                                                                                                                                                                                                                                                                                                                                                                                                                                                                                                                                                                                                                                                                                                                                                                                                                                                                                                                                                                                                                                                                                                                                                                                                                                                                                                                         |
| <i>Cupressus macrocarpa</i>                         | South Africa. GAUTENG: <b>2528 (Pretoria)</b> : University of Pretoria Hatfield campus, (-CC), 28 Aug. 2021, <i>Cheek</i> 3087 (NH); FREE STATE: <b>2926 (Bloemfontein)</b> : Bloemfontein, Third Raadsaal, front garden, (-AA), 18 Jun. 2021, <i>Cheek</i> 2961 (NH); WESTERN CAPE: <b>3326 (Knysna)</b> : Alexandria plantation arboretum, (-CB), 7 Jun. 1963, <i>Poynton</i> 12967 (PRE); <b>3322 (Oudtshoorn)</b> : Saasveld old arboretum, (-DC), Nov. 1961, <i>Schönaus s.n.</i> (PRE). EASTERN CAPE: <b>3226 (Fort Beaufort)</b> : Hogsback, Hogsback arboretum, (-DB), 17 Nov. 2014, <i>Cheek</i> 2236 (NH).                                                                                                                                                                                                                                                                                                                                                                                                                                                                                                                                                                                                                                                                                                                                                                                                                                                                                                                                                                                                                                                                                  |
| <i>Cupressus sargentii</i>                          | South Africa. WESTERN CAPE: <b>3418 (Simons Town)</b> : Tokai paddock arboretum plot 20, (-AB), 29 Sept. 1962, <i>Poynton</i> 12635 (PRE).                                                                                                                                                                                                                                                                                                                                                                                                                                                                                                                                                                                                                                                                                                                                                                                                                                                                                                                                                                                                                                                                                                                                                                                                                                                                                                                                                                                                                                                                                                                                                            |
| <i>Cupressus sempervirens</i>                       | South Africa. GAUTENG: <b>2528 (Pretoria)</b> : Pretoria national botanic garden, Arboretum section, (-CB), 26 Aug. 2021, <i>Cheek</i> 3006 (NH); Union Buildings, Flanagan arboretum, (-CA), 23 Aug. 2021, <i>Cheek</i> 2978 (NH). MPUMALANGA: <b>2529 (Witbank)</b> : Middelburg, Belfast plantation, Pan arboretum, (-DA), 15 Jul. 2014, <i>Cheek</i> 2075 (NH); <b>2530 (Lydenburg)</b> : Belfast arboretum plot 4, (-CA), 2 May 1983, <i>Anon.</i> 1203 (PRE); KWAZULU-NATAL: <b>2930 (Pietermaritzburg)</b> : Pietermaritzburg, KZN botanical gardens, (-CB), 25 Aug. 2015, <i>Cheek</i> 2352 (NH). FREE STATE: <b>2926 (Bloemfontein)</b> : Bloemfontein, Third Raadsaal arboretum, north-eastern corner, (-AA), 18 June 2021, <i>Cheek</i> 2940 (NH).                                                                                                                                                                                                                                                                                                                                                                                                                                                                                                                                                                                                                                                                                                                                                                                                                                                                                                                                         |
| <i>Cupressus torulosa</i>                           | South Africa. LIMPOPO: <b>2329 (Pietersburg)</b> : Louis Trichardt, Hanglip arboretum, (-BB), 13 Sept. 2014, <i>Cheek</i> 2154 (NH); GAUTENG: <b>2528 (Pretoria)</b> : Pretoria national zoo, (-CA), 24 Aug. 2021, <i>Cheek</i> 2984 (NH); MPUMALANGA: <b>2530 (Lydenburg)</b> : Sabie, D.R. de Wet arboretum, (-BB), 9 Jul. 2014, <i>Cheek</i> 2037 (NH); Belfast arboretum. South west corner, plot 70, (-CA), Apr. 1922, <i>Robertson</i> 4363 (PRE); <b>2529 (Witbank)</b> : Middelburg, Belfast plantation, Pan arboretum, (-DA), 15 Jul. 2014, <i>Cheek</i> 2073 (NH). KWAZULU-NATAL: <b>2931 (Stanger)</b> : Durban, Mitchell Park, (-CC), 25 Nov. 2021, <i>Cheek</i> 3109 (NH); EASTERN CAPE: <b>3326 (Grahamstown)</b> : Grahamstown botanic garden, (-BC), 15 June 2021, <i>Cheek</i> 2948 (NH); WESTERN CAPE: <b>3318 (Cape Town)</b> : Table Mountain, Nursery Ravine, (-CD), 27 May 2016, <i>Cheek</i> 2561 (NBG); <b>3418 (Simons Town)</b> : Tokai main arboretum, tree no. 1120, (-AB), Oct. 1962, <i>Poynton</i> 12584 (PRE).                                                                                                                                                                                                                                                                                                                                                                                                                                                                                                                                                                                                                                                        |
| <i>Cunninghamia lanceolata</i>                      | South Africa. LIMPOPO: <b>2329 (Pietersburg)</b> : Tzaneen, Woodbush arboretum, (-DD), 14 Sept. 2014, <i>Cheek</i> 2163 (NH). MPUMALANGA: <b>2530 (Lydenburg)</b> : Sabie, Bergvliet plantation, D.R. de Wet arboretum, (-BB), 9 Jul. 2014, <i>Cheek</i> 2035 (NH).                                                                                                                                                                                                                                                                                                                                                                                                                                                                                                                                                                                                                                                                                                                                                                                                                                                                                                                                                                                                                                                                                                                                                                                                                                                                                                                                                                                                                                   |
| <i>Curtisia dentata</i>                             | South Africa. WESTERN CAPE: <b>3319 (Worcester)</b> : Grabouw, Elgin, Fruitways farm, Eikenhof arboretum, (-AA), 11 Jun. 2021, <i>Cheek</i> 2932 (NH).                                                                                                                                                                                                                                                                                                                                                                                                                                                                                                                                                                                                                                                                                                                                                                                                                                                                                                                                                                                                                                                                                                                                                                                                                                                                                                                                                                                                                                                                                                                                                |
| <i>Cussonia spicata</i>                             | South Africa. GAUTENG: <b>2528 (Pretoria)</b> : Pretoria, Jan Cilliers Park, (-CC), 17 Mar. 2021, <i>Cheek</i> 2822 (NH).                                                                                                                                                                                                                                                                                                                                                                                                                                                                                                                                                                                                                                                                                                                                                                                                                                                                                                                                                                                                                                                                                                                                                                                                                                                                                                                                                                                                                                                                                                                                                                             |

|                                     |                                                                                                                                                                                                                                                                                                                                      |
|-------------------------------------|--------------------------------------------------------------------------------------------------------------------------------------------------------------------------------------------------------------------------------------------------------------------------------------------------------------------------------------|
| <i>Cyclobalanopsis myrsinifolia</i> | WESTERN CAPE: <b>3318 (Cape Town)</b> : Paarl arboretum, (-DB), 3 Nov. 1987, <i>Rycroft 3481</i> (PRE).                                                                                                                                                                                                                              |
| <i>Cytisus prolifer</i>             | South Africa. WESTERN CAPE: <b>3418 (Simons Town)</b> Tokai plantation, Paddock arboretum, (-AB), 5 Jun. 1985, <i>Poynton 19339</i> (PRE).                                                                                                                                                                                           |
| <i>Cytisus scoparius</i>            | South Africa. FREE STATE: <b>2827 (Senekal)</b> : Senekal, NG church garden, (-BC), 16 May 2021, <i>Cheek 2905</i> (NH); KWAZULU-NATAL: <b>2929 (Underberg)</b> : Himeville, Kenmo Lake arboretum, (-DA), 15 Sept. 2021, <i>Cheek 3062</i> , (NH).                                                                                   |
| <i>Dacrydium cupressinum</i>        | KWAZULU-NATAL: <b>2930 (Pietermaritzburg)</b> : Durban, Hillcrest, Makaranga Gardens, (-DD), 4 Jun. 2019, <i>Cheek 2651</i> (NH).                                                                                                                                                                                                    |
| <i>Dahlia imperialis</i>            | KWAZULU-NATAL: <b>2930 (Pietermaritzburg)</b> : Durban, Hillcrest, Makaranga Gardens, (-DD), 4 Jun. 2019, <i>Cheek 2652</i> (NH).                                                                                                                                                                                                    |
| <i>Dais cotinifolia</i>             | South Africa. GAUTENG: <b>2528 (Pretoria)</b> : Pretoria, Jan Cilliers park, (-CC), 17 Mar. 2021, <i>Cheek 2808</i> (NH).                                                                                                                                                                                                            |
| <i>Delonix regia</i>                | South Africa. KWAZULU-NATAL: <b>2931 (Stanger)</b> : Tongaat, Amanzimnyama Garden, (-CA), 25 Nov. 2021, <i>Cheek 3100</i> (NH).                                                                                                                                                                                                      |
| <i>Diospyros mesliliformis</i>      | South Africa. LIMPOPO: <b>2330 (Tzaneen)</b> : Middelkop lower arboretum, (-CC), Feb. 1952, <i>Van Rensburg 10431</i> (PRE).                                                                                                                                                                                                         |
| <i>Diospyros scabrida</i>           | South Africa. GAUTENG: <b>2528 (Pretoria)</b> : Pretoria national botanic garden, (-CB), 27 Aug. 2021, <i>Cheek 3011</i> (NH).                                                                                                                                                                                                       |
| <i>Dodonea viscosa</i>              | South Africa. GAUTENG: <b>2528 (Pretoria)</b> : Pretoria national botanic garden, (-CB), 25 Aug. 2021, <i>Cheek 2997</i> (NH); University of Pretoria, Hatfield campus, (-CC), 28 Aug. 2021, <i>Cheek 3029</i> (NH); FREE STATE: <b>2926 (Bloemfontein)</b> : Bloemfontein arboretum, (-AA), 26 Oct. 1924, <i>Potts 3212</i> (BLFU). |
| <i>Dombeya rotundifolia</i>         | South Africa. GAUTENG: <b>2528 (Pretoria)</b> : Pretoria, Jan Cilliers park, (-CC), 17 Mar. 2021, <i>Cheek 2813</i> (NH); Pretoria, Austin Roberts bird sanctuary, (-CC), 27 Aug. 2021, <i>Cheek 3043</i> (NH).                                                                                                                      |
| <i>Dyopsis decaryi</i>              | South Africa. NORTH WEST: <b>2527 (Rustenburg)</b> : Rustenburg, Sun City triangle palm garden, (-AC), 20 Mar. 2021, <i>Cheek 2830</i> (NH).                                                                                                                                                                                         |
| <i>Dyopsis lutescens</i>            | KWAZULU-NATAL: <b>3030 (Port Shepstone)</b> : Uvongo, Skyline Arboretum, (-CD), 3 Mar. 2022, <i>Cheek 3148</i> (NH).                                                                                                                                                                                                                 |
| <i>Ekebergia capensis</i>           | South Africa. EASTERN CAPE: <b>3325 (Port Elizabeth)</b> : Port Elizabeth, Victoria Park, (-DC), 14 Jun. 2021, <i>Cheek 2955</i> (NH).                                                                                                                                                                                               |
| <i>Elaeocarpus grandis</i>          | South Africa. LIMPOPO: <b>2330 (Tzaneen)</b> : Tzaneen, JDM Keet arboretum, (-CA), 18 Sept. 2019, <i>Cheek 2662</i> (PRE)                                                                                                                                                                                                            |
| <i>Elaeodendron croceum</i>         | South Africa. WESTERN CAPE: <b>3418 (Simons Town)</b> : Tokai arboretum tree no. 531, (-AB), 10 Aug. 1962, <i>Poynton 12586</i> (PRE).                                                                                                                                                                                               |
| <i>Elaeodendron zeyheri</i>         | South Africa. Limpopo: <b>2329 (Pietersburg)</b> : Louis Trichardt, Tree Park, (-BB), 24 Mar. 2021, <i>Cheek 2874</i> (NH)                                                                                                                                                                                                           |
| <i>Erythrina caffra</i>             | South Africa. KWAZULU-NATAL: <b>2931 (Stanger)</b> : Durban, Jameson Park, (-CC), 25 Nov. 2021, <i>Cheek 3114</i> (NH).                                                                                                                                                                                                              |
| <i>Erythrina latissima</i>          | South Africa. GAUTENG: <b>2528 (Pretoria)</b> : Pretoria, Springbok park, (-CA), 17 Mar. 2021, <i>Cheek 2794</i> (NH); South Africa.                                                                                                                                                                                                 |
| <i>Erythrina livingstoneana</i>     | South Africa. KWAZULU-NATAL: <b>2931 (Stanger)</b> : Mitchell Park, (-CC), 8 Apr. 1974, <i>Hennessy 390</i> (NH).                                                                                                                                                                                                                    |
| <i>Erythrina lysistemon</i>         | South Africa. GAUTENG: <b>2528 (Pretoria)</b> : Pretoria national botanic garden, (-??), 25 Aug. 2021, <i>Cheek 2983</i> (NH).                                                                                                                                                                                                       |
| <i>Eucalyptus accedens</i>          | South Africa. WESTERN CAPE: <b>3419 (Caledon)</b> : Grabouw, Lebanon plantation, Lebanon arboretum plot 40, (-AA), 2 Oct. 1934, <i>Anon. 8581</i> (NH).                                                                                                                                                                              |
| <i>Eucalyptus agglomerata</i>       | South Africa. WESTERN CAPE: <b>3323 (Willowmore)</b> : Keurbooms River arboretum plot 3, (-CD), 4 Jan. 1979, <i>Morze 2348</i> (PRE); <b>3322 (Oudtshoorn)</b> : Saasveld arboretum, (-DC), Jul. 1965, <i>Coetzee s.n.</i> (GRA).                                                                                                    |
| <i>Eucalyptus aggregata</i>         | South Africa. MPUMALANGA: <b>2530 (Lydenburg)</b> : Belfast arboretum plot 110, (-CA), Apr. 1923, <i>Robertson 4507</i> (PRE); WESTERN CAPE: <b>3323 (Willowmore)</b> : Keurbooms River arboretum plot                                                                                                                               |



|                                                    |                                                                                                                                                                                                                                                                                                                                                                                                                                                      |
|----------------------------------------------------|------------------------------------------------------------------------------------------------------------------------------------------------------------------------------------------------------------------------------------------------------------------------------------------------------------------------------------------------------------------------------------------------------------------------------------------------------|
|                                                    | 29, (-CD), 29 Oct. 1963, <i>Lange 13140</i> (PRE); <b>3418 (Simons Town)</b> : Tokai main arboretum plot 94, (-AB), 23 Jul. 1923, <i>King 6094</i> (PRE).                                                                                                                                                                                                                                                                                            |
| <i>Eucalyptus albens</i>                           | WESTERN CAPE: <b>3323 (Willowmore)</b> : Keurbooms River arboretum plot 24, (-CD), 1 Nov. 1963, <i>Lange 13125</i> (PRE); <b>3418 (Simons Town)</b> : Tokai arboretum, tree no 364, (-AB), 8 Aug. 1962, <i>Poynton 12607</i> (PRE).                                                                                                                                                                                                                  |
| <i>Eucalyptus andrewsii</i>                        | South Africa. MPUMALANGA: <b>2630 (Carolina)</b> : Ermelo, Chrissiesmeer, Jessievale arboretum, (-BB), 17 Jul. 2014, <i>Cheek 2085</i> (NH).                                                                                                                                                                                                                                                                                                         |
| <i>Eucalyptus astringens</i>                       | South Africa. MPUMALANGA: <b>3323 (Willowmore)</b> : George, arboretum plot 24, (-CD), Nov. 1954, <i>Taylor 1409</i> (PRE).                                                                                                                                                                                                                                                                                                                          |
| <i>Eucalyptus baueriana</i>                        | South Africa. WESTERN CAPE: <b>3326 (Knysna)</b> : Alexandria arboretum plot C14, (-CB), 21 Oct. 1968, <i>Jarman 13958</i> (PRE); <b>3323 (Willowmore)</b> : Keurbooms River Arboretum, plot 15, (-CD), 4 Jan. 1979, <i>Morze 2355</i> (PRE).                                                                                                                                                                                                        |
| <i>Eucalyptus beyeri</i>                           | South Africa. MPUMALANGA: <b>2430 (Pilgrim's Rest)</b> : Salique arboretum, (-DB), Aug. 1945, <i>Loock 10053</i> (PRE).                                                                                                                                                                                                                                                                                                                              |
| <i>Eucalyptus blakelyi</i>                         | South Africa. EASTERN CAPE: <b>3327 (Pieddie)</b> : Fort Grey plantation arboretum, (-BB), Mar. 1929, <i>Emett 7283</i> (PRE).                                                                                                                                                                                                                                                                                                                       |
| <i>Eucalyptus blaxlandii</i>                       | WESTERN CAPE: <b>3323 (Willowmore)</b> : Keurbooms River arboretum plot 6, (-CD), 1 Nov. 1964, <i>Lange 13127</i> (PRE); Lottering arboretum, (-DD), 20 Mar. 1953, <i>Taylor 707</i> (PRE).                                                                                                                                                                                                                                                          |
| <i>Eucalyptus bosistoana</i>                       | South Africa. MPUMALANGA: <b>2530 (Lydenburg)</b> : Belfast arboretum plot 98, (-CA), May 1981, <i>Brown 17008</i> (PRE); WESTERN CAPE: <b>3323 (Willowmore)</b> : Keurbooms River arboretum plot 16, (-CD), 4 Jan. 1979, <i>Morze 2356</i> (PRE).                                                                                                                                                                                                   |
| <i>Eucalyptus bridgesiana</i>                      | South Africa. MPUMALANGA: <b>2530 (Lydenburg)</b> : Belfast arboretum plot 109, (-CA), 16 Mar. 1981, <i>Brown 16260</i> (PRE).                                                                                                                                                                                                                                                                                                                       |
| <i>Eucalyptus caleyi</i>                           | South Africa. NORTH WEST: <b>2626 (Klerksdorp)</b> : Lichtenburg arboretum plot 31, (-AA), 25 May. 1953, <i>Skott 10790</i> (PRE).                                                                                                                                                                                                                                                                                                                   |
| <i>Eucalyptus camaldulensis</i>                    | South Africa. GAUTENG: <b>2528 (Pretoria)</b> : Pretoria national botanic garden, Arboretum section, (-CB), 26 Aug. 2021, <i>Cheek 3009</i> (NH); WESTERN CAPE: <b>3322 (Oudtshoorn)</b> : George, Saasveld forestry college, Saasveld arboretum, (-DC), 23 Jan. 2014, <i>Cheek 1952</i> (NH); <b>3418 (Simons Town)</b> : Tokai arboretum, tree no 292, (-AB), 7 Aug. 1962, <i>Poynton 12601a</i> (PRE).                                            |
| <i>Eucalyptus camaldulensis</i> var. <i>obtusa</i> | South Africa. EASTERN CAPE: <b>3227 (Stutterheim)</b> : Fort Cunynghame plantation, Fort Cunynghame arboretum, (-AD), 15 Nov. 2014, <i>Cheek 2200</i> (NH).                                                                                                                                                                                                                                                                                          |
| <i>Eucalyptus camphora</i>                         | South Africa. MPUMALANGA: <b>2630 (Carolina)</b> : Ermelo, Chrissiesmeer, Jessievale arboretum, (-BB), 17 Jul. 2014, <i>Cheek 2081</i> (NH).                                                                                                                                                                                                                                                                                                         |
| <i>Eucalyptus canaliculata</i>                     | South Africa. KWAZULU-NATAL: <b>2832 (Mtubatuba)</b> : St. Lucia arboretum plot 1c, (-AB), 21 Mar. 1964, <i>Haigh 2362</i> (PRE).                                                                                                                                                                                                                                                                                                                    |
| <i>Eucalyptus capitellata</i>                      | South Africa. WESTERN CAPE: <b>3418 (Simons Town)</b> : Tokai arboretum, plot 366, (-AB), 9 Aug. 1962, <i>Poynton 12629</i> (PRE).                                                                                                                                                                                                                                                                                                                   |
| <i>Eucalyptus carnea</i>                           | South Africa. MPUMALANGA: <b>2630 (Carolina)</b> : Ermelo, Chrissiesmeer, Jessievale arboretum, (-BB), 17 Jul. 2014, <i>Cheek 2083</i> (NH).                                                                                                                                                                                                                                                                                                         |
| <i>Eucalyptus cinerea</i>                          | South Africa. MPUMALANGA: <b>2529 (Witbank)</b> : Middelburg, Belfast plantations, Pan arboretum, (-DA), 15 Jul. 2014, <i>Cheek 2076</i> (NH); KWAZULU-NATAL: <b>2929 (Underberg)</b> : Himeville, Kenmo Lake arboretum, (-DA), 15 Sept. 2021, <i>Cheek 3050</i> (NH).                                                                                                                                                                               |
| <i>Eucalyptus citriodora</i>                       | South Africa. WESTERN CAPE: <b>3418 (Simons Town)</b> : Tokai plantation, plot 417, main arboretum, (-AB), 14 Mar. 1986, <i>Poynton 19712</i> (PRE).                                                                                                                                                                                                                                                                                                 |
| <i>Eucalyptus cladocalyx</i>                       | South Africa. WESTERN CAPE: <b>3322 (Oudtshoorn)</b> : Kleinplaat arboretum plot 3, (-DC), n.d., <i>Lange 13310</i> (PRE); Saasveld arboretum (-DC), 4 Feb. 1965, <i>Hechter s.n.</i> (GRA); <b>3323 (Willowmore)</b> : Keurbooms River arboretum plot 9, (-CD), 4 Jan. 1979, <i>Morze 2352</i> (PRE); EASTERN CAPE: <b>3227 (Stutterheim)</b> : Fort Cunynghame plantation, Fort Cunynghame arboretum, (-AD), 11 Jan. 2013, <i>Cheek 1522</i> (NH). |
| <i>Eucalyptus conica</i>                           | South Africa. NORTH WEST: <b>2626 (Klerksdorp)</b> : Lichtenburg arboretum, (-AA), Jul. 1953, <i>Forester 10816</i> (PRE).                                                                                                                                                                                                                                                                                                                           |

|                                                           |                                                                                                                                                                                                                                                                                                                                                                                 |
|-----------------------------------------------------------|---------------------------------------------------------------------------------------------------------------------------------------------------------------------------------------------------------------------------------------------------------------------------------------------------------------------------------------------------------------------------------|
| <i>Eucalyptus cornuta</i>                                 | South Africa. WESTERN CAPE: <b>3322 (Oudtshoorn)</b> : Kleinplaat arboretum plot 6, (-DC), n.d., <i>Lange 13311</i> (PRE); <b>3418 (Simons Town)</b> : Tokai main arboretum, plot 372, (-AB), 6 Aug. 1962, <i>Poynton 12608</i> (PRE).                                                                                                                                          |
| <i>Eucalyptus crebra</i>                                  | South Africa. NORTH WEST: <b>2626 (Klerksdorp)</b> : Lichtenburg arboretum, (-AA), 23 May. 1953, <i>Skott 10784</i> (PRE).                                                                                                                                                                                                                                                      |
| <i>Eucalyptus dealbata</i>                                | South Africa. NORTH WEST: <b>2626 (Klerksdorp)</b> : Lichtenburg arboretum, (-AA), 25 May. 1953, <i>Skott 10791</i> (PRE).                                                                                                                                                                                                                                                      |
| <i>Eucalyptus deanei</i>                                  | South Africa. MPUMALANGA: <b>2530 (Lydenburg)</b> : Belfast arboretum plot 94, (-CA), 2 May 1983, <i>Anon. 1214</i> (PRE);                                                                                                                                                                                                                                                      |
| <i>Eucalyptus decipiens</i>                               | South Africa. WESTERN CAPE: <b>3418 (Simons Town)</b> : Tokai main arboretum, plot 66, (-AB), 13 Jul. 1922, <i>King 4325</i> (PRE).                                                                                                                                                                                                                                             |
| <i>Eucalyptus delegatensis</i>                            | South Africa. MPUMALANGA: <b>2530 (Lydenburg)</b> : Belfast arboretum plot 100, (-CA), 18 Mar. 1981, <i>Poynton 16937</i> (PRE); WESTERN CAPE: <b>3323 (Willowmore)</b> : Lottering arboretum plot 1, (-DD), 31 Mar. 1981, <i>Pretorius 16936</i> (PRE).                                                                                                                        |
| <i>Eucalyptus delegatensis</i> subsp. <i>tasmaniensis</i> | South Africa. WESTERN CAPE: <b>3418 (Simons Town)</b> : Tokai arboretum, plot 376, (-AB), 9 Aug. 1962, <i>Poynton 12620</i> (PRE).                                                                                                                                                                                                                                              |
| <i>Eucalyptus diversicolor</i>                            | South Africa. WESTERN CAPE: <b>3418 (Simons Town)</b> : Tokai arboretum, tree no 1264, (-AB), Oct. 1962, <i>Poynton 12589</i> (PRE).                                                                                                                                                                                                                                            |
| <i>Eucalyptus dives</i>                                   | South Africa. MPUMALANGA: <b>2530 (Lydenburg)</b> : Belfast arboretum plot 91B, (-CA), 12 Mar. 1981, <i>Brown 16832</i> (PRE); WESTERN CAPE: <b>3418 (Simons Town)</b> : Tokai main arboretum, plot 90, (-AB), 13 Jun. 1922, <i>King 4338</i> (PRE).                                                                                                                            |
| <i>Eucalyptus elata</i>                                   | South Africa. KWAZULU-NATAL: <b>2929 (Underberg)</b> : Estcourt, Draycott arboretum, (-BA), 30 May 2011, <i>Cheek 910</i> , (NH); WESTERN CAPE: <b>3323 (Willowmore)</b> : Keurbooms River arboretum plot 30, (-CD), 4 Jan. 1979, <i>Morze 2371</i> (PRE); <b>3418 (Simons Town)</b> : Tokai arboretum, plot 396, (-AB), 8 Aug. 1962, <i>Poynton 12613</i> (PRE).               |
| <i>Eucalyptus erythronema</i>                             | South Africa. WESTERN CAPE: <b>3319 (Worcester)</b> : Robertson arboretum, (-DD), 29 Jan. 1915, <i>Roberston 1403</i> (PRE).                                                                                                                                                                                                                                                    |
| <i>Eucalyptus eugenioides</i>                             | South Africa. WESTERN CAPE: <b>3323 (Willowmore)</b> : Keurbooms River arboretum plot 11, (-CD), 4 Jan. 1979, <i>Morze 2352</i> (PRE); WESTERN CAPE: <b>3323 (Willowmore)</b> : Lottering arboretum, (-DD), Oct. 1976, <i>Anon. 15709</i> (PRE).                                                                                                                                |
| <i>Eucalyptus exerta</i>                                  | South Africa. MPUMALANGA: <b>2430 (Pilgrim's Rest)</b> : Salique arboretum, (-DB), Aug. 1945, <i>Loock 10054</i> (PRE); KWAZULU-NATAL: <b>2832 (Mtubatuba)</b> : Empangeni, Kwambonambi arboretum, (-CA), 12 Jun. 2013, <i>Cheek 1716</i> (NH).                                                                                                                                 |
| <i>Eucalyptus fastigiata</i>                              | South Africa. WESTERN CAPE: <b>3323 (Willowmore)</b> : Keurbooms River arboretum plot 21, (-CD), 29 Oct. 1963, <i>Lange 13130</i> (PRE); EASTERN CAPE: <b>3227 (Stutterheim)</b> : Fort Cunynghame plantation, Fort Cunynghame arboretum, (-AD), 15 Nov. 2013, <i>Cheek 2201</i> (NH).                                                                                          |
| <i>Eucalyptus foecunda</i>                                | South Africa. WESTERN CAPE: <b>3319 (Worcester)</b> : Robertson arboretum, (-DD), 29 Jan. 1915, <i>Robertson 1402</i> (PRE); <b>3418 (Simons Town)</b> : Tokai arboretum, compartment B55 area 3, (-AB), Dec. 1919, <i>Zahn 3701</i> (PRE).                                                                                                                                     |
| <i>Eucalyptus globoidea</i>                               | South Africa. WESTERN CAPE: <b>3323 (Willowmore)</b> : Keurbooms River arboretum plot 11, (-CD), 29 Oct. 1963, <i>Lange 13136</i> (PRE); Storms River arboretum plot 6, (-DD), Sept. 1965, <i>Forester 13678</i> (PRE); <b>3322 (Oudtshoorn)</b> : George, Saasveld forestry college, Saasveld arboretum, (-DC), 26 Jan. 2014, <i>Cheek 1965</i> (NH).                          |
| <i>Eucalyptus globulus</i> subsp. <i>maidenii</i>         | South Africa. MPUMALANGA: <b>2530 (Lydenburg)</b> : Belfast arboretum plot 101, (-CA), 2 May 1983, <i>Anon. 17694</i> (PRE); EASTERN CAPE: <b>3326 (Grahamstown)</b> : Alexandria C5: Arboretum, (-CB), May 1928, <i>Jarman 13955</i> (PRE).                                                                                                                                    |
| <i>Eucalyptus gomphocephala</i>                           | South Africa. WESTERN CAPE: <b>3323 (Willowmore)</b> : Keurbooms River arboretum plot 8, (-CD), 4 Jan. 1979, <i>Morze 2351</i> (PRE); EASTERN CAPE: <b>3326 (Grahamstown)</b> : Alexandria C2: Arboretum, (-CB), 21 Oct. 1968, <i>Jarman 13956</i> (PRE).                                                                                                                       |
| <i>Eucalyptus grandis</i>                                 | South Africa. LIMPOPO: <b>2230 (Messina)</b> : Louis Trichardt, Entabeni main arboretum, (-CD), 11 Sept. 2014, <i>Cheek 2128</i> (NH). WESTERN CAPE: <b>3322 (Oudtshoorn)</b> : George, Saasveld forestry college, Saasveld arboretum, (-DC), 26 Jan. 2014, <i>Cheek 1970</i> (NH); <b>3418 (Simons Town)</b> : Tokai main arboretum, (-AB), Aug. 1923, <i>King 5349</i> (PRE). |
| <i>Eucalyptus guilfoylei</i>                              | South Africa. WESTERN CAPE: <b>3418 (Simons Town)</b> : Tokai, paddock arboretum, plot A5c, (-AB), 18 Jul. 1983, <i>Poynton 17781</i> (PRE).                                                                                                                                                                                                                                    |

|                                                     |                                                                                                                                                                                                                                                                                                                                                                                                 |
|-----------------------------------------------------|-------------------------------------------------------------------------------------------------------------------------------------------------------------------------------------------------------------------------------------------------------------------------------------------------------------------------------------------------------------------------------------------------|
| <i>Eucalyptus heamostoma</i>                        | South Africa. WESTERN CAPE: <b>3418 (Simons Town)</b> : Tokai, plot 410, main arboretum, (-AB), 18 Jul. 1983, <i>Poynton 17782</i> (PRE).                                                                                                                                                                                                                                                       |
| <i>Eucalyptus jacksonii</i>                         | South Africa. WESTERN CAPE: <b>3418 (Simons Town)</b> : Tokai, Spekboom Belt arboretum, compartment B27c, (-AB), 18 Jul. 1983, <i>Poynton 17783</i> (PRE).                                                                                                                                                                                                                                      |
| <i>Eucalyptus × jugalis</i>                         | South Africa. WESTERN CAPE: <b>3319 (Worcester)</b> : Robertson arboretum, (-DD), 29 Jan. 1915, <i>Robertson 1400</i> (PRE); <b>3418 (Simons Town)</b> : Tokai main arboretum plot 83, (-AB), 13 Jul. 1922, <i>King 4333</i> (PRE).                                                                                                                                                             |
| <i>Eucalyptus laevopinea</i>                        | South Africa. WESTERN CAPE: <b>3323 (Willowmore)</b> : Keurbooms River arboretum plot 14, (-CD), 1 Apr. 1979, <i>Morze 2354</i> (PRE); <b>3418 (Simons Town)</b> : Tokai arboretum, tree no. 439, (-AB), 9 Aug. 1962, <i>Poynton 12628</i> (PRE); EASTERN CAPE: <b>3227 (Stutterheim)</b> : Fort Cunynghame plantation, Fort Cunynghame arboretum, (-AD), 15 Nov. 2013, <i>Cheek 2203</i> (NH). |
| <i>Eucalyptus largiflorens</i>                      | South Africa. WESTERN CAPE: <b>3418 (Simons Town)</b> : Tokai arboretum, compartment B55, (-AB), n.d., <i>Zahn 3703</i> (PRE).                                                                                                                                                                                                                                                                  |
| <i>Eucalyptus lehmanii</i>                          | South Africa. WESTERN CAPE: <b>3418 (Simons Town)</b> : Tokai arboretum, (-AB), 20 Mar 1940, <i>Luckhoff 225</i> (PRE).                                                                                                                                                                                                                                                                         |
| <i>Eucalyptus leucoxylon</i>                        | South Africa. GAUTENG: <b>2528 (Pretoria)</b> : University of Pretoria, Hatfield campus, (-CC), 28 Aug. 2021, <i>Cheek 3073</i> (NH); WESTERN CAPE: <b>3323 (Willowmore)</b> : Keurbooms River arboretum plot 26, (-CD), 4 Jan. 1979, <i>Morze 2367</i> (PRE); <b>3418 (Simons Town)</b> : Tokai main arboretum, plot 84, (-AB), Aug. 1923, <i>King 4334</i> (PRE).                             |
| <i>Eucalyptus leucoxylon</i> subsp. <i>pruinosa</i> | South Africa. MPUMALANGA: <b>2529 (Witbank)</b> : Middelburg, Belfast plantations, Pan arboretum, (-DA), 15 Jul. 2014, <i>Cheek 2071</i> (NH); KWAZULU-NATAL: <b>2931 (Stanger)</b> : Tongaat, Amanzimnyama Garden, (-CA), 25 Nov. 2021, <i>Cheek 3098</i> (NH).                                                                                                                                |
| <i>Eucalyptus longifolia</i>                        | South Africa. WESTERN CAPE: <b>3322 (Oudtshoorn)</b> : Kleinplaat arboretum plot 11, (-DC), 2 Jan. 1973, <i>Morze 15534</i> (PRE); <b>3418 (Simons Town)</b> : Tokai arboretum, tree no. 340, (-AB), 7 Aug. 1962, <i>Poynton 12602</i> (PRE).                                                                                                                                                   |
| <i>Eucalyptus macarthurii</i>                       | South Africa. KWAZULU-NATAL: <b>2929 (Underberg)</b> : Himeville, Kenmo Lake arboretum, (-DA), 15 Sept. 2021, <i>Cheek 3052</i> (NH); WESTERN CAPE: <b>3323 (Willowmore)</b> : Keurbooms River arboretum plot 14, (-CD), 1 Nov. 1963, <i>Lange 13124</i> (PRE).                                                                                                                                 |
| <i>Eucalyptus macrorhyncha</i>                      | South Africa. WESTERN CAPE: <b>3418 (Simons Town)</b> : Tokai main arboretum, plot 415, (-AB), 9 Aug. 1962, <i>Poynton 12876</i> (PRE).                                                                                                                                                                                                                                                         |
| <i>Eucalyptus maculata</i>                          | South Africa. EASTERN CAPE: <b>3129 (Port St. Johns)</b> : (-BC), Ntsubane arboretum plot 1, 30 Aug. 1962, <i>Haigh 2293</i> (PRE).                                                                                                                                                                                                                                                             |
| <i>Eucalyptus mannifera</i>                         | South Africa. MPUMALANGA: <b>2530 (Lydenburg)</b> : Belfast arboretum plot 99, (-CA), n.d., <i>Van Rensburg 13960</i> (PRE).                                                                                                                                                                                                                                                                    |
| <i>Eucalyptus marginata</i>                         | South Africa. WESTERN CAPE: <b>3322 (Oudtshoorn)</b> : Kleinplaat arboretum plot 20, (-DC), n.d., <i>Lange 13581</i> (PRE); <b>3323 (Willowmore)</b> : Keurbooms River arboretum plot 61, (-CD), 4 Jan. 1979, <i>Morze 2373</i> (PRE); <b>3418 (Simons Town)</b> : Tokai arboretum, (-AB), 20 Mar. 1940, <i>Luckhoff 222</i> (PRE).                                                             |
| <i>Eucalyptus megacarpa</i>                         | South Africa. WESTERN CAPE: <b>3418 (Simons Town)</b> : Tokai main arboretum, plot B, (-AB), 13 Jul. 1922, <i>King 4326</i> (PRE).                                                                                                                                                                                                                                                              |
| <i>Eucalyptus melanophloia</i>                      | South Africa. NORTH WEST: <b>2626 (Klerksdorp)</b> : Lichtenburg arboretum, (-AA), 23 May 1953, <i>Skott 10782</i> (PRE); MPUMALANGA: <b>2430 (Pilgrim's Rest)</b> : Salique arboretum, (-DB), Aug. 1945, <i>Loock 10055</i> (PRE).                                                                                                                                                             |
| <i>Eucalyptus melliodora</i>                        | South Africa. MPUMALANGA: <b>2530 (Lydenburg)</b> : Belfast arboretum plot 111, (-CA), 16 Mar. 1981, <i>Brown 16259</i> (PRE); WESTERN CAPE: <b>3323 (Willowmore)</b> : Keurbooms River arboretum plot 29, (-CD), 4 Jan. 1979, <i>Morze 2370</i> (PRE); <b>3418 (Simons Town)</b> : Tokai arboretum, tree no. 444, (-AB), 10 Aug. 1962, <i>Poynton 12638</i> (PRE).                             |
| <i>Eucalyptus microcorys</i>                        | South Africa. LIMPOPO: <b>2330 (Tzaneen)</b> : Louis Trichardt, Entabeni plantation, Lower arboretum, (-AA), 12 Sept. 2014, <i>Cheek 2144</i> (NH); Commonwealth arboretum, (-CC), 14 Sept. 2014, <i>Cheek 2161</i> (NH); WESTERN CAPE: <b>3418 (Simons Town)</b> : Tokai arboretum, plot 412, (-AB), 9 Aug. 1962, <i>Poynton 12634</i> (PRE).                                                  |
| <i>Eucalyptus microtheca</i>                        | South Africa. NORTH WEST: <b>2626 (Klerksdorp)</b> : Lichtenburg arboretum, (-AA), 23 May. 1953, <i>Skott 10792</i> (PRE).                                                                                                                                                                                                                                                                      |
| <i>Eucalyptus muelleriana</i>                       | South Africa. KWAZULU-NATAL: <b>3029 (Kokstad)</b> : Border arboretum plot J1, (-DA), Oct. 1964, <i>Haigh 2405</i> (PRE); WESTERN CAPE: <b>3323 (Willowmore)</b> : Keurbooms River arboretum plot 13, (-                                                                                                                                                                                        |

|                                                     |                                                                                                                                                                                                                                                                                                                                                                       |
|-----------------------------------------------------|-----------------------------------------------------------------------------------------------------------------------------------------------------------------------------------------------------------------------------------------------------------------------------------------------------------------------------------------------------------------------|
|                                                     | CD), 4 Jan. 1979, <i>Morze 2345</i> (PRE); <b>3322 (Oudtshoorn)</b> : George plantation arboretum, (-CD), 8 Oct. 1954, <i>Taylor 1414</i> (PRE); <b>3418 (Simons Town)</b> : Tokai arboretum, plot 425, (-AB), 9 Aug. 1962, <i>Poynton 12611</i> (PRE); EASTERN CAPE: <b>3325 (Port Elizabeth)</b> : Loerie arboretum, (-CC), 25 Aug. 1952, <i>Skott 10627</i> (PRE). |
| <i>Eucalyptus nicholii</i>                          | South Africa. EASTERN CAPE: <b>3227 (Stutterheim)</b> : Fort Cunynghame plantation, Fort Cunynghame arboretum, (-AD), 11 Jan. 2013, <i>Cheek 1520</i> (NH).                                                                                                                                                                                                           |
| <i>Eucalyptus nitens</i>                            | South Africa. MPUMALANGA: <b>2630 (Carolina)</b> : Ermelo, Chrissiesmeer, Jessievale arboretum, (-BB), 17 Jul. 2014, <i>Cheek 2084</i> (NH). EASTERN CAPE: <b>3227 (Stutterheim)</b> : Fort Cunynghame plantation, Fort Cunynghame arboretum, (-AD), 11 Jan. 2013, <i>Cheek 1519</i> (NH).                                                                            |
| <i>Eucalyptus obliqua</i>                           | South Africa. WESTERN CAPE: <b>3322 (Oudtshoorn)</b> : George, Saasveld forestry college, Saasveld arboretum, (-DC), 26 Jan. 2014, <i>Cheek 1969</i> (NH); <b>3418 (Simons Town)</b> : Tokai arboretum, plot 380, (-AB), 9 Aug. 1962, <i>Poynton 12633</i> (PRE).                                                                                                     |
| <i>Eucalyptus occidentalis</i>                      | South Africa. WESTERN CAPE: <b>3319 (Worcester)</b> : Kluitjieskraal arboretum, (-AC), 15 Oct. 1915, <i>Anon. 1707</i> (PRE); Robertson arboretum, (-DD), 13 Jul. 1915, <i>Dale 1638</i> (PRE); <b>3418 (Simons Town)</b> : Tokai arboretum, tree no. 442, (-AB), 10 Aug. 1962, <i>Poynton 12640</i> (PRE).                                                           |
| <i>Eucalyptus ovata</i>                             | South Africa. MPUMALANGA: <b>2530 (Lydenburg)</b> : Belfast arboretum plot 110, (-CA), May 1981, <i>Brown 16922</i> (PRE); WESTERN CAPE: <b>3323 (Willowmore)</b> : Keurboom River arboretum plot 12, (-CD), 1 Nov. 1963, <i>Lange 13119</i> (PRE); <b>3319 (Worcester)</b> : Kluitjieskraal arboretum, (-AC), Apr. 1922, <i>Botha 4510</i> (PRE).                    |
| <i>Eucalyptus paniculata</i>                        | South Africa. LIMPOPO. <b>2330 (Tzaneen)</b> : Tzaneen, Commonwealth arboretum, (-CC), 14 Sept. 2014, <i>Cheek 2162</i> (NH). KWAZULU-NATAL: <b>2732 (Ubombo)</b> : Mbazwane, Manzangwenya arboretum, (-BA), 21 Jan. 2016, <i>Cheek 2430</i> (NH).                                                                                                                    |
| <i>Eucalyptus patens</i>                            | South Africa. WESTERN CAPE: <b>3418 (Simons Town)</b> : Tokai main arboretum, plot 361, (-AB), 18 Jul. 1983, <i>Poynton 17786</i> (PRE)                                                                                                                                                                                                                               |
| <i>Eucalyptus pauciflora</i>                        | South Africa. MPUMALANGA: <b>2530 (Lydenburg)</b> : Belfast arboretum plot 106, (-CA), 12 Mar. 1981, <i>Brown 17030</i> (PRE); KWAZULU-NATAL: <b>2929 (Underberg)</b> : Himeville, Kenmo Lake arboretum, (-DA), 15 Sept. 2021, <i>Cheek 3064</i> (NH).                                                                                                                |
| <i>Eucalyptus pellita</i>                           | WESTERN CAPE: <b>3319 (Worcester)</b> : Kluitjieskraal arboretum, (-AC), 27 Jan. 1915, <i>Robertson 1407</i> (PRE); <b>3418 (Simons Town)</b> : Tokai arboretum, plot 447, (-AB), 10 Aug. 1962, <i>Poynton 12639</i> (PRE).                                                                                                                                           |
| <i>Eucalyptus pilularis</i>                         | South Africa. EASTERN CAPE: <b>3227 (Stutterheim)</b> : Fort Cunynghame plantation, Fort Cunynghame arboretum, 15 Nov. 2014, <i>Cheek 2199</i> (NH).                                                                                                                                                                                                                  |
| <i>Eucalyptus piperita</i>                          | South Africa. WESTERN CAPE: <b>3418 (Simons Town)</b> : Tokai corner of arboretum, plot 419, (-AB), 9 Aug. 1962, <i>Poynton 12622</i> (PRE)                                                                                                                                                                                                                           |
| <i>Eucalyptus polyanthemus</i>                      | South Africa. WESTERN CAPE: <b>3418 (Simons Town)</b> : Tokai arboretum, plot 382, (-AB), 9 Aug. 1962, <i>Poynton 12621</i> (PRE)                                                                                                                                                                                                                                     |
| <i>Eucalyptus propinqua</i>                         | South Africa. WESTERN CAPE: <b>3418 (Simons Town)</b> : Tokai arboretum, tree no. 424, (-AB), 10 Aug. 1962, <i>Poynton 12642</i> (PRE)                                                                                                                                                                                                                                |
| <i>Eucalyptus pulchella</i>                         | South Africa. WESTERN CAPE: <b>3418 (Simons Town)</b> : Tokai main arboretum, plot 84, (-AB), 13 Jul. 1922, <i>King 4336</i> (PRE)                                                                                                                                                                                                                                    |
| <i>Eucalyptus punctata</i>                          | South Africa. WESTERN CAPE: <b>3322 (Oudtshoorn)</b> : Saasveld arboretum, (-DC), n.d., <i>Verdoucq s.n.</i> (GRA).                                                                                                                                                                                                                                                   |
| <i>Eucalyptus radiata</i> subsp. <i>radiata</i>     | South Africa. WESTERN CAPE: <b>3418 (Simons Town)</b> : Tokai arboretum, plot 408, (-AB), 8 Aug. 1962, <i>Poynton 12878</i> (PRE).                                                                                                                                                                                                                                    |
| <i>Eucalyptus radiata</i> subsp. <i>robertsonii</i> | South Africa. WESTERN CAPE: <b>3322 (Oudtshoorn)</b> : Karbonaatjieskraal arboretum, (-DC), 18 Feb. 1984, <i>Poynton 19318</i> (PRE).                                                                                                                                                                                                                                 |
| <i>Eucalyptus ravidia</i>                           | South Africa. WESTERN CAPE: <b>3319 (Worcester)</b> : Robertson arboretum, (-DD), 29 Jan. 1915, <i>Robertson 1405</i> (PRE).                                                                                                                                                                                                                                          |
| <i>Eucalyptus redunca</i>                           | South Africa. WESTERN CAPE: <b>3319 (Worcester)</b> : Kluitjieskraal arboretum, (-AC), Oct. 1915, <i>Anon. 1701</i> (PRE); <b>3418 (Simons Town)</b> : Tokai arboretum, (-AB), 24 Oct. 1915, <i>Wilmot 1731</i> (PRE).                                                                                                                                                |
| <i>Eucalyptus regnans</i>                           | South Africa. WESTERN CAPE: <b>3323 (Willowmore)</b> : Lottering arboretum plot E17, (-DD), Oct. 1978, <i>Morze 15938</i> (PRE); <b>3418 (Simons Town)</b> : Tokai arboretum, tree no. 445, (-AB), 9 Aug. 1962, <i>Poynton 12714</i> (PRE).                                                                                                                           |



|                                                         |                                                                                                                                                                                                                                                                                                                                                                                                                                                                                                        |
|---------------------------------------------------------|--------------------------------------------------------------------------------------------------------------------------------------------------------------------------------------------------------------------------------------------------------------------------------------------------------------------------------------------------------------------------------------------------------------------------------------------------------------------------------------------------------|
| <i>Eucalyptus resinifera</i>                            | South Africa. WESTERN CAPE: <b>3322 (Oudtshoorn)</b> : Saasveld arboretum, (-DC), Sept. 1965, <i>Van der Walt s.n.</i> (GRA); <b>3418 (Simons Town)</b> : Tokai arboretum, plot 443, (-AB), 10 Aug. 1962, <i>Poynton 12637</i> (PRE); EASTERN CAPE: <b>3227 (Stutterheim)</b> : Fort Cunynghame plantation, Fort Cunynghame arboretum, (-AD), 11 Jan. 2013, <i>Cheek 1518</i> (NH); <b>3326 (Grahamstown)</b> : Alexandria arboretum plot C3, (-CB), 21 Oct. 1968, <i>Jarman 13957</i> (PRE).          |
| <i>Eucalyptus risdonii</i>                              | WESTERN CAPE: <b>3319 (Worcester)</b> : Kluitjieskraal arboretum, (-AC), 27 Jan. 1915, <i>Robertson 1410</i> (PRE); <b>3418 (Simons Town)</b> : Tokai main arboretum, plot 76, (-AB), 13 Jul. 1922, <i>King 4327</i> (PRE); EASTERN CAPE: <b>3227 (Stutterheim)</b> : Fort Cunynghame 'C' arboretum (-AD), Feb. 1928, <i>Mitchell 7020</i> (PRE).                                                                                                                                                      |
| <i>Eucalyptus robusta</i>                               | South Africa. WESTERN CAPE: <b>3322 (Oudtshoorn)</b> : George, Saasveld forestry college, Saasveld arboretum, (-DC), 26 Jan. 2014, <i>Cheek 1971</i> (NH); <b>3418 (Simons Town)</b> : Tokai arboretum, tree no. 401A, (-AB), 10 Aug. 1962, <i>Poynton 12644</i> (PRE).                                                                                                                                                                                                                                |
| <i>Eucalyptus saligna</i>                               | South Africa. WESTERN CAPE: <b>3418 (Simons Town)</b> : Tokai arboretum, plot 37, (-AB), 21 Oct. 1920, <i>Anon. 3123</i> (PRE).                                                                                                                                                                                                                                                                                                                                                                        |
| <i>Eucalyptus salmonophloia</i>                         | EASTERN CAPE: <b>3227 (Stutterheim)</b> : Fort Cunynghame 'C' arboretum (-AD), Feb. 1928, <i>Mitchell 7024</i> (PRE).                                                                                                                                                                                                                                                                                                                                                                                  |
| <i>Eucalyptus sideroxylon</i>                           | South Africa: GAUTENG: <b>2528 (Pretoria)</b> : Pretoria, Groenkloof nature reserve, picnic site, (-CB), 29 Jul. 2011, <i>Cheek 938</i> , (NH); WESTERN CAPE: <b>3319 (Worcester)</b> : Robertson arboretum, (-DD), 10 Mar. 1960, <i>Brent 11578</i> (PRE).                                                                                                                                                                                                                                            |
| <i>Eucalyptus sideroxylon</i> subsp. <i>sideroxylon</i> | South Africa. MPUMALANGA: <b>2529 (Witbank)</b> : Middelburg, Belfast plantation, Pan arboretum, (-DA), 15 Jul. 2014, <i>Cheek 2080</i> (NH). WESTERN CAPE: <b>3322 (Oudtshoorn)</b> : George, Saasveld forestry college, Saasveld arboretum, (-DC), 23 Jan. 2014, <i>Cheek 1950</i> (NH); <b>3319 (Worcester)</b> : Kluitjieskraal arboretum, (-AC), 15 Oct. 1915, <i>Anon. 1709</i> (PRE); <b>3418 (Simons Town)</b> : Tokai arboretum, sample plot, (-AB), 27 Sept. 1915, <i>Wilmot 1658</i> (PRE). |
| <i>Eucalyptus sieberi</i>                               | South Africa. WESTERN CAPE: <b>3322 (Oudtshoorn)</b> : George arboretum plot 20, (CD-), n.d., <i>Taylor 1398</i> (PRE); <b>3323 (Willowmore)</b> : Keurbooms River arboretum plot 1, (-CD), 4 Jan. 1979, <i>Morze 2346</i> (PRE); <b>3418 (Simons Town)</b> : Tokai arboretum, plot 388, (-AB), 8 Aug. 1962, <i>Poynton 12603</i> (PRE).                                                                                                                                                               |
| <i>Eucalyptus smithii</i>                               | South Africa. WESTERN CAPE: <b>3323 (Willowmore)</b> : Keurbooms River arboretum plot 32, (-CD), 4 Jan. 1979, <i>Morze 2374</i> (PRE).                                                                                                                                                                                                                                                                                                                                                                 |
| <i>Eucalyptus stellulata</i>                            | South Africa. MPUMALANGA: <b>2530 (Lydenburg)</b> : Belfast arboretum plot 97, (-CA), 12 Mar. 1981, <i>Brown 17021</i> (PRE);                                                                                                                                                                                                                                                                                                                                                                          |
| <i>Eucalyptus stricklandii</i>                          | South Africa. WESTERN CAPE: <b>3319 (Worcester)</b> : Robertson arboretum plot 75, (-DD), 10 Mar. 1960, <i>Poynton &amp; Brent 11595</i> (PRE).                                                                                                                                                                                                                                                                                                                                                        |
| <i>Eucalyptus stricta</i>                               | South Africa. WESTERN CAPE: <b>3418 (Simons Town)</b> : Tokai main arboretum, plot 81, (-AB), 13 Jul. 1922, <i>King 4331</i> (PRE).                                                                                                                                                                                                                                                                                                                                                                    |
| <i>Eucalyptus tereticornis</i>                          | South Africa. WESTERN CAPE: <b>3323 (Willowmore)</b> : Keurbooms River arboretum plots 4 and 5, (-CD), 4 Jan. 1979, <i>Morze 2349</i> (PRE).                                                                                                                                                                                                                                                                                                                                                           |
| <i>Eucalyptus tetraptera</i>                            | WESTERN CAPE: <b>3323 (Willowmore)</b> : Keurbooms River arboretum plot 63, (-CD), 1 May 1975, <i>Poynton 15582</i> (PRE); <b>3418 (Simons Town)</b> : Tokai arboretum, (-AB), Nov. 1941, <i>Anon. 9364</i> (PRE).                                                                                                                                                                                                                                                                                     |
| <i>Eucalyptus todtiana</i>                              | South Africa. WESTERN CAPE: <b>3418 (Simons Town)</b> : Tokai main arboretum, plot 10, (-AB), 13 Jul. 1922, <i>King 4322</i> (PRE).                                                                                                                                                                                                                                                                                                                                                                    |
| <i>Eucalyptus torquata</i>                              | South Africa. WESTERN CAPE: <b>3319 (Worcester)</b> : Robertson arboretum, (-DD), Oct. 1931, <i>Keet 7984</i> (PRE).                                                                                                                                                                                                                                                                                                                                                                                   |
| <i>Eucalyptus × trabutii</i>                            | South Africa. WESTERN CAPE: <b>3418 (Simons Town)</b> : Tokai, Eucalyptetum adjoining main arboretum, (-AB), Sept. 1916, <i>Anon. 2026</i> (PRE).                                                                                                                                                                                                                                                                                                                                                      |
| <i>Eucalyptus transcontinentalis</i>                    | South Africa. WESTERN CAPE: <b>3319 (Worcester)</b> : Robertson arboretum plot 75, (-DD), 24 Aug. 1923, <i>Wainwright 5370</i> (PRE).                                                                                                                                                                                                                                                                                                                                                                  |
| <i>Eucalyptus urnigera</i>                              | South Africa. MPUMALANGA: <b>2629 (Bethal)</b> : Ermelo old arboretum, (-DB), Apr. 1928, <i>Forester 7262</i> (PRE).                                                                                                                                                                                                                                                                                                                                                                                   |
| <i>Eucalyptus viminalis</i> subsp. <i>cygnetensis</i>   | South Africa. MPUMALANGA: <b>2530 (Lydenburg)</b> : Belfast arboretum plot 99, (-CA), 16 Mar. 1981, <i>Brown 16257</i> (PRE);                                                                                                                                                                                                                                                                                                                                                                          |

|                                                     |                                                                                                                                                                                                                                                                                                                                                                                                                                                                                                                                                                                        |
|-----------------------------------------------------|----------------------------------------------------------------------------------------------------------------------------------------------------------------------------------------------------------------------------------------------------------------------------------------------------------------------------------------------------------------------------------------------------------------------------------------------------------------------------------------------------------------------------------------------------------------------------------------|
| <i>Eucalyptus viminalis</i> subsp. <i>viminalis</i> | South Africa. WESTERN CAPE: <b>3418 (Simons Town)</b> : Tokai arboretum, plot 440, (-AB), 9 Aug. 1962, <i>Poynton</i> 12615 (PRE).                                                                                                                                                                                                                                                                                                                                                                                                                                                     |
| <i>Eucalyptus wandoo</i>                            | South Africa. WESTERN CAPE: <b>3418 (Simons Town)</b> : Tokai main arboretum, (-AB), 18 Jul. 1983, <i>Poynton</i> 17787 (PRE).                                                                                                                                                                                                                                                                                                                                                                                                                                                         |
| <i>Fagus sylvatica</i>                              | KWAZULU-NATAL: <b>2929 (Underberg)</b> : Nottingham Road, Clifton Preparatory School, (-BD), 24 Feb. 2022, <i>Cheek</i> 3135 (NH).                                                                                                                                                                                                                                                                                                                                                                                                                                                     |
| <i>Ficus abutilifolia</i>                           | South Africa. GAUTENG: <b>2528 (Pretoria)</b> : Pretoria national botanic garden, (-CB), 26 Aug. 2021, <i>Cheek</i> 2999 (NH).                                                                                                                                                                                                                                                                                                                                                                                                                                                         |
| <i>Ficus benjamina</i>                              | South Africa. KWAZULU-NATAL: <b>2931 (Stanger)</b> : Tongaat, Amanzimnyama Garden, (-CA), 5 Aug. 2021, <i>Cheek</i> 3085 (NH).                                                                                                                                                                                                                                                                                                                                                                                                                                                         |
| <i>Ficus carica</i>                                 | South Africa. GAUTENG: <b>2528 (Pretoria)</b> : Pretoria, Austin Roberts bird sanctuary, (-CC), 27 Aug. 2021, <i>Cheek</i> 3023 (NH).                                                                                                                                                                                                                                                                                                                                                                                                                                                  |
| <i>Ficus burkei</i>                                 | South Africa. GAUTENG: <b>2528 (Pretoria)</b> : Pretoria, Springbok park, (-CA), 17 Mar. 2021, <i>Cheek</i> 2791 (NH); South Africa.                                                                                                                                                                                                                                                                                                                                                                                                                                                   |
| <i>Ficus elastica</i>                               | South Africa. EASTERN CAPE: <b>3224 (Graaff-Reinet)</b> : Graaff-Reinet, Reinet House, rear courtyard, (-BC), 17 Jun. 2021, <i>Cheek</i> 2937 (NH).                                                                                                                                                                                                                                                                                                                                                                                                                                    |
| <i>Ficus lyrata</i>                                 | South Africa. EASTERN CAPE: <b>3325 (Port Elizabeth)</b> : Uitenhage, Magennis Park, (-CD), 15 Jun. 2021, <i>Cheek</i> 2958 (NH).                                                                                                                                                                                                                                                                                                                                                                                                                                                      |
| <i>Ficus macrophylla</i>                            | South Africa. WESTERN CAPE: <b>3318 (Cape Town)</b> : Cape Town, Leeuwenhof estate, (-CD), 9 Jun. 2021, <i>Cheek</i> 2921 (NH); South Africa. <b>3418 (Simons Town)</b> : Tokai arboretum, tree no 283, (-AB), 7 Aug. 1962, <i>Poynton</i> 12723 (PRE).                                                                                                                                                                                                                                                                                                                                |
| <i>Ficus microcarpa</i>                             | WESTERN CAPE: <b>3318 (Cape Town)</b> : Leeuwenhof estate, (-CD), 9 June 2021, <i>Cheek</i> 2925 (NH); <b>3418 (Simons Town)</b> : Tokai arboretum, tree no 285, (-AB), 30 Dec. 1963, <i>Poynton</i> 13583 (PRE).                                                                                                                                                                                                                                                                                                                                                                      |
| <i>Ficus pumila</i>                                 | South Africa. GAUTENG: <b>2528 (Pretoria)</b> : Pretoria, Jan Cilliers Park, (-CC), 17 Mar. 2021, <i>Cheek</i> 2826 (NH).                                                                                                                                                                                                                                                                                                                                                                                                                                                              |
| <i>Ficus rubiginosa</i>                             | South Africa. WESTERN CAPE: <b>3418 (Simons Town)</b> : Tokai, main arboretum, tree no. 282, (-AB), 17 Feb. 1983, <i>Poynton</i> 17137 (PRE).                                                                                                                                                                                                                                                                                                                                                                                                                                          |
| <i>Ficus sycomorus</i>                              | South Africa. KWAZULU-NATAL: <b>2931 (Stanger)</b> : Durban, Jameson Park, (-CC), 25 Nov. 2021, <i>Cheek</i> 3110 (NH).                                                                                                                                                                                                                                                                                                                                                                                                                                                                |
| <i>Ficus watkinsiana</i>                            | South Africa. WESTERN CAPE: <b>3418 (Simons Town)</b> : Tokai, main arboretum, tree no. 1183, (-AB), 26 Feb. 1987, <i>Poynton</i> 20026 (PRE).                                                                                                                                                                                                                                                                                                                                                                                                                                         |
| <i>Flindersia breyleyana</i>                        | South Africa. LIMPOPO: <b>2329 (Pietersburg)</b> : Louis Trichardt, Hanglip arboretum, (-BB), 10 Sept. 2014, <i>Cheek</i> 2123 (NH); Louis Trichardt, Entabeni plantation Hill 20 extension, (-CD), 12 Sept. 2014, <i>Cheek</i> 2131 (NH); Entabeni plantation Hill 20 arboretum, (-CD), 12 Sept. 2014, <i>Cheek</i> 2137 (NH); <b>2330 (Tzaneen)</b> : Timbadola plantation arboretum plot 3, (-AA), 12 Aug. 1984, <i>Poynton</i> 18805 (PRE); MPUMALANGA: <b>2530 (Lydenburg)</b> : Sabie, Bergvliet plantation, D.R. de Wet arboretum, (-BB), 13 Jul. 2014, <i>Cheek</i> 2059 (NH). |
| <i>Fraxinus angustifolia</i>                        | South Africa. MPUMALANGA: <b>2530 (Lydenburg)</b> : Belfast arboretum plot 50, (-CA), 2 Apr. 1922, <i>Kotze</i> 4097 (PRE); FREE STATE: <b>2926 (Bloemfontein)</b> : Bloemfontein, Happy Valley conservation area, (-AA), 30 Dec. 2019, <i>Cheek</i> 2748 (NH); WESTERN CAPE: <b>3418 (Simons Town)</b> : Tokai, main arboretum, tree 234, (-AB), Aug. 1962, <i>Poynton</i> 12665 (PRE).                                                                                                                                                                                               |
| <i>Fraxinus excelsior</i>                           | South Africa. GAUTENG: <b>2528 (Pretoria)</b> : Pretoria national zoo, (-CA), 24 Aug. 2021, <i>Cheek</i> 2986 (NH); MPUMALANGA: <b>2629 (Bethal)</b> : Standerton arboretum, (-CC), Jan. 1914, <i>Robertson</i> 1590 (PRE).                                                                                                                                                                                                                                                                                                                                                            |
| <i>Fraxinus pennsylvanica</i>                       | South Africa. MPUMALANGA: <b>2530 (Lydenburg)</b> : Belfast arboretum plot 64, (-CA), 14 Nov. 1969, <i>Forester</i> 14008 (PRE).                                                                                                                                                                                                                                                                                                                                                                                                                                                       |
| <i>Fraxinus velutina</i>                            | South Africa. GAUTENG: <b>2528 (Pretoria)</b> : Pretoria, Irene Dairy Farm arboretum, (-CC), 21 Mar. 2021, <i>Cheek</i> 2847 (NH).                                                                                                                                                                                                                                                                                                                                                                                                                                                     |
| <i>Gardenia volkensii</i>                           | South Africa. Limpopo: <b>2329 (Pietersburg)</b> : Louis Trichardt, Tree park, (-CC), 24 Mar. 2021, <i>Cheek</i> 2870 (NH).                                                                                                                                                                                                                                                                                                                                                                                                                                                            |
| <i>Ginkgo biloba</i>                                | South Africa. KWAZULU-NATAL: <b>2930 (Pietermaritzburg)</b> : Pietermaritzburg, Msunduzi museum, (-CB), 23 Nov. 2021, <i>Cheek</i> 3091 (NH); EASTERN CAPE: <b>3226 (Fort Beaufort)</b> : Hogsback arboretum, (-DB), 22 Nov. 1967, <i>Kirkman</i> 3086 (PRE).                                                                                                                                                                                                                                                                                                                          |

|                                   |                                                                                                                                                                                                                                                                                                                                                                                                                                                |
|-----------------------------------|------------------------------------------------------------------------------------------------------------------------------------------------------------------------------------------------------------------------------------------------------------------------------------------------------------------------------------------------------------------------------------------------------------------------------------------------|
| <i>Gleditsia triacanthos</i>      | South Africa. FREE STATE: <b>2926 (Bloemfontein)</b> : Bloemfontein arboretum, (-AA), 5 Nov. 1924, <i>Pretorius 3214</i> (PRE).                                                                                                                                                                                                                                                                                                                |
| <i>Gliricidia sepium</i>          | South Africa. KWAZULU-NATAL: <b>2832 (Mtubatuba)</b> : Kwambonambi forestry station arboretum plot A2, (-AC), 15 Oct. 1992, <i>Glen 3147</i> (PRE).                                                                                                                                                                                                                                                                                            |
| <i>Grevillea banksia</i>          | South Africa. WESTERN CAPE: <b>3418 (Simons Town)</b> : Tokai arboretum, (-AB), 7 Jan. 1956, <i>Taylor 1631</i> (PRE).                                                                                                                                                                                                                                                                                                                         |
| <i>Grevillea robusta</i>          | South Africa. MPUMALANGA: <b>2530 (Lydenburg)</b> : Nelspruit, White River, along the R537, close to old Bultfontein arboretum, (-BB), 14 Jul. 2014, <i>Cheek 2064</i> (NH). WESTERN CAPE: <b>3323 (Willowmore)</b> : Storms River, Lottering plantation, Bloukrans arboretum, (-DC), 16 May, 2013, <i>Cheek 1693</i> (NH). EASTERN CAPE: <b>3325 (Port Elizabeth)</b> : Groendal nature reserve, (-CB), 21 Nov. 2014, <i>Cheek 2254</i> (NH). |
| <i>Gonioma kamassi</i>            | South Africa. EASTERN CAPE: <b>3325 (Port Elizabeth)</b> : Port Elizabeth, St. George's Park, (-DC), 15 Jun. 2021, <i>Cheek 2941</i> (NH).                                                                                                                                                                                                                                                                                                     |
| <i>Halleria lucida</i>            | South Africa. LIMPOPO: <b>2330 (Tzaneen)</b> : Tzaneen, JDM Keet arboretum, (-CA), 19 Sept. 2019, <i>Cheek 2666</i> (PRE); WESTERN CAPE: <b>3418 (Simons Town)</b> : Tokai main arboretum, tree no. 1265 (-AB), Oct. 1962, <i>Poynton 12617</i> (PRE).                                                                                                                                                                                         |
| <i>Handroanthus chrysotrichus</i> | South Africa. KWAZULU-NATAL: <b>2930 (Pietermaritzburg)</b> : Pinetown, Japanese Gardens, (-DD), 3 Dec. 2020, <i>Cheek 2973</i> (NH).                                                                                                                                                                                                                                                                                                          |
| <i>Heteropyxis natalensis</i>     | South Africa. GAUTENG: <b>2528 (Pretoria)</b> : Pretoria, Springbok park, (-CA), 17 Mar. 2021, <i>Cheek 2797</i> (NH).                                                                                                                                                                                                                                                                                                                         |
| <i>Hovenia dulcis</i>             | South Africa. GAUTENG: <b>2528 (Pretoria)</b> : University of Pretoria, Hillcrest campus, (-CA), 22 Mar. 2021, <i>Cheek 2858</i> (NH).                                                                                                                                                                                                                                                                                                         |
| <i>Hymenosporum flavum</i>        | South Africa. KWAZULU-NATAL: <b>2931 (Stanger)</b> : Tongaat, Amanzimnyama Gardens, (-CA), 29 Oct. 2021, <i>Cheek 3115</i> (NH). <b>2930 (Pietermaritzburg)</b> : Howick, Benvie arboretum, (-AD), 28 Oct. 2015, <i>Cheek 2396</i> (NH); Pietermaritzburg, KZN botanical gardens, (-CB), 24 Jan. 2020, <i>Cheek 2761</i> (NH).                                                                                                                 |
| <i>Hyperacanthus amoenus</i>      | South Africa. GAUTENG: <b>2628 (Johannesburg)</b> : Houghton, The Wilds, (-AA), 30 Nov. 1984, <i>McMurtry 5642</i> (JBG).                                                                                                                                                                                                                                                                                                                      |
| <i>Hypericum roeperianum</i>      | South Africa. GAUTENG: <b>2528 (Pretoria)</b> : Pretoria national botanic garden, (-CB), 25 Aug. 2021, <i>Cheek 3119</i> (NH).                                                                                                                                                                                                                                                                                                                 |
| <i>Ilex aquifolium</i>            | South Africa. GAUTENG: <b>2528 (Pretoria)</b> : Pretoria, Irene Dairy Farm arboretum, (-CC), 21 Mar. 2021, <i>Cheek 2842</i> (NH); EASTERN CAPE: <b>3226 (Fort Beaufort)</b> : Hogsback, Hogsback arboretum, (-DB), 18 Nov. 2014, <i>Cheek 2239</i> (NH).                                                                                                                                                                                      |
| <i>Ilex cornuta</i>               | KWAZULU-NATAL: <b>2929 (Underberg)</b> : Nottingham Road, Clifton Preparatory School, (-BD), 24 Feb. 2022, <i>Cheek 3133</i> (NH); <b>2930 (Pietermaritzburg)</b> : Durban, Hillcrest, Makaranga Gardens, (-DD), 4 Jun. 2019, <i>Cheek 2653</i> (NH).                                                                                                                                                                                          |
| <i>Ilex mitis</i>                 | South Africa. LIMPOPO: <b>2329 (Tzaneen)</b> : Magoebaskloof, Cheerio Gardens, (-CC), 25 Mar. 2021, <i>Cheek 2881</i> (NH).                                                                                                                                                                                                                                                                                                                    |
| <i>Ixora coccinea</i>             | South Africa. KWAZULU-NATAL: <b>2931 (Stanger)</b> : Tongaat, Amanzimnyama Garden, (-CA), 5 Aug. 2021, <i>Cheek 3081</i> (NH).                                                                                                                                                                                                                                                                                                                 |
| <i>Jatropha curcas</i>            | South Africa. NORTH WEST: <b>2527 (Rustenburg)</b> : Rustenburg, Sun City triangle palm garden, (-AC), 20 Mar. 2021, <i>Cheek 2829</i> (NH).                                                                                                                                                                                                                                                                                                   |
| <i>Juglans ailantifolia</i>       | South Africa. MPUMALANGA: <b>2530 (Lydenburg)</b> : Belfast arboretum, (-CA), Apr. 1922, <i>Robertson 4427</i> (PRE).                                                                                                                                                                                                                                                                                                                          |
| <i>Juglans mandschurica</i>       | KWAZULU-NATAL: <b>2929 (Underberg)</b> : Nottingham Road, Clifton Preparatory School, (-BD), 24 Feb. 2022, <i>Cheek 3124</i> (NH).                                                                                                                                                                                                                                                                                                             |
| <i>Juniperus bermudiana</i>       | South Africa. WESTERN CAPE: <b>3418 (Simons Town)</b> : Tokai arboretum, compartment A5 block 10, (-AB), n.d., <i>Walsh 19918</i> (PRE).                                                                                                                                                                                                                                                                                                       |
| <i>Juniperus brevifolia</i>       | South Africa. MPUMALANGA: <b>2630 (Carolina)</b> : Ermelo, Chrissiesmeer, Jessievale arboretum, (-BB), 17 Jul. 2014, <i>Cheek 2086</i> (NH).                                                                                                                                                                                                                                                                                                   |
| <i>Juniperus cedrus</i>           | South Africa. WESTERN CAPE: <b>3418 (Simons Town)</b> : Tokai arboretum, tree no. 23, (-AB), 6 Aug. 1962, <i>Poynton 12606</i> (PRE).                                                                                                                                                                                                                                                                                                          |

|                                |                                                                                                                                                                                                                                                                                                                                                                                                                                                                                                                                                                                                                                                                                                                                                          |
|--------------------------------|----------------------------------------------------------------------------------------------------------------------------------------------------------------------------------------------------------------------------------------------------------------------------------------------------------------------------------------------------------------------------------------------------------------------------------------------------------------------------------------------------------------------------------------------------------------------------------------------------------------------------------------------------------------------------------------------------------------------------------------------------------|
| <i>Juniperus communis</i>      | South Africa. KWAZULU-NATAL: <b>2929 (Underberg)</b> : Himeville, Kenmo Lake arboretum, (-DA), 15 Sept. 2021, <i>Cheek 3054</i> (NH).                                                                                                                                                                                                                                                                                                                                                                                                                                                                                                                                                                                                                    |
| <i>Juniperus formosana</i>     | South Africa. WESTERN CAPE: <b>3418 (Simons Town)</b> : Tokai arboretum, (-AB), 29 Apr. 1953, <i>Taylor 759</i> (PRE).                                                                                                                                                                                                                                                                                                                                                                                                                                                                                                                                                                                                                                   |
| <i>Juniperus oxycedrus</i>     | South Africa. LIMPOPO: <b>2330 (Tzaneen)</b> : Woodbush arboretum, (-CC), 24 Oct. 1917, <i>Kotze 2510</i> (PRE).                                                                                                                                                                                                                                                                                                                                                                                                                                                                                                                                                                                                                                         |
| <i>Juniperus virginiana</i>    | South Africa. LIMPOPO: <b>2330 (Tzaneen)</b> : Middelkop lower arboretum, (-CC), Feb. 1963, <i>Poynton 12790</i> (PRE); GAUTENG: <b>2528 (Pretoria)</b> : Pretoria, University of Pretoria Hillcrest campus, (-CB), 28 Aug. 2021, <i>Cheek 3044</i> (NH); MPUMALANGA: <b>2530 (Lydenburg)</b> : Belfast arboretum plot 38, (-CA), 2 May 1985, <i>Anon. 1205</i> (PRE); FREE STATE: <b>2827 (Senekal)</b> : Senekal, NG Church garden, (-BC), 16 May 2021, <i>Cheek 2906</i> (NH); KWAZULU-NATAL: <b>2929 (Underberg)</b> : Himeville, Kenmo Lake arboretum, (-DA), 15 Sept. 2021, <i>Cheek 3055</i> (NH); WESTERN CAPE: <b>3418 (Simons Town)</b> : Cape Town, Tokai arboretum, next to Lister's tea room, (-AB), 22 Mar. 2018, <i>Cheek 2710</i> (NBG). |
| <i>Karomia speciosa</i>        | South Africa. MPUMALANGA: <b>2531 (Komatipoort)</b> : Kruger National Park, Skukuza arboretum, (-DC), 09 Nov. 1990, <i>Zambatis 81</i> (KNP).                                                                                                                                                                                                                                                                                                                                                                                                                                                                                                                                                                                                            |
| <i>haya anthotheca</i>         | South Africa. Limpopo: <b>2329 (Pietersburg)</b> : Louis Trichardt, Palm Park, (-BB), 24 Mar. 2021, <i>Cheek 2888</i> (NH); GAUTENG: <b>2528 (Pretoria)</b> : Pretoria national botanic garden, (-CB), 26 Aug. 2021, <i>Cheek 3008</i> (NH).                                                                                                                                                                                                                                                                                                                                                                                                                                                                                                             |
| <i>Khaya senegalensis</i>      | South Africa. KWAZULU-NATAL: <b>2832 (Mtubatuba)</b> : Kwambonambi arboretum, (-CA), Oct. 1970, <i>Stephens 42400</i> (PRE).                                                                                                                                                                                                                                                                                                                                                                                                                                                                                                                                                                                                                             |
| <i>Kigelia africana</i>        | South Africa. Limpopo: <b>2329 (Pietersburg)</b> : Louis Trichardt, Tree Park, (-BB), 24 Mar. 2021, <i>Cheek 2903</i> (NH).                                                                                                                                                                                                                                                                                                                                                                                                                                                                                                                                                                                                                              |
| <i>Koelreuteria paniculata</i> | South Africa. LIMPOPO: <b>2229 (Waterpoort)</b> : Hanglip arboretum, (-DD), Feb. 1952, <i>Van Rensburg 10443</i> (PRE).                                                                                                                                                                                                                                                                                                                                                                                                                                                                                                                                                                                                                                  |
| <i>Laburnum anagyroides</i>    | South Africa. FREE STATE: <b>2926 (Bloemfontein)</b> : Bloemfontein arboretum, (-AA), 5 Nov. 1924, <i>Potts 3218</i> (PRE).                                                                                                                                                                                                                                                                                                                                                                                                                                                                                                                                                                                                                              |
| <i>Lagerstroemia indica</i>    | South Africa. FREE STATE: <b>2827 (Senekal)</b> : Senekal, NG church garden, (-BC), 16 May 2021, <i>Cheek 2916</i> (NH).                                                                                                                                                                                                                                                                                                                                                                                                                                                                                                                                                                                                                                 |
| <i>Lagunaria patersonia</i>    | South Africa. KWAZULU-NATAL: <b>2930 (Pietermaritzburg)</b> : Pietermaritzburg, KZN botanical gardens, (-CB), 25 Jan. 2020, <i>Cheek 2758</i> (NH); WESTERN CAPE: <b>3318 (Cape Town)</b> : Cape Town, Leeuwenhof estate, (-CD), 9 June 2021, <i>Cheek 2924</i> (NH).                                                                                                                                                                                                                                                                                                                                                                                                                                                                                    |
| <i>Ligustrum sinense</i>       | South Africa. LIMPOPO: <b>2329 (Tzaneen)</b> : Magoebaskloof, Cheerio Gardens, (-CC), 25 Mar. 2021, <i>Cheek 2885</i> (NH); GAUTENG: <b>2528 (Pretoria)</b> : Austin Roberts Bird Sanctuary, (-CC), 27 Aug. 2021, <i>Cheek 3071</i> (NH).                                                                                                                                                                                                                                                                                                                                                                                                                                                                                                                |
| <i>Lippia javanica</i>         | South Africa. GAUTENG: 2528 (Pretoria): Pretoria national botanic garden, Arboretum section, (-CB), 26 Aug. 2021, <i>Cheek 2981</i> (NH).                                                                                                                                                                                                                                                                                                                                                                                                                                                                                                                                                                                                                |
| <i>Liquidambar styraciflua</i> | South Africa. LIMPOPO: <b>2329 (Pietersburg)</b> : Haenertsburg, Sequoia Stay Gardens, (-DD), 20 Sept. 2019, <i>Cheek 2669</i> (PRE); MPUMALANGA: <b>2530 (Lydenburg)</b> : Sabie, Bergvliet plantation, D.R. de Wet arboretum, (-BB), 9 Jul. 2014, <i>Cheek 2032</i> (NH); KWAZULU-NATAL: <b>2930 (Pietermaritzburg)</b> : Cedara arboretum, (-CB), 13 Mar. 2012, <i>Cheek 1238</i> (NH); <b>3029 (Kokstad)</b> : Weza For. Res. Arboretum plot K3, (-DA), 9 Feb. 1982, <i>Quicke 5</i> (PRE).                                                                                                                                                                                                                                                          |
| <i>Livistona chinensis</i>     | South Africa. GAUTENG: <b>2528 (Pretoria)</b> : University of Pretoria, Main campus, (-CC), 28 Aug. 2021, <i>Cheek 3040</i> (NH).                                                                                                                                                                                                                                                                                                                                                                                                                                                                                                                                                                                                                        |
| <i>Liriodendron tulipifera</i> | South Africa. KWAZULU-NATAL: <b>2929 (Underberg)</b> : Himeville, Kenmo Lake arboretum, (-DA), 2 Mar. 2021, <i>Cheek 2778</i> (NH); Nottingham Road, Clifton Preparatory School, (-BD), 24 Feb. 2022, <i>Cheek 3127</i> (NH).                                                                                                                                                                                                                                                                                                                                                                                                                                                                                                                            |
| <i>Lophostemon confertus</i>   | South Africa. MPUMALANGA: <b>2530 (Lydenburg)</b> : Sabie, D.R. de Wet For. Res. Sta. arboretum, (-BB), 26 Nov. 1972, <i>Kruger 6</i> (GLOW); WESTERN CAPE: <b>3322 (Oudtshoorn)</b> : Kleinplaat arboretum plot 35, (-DC), n.d., <i>Lange 13309</i> (PRE).                                                                                                                                                                                                                                                                                                                                                                                                                                                                                              |
| <i>Loxostylis alata</i>        | South Africa. GAUTENG: <b>2528 (Pretoria)</b> : Pretoria, Jan Cilliers park, (-CC), 17 Mar. 2021, <i>Cheek 2825</i> (NH).                                                                                                                                                                                                                                                                                                                                                                                                                                                                                                                                                                                                                                |
| <i>Mackaya bella</i>           | South Africa. GAUTENG: <b>2628 (Johannesburg)</b> : Houghton, The Wilds, (-AA), 2 Dec. 1968, <i>Jooste 1679</i> (JBG).                                                                                                                                                                                                                                                                                                                                                                                                                                                                                                                                                                                                                                   |



|                                     |                                                                                                                                                                                                                                                                                                                                                        |
|-------------------------------------|--------------------------------------------------------------------------------------------------------------------------------------------------------------------------------------------------------------------------------------------------------------------------------------------------------------------------------------------------------|
| <i>Magnolia x soulangeana</i>       | South Africa. GAUTENG: <b>2528 (Pretoria)</b> : Pretoria national zoo, (-CA), 24 Aug. 2021, <i>Cheek</i> 3089 (NH); KWAZULU-NATAL: <b>2930 (Pietermaritzburg)</b> : Pietermaritzburg, KZN botanical gardens, (-CB), 25 Aug. 2015, <i>Cheek</i> 2351 (NH).                                                                                              |
| <i>Mahonia oiwakensis</i>           | South Africa. GAUTENG: <b>2528 (Pretoria)</b> : University of Pretoria, Hillcrest campus, (-CB), 28 Aug. 2021, <i>Cheek</i> 3039 (NH).                                                                                                                                                                                                                 |
| <i>Malus floribunda</i>             | LIMPOPO: <b>2329 (Tzaneen)</b> : Magoebaskloof, Cheerio Gardens, (-CC), 25 Mar. 2021, <i>Cheek</i> 2898 (NH).                                                                                                                                                                                                                                          |
| <i>Malus hupehensis</i>             | South Africa. LIMPOPO: <b>2329 (Tzaneen)</b> : Magoebaskloof, Cheerio Gardens, (-CC), 25 Mar. 2021, <i>Cheek</i> 2884 (NH). South Africa. KWAZULU-NATAL: <b>2929 (Underberg)</b> : Himeville, Kenmo Lake arboretum, (-DA), 15 Sept. 2021, <i>Cheek</i> 3051 (NH).                                                                                      |
| <i>Manilkara discolor</i>           | South Africa. KWAZULU-NATAL: <b>2931 (Stanger)</b> : Durban, Mitchell Park, (-CC), 25 Nov. 2021, <i>Cheek</i> 3113 (NH).                                                                                                                                                                                                                               |
| <i>Manoao colensoi</i>              | South Africa. FREE STATE: <b>2926 (Bloemfontein)</b> : Bloemfontein arboretum nursery, (-AA), 9 Feb. 1915, Brimacombe 1808 (PRE).                                                                                                                                                                                                                      |
| <i>Melaleuca armillaris</i>         | South Africa. WESTERN CAPE: <b>3418 (Simons Town)</b> : Tokai main arboretum, (-AB), Oct. 1953, <i>Van Rensburg</i> 11793 (PRE).                                                                                                                                                                                                                       |
| <i>Melaleuca cuticularis</i>        | South Africa. WESTERN CAPE: <b>3418 (Simons Town)</b> : Tokai main arboretum, (-AB), 10 May 1984, <i>Poynton</i> 18469 (PRE).                                                                                                                                                                                                                          |
| <i>Melaleuca diosmifolia</i>        | South Africa. WESTERN CAPE: <b>3418 (Simons Town)</b> : Tokai, Flagstaff arboretum, (-AB), Oct. 1962, <i>Poynton</i> 12661 (PRE).                                                                                                                                                                                                                      |
| <i>Melaleuca linariifolia</i>       | South Africa. WESTERN CAPE: <b>3418 (Simons Town)</b> : Tokai main arboretum, tree no. 1004, (-AB), Oct. 1962, <i>Poynton</i> 12753 (PRE).                                                                                                                                                                                                             |
| <i>Melaleuca quinquenervia</i>      | South Africa. KWAZULU-NATAL: <b>2931 (Stanger)</b> : Durban, Jameson Park, (-CC), 25 Nov. 2021, <i>Cheek</i> 3111 (NH), <b>3030 (Port Shepstone)</b> : Uvongo, Skyline Arboretum, (-CD), 3 Mar. 2022, <i>Cheek</i> 3138 (NH); EASTERN CAPE: <b>3325 (Port Elizabeth)</b> : Port Elizabeth, Victoria Park, (-DC), 14 Jun. 2021, <i>Cheek</i> 2952 (NH). |
| <i>Melaleuca styphelioides</i>      | KWAZULU-NATAL: <b>3030 (Port Shepstone)</b> : Uvongo, Skyline Arboretum, (-CD), 3 Mar. 2022, <i>Cheek</i> 3142 (NH).                                                                                                                                                                                                                                   |
| <i>Melia azedarach</i>              | South Africa. GAUTENG: <b>2528 (Pretoria)</b> : Irene dairy farm, (-CC), 21 Mar. 2021, <i>Cheek</i> 2855 (NH).                                                                                                                                                                                                                                         |
| <i>Metasequoia glyptostroboides</i> | South Africa. KWAZULU-NATAL: <b>2930 (Pietermaritzburg)</b> : Howick, Benvie arboretum, (-AC), 23 Nov. 2021, <i>Cheek</i> 3094 (NH); Durban, Pinetown, Japanese Garden, (-DD), 25 Nov. 2021, <i>Cheek</i> 3105 (NH); WESTERN CAPE: <b>3318 (Cape Town)</b> : Kirstenbosch botanical garden, (-CD), 25 Apr. 1960, <i>Anon. s.n.</i> (NBG).              |
| <i>Metrosideros excelsa</i>         | WESTERN CAPE: <b>3318 (Cape Town)</b> : Leeuwenhof estate, (-CD), 9 June 2021, <i>Cheek</i> 2929 (NH).                                                                                                                                                                                                                                                 |
| <i>Millettia dura</i>               | South Africa. KWAZULU-NATAL: <b>2931 (Stanger)</b> : Durban, Mitchell Park, (-CC), 25 Nov. 2021, <i>Cheek</i> 3112 (NH).                                                                                                                                                                                                                               |
| <i>Mimusops caffra</i>              | South Africa. EASTERN CAPE: <b>3325 (Port Elizabeth)</b> : Port Elizabeth, Victoria Park, (-DC), 14 Jun. 2021, <i>Cheek</i> 2950 (NH).                                                                                                                                                                                                                 |
| <i>Mimusops obtusifolia</i>         | South Africa. LIMPOPO: <b>2329 (Pietersburg)</b> : Hanglip arboretum, (-BB), 8 Jun. 1986, <i>Poynton</i> 19784 (PRE).                                                                                                                                                                                                                                  |
| <i>Mitriostigma axillare</i>        | EASTERN CAPE: <b>3129 (Port St. Johns)</b> : (-BC), Ntsubane plantation arboretum, 21 Aug. 1962, <i>Haigh</i> 2283 (PRE).                                                                                                                                                                                                                              |
| <i>Mystroxydon aethiopicum</i>      | South Africa. GAUTENG: <b>2528 (Pretoria)</b> : Pretoria national botanic garden, (-CB), 27 Aug. 2021, <i>Cheek</i> 3007 (NH).                                                                                                                                                                                                                         |
| <i>Morus alba</i>                   | GAUTENG: <b>2528 (Pretoria)</b> : University of Pretoria Hillcrest campus, (-CA), 28 Aug. 2021, <i>Cheek</i> 3068 (NH); Austin Roberts bird sanctuary, (-CC), 27 Aug. 2021, <i>Cheek</i> 3118 (NH).                                                                                                                                                    |
| <i>Mundulea sericea</i>             | South Africa. GAUTENG: <b>2528 (Pretoria)</b> : University of Pretoria Hatfield campus, (-),                                                                                                                                                                                                                                                           |
| <i>Murraya paniculata</i>           | South Africa. KWAZULU-NATAL: <b>2931 (Stanger)</b> : Tongaat, Amanzimnyama Gardens, (-CA), 29 Jul. 2021, <i>Cheek</i> 2969 (NH).                                                                                                                                                                                                                       |

|                                              |                                                                                                                                                                                                                                                                             |
|----------------------------------------------|-----------------------------------------------------------------------------------------------------------------------------------------------------------------------------------------------------------------------------------------------------------------------------|
| <i>Mussaenda erythrophylla</i>               | South Africa. KWAZULU-NATAL: <b>2930 (Pietermaritzburg)</b> : Durban, Pinetown, Japanese Garden, (-DD), 25 Nov. 2021, <i>Cheek</i> 3106 (NH); <b>2931 (Stanger)</b> : Tongaat, Amanzimnyama Garden, (-CA), 5 Aug. 2021, <i>Cheek</i> 3083 (NH).                             |
| <i>Myrtus communis</i>                       | South Africa. FREE STATE: <b>2827 (Senekal)</b> : Senekal, NG church garden, (-BC), 16 May 2021, <i>Cheek</i> 2917 (NH); WESTERN CAPE: <b>3318 (Cape Town)</b> : Cape Town, Leeuwenhof estate, (-CD), 9 June 2021, <i>Cheek</i> 2919 (NH).                                  |
| <i>Nerium oleander</i>                       | South Africa. FREE STATE: <b>2827 (Senekal)</b> : Senekal, NG church garden, (-BC), 16 May 2021, <i>Cheek</i> 2904 (NH).                                                                                                                                                    |
| <i>Nuxia floribunda</i>                      | South Africa. GAUTENG: <b>2528 (Pretoria)</b> : Pretoria, Springbok park, (-CA), 17 Mar. 2021, <i>Cheek</i> 2789 (NH); Pretoria National Botanic Garden, (-CB), 26 Aug. 2021, <i>Cheek</i> 2986 (NH).                                                                       |
| <i>Nyssa sylvatica</i>                       | South Africa. KWAZULU-NATAL: <b>2929 (Underberg)</b> : Himeville, Kenmo Lake arboretum, (-DA), 2 Mar. 2021, <i>Cheek</i> 2776 (NH).                                                                                                                                         |
| <i>Ochna serrulata</i>                       | South Africa. GAUTENG: <b>2528 (Pretoria)</b> : Pretoria national botanic garden, Arboretum section, (-CB), 23 Aug. 2021, <i>Cheek</i> 2979 (NH).                                                                                                                           |
| <i>Ocotea porosa</i>                         | South Africa. LIMPOPO: <b>2329 (Pietersburg)</b> : Louis Trichardt, Entabeni plantation, (-AA), 12 Sept. 2014, <i>Cheek</i> 2132 (NH).                                                                                                                                      |
| <i>Olea capensis</i> subsp. <i>capensis</i>  | South Africa. GAUTENG: <b>2528 (Pretoria)</b> : Pretoria, Springbok park, (-CA), 17 Mar. 2021, <i>Cheek</i> 2790 (NH).                                                                                                                                                      |
| <i>Olea europaea</i> subsp. <i>cuspidata</i> | South Africa. GAUTENG: <b>2528 (Pretoria)</b> : Irene, Anglo-Boer war cemetery, (-CC), 26 Jul. 2013, <i>Cheek</i> 2022 (NH).                                                                                                                                                |
| <i>Olinia ventosa</i>                        | South Africa. WESTERN CAPE: <b>3419 (Caledon)</b> : Grabouw, Elgin, Fruitways farm, Eikenhof arboretum, (-AA), 11 Jun. 2021, <i>Cheek</i> 2936 (NH).                                                                                                                        |
| <i>Oncoba spinosa</i>                        | South Africa. Limpopo: <b>2329 (Pietersburg)</b> : Louis Trichardt, Tree Park, (-BB), 24 Mar. 2021, <i>Cheek</i> 2873 (NH).                                                                                                                                                 |
| <i>Pandanus utilis</i>                       | South Africa. LIMPOPO: <b>2330 (Tzaneen)</b> : Modjajis Kloof, remnant of Louis Botha Park, 25 Mar. 2021, <i>Cheek</i> 2889 (NH).                                                                                                                                           |
| <i>Pappea capensis</i>                       | GAUTENG: <b>2528 (Pretoria)</b> : Pretoria, Jan Cilliers Park, (-CC), 17 Mar. 2021, <i>Cheek</i> 2865 (NH).                                                                                                                                                                 |
| <i>Parkinsonia aculeata</i>                  | South Africa. FREE STATE: <b>2926 (Bloemfontein)</b> : Bloemfontein arboretum, (-AA), Nov. 1922, <i>Gemmell</i> 3360 (BLFU).                                                                                                                                                |
| <i>Paulownia tomentosa</i>                   | South Africa. LIMPOPO: <b>2329 (Tzaneen)</b> : Magoebaskloof, Cheerio Gardens, (-CC), 25 Mar. 2021, <i>Cheek</i> 2876 (NH); KWAZULU-NATAL: <b>2929 (Underberg)</b> : Himeville, Kenmo Lake arboretum, (-DA), 15 Sept. 2021, <i>Cheek</i> 3063 (NH).                         |
| <i>Pavetta natalensis</i>                    | EASTERN CAPE: <b>3129 (Port St. Johns)</b> : (-BC), Ntsubane plantation arboretum, 18 Aug. 1962, <i>Haigh</i> 2280 (PRE).                                                                                                                                                   |
| <i>Pereskia grandifolia</i>                  | South Africa. NORTH WEST: <b>2527 (Rustenburg)</b> : Rustenburg, Sun City triangle palm garden, (-AC), 20 Mar. 2021, <i>Cheek</i> 2831 (NH); South Africa. KWAZULU-NATAL: <b>2931 (Stanger)</b> : Tongaat, Amanzimnyama Garden, (-CA), 5 Aug. 2021, <i>Cheek</i> 3080 (NH). |
| <i>Persea americana</i>                      | South Africa. LIMPOPO: <b>2329 (Pietersburg)</b> : Louis Trichardt, Entabeni plantation, Hill 20 arboretum, (-AA), 12 Sept. 2014, <i>Cheek</i> 2136 (NH).                                                                                                                   |
| <i>Phytolacca dioica</i>                     | South Africa. EASTERN CAPE: <b>3327 (Peggie)</b> : East London, Queens Park Zoo, (-BB), 16 June 2021, <i>Cheek</i> 2946 (NH).                                                                                                                                               |
| <i>Picea abies</i>                           | EASTERN CAPE: <b>3227 (Stutterheim)</b> : Kubusie plantation, Evelyn Valley arboretum, (-CA), 12 Feb. 2016, <i>Cheek</i> 2477 (NH).                                                                                                                                         |
| <i>Picea smithiana</i>                       | South Africa. WESTERN CAPE: <b>3418 (Simons Town)</b> : Tokai main arboretum, tree no. 746, (-AB), Oct. 1962, <i>Poynton</i> 12711 (PRE); EASTERN CAPE: <b>3128 (Umtata)</b> : (-BA), Ntywenka plantation arboretum plot 1, 16 Aug. 1962, <i>Haigh</i> 2278 (PRE).          |
| <i>Pinanga coronata</i>                      | KWAZULU-NATAL: <b>2931 (Stanger)</b> : Tongaat, Amanzimnyama Garden, (-CA), 5 Aug. 2021, <i>Cheek</i> 3082 (NH).                                                                                                                                                            |
| <i>Pinus arizonica</i>                       | South Africa. MPUMALANGA: <b>2629 (Bethal)</b> : Ermelo, Nooitgedacht stud farm, site of old Ermelo arboretum, (-DB), 18 Jul. 2014, <i>Cheek</i> 2087 (NH); <b>2530 (Lydenburg)</b> : Belfast arboretum plot 58, (-CA), 2 May 1983, <i>Anon.</i> 17699 (PRE).               |

|                          |                                                                                                                                                                                                                                                                                                                                                                                                                                                                                 |
|--------------------------|---------------------------------------------------------------------------------------------------------------------------------------------------------------------------------------------------------------------------------------------------------------------------------------------------------------------------------------------------------------------------------------------------------------------------------------------------------------------------------|
| <i>Pinus attenuata</i>   | South Africa. WESTERN CAPE: <b>3418 (Simons Town)</b> : Tokai arboretum, (-AB), 16 Mar. 1906, <i>Anon. 1182</i> (PRE); <b>3325 (Port Elizabeth)</b> : Suurborg plantation arboretum plot 38a, (-BC), Jun. 1963, <i>Poynton 12867</i> (PRE).                                                                                                                                                                                                                                     |
| <i>Pinus ayacahuite</i>  | EASTERN CAPE: <b>3128 (Umtata)</b> : (-BA), Ntywenka arboretum plot 2, Jul. 1959, <i>Anon. 11425</i> (PRE).                                                                                                                                                                                                                                                                                                                                                                     |
| <i>Pinus banksiana</i>   | South Africa. WESTERN CAPE: <b>3323 (Willowmore)</b> : Buffelsnek arboretum, (-CC), 9 Apr. 1934, <i>Laughton 8584</i> (PRE).                                                                                                                                                                                                                                                                                                                                                    |
| <i>Pinus canariensis</i> | South Africa. GAUTENG: <b>2528 (Pretoria)</b> : Groenkloof nature reserve, Groenkloof arboretum, (-CC), 29 Jul. 2013, <i>Cheek 2023</i> (NH). WESTERN CAPE: <b>3322 (Oudtshoorn)</b> : Swartberg pass, Toll house arboretum site, (-AC), 22 Oct. 2013, <i>Cheek 1872</i> (NH); De Wet's Vlei arboretum site, <i>Cheek 1876</i> (NH). EASTERN CAPE: <b>3227 (Stutterheim)</b> : Kubusie plantation, Evelyn Valley arboretum, 13 Jan. 2013, <i>Cheek 1543</i> (NH).               |
| <i>Pinus caribaea</i>    | South Africa. KWAZULU-NATAL: <b>2832 (Mtubatuba)</b> : Kwambonambi plantation arboretum plot A16, (-AC), 24 Nov. 1959, <i>Taylor 2446</i> (PRE).                                                                                                                                                                                                                                                                                                                                |
| <i>Pinus cembroides</i>  | South Africa. MPUMALANGA: <b>2530 (Lydenburg)</b> : Belfast state forest arboretum plot 27, (-CA), 13 Sept. 1983, <i>Bailey 17894</i> (PRE); <b>2629 (Bethal)</b> : Ermelo, old arboretum plot 53a, (-DB), 11 Sept. 1931, <i>Robertson 7881</i> (PRE); WESTERN CAPE: <b>3418 (Simons Town)</b> : Tokai, plot 37 in arboretum A5c, (-AB), 11 Sept. 1931, <i>Clayton 7899</i> (PRE).                                                                                              |
| <i>Pinus contorta</i>    | South Africa. MPUMALANGA: <b>2530 (Lydenburg)</b> : Belfast arboretum plot 10, (-CA), 25 Jan. 1913, <i>Robertson 1161</i> (PRE);                                                                                                                                                                                                                                                                                                                                                |
| <i>Pinus coulteri</i>    | South Africa. WESTERN CAPE: <b>3322 (Oudtshoorn)</b> : Kleinplaat arboretum plot 49, (-DC), n.d., <i>Lange 13587</i> (PRE).                                                                                                                                                                                                                                                                                                                                                     |
| <i>Pinus densiflora</i>  | South Africa. LIMPOPO: <b>2329 (Pietersburg)</b> : At bottom of Hanglip arboretum, (-BB), 5 Jun. 1961, <i>Poynton 12022</i> (PRE); MPUMALANGA: <b>2530 (Lydenburg)</b> : Belfast arboretum plot 71, (-CA), 1 Jun. 1924, <i>Anon. 5624</i> (PRE).                                                                                                                                                                                                                                |
| <i>Pinus durangensis</i> | South Africa. MPUMALANGA: <b>2630 (Carolina)</b> : Ermelo, Chrissiesmeer, Jessievale arboretum, (-BB), 5 Sept. 2014, <i>Cheek 2121</i> (NH); <b>2530 (Lydenburg)</b> : Belfast arboretum, (-CA), Sept. 1968, <i>Van der Sijde 14014</i> (PRE).                                                                                                                                                                                                                                  |
| <i>Pinus echinata</i>    | South Africa. MPUMALANGA: <b>2630 (Carolina)</b> : Ermelo, Chrissiesmeer, Jessievale arboretum, (-BB), 5 Sept. 2014, <i>Cheek 2122</i> (NH). WESTERN CAPE: <b>3322 (Oudtshoorn)</b> : George, Saasveld arboretum, (-DC), 24 Jan. 2014, <i>Cheek 1954</i> (NH).                                                                                                                                                                                                                  |
| <i>Pinus edulis</i>      | South Africa. FREE STATE: <b>2926 (Bloemfontein)</b> : Bloemfontein, Happy Valley conservation area, (-AA), 30 Dec. 2019, <i>Cheek 2745</i> (NH); NORTH WEST: <b>2626 (Klerksdorp)</b> : Lichtenburg arboretum plot 52c, (-AA), 1 Aug. 1961, <i>Poynton 12010</i> (PRE).                                                                                                                                                                                                        |
| <i>Pinus elliotii</i>    | South Africa. MPUMALANGA: <b>2630 (Carolina)</b> : Ermelo, Chrissiesmeer, Jessievale arboretum, (-BB), 5 Sept. 2014, <i>Cheek 2117</i> (NH). EASTERN CAPE: <b>3325 (Port Elizabeth)</b> : Loerie plantation, site of original Loerie arboretum, (-CC), 20 Nov. 2014, <i>Cheek 2246</i> (NH).                                                                                                                                                                                    |
| <i>Pinus engelmannii</i> | South Africa. MPUMALANGA: <b>2530 (Lydenburg)</b> : Belfast arboretum plot 57, (-CA), 7 Sept. 1931, <i>Robertson 7870</i> (PRE); KWAZULU-NATAL: <b>3029 (Kokstad)</b> : Border arboretum plot L12, (-DA), Oct. 1964, <i>Haigh 13667</i> (PRE); WESTERN CAPE: <b>3323 (Willowmore)</b> : Keurbooms River arboretum plot 48, (-CD), n.d., <i>Lange 13144</i> (PRE); <b>3418 (Simons Town)</b> : Tokai arboretum, tree no. 155, (-AB), 7 Aug. 1962, <i>Poynton 12552</i> (PRE).    |
| <i>Pinus greggii</i>     | South Africa. GAUTENG: <b>2528 (Pretoria)</b> : Groenkloof plantation arboretum, (-CC), Mar. 1935, <i>Winckworth 8648</i> (PRE); MPUMALANGA: <b>2530 (Lydenburg)</b> : Belfast arboretum plot 52, (-CA), 1 Nov. 1963, <i>Van Rensburg 13984</i> (PRE); Tweefontein arboretum, (-BB), 1942, <i>Loock 9484</i> (PRE).                                                                                                                                                             |
| <i>Pinus halepensis</i>  | South Africa. EASTERN CAPE: <b>3325 (Port Elizabeth)</b> : Groendal nature reserve, (-CB), 21 Nov. 2014, <i>Cheek 2247</i> (NH); WESTERN CAPE: <b>3323 (Willowmore)</b> : Keurbooms River arboretum plot 59, (-CD), n.d., <i>Lange 13291</i> (PRE).                                                                                                                                                                                                                             |
| <i>Pinus hartwegii</i>   | South Africa. WESTERN CAPE: <b>3418 (Simons Town)</b> : Tokai, arboretum plot 29 compartment A5c, tree 'B', (-AB), 14 Dec. 1931, <i>Clayton 8013</i> (PRE).                                                                                                                                                                                                                                                                                                                     |
| <i>Pinus kesyia</i>      | South Africa. KWAZULU-NATAL: <b>2930 (Pietermaritzburg)</b> : Pietermaritzburg, KZN botanical gardens, (-CB), 24 Jan. 2020, <i>Cheek 2760</i> (NH); WESTERN CAPE: <b>3322 (Oudtshoorn)</b> : Kleinplaat arboretum plot 48, (-DC), Aug. 1964, <i>Lange 13315</i> (PRE); <b>3323 (Willowmore)</b> : Keurboom River arboretum plot 38, (-CD), 7 Mar. 1963, <i>Lange 13142</i> (PRE); <b>3418 (Simons Town)</b> : Tokai main arboretum, (-AB), 8 Jun. 1922, <i>King 4304</i> (PRE). |

|                                                |                                                                                                                                                                                                                                                                                                                                                                                                                                                                                                                                                                                                                                                                                                                                        |
|------------------------------------------------|----------------------------------------------------------------------------------------------------------------------------------------------------------------------------------------------------------------------------------------------------------------------------------------------------------------------------------------------------------------------------------------------------------------------------------------------------------------------------------------------------------------------------------------------------------------------------------------------------------------------------------------------------------------------------------------------------------------------------------------|
| <i>Pinus koraiensis</i>                        | South Africa. MPUMALANGA: <b>2530 (Lydenburg)</b> : Belfast arboretum plot 76b, (-CA), 7 Feb. 1953, <i>Skott 10691</i> (PRE).                                                                                                                                                                                                                                                                                                                                                                                                                                                                                                                                                                                                          |
| <i>Pinus lambertiana</i>                       | South Africa. WESTERN CAPE: <b>3322 (Oudtshoorn)</b> : Kleinplaat arboretum plot L11, (-DC), Aug. 1964, <i>Lange 13314</i> (PRE).                                                                                                                                                                                                                                                                                                                                                                                                                                                                                                                                                                                                      |
| <i>Pinus lawsoniana</i>                        | South Africa. WESTERN CAPE: <b>3418 (Simons Town)</b> : Tokai, plot 71 arboretum in A5c, (-AB), 11 Sept. 1931, <i>Clayton 7900</i> (PRE).                                                                                                                                                                                                                                                                                                                                                                                                                                                                                                                                                                                              |
| <i>Pinus leiophylla</i>                        | South Africa. LIMPOPO: <b>2329 (Pietersburg)</b> : Louis Trichardt, Hanglip arboretum, (-BB), 13 Sept. 2014, <i>Cheek 2147</i> (NH). MPUMALANGA: <b>2630 (Carolina)</b> : Ermelo, Chrissiesmeer, Jessievale arboretum, (-BB), 4 Sept. 2014, <i>Cheek 2108</i> (NH); <b>2530 (Lydenburg)</b> : Belfast arboretum plot 75(b), (-CA), 15 Dec. 1971, <i>Anon. 14581</i> (PRE); KWAZULU-NATAL: <b>3029 (Kokstad)</b> : Weza state plantation, arboretum plot L9, (-DA), 12 Feb. 1982, <i>Quicke 12</i> (PRE); WESTERN CAPE: <b>3418 (Simons Town)</b> : Tokai arboretum, tree no. 142, (-AB), 6 Aug. 1962, <i>Poynton 12559</i> (PRE).                                                                                                      |
| <i>Pinus leiophylla</i> var. <i>leiophylla</i> | South Africa. MPUMALANGA: <b>2630 (Carolina)</b> : Ermelo, Chrissiesmeer, Jessievale arboretum, (-BB), 4 Sept. 2014, <i>Cheek 2111</i> (NH).                                                                                                                                                                                                                                                                                                                                                                                                                                                                                                                                                                                           |
| <i>Pinus luchuensis</i>                        | South Africa. KWAZULU-NATAL: <b>3029 (Kokstad)</b> : Weza state plantation, arboretum plot L6, (-DA), 11 Feb. 1982, <i>Quicke 9</i> (PRE).                                                                                                                                                                                                                                                                                                                                                                                                                                                                                                                                                                                             |
| <i>Pinus lumholtzii</i>                        | South Africa. GAUTENG: <b>2528 (Pretoria)</b> : Groenkloof plantation arboretum, (-CC), 18 Oct. 1931, <i>Hubbard 7975</i> (PRE); WESTERN CAPE: <b>3418 (Simons Town)</b> : Tokai, arboretum extension compartment B35, (-AB), 11 Sept. 1931, <i>Clayton 7904</i> (PRE).                                                                                                                                                                                                                                                                                                                                                                                                                                                                |
| <i>Pinus massoniana</i>                        | South Africa. MPUMALANGA: <b>2630 (Carolina)</b> : Ermelo, Chrissiesmeer, Jessievale arboretum, (-BB), 4 Sept. 2014, <i>Cheek 2103</i> (NH); WESTERN CAPE: <b>3418 (Simons Town)</b> : Tokai arboretum, tree no. 748, (-AB), Oct. 1962, <i>Poynton 12649</i> (PRE).                                                                                                                                                                                                                                                                                                                                                                                                                                                                    |
| <i>Pinus maximinoi</i>                         | South Africa. MPUMALANGA: <b>2630 (Carolina)</b> : Ermelo, Chrissiesmeer, Jessievale arboretum, (-BB), 4 Sept. 2014, <i>Cheek 2106</i> (NH); EASTERN CAPE: <b>3226 (Fort Beaufort)</b> : Katberg arboretum, (-BC), 15 Oct. 1931, <i>Preller 7955</i> (PRE); <b>3327 (Peddie)</b> : Fort Grey arboretum plot 7, (-BB), 12 Oct. 1931, <i>Emmett 7949</i> (PRE).                                                                                                                                                                                                                                                                                                                                                                          |
| <i>Pinus merkusii</i>                          | South Africa. <b>2330 (Tzaneen)</b> : Timbadola arboretum, (-AA), 10 Jul. 1962, <i>Poynton &amp; Luckhoff 12537</i> (PRE); KWAZULU-NATAL: <b>2832 (Mtubatuba)</b> : Kwambonambi plantation arboretum plot B15, (-CA), 13 Mar. 1964, <i>Haigh 2351</i> (PRE); <b>3029 (Kokstad)</b> : Border arboretum plot L7c, (-DA), Oct. 1964, <i>Haigh 2406</i> (PRE).                                                                                                                                                                                                                                                                                                                                                                             |
| <i>Pinus michoacana</i>                        | South Africa. LIMPOPO: <b>2330 (Tzaneen)</b> : Middelkop, plot 6, upper arboretum, (-CA), 16 Jul. 1931, <i>Robertson 7810</i> (PRE).                                                                                                                                                                                                                                                                                                                                                                                                                                                                                                                                                                                                   |
| <i>Pinus monophylla</i>                        | South Africa. MPUMALANGA: <b>2530 (Lydenburg)</b> : Belfast arboretum plot 76, (-CA), 7 Sept. 1931, <i>Robertson 7872</i> (PRE);                                                                                                                                                                                                                                                                                                                                                                                                                                                                                                                                                                                                       |
| <i>Pinus montezumae</i>                        | South Africa. LIMPOPO: <b>2330 (Tzaneen)</b> : Woodbush plantation, tree no 6 in arboretum plot 25, (-CC), 14 Sept. 1931, <i>Grewcock 7896</i> (PRE); MPUMALANGA: <b>2630 (Carolina)</b> : Ermelo, Chrissiesmeer, Jessievale arboretum, (-BB), 4 Sept. 2014, <i>Cheek 2102</i> (NH); <b>2530 (Lydenburg)</b> : Belfast arboretum plot 85, (-CA), 7 Sept. 1931, <i>Robertson 7871</i> (PRE); KWAZULU-NATAL: <b>3029 (Kokstad)</b> : Weza state plantation, arboretum plot L14, (-DA), 2 Feb. 1982, <i>Quicke 14</i> (PRE); WESTERN CAPE: <b>3418 (Simons Town)</b> : Tokai, tree A in plot 27 in Arboretum in A5c, (-AB), 11 Sept. 1931, <i>Clayton 7902</i> (PRE).                                                                     |
| <i>Pinus muricata</i>                          | South Africa. WESTERN CAPE: <b>3418 (Simons Town)</b> : Tokai, Flagstaff arboretum, (-AB), Oct. 1962, <i>Poynton 12556</i> (PRE).                                                                                                                                                                                                                                                                                                                                                                                                                                                                                                                                                                                                      |
| <i>Pinus nigra</i>                             | South Africa. MPUMALANGA: <b>2530 (Lydenburg)</b> : Belfast plantation, arboretum plot 37, (-CA), 1 Nov. 1963, <i>Van Rensburg 14182</i> (PRE); WESTERN CAPE: <b>3418 (Simons Town)</b> : Tokai main arboretum, tree no. 1226, (-AB), Oct. 1962, <i>Poynton 12557</i> (PRE).                                                                                                                                                                                                                                                                                                                                                                                                                                                           |
| <i>Pinus occidentalis</i>                      | South Africa. KWAZULU-NATAL: <b>2832 (Mtubatuba)</b> : Kwambonambi arboretum, (-CA), Aug. 1958, <i>Schutz 995</i> (PRE).                                                                                                                                                                                                                                                                                                                                                                                                                                                                                                                                                                                                               |
| <i>Pinus oocarpa</i>                           | South Africa. LIMPOPO: <b>2329 (Pietersburg)</b> : Louis Trichardt, Hanglip arboretum, (-BB), 13 Sept. 2014, <i>Cheek 2149</i> (NH). KWAZULU-NATAL: <b>2732 (Ubombo)</b> : Mbazwane, Manzangwenya arboretum, (-BA), 21 Jan. 2016, <i>Cheek 2545</i> (NH); <b>2832 (Mtubatuba)</b> : Empangeni, Kwambonambi arboretum, Compt. A052L, (-CA), 12 Jun. 2013, <i>Cheek 1713</i> (NH); <b>3029 (Port Shepstone)</b> : Harding, Blackwater arboretum, (-DA), 5 Aug. 2014, <i>Cheek 2090</i> (NH); WESTERN CAPE: <b>3418 (Simons Town)</b> : Tokai arboretum, tree no. 149, (-AB), 6 Aug. 1962, <i>Poynton 12539</i> (PRE); EASTERN CAPE: <b>3327 (Peddie)</b> : Fort Grey arboretum plot 7(i), (-BB), 16 Oct. 1931, <i>Emmett 7957</i> (PRE). |



|                                                      |                                                                                                                                                                                                                                                                                                                                                                                                                                                                                                                                                                                                                                                                             |
|------------------------------------------------------|-----------------------------------------------------------------------------------------------------------------------------------------------------------------------------------------------------------------------------------------------------------------------------------------------------------------------------------------------------------------------------------------------------------------------------------------------------------------------------------------------------------------------------------------------------------------------------------------------------------------------------------------------------------------------------|
| <i>Pinus oocarpa</i> var. <i>trifoliata</i>          | South Africa. KWAZULU-NATAL: <b>2832 (Mtubatuba)</b> : Empangeni, Kwambonabi arboretum, Compt. A052L, (-CA), 12 Jun. 2013, <i>Cheek</i> 1711 (NH).                                                                                                                                                                                                                                                                                                                                                                                                                                                                                                                          |
| <i>Pinus palustris</i>                               | South Africa. WESTERN CAPE: <b>3323 (Willowmore)</b> : Keurbooms River arboretum plot 51, (-CD), 3 Jan. 1979, <i>Du Toit</i> 16964 (PRE).                                                                                                                                                                                                                                                                                                                                                                                                                                                                                                                                   |
| <i>Pinus patula</i>                                  | South Africa. MPUMALANGA: <b>2630 (Carolina)</b> : Ermelo, Chrissiesmeer, Jessievale arboretum, (-BB), 4 Sept. 2014, <i>Cheek</i> 2112 (NH). <b>2530 (Lydenburg)</b> : Sabie, Bergvliet plantation, D.R. de Wet arboretum, (-BD), 11 Jul. 2014, <i>Cheek</i> 2039 (NH).                                                                                                                                                                                                                                                                                                                                                                                                     |
| <i>Pinus patula</i> var. <i>patula</i>               | South Africa. MPUMALANGA: <b>2630 (Carolina)</b> : Ermelo, Chrissiesmeer, Jessievale arboretum, (-BB), 4 Sept. 2014, <i>Cheek</i> 2114 (NH). KWAZULU-NATAL: <b>2929 (Underberg)</b> : Bulwer, SAPPI plantation, site of original Xotcheyake arboretum, (-DD), 18 Apr. 2012, <i>Cheek</i> 1278 (NH).                                                                                                                                                                                                                                                                                                                                                                         |
| <i>Pinus pinea</i>                                   | South Africa. MPUMALANGA: <b>2630 (Carolina)</b> : Ermelo, Chrissiesmeer, Jessievale arboretum, (-BB), 4 Sept. 2014, <i>Cheek</i> 2115 (NH).                                                                                                                                                                                                                                                                                                                                                                                                                                                                                                                                |
| <i>Pinus pringlei</i>                                | South Africa. MPUMALANGA: <b>2530 (Lydenburg)</b> : Tweefontein plantation arboretum plot 24, (-BB), 23 Apr. 1970, <i>Loock</i> 15595 (PRE).                                                                                                                                                                                                                                                                                                                                                                                                                                                                                                                                |
| <i>Pinus pseudostrobus</i>                           | South Africa. MPUMALANGA: <b>2630 (Carolina)</b> : Ermelo, Chrissiesmeer, Jessievale arboretum, (-BB), 4 Sept. 2014, <i>Cheek</i> 2109 (NH).                                                                                                                                                                                                                                                                                                                                                                                                                                                                                                                                |
| <i>Pinus pseudostrobus</i> var. <i>pseudostrobus</i> | South Africa. LIMPOPO: <b>2329 (Pietersburg)</b> : Louis Trichardt, Hanglip arboretum, (-BB), 13 Sept. 2014, <i>Cheek</i> 2151 (NH); KWAZULU-NATAL: <b>3029 (Kokstad)</b> : Weza state plantation, arboretum plot L8, (-DA), 12 Feb. 1982, <i>Quicke</i> 11 (PRE).                                                                                                                                                                                                                                                                                                                                                                                                          |
| <i>Pinus rigida</i>                                  | South Africa. MPUMALANGA: <b>2530 (Lydenburg)</b> : Belfast plantation, arboretum plot 28, (-CA), 1 Nov. 1963, <i>Van Rensburg</i> 14183 (PRE); WESTERN CAPE: <b>3322 (Oudtshoorn)</b> : Kleinplaat arboretum, Plot 52, (-DC), 1 May 1975, <i>Poynton</i> 15579 (PRE).                                                                                                                                                                                                                                                                                                                                                                                                      |
| <i>Pinus roxburghii</i>                              | South Africa. GAUTENG: <b>2528 (Pretoria)</b> : Pretoria, Union Buildings, Flanagan arboretum, (-CA), 23 Aug. 2021, <i>Cheek</i> 2978 (NH); University of Pretoria, Hatfield campus, (-CC), 28 Aug. 2021, <i>Cheek</i> 3030 (NH); MPUMALANGA: <b>2630 (Carolina)</b> : Ermelo, Chrissiesmeer, Jessievale arboretum, (-BB), 5 Sept. 2014, <i>Cheek</i> 2120 (NH). KWAZULU-NATAL: <b>2732 (Ubombo)</b> : Mbazwane, Manzangwenya arboretum, (-BA), 21 Jan. 2016, <i>Cheek</i> 2546 (NH).                                                                                                                                                                                       |
| <i>Pinus sabiniana</i>                               | South Africa. EASTERN CAPE: <b>3227 (Stutterheim)</b> : Evelyn valley arboretum plot 4, (-CA), 19 Mar. 1982, <i>Brown</i> 16574 (PRE).                                                                                                                                                                                                                                                                                                                                                                                                                                                                                                                                      |
| <i>Pinus serotina</i>                                | South Africa. KWAZULU-NATAL: <b>2832 (Mtubatuba)</b> : St. Lucia arboretum extension, (-AB), 30 Jan. 1968, <i>Haigh</i> 2520 (PRE); WESTERN CAPE: <b>3322 (Oudtshoorn)</b> : Witfontein arboretum, (-CD), 27 Aug. 1982, <i>Morze</i> 2357 (PRE).                                                                                                                                                                                                                                                                                                                                                                                                                            |
| <i>Pinus strobiformis</i>                            | South Africa. KWAZULU-NATAL: <b>3029 (Kokstad)</b> : Weza state plantation, arboretum plot L13, (-DA), 12 Feb. 1982, <i>Quicke</i> 15 (PRE).                                                                                                                                                                                                                                                                                                                                                                                                                                                                                                                                |
| <i>Pinus taeda</i>                                   | South Africa. LIMPOPO: <b>2329 (Pietersburg)</b> : Tzaneen, Woodbush arboretum, (-DD), 14 Sept. 2014, <i>Cheek</i> 2164 (NH); KWAZULU-NATAL: <b>2930 (Pietermaritzburg)</b> : Durban, Hillcrest, Makaranga Gardens, (-DD), 4 Jun. 2019, <i>Cheek</i> 2654 (NH); <b>3030 (Port Shepstone)</b> : Uvongo, Skyline Arboretum, (-CD), 3 Mar. 2022, <i>Cheek</i> 3147 (NH); EASTERN CAPE: <b>3325 (Port Elizabeth)</b> : Port Elizabeth, Uitenhage, Groendal nature reserve, (-CB), 21 Nov. 2014, <i>Cheek</i> 2248 (NH); WESTERN CAPE: <b>3418 (Simons Town)</b> : Cape Town, Tokai arboretum, parking space at arboretum entrance, (-AB), 22 Mar. 2018, <i>Cheek</i> 2713 (NH). |
| <i>Pinus taiwanensis</i>                             | South Africa. KWAZULU-NATAL: <b>2832 (Mtubatuba)</b> : St. Lucia arboretum, project 4, plot 2, (-AD), 27 Aug. 1975, <i>Haigh</i> 15579 (PRE).                                                                                                                                                                                                                                                                                                                                                                                                                                                                                                                               |
| <i>Pinus tecumanii</i>                               | South Africa. KWAZULU-NATAL: <b>2832 (Mtubatuba)</b> : Empangeni, Kwambonabi arboretum, Compt. A052A, (-CA), 12 Jun. 2013, <i>Cheek</i> 1709 (NH).                                                                                                                                                                                                                                                                                                                                                                                                                                                                                                                          |
| <i>Pinus teocote</i>                                 | South Africa. MPUMALANGA: <b>2530 (Carolina)</b> : Jessivale arboretum plot I5, (-BA), 8 Sept. 1931, <i>Robertson</i> 7876 (PRE); WESTERN CAPE: <b>3418 (Simons Town)</b> : Tokai, tree B on plot 17, Arboretum in A5c, (-AB), 11 Sept. 1931, <i>Clayton</i> 7901 (PRE).                                                                                                                                                                                                                                                                                                                                                                                                    |
| <i>Pinus torreyana</i>                               | South Africa. WESTERN CAPE: <b>3418 (Simons Town)</b> : Tokai arboretum, no. 421, (-AB), Sept. 1923, <i>King</i> 4947 (PRE).                                                                                                                                                                                                                                                                                                                                                                                                                                                                                                                                                |
| <i>Pinus thunbergii</i>                              | South Africa. MPUMALANGA: <b>2630 (Carolina)</b> : Ermelo, Chrissiesmeer, Jessievale arboretum, (-BB), 5 Sept. 2014, <i>Cheek</i> 2116 (NH); <b>2530 (Lydenburg)</b> : Belfast arboretum plot 44, (-CA), 1 Nov. 1963, <i>Van Rensburg</i> 14184 (PRE).                                                                                                                                                                                                                                                                                                                                                                                                                      |
| <i>Pinus tropicalis</i>                              | South Africa. KWAZULU-NATAL: <b>2832 (Mtubatuba)</b> : Dukuduku arboretum B, (-AD), 23 Sept. 1981, <i>Coetzee</i> 1 (PRE).                                                                                                                                                                                                                                                                                                                                                                                                                                                                                                                                                  |

|                                                                                                         |                                                                                                                                                                                                                                                                                                                                                                                                                                                                                                                                                                                                                                                                                                                                                                                                                                                                                                                                                                                                                                                                                                               |
|---------------------------------------------------------------------------------------------------------|---------------------------------------------------------------------------------------------------------------------------------------------------------------------------------------------------------------------------------------------------------------------------------------------------------------------------------------------------------------------------------------------------------------------------------------------------------------------------------------------------------------------------------------------------------------------------------------------------------------------------------------------------------------------------------------------------------------------------------------------------------------------------------------------------------------------------------------------------------------------------------------------------------------------------------------------------------------------------------------------------------------------------------------------------------------------------------------------------------------|
| <i>Pinus wallichiana</i> var. <i>wallichiana</i>                                                        | South Africa. MPUMALANGA: <b>2630 (Carolina)</b> : Ermelo, Chrissiesmeer, Jessievale arboretum, (-BB), 5 Sept. 2014, <i>Cheek</i> 2119 (NH); MPUMALANGA: <b>2530 (Lydenburg)</b> : Belfast arboretum plot 7, (-CA), 1 Nov. 1963, <i>Munro</i> 13952 (PRE); KWAZULU-NATAL: <b>2930 (Pietermaritzburg)</b> : Howick, Benvie arboretum, (-AD), 23 Nov. 2021, <i>Cheek</i> 3095 (NH); EASTERN CAPE: <b>3227 (Stutterheim)</b> : Kubusie plantation, Evelyn Valley arboretum, 13 Jan. 2013, <i>Cheek</i> 1542 (NH); Evelyn Valley arboretum, 12 Feb. 2016, <i>Cheek</i> 2476 (NH); <b>3128 (Umtata)</b> : (-BA), Ntywenka arboretum plot 7, 16 Aug. 1962, <i>Haigh</i> 2274 (PRE).                                                                                                                                                                                                                                                                                                                                                                                                                                 |
| <i>Pistacia atlantica</i>                                                                               | South Africa. FREE STATE: <b>2926 (Bloemfontein)</b> : Bloemfontein, Third Raadsaal, front garden, (-AA), 18 Jun. 2021, <i>Cheek</i> 2962 (NH).                                                                                                                                                                                                                                                                                                                                                                                                                                                                                                                                                                                                                                                                                                                                                                                                                                                                                                                                                               |
| <i>Pistacia chinensis</i>                                                                               | South Africa. LIMPOPO: <b>2330 (Tzaneen)</b> : Klein Australië arboretum plot 25, (-AA), Feb. 1952, <i>Van Rensburg</i> 10442 (PRE).                                                                                                                                                                                                                                                                                                                                                                                                                                                                                                                                                                                                                                                                                                                                                                                                                                                                                                                                                                          |
| <i>Pittosporum eugenioides</i>                                                                          | South Africa. WESTERN CAPE: <b>3418 (Simons Town)</b> : Tokai main arboretum, (-AB), Oct. 1953, <i>Van Rensburg</i> 11792 (PRE).                                                                                                                                                                                                                                                                                                                                                                                                                                                                                                                                                                                                                                                                                                                                                                                                                                                                                                                                                                              |
| <i>Pittosporum tenuifolium</i>                                                                          | South Africa. WESTERN CAPE: <b>3418 (Simons Town)</b> : Tokai, Paddock arboretum, compartment A5c2 plot 43, (-AB), 21 Mar. 1930, <i>Student</i> 19974 (PRE).                                                                                                                                                                                                                                                                                                                                                                                                                                                                                                                                                                                                                                                                                                                                                                                                                                                                                                                                                  |
| <i>Pittosporum tobira</i>                                                                               | South Africa. WESTERN CAPE: <b>3418 (Simons Town)</b> : Tokai main arboretum, tree no. 1083A, (-AB), 1954, <i>Van Rensburg</i> 11125 (PRE).                                                                                                                                                                                                                                                                                                                                                                                                                                                                                                                                                                                                                                                                                                                                                                                                                                                                                                                                                                   |
| <i>Pittosporum undulatum</i>                                                                            | South Africa. WESTERN CAPE: <b>3418 (Simons Town)</b> : Tokai arboretum, tree no. 562, (-AB), 10 Aug. 1962, <i>Poynton</i> 12647 (PRE); Tokai arboretum, between Lister's tea room and and stream, (-AB), 22 Mar. 2018, <i>Cheek</i> 2717 (NBG).                                                                                                                                                                                                                                                                                                                                                                                                                                                                                                                                                                                                                                                                                                                                                                                                                                                              |
| <i>Pittosporum viridiflorum</i>                                                                         | South Africa. GAUTENG: <b>2528 (Pretoria)</b> : Pretoria national zoo, (-CA), 24 Aug. 2021, <i>Cheek</i> 2990 (NH).                                                                                                                                                                                                                                                                                                                                                                                                                                                                                                                                                                                                                                                                                                                                                                                                                                                                                                                                                                                           |
| <i>Platanus</i> × <i>hispanica</i> cv. 'Acerifolia'                                                     |                                                                                                                                                                                                                                                                                                                                                                                                                                                                                                                                                                                                                                                                                                                                                                                                                                                                                                                                                                                                                                                                                                               |
| outh Africa. GAUTENG: <b>2528 (Pretoria)</b> : Irene dairy farm, (-CC), 21 Mar. 2021, <i>Cheek</i> 2848 | NH); NORTH WEST: <b>2627 (Potchefstroom)</b> : Potchefstroom University administration building, (-CA), 17 Jan. 1985, <i>Poynton</i> 19282 (PRE); FREE STATE: <b>2827 (Senekal)</b> : Senekal, NG church garden, (-BC), 16 May 2021, <i>Cheek</i> 2909 (NH); KWAZULU-NATAL: <b>2930 (Pietermaritzburg)</b> : Cedara, Cedara arboretum, (-CB), 13 Mar. 2012, <i>Cheek</i> 1247 (NH).                                                                                                                                                                                                                                                                                                                                                                                                                                                                                                                                                                                                                                                                                                                           |
| <i>Platycladus orientalis</i>                                                                           | South Africa. GAUTENG: <b>2528 (Pretoria)</b> : Pretoria national zoo, (-CA), 24 Aug. 2021, <i>Cheek</i> 3088 (NH); University of Pretoria, Hatfield campus, (-CC), 28 Aug. 2021, <i>Cheek</i> 3037 (NH); Pretoria, Austin Roberts bird sanctuary, (-CC), 27 Aug. 2021, <i>Cheek</i> 3019 (NH); NORTH WEST: <b>2627 (Potchefstroom)</b> : Potchefstroom University administration building, (-CA), 17 Jan. 1985, <i>Poynton</i> 19285 (PRE); FREE STATE: <b>2926 (Bloemfontein)</b> : Bloemfontein, Happy Valley conservation area, (-AA), 30 Dec. 2019, <i>Cheek</i> 2749 (NH); <b>2827 (Senekal)</b> : Senekal, NG church garden, (-BC), 16 May 2021, <i>Cheek</i> 2914 (NH); MPUMALANGA: <b>2530 (Lydenburg)</b> : Tweefontein arboretum, (-BB), 17 Feb. 1976, <i>Anon.</i> 15961 (PRE); KWAZULU-NATAL: <b>2929 (Underberg)</b> : Kenmo Lake, (-DA), 15 Sept. 2021, <i>Cheek</i> 3053 (NH); <b>2931 (Stanger)</b> : Durban, Mitchell Park, (-CC), 25 Nov. 2021, <i>Cheek</i> 3107 (NH); EASTERN CAPE: <b>3326 (Grahamstown)</b> : Grahamstown botanic garden, (-BC), 15 Jun. 2021, <i>Cheek</i> 2945 (NH). |
| <i>Plerandra elegantissima</i>                                                                          | South Africa. KWAZULU-NATAL: <b>2931 (Stanger)</b> : Tongaat, Amanzimnyama Gardens, (-CA), 29 Jul. 2021, <i>Cheek</i> 2966 (NH).                                                                                                                                                                                                                                                                                                                                                                                                                                                                                                                                                                                                                                                                                                                                                                                                                                                                                                                                                                              |
| <i>Podocarpus gracilior</i>                                                                             | South Africa. WESTERN CAPE: <b>3418 (Simons Town)</b> : Tokai main arboretum plot no 303, (-AB), 13 Mar. 1986, <i>Poynton</i> 19710 (PRE).                                                                                                                                                                                                                                                                                                                                                                                                                                                                                                                                                                                                                                                                                                                                                                                                                                                                                                                                                                    |
| <i>Podocarpus henkelii</i>                                                                              | South Africa. KWAZULU-NATAL: <b>2929 (Underberg)</b> : Nottingham Road, Clifton Preparatory School, (-BD), 24 Feb. 2022, <i>Cheek</i> 3126 (NH); <b>2930 (Pietermaritzburg)</b> : Cedara, Cedara arboretum, (-CB), 13 Mar. 2012, <i>Cheek</i> 1241 (NH).                                                                                                                                                                                                                                                                                                                                                                                                                                                                                                                                                                                                                                                                                                                                                                                                                                                      |
| <i>Podocarpus latifolius</i>                                                                            | GAUTENG: <b>2528 (Pretoria)</b> : Pretoria, Jan Cilliers Park, (-CC), 17 Mar. 2021, <i>Cheek</i> 2819                                                                                                                                                                                                                                                                                                                                                                                                                                                                                                                                                                                                                                                                                                                                                                                                                                                                                                                                                                                                         |
| <i>Podocarpus macrophyllus</i>                                                                          | South Africa. GAUTENG: <b>2528 (Pretoria)</b> : Pretoria zoo, near hippos (-CA), 12 Mar. 1916, <i>Robertson</i> 1872 (PRE).                                                                                                                                                                                                                                                                                                                                                                                                                                                                                                                                                                                                                                                                                                                                                                                                                                                                                                                                                                                   |
| <i>Polygala myrtifolia</i>                                                                              | South Africa. GAUTENG: <b>2528 (Pretoria)</b> : Pretoria, Jan Cilliers Park, (-CC), 17 Mar. 2021, <i>Cheek</i> 3076 (NH).                                                                                                                                                                                                                                                                                                                                                                                                                                                                                                                                                                                                                                                                                                                                                                                                                                                                                                                                                                                     |
| <i>Populus angustifolia</i>                                                                             | South Africa. FREE STATE: <b>2926 (Bloemfontein)</b> : Bloemfontein arboretum, (-AA), Jan. 1920, <i>Toerien</i> 2932 (PRE).                                                                                                                                                                                                                                                                                                                                                                                                                                                                                                                                                                                                                                                                                                                                                                                                                                                                                                                                                                                   |
| <i>Populus balsamifera</i>                                                                              | South Africa. FREE STATE: <b>2926 (Bloemfontein)</b> : Bloemfontein arboretum, (-AA), Jan. 1920, <i>Toerien</i> 2931 (PRE).                                                                                                                                                                                                                                                                                                                                                                                                                                                                                                                                                                                                                                                                                                                                                                                                                                                                                                                                                                                   |

|                                 |                                                                                                                                                                                                                                                                                                                                                                                                                              |
|---------------------------------|------------------------------------------------------------------------------------------------------------------------------------------------------------------------------------------------------------------------------------------------------------------------------------------------------------------------------------------------------------------------------------------------------------------------------|
| <i>Populus x canescens</i>      | South Africa. GAUTENG: <b>2528 (Pretoria)</b> : Pretoria, Austin Roberts bird sanctuary, (-CC), 27 Aug. 2021, <i>Cheek 3018</i> (NH).                                                                                                                                                                                                                                                                                        |
| <i>Populus deltoides</i>        | South Africa. GAUTENG: <b>2528 (Pretoria)</b> : Pretoria zoo, (-CA), Nov. 1954, <i>De Winter 2152</i> (PRE).                                                                                                                                                                                                                                                                                                                 |
| <i>Populus fremontii</i>        | South Africa. GAUTENG: <b>2528 (Pretoria)</b> : Austin Roberts Bird Sanctuary, (-CC), 27 Aug. 2021, <i>Cheek 3014</i> (NH); South Africa. FREE STATE: <b>2926 (Bloemfontein)</b> : Bloemfontein arboretum, (-AA), 8 May 1922, <i>Toerien 4132</i> (PRE); KWAZULU-NATAL: <b>2929 (Underberg)</b> : Himeville, Kenmo Lake arboretum, (-DA), 15 Sept. 2021, <i>Cheek 3056</i> (NH).                                             |
| <i>Populus nigra</i> 'Italica'  | South Africa. GAUTENG: <b>2528 (Pretoria)</b> : Pretoria zoo, (-CA), Nov. 1954, <i>De Winter 2151</i> (PRE).                                                                                                                                                                                                                                                                                                                 |
| <i>Populus simonii</i>          | South Africa. GAUTENG: <b>2528 (Pretoria)</b> : University of Pretoria, Hatfield campus, (-CC), 28 Aug. 2021, <i>Cheek 3031</i> (NH).                                                                                                                                                                                                                                                                                        |
| <i>Prosopis glandulosa</i>      | South Africa. WESTERN CAPE: <b>3319 (Worcester)</b> : Robertson arboretum plot 31, (-DD), Nov. 1915, <i>Anon. 1784</i> (PRE).                                                                                                                                                                                                                                                                                                |
| <i>Prosopis juliflora</i>       | South Africa. FREE STATE: <b>2926 (Bloemfontein)</b> : Bloemfontein, Happy Valley conservation area, (-AA), 30 Dec. 2019, <i>Cheek 2750</i> (NH).                                                                                                                                                                                                                                                                            |
| <i>Protea susannae</i>          | South Africa. GAUTENG: <b>2528 (Pretoria)</b> : Pretoria, Jan Cilliers park, (-CC), 17 Mar. 2021, <i>Cheek 2823</i> (NH).                                                                                                                                                                                                                                                                                                    |
| <i>Prunus africana</i>          | South Africa. GAUTENG: <b>2528 (Pretoria)</b> : University of Pretoria, main campus, (-CC), 28 Aug. 2021, <i>Cheek 3035</i> (NH).                                                                                                                                                                                                                                                                                            |
| <i>Prunus laurocerasus</i>      | South Africa. GAUTENG: <b>2528 (Pretoria)</b> : Pretoria zoo, (-CA), 16 Oct. 1946, <i>Repton 3057</i> (PRE).                                                                                                                                                                                                                                                                                                                 |
| <i>Prunus serotina</i>          | South Africa. LIMPOPO: <b>2329 (Pietersburg)</b> : Haenertsburg, Sequoia Stay Gardens, (-DD), 20 Sept. 2019, <i>Cheek 2676</i> (PRE).                                                                                                                                                                                                                                                                                        |
| <i>Pseudotsuga macrocarpa</i>   | South Africa. WESTERN CAPE: <b>3418 (Simons Town)</b> : Tokai main arboretum, plot 10, (-AB), 6 Dec. 1915, <i>Willmot 1807</i> (PRE).                                                                                                                                                                                                                                                                                        |
| <i>Pseudotsuga menziesii</i>    | South Africa. WESTERN CAPE: <b>3418 (Simons Town)</b> : Tokai main arboretum, (-AB), Oct. 1953, <i>Van Resnburg 10856</i> (PRE).                                                                                                                                                                                                                                                                                             |
| <i>Pterocarpus angolensis</i>   | South Africa. GAUTENG: <b>2528 (Pretoria)</b> : Pretoria national botanic garden, (-CB), 25 Aug. 2021, <i>Cheek 2993</i> (NH).                                                                                                                                                                                                                                                                                               |
| <i>Pterocarpus indicus</i>      | South Africa. KWAZULU-NATAL: <b>2931 (Stanger)</b> : Mitchell Park, (-CC), 8 Mar. 1988, <i>Bodenstein 493</i> (NH).                                                                                                                                                                                                                                                                                                          |
| <i>Pterocarya stenoptera</i>    | South Africa. KWAZULU-NATAL: <b>2929 (Underberg)</b> : Himeville, Kenmo Lake arboretum, (-DA), 2 Mar. 2021, <i>Cheek 2783</i> (NH).                                                                                                                                                                                                                                                                                          |
| <i>Ptychosperma microcarpum</i> | South Africa. KWAZULU-NATAL: <b>2931 (Stanger)</b> : Tongaat, Amanzimnyama Garden, (-CA), 14 Oct. 2021, <i>Cheek 3077</i> (NH).                                                                                                                                                                                                                                                                                              |
| <i>Punica granatum</i>          | South Africa. FREE STATE: <b>2827 (Senekal)</b> : Senekal, NG church garden, (-BC), 16 May 2021, <i>Cheek 2917</i> (NH).                                                                                                                                                                                                                                                                                                     |
| <i>Pyracantha angustifolia</i>  | South Africa. GAUTENG: <b>2528 (Pretoria)</b> : Pretoria zoo, (-CA), 10 May 1936, <i>Winkworth 8448</i> (PRE).                                                                                                                                                                                                                                                                                                               |
| <i>Pyracantha coccinea</i>      | South Africa. GAUTENG: <b>2528 (Pretoria)</b> : Pretoria zoo, (-CA), 10 May 1934, <i>Winkworth 8446</i> (PRE).                                                                                                                                                                                                                                                                                                               |
| <i>Pyrus calleryana</i>         | South Africa. LIMPOPO: <b>2329 (Tzaneen)</b> : Magoebaskloof, Cheerio Gardens, (-CC), 25 Mar. 2021, <i>Cheek 2882</i> (NH); KWAZULU-NATAL: <b>2929 (Underberg)</b> : Himeville, Kenmo Lake arboretum, (-DA), 2 Mar. 2021, <i>Cheek 2775</i> (NH).                                                                                                                                                                            |
| <i>Quercus acutissima</i>       | South Africa. LIMPOPO: <b>2330 (Tzaneen)</b> : Tzaneen, JDM Keet arboretum, (-CA), 19 Sept. 2019, <i>Cheek 2664</i> (PRE); MPUMALANGA: <b>2530 (Lydenburg)</b> : Nelspruit, White River, along the R537, close to old Bultfontein arboretum, (-BB), 14 Jul. 2014, <i>Cheek 2066</i> (NH); MPUMALANGA: <b>2530 (Lydenburg)</b> : Sabie, D.R. de Wet For. Res. Sta. arboretum, (-BB), 24 Mar. 1973, <i>Drummond 28</i> (GLOW). |
| <i>Quercus bicolor</i>          | South Africa. WESTERN CAPE: <b>3418 (Simons Town)</b> : Tokai, tree no. 172, arboretum, (-AB), 19 Feb. 1944, <i>Wicht 9645</i> (PRE).                                                                                                                                                                                                                                                                                        |
| <i>Quercus cerris</i>           | South Africa. EASTERN CAPE: <b>3227 (Stutterheim)</b> : Fort Cunynghame plantation, Fort Cunynghame arboretum, 15 Nov. 2014, <i>Cheek 2198</i> (NH).                                                                                                                                                                                                                                                                         |

|                                                |                                                                                                                                                                                                                                                                                                                                                                                                  |
|------------------------------------------------|--------------------------------------------------------------------------------------------------------------------------------------------------------------------------------------------------------------------------------------------------------------------------------------------------------------------------------------------------------------------------------------------------|
| <i>Quercus leucotrichophora</i>                | South Africa. LIMPOPO: <b>2330 (Tzaneen)</b> : Woodbush arboretum, (-CC), 16 Feb. 1952, <i>Van Rensburg 10454</i> (PRE); KWAZULU-NATAL: <b>2930 (Pietermaritzburg)</b> : Pietermaritzburg, KZN botanical gardens, (-CB), 24 Jan. 2020, <i>Cheek 2762</i> (NH).                                                                                                                                   |
| <i>Quercus marilandica</i>                     | South Africa. WESTERN CAPE: <b>3418 (Simons Town)</b> : Tokai main arboretum, trees no. 208 & 263, (-AB), 19 Feb. 1944, <i>Wicht 9655</i> (PRE).                                                                                                                                                                                                                                                 |
| <i>Quercus mexicana</i>                        | South Africa. LIMPOPO: <b>2330 (Tzaneen)</b> : Woodbush arboretum, (-CC), Mar. 1948, <i>De Geus 9984</i> (PRE); MPUMALANGA: <b>2530 (Lydenburg)</b> : Sabie, D.R. de Wet For. Res. Sta. arboretum, (-BB), 24 Mar. 1973, <i>Drummond 29</i> (GLOW).                                                                                                                                               |
| <i>Quercus muehlenbergii</i>                   | South Africa. WESTERN CAPE: <b>3418 (Simons Town)</b> : Tokai main arboretum tree no. 253, (-AB), 13 Feb. 1944, <i>Wicht 9640</i> (PRE).                                                                                                                                                                                                                                                         |
| <i>Quercus nigra</i>                           | South Africa. LIMPOPO: <b>2329 (Pietersburg)</b> : Haenertsburg, Sequoia Stay Gardens, (-DD), 20 Sept. 2019, <i>Cheek 2668</i> (PRE); GAUTENG: <b>2528 (Pretoria)</b> : University of Pretoria Hillcrest campus, (-CB), 28 Aug. 2021, <i>Cheek 3066</i> (NH); MPUMALANGA: <b>2530 (Lydenburg)</b> : Sabie, D.R. de Wet For. Res. Sta. arboretum, (-BB), 21 Mar. 1973, <i>Drummond 30</i> (GLOW). |
| <i>Quercus palustris</i>                       | South Africa. KWAZULU-NATAL: <b>2930 (Pietermaritzburg)</b> : Cedara, Cedara arboretum, (-CB), 13 Mar. 2012, <i>Cheek 1241</i> (NH); Pinetown, Japanese Gardens, (-DD), 3 Dec. 2020, <i>Cheek 2974</i> (NH).                                                                                                                                                                                     |
| <i>Quercus prinus</i>                          | South Africa. WESTERN CAPE: <b>3419 (Caledon)</b> : Grabouw, Elgin plantation, Lebanon arboretum, (-BB), 20 Jun. 2011, <i>Cheek 952</i> (NH).                                                                                                                                                                                                                                                    |
| <i>Quercus robur</i>                           | South Africa. KWAZULU-NATAL: <b>2929 (Underberg)</b> : Himeville, Kenmo Lake arboretum, (-DA), 2 Mar. 2021, <i>Cheek 2782</i> (NH); MPUMALANGA: <b>2530 (Lydenburg)</b> : Belfast arboretum plot 65, (-CA), 2 May 1983, <i>Anon 17692</i> (PRE).                                                                                                                                                 |
| <i>Quercus rubra</i>                           | South Africa. GAUTENG: <b>2528 (Pretoria)</b> : Pretoria zoo, (-CA), Nov 1943, <i>Voorendyk 9616</i> (PRE).                                                                                                                                                                                                                                                                                      |
| <i>Quercus rugosa</i>                          | South Africa. KWAZULU-NATAL: <b>2930 (Pietermaritzburg)</b> : Cedara, Cedara arboretum, (-CB), 16 Mar. 2012, <i>Cheek 1250</i> (NH).                                                                                                                                                                                                                                                             |
| <i>Quercus stellata</i>                        | South Africa. WESTERN CAPE: <b>3418 (Simons Town)</b> : Tokai main arboretum tree no. 40, (-AB), Oct. 1962, <i>Poynton 12697</i> (PRE).                                                                                                                                                                                                                                                          |
| <i>Rhamnus alaternus</i>                       | South Africa. FREE STATE: <b>2926 (Bloemfontein)</b> : Bloemfontein arboretum, (-AA), 2 Sept. 1925, <i>Moraile 3554a</i> (BLFU).                                                                                                                                                                                                                                                                 |
| <i>Rhamnus prinoides</i>                       | South Africa. GAUTENG: <b>2528 (Pretoria)</b> : University of Pretoria, Hatfield campus, (-CC), 28 Aug. 2021, <i>Cheek 3038</i> (NH).                                                                                                                                                                                                                                                            |
| <i>Rhaphiolepis indica</i>                     | South Africa. KWAZULU-NATAL: <b>2931 (Stanger)</b> : Tongaat, Amanzimnyama Garden, (-CA), 5 Aug. 2021, <i>Cheek 3084</i> (NH).                                                                                                                                                                                                                                                                   |
| <i>Rhaphiolepis umbellata</i>                  | South Africa. GAUTENG: <b>2528 (Pretoria)</b> : Pretoria zoo, (-CA), Jul. 1943, <i>Voorendyk 9522</i> (PRE).                                                                                                                                                                                                                                                                                     |
| <i>Robinia pseudoacacia</i>                    | South Africa. GAUTENG: <b>2528 (Pretoria)</b> : Pretoria zoo, (-CA), Nov. 1954, <i>De Winter s.n.</i> (PRE).                                                                                                                                                                                                                                                                                     |
| <i>Rothmannia globosa</i>                      | South Africa. GAUTENG: <b>2528 (Pretoria)</b> : Pretoria, Springbok park, (-CA), 17 Mar. 2021, <i>Cheek 2793</i> (NH); KWAZULU-NATAL: <b>2931 (Stanger)</b> : Durban, Mitchell Park, (-CC), 25 Nov. 2021, <i>Cheek 3108</i> (NH).                                                                                                                                                                |
| <i>Sabal palmetto</i>                          | South Africa. LIMPOPO: <b>2329 (Louis Trichardt)</b> : Louis Trichardt, Palm Park, (-BB), 24 Mar. 2021, <i>Cheek 2872</i> (NH).                                                                                                                                                                                                                                                                  |
| <i>Salix bonplandiana</i>                      | South Africa. GAUTENG: <b>2528 (Pretoria)</b> : Pretoria zoo, (-CA), 15 Apr. 1970, <i>Poynton 14068</i> (PRE).                                                                                                                                                                                                                                                                                   |
| <i>Salix caprea</i>                            | South Africa. GAUTENG: <b>2528 (Pretoria)</b> : Pretoria zoo, (-CA), Nov. 1954, <i>De Winter 2155</i> (PRE); MPUMALANGA: <b>2530 (Lydenburg)</b> : Belfast arboretum plot 17, (-CA), 18 Sept. 1953, <i>Forester 10833</i> (PRE).                                                                                                                                                                 |
| <i>Salix cinerea</i>                           | South Africa. MPUMALANGA: <b>2530 (Lydenburg)</b> : Belfast arboretum, (-CA), Apr. 1922, <i>Robertson 4123</i> (PRE).                                                                                                                                                                                                                                                                            |
| <i>Salix mucronata</i> subsp. <i>mucronata</i> | South Africa. GAUTENG: <b>2528 (Pretoria)</b> : Pretoria, Austin Roberts bird sanctuary, (-CC), 27 Aug. 2021, <i>Cheek 3021</i> (NH).                                                                                                                                                                                                                                                            |
| <i>Salix purpurea</i>                          | South Africa. MPUMALANGA: <b>2530 (Lydenburg)</b> : Belfast arboretum plot 1, (-CA), 7 Feb. 1953, <i>Loveday 10692</i> (PRE).                                                                                                                                                                                                                                                                    |



|                                                         |                                                                                                                                                                                                                                                                                                                                                                                                                                                                                                                                                                                                                                                                                                                                                                                                                                                                                                                                                                                                                                       |
|---------------------------------------------------------|---------------------------------------------------------------------------------------------------------------------------------------------------------------------------------------------------------------------------------------------------------------------------------------------------------------------------------------------------------------------------------------------------------------------------------------------------------------------------------------------------------------------------------------------------------------------------------------------------------------------------------------------------------------------------------------------------------------------------------------------------------------------------------------------------------------------------------------------------------------------------------------------------------------------------------------------------------------------------------------------------------------------------------------|
| <i>Sambucus nigra</i>                                   | South Africa. GAUTENG: <b>2528 (Pretoria)</b> : LC de Villiers dam at UP sports centre, (-CC), 7 Jan. 1999, <i>Siebert &amp; Du Plessis</i> 526 (PRU).                                                                                                                                                                                                                                                                                                                                                                                                                                                                                                                                                                                                                                                                                                                                                                                                                                                                                |
| <i>Sannantha pluriflora</i>                             | South Africa. LIMPOPO: <b>2329 (Tzaneen)</b> : Magoebaskloof, Cheerio Gardens, (-CC), 25 Mar. 2021, <i>Cheek</i> 2880 (NH).                                                                                                                                                                                                                                                                                                                                                                                                                                                                                                                                                                                                                                                                                                                                                                                                                                                                                                           |
| <i>Sapindus saponaria</i>                               | South Africa. FREE STATE: <b>2926 (Bloemfontein)</b> : Bloemfontein arboretum, (-AA), Feb. 1929, <i>Forester</i> 7263 (PRE).                                                                                                                                                                                                                                                                                                                                                                                                                                                                                                                                                                                                                                                                                                                                                                                                                                                                                                          |
| <i>Schinus molle</i>                                    | South Africa. FREE STATE: <b>2926 (Bloemfontein)</b> : Bloemfontein, Happy Valley conservation area, (-AA), 30 Dec. 2019, <i>Cheek</i> 2751 (NH).                                                                                                                                                                                                                                                                                                                                                                                                                                                                                                                                                                                                                                                                                                                                                                                                                                                                                     |
| <i>Schinus terebinthifolius</i> var. <i>acutifolius</i> | South Africa. GAUTENG: <b>2528 (Pretoria)</b> : Pretoria zoo, (-CA), Jul. 1943, <i>Voorendyk</i> 9519 (PRE).                                                                                                                                                                                                                                                                                                                                                                                                                                                                                                                                                                                                                                                                                                                                                                                                                                                                                                                          |
| <i>Schotia latifolia</i>                                | South Africa. GAUTENG: <b>2528 (Pretoria)</b> : Union Buildings, Flanagan arboretum, (-CA), 23 Aug. 2021, <i>Cheek</i> 2977 (NH).                                                                                                                                                                                                                                                                                                                                                                                                                                                                                                                                                                                                                                                                                                                                                                                                                                                                                                     |
| <i>Scutia myrtina</i>                                   | South Africa. GAUTENG: <b>2528 (Pretoria)</b> : Pretoria national botanic garden, Arboretum section, (-CB), 26 Aug. 2021, <i>Cheek</i> 3002 (NH).                                                                                                                                                                                                                                                                                                                                                                                                                                                                                                                                                                                                                                                                                                                                                                                                                                                                                     |
| <i>Searsia lancea</i>                                   | South Africa. GAUTENG: <b>2528 (Pretoria)</b> : Pretoria, Springbok park, (-CA), 17 Mar. 2021, <i>Cheek</i> 2798 (NH); Austin Roberts bird sanctuary, (-CC), 27 Aug. 2021, <i>Cheek</i> 3022 (NH); Pretoria national botanic garden, (-CB), 25 Aug. 2021, <i>Cheek</i> 2995 (NH); University of Pretoria, Hatfield campus, (-CC), 28 Aug. 2021, <i>Cheek</i> 3033 (NH); FREE STATE: <b>2827 (Senekal)</b> : Senekal, NG church garden, (-BC), 16 May 2021, <i>Cheek</i> 2910 (NH); <b>2926 (Bloemfontein)</b> : Bloemfontein main drive, arboretum, (-AA), 6 Mar. 1923, <i>Toerien</i> 4959 (PRE).                                                                                                                                                                                                                                                                                                                                                                                                                                    |
| <i>Searsia pyroides</i>                                 | South Africa. GAUTENG: <b>2528 (Pretoria)</b> : University of Pretoria, Hatfield campus, (-CC), 28 Aug. 2021, <i>Cheek</i> 3032 (NH).                                                                                                                                                                                                                                                                                                                                                                                                                                                                                                                                                                                                                                                                                                                                                                                                                                                                                                 |
| <i>Senegalia ataxacantha</i>                            | South Africa. GAUTENG: <b>2528 (Pretoria)</b> : Pretoria, Springbok park, (-CA), 17 Mar. 2021, <i>Cheek</i> 2792 (NH); Pretoria, Jan Cilliers park, (-CC), 17 Mar. 2021, <i>Cheek</i> 2816 (NH); Pretoria national botanic garden, (-CB), 26 Aug. 2021, <i>Cheek</i> 3001 (NH).                                                                                                                                                                                                                                                                                                                                                                                                                                                                                                                                                                                                                                                                                                                                                       |
| <i>Senegalia burkei</i>                                 | GAUTENG: <b>2528 (Pretoria)</b> : Pretoria, Jan Cilliers Park, (-CC), 17 Mar. 2021, <i>Cheek</i> 2820 (NH).                                                                                                                                                                                                                                                                                                                                                                                                                                                                                                                                                                                                                                                                                                                                                                                                                                                                                                                           |
| <i>Senegalia caffra</i>                                 | South Africa. GAUTENG: <b>2528 (Pretoria)</b> : Pretoria, Jan Cilliers Park, (-CC), 17 Mar. 2021, <i>Cheek</i> 2821 (NH); Pretoria, Austin Roberts bird sanctuary, (-CC), 27 Aug. 2021, <i>Cheek</i> 3024 (NH).                                                                                                                                                                                                                                                                                                                                                                                                                                                                                                                                                                                                                                                                                                                                                                                                                       |
| <i>Senna multijuga</i>                                  | South Africa. MPUMALANGA: <b>2530 (Lydenburg)</b> : Sabie, D.R. de Wet For. Res. Sta. arboretum, (-BB), 23 Feb. 1973, <i>Drummond</i> 95 (GLOW).                                                                                                                                                                                                                                                                                                                                                                                                                                                                                                                                                                                                                                                                                                                                                                                                                                                                                      |
| <i>Sequoia sempervirens</i>                             | South Africa. LIMPOPO: <b>2330 (Tzaneen)</b> : Woodbush arboretum, (-CC), Jul. 1944, <i>Loock</i> 9705 (PRE); MPUMALANGA: <b>2530 (Lydenburg)</b> : Sabie, Bergvliet plantation, D.R. de Wet arboretum, (-BB), 13 Jul. 2014, <i>Cheek</i> 2063 (NH). KWAZULU-NATAL: <b>2930 (Pietermaritzburg)</b> : Howick, Benvie arboretum, (-AD), 13 Aug. 2015, <i>Cheek</i> 2347 (NH); KWAZULU-NATAL: <b>2929 (Underberg)</b> : Himeville, Kenmo Lake arboretum, (-DA), 15 Sept. 2021, <i>Cheek</i> 3058 (NH); <b>3029 (Port Shepstone)</b> : Kokstad, Weza plantation, Blackwater arboretum, (-DA), 26 Sept. 2012, <i>Cheek</i> 1434 (NH); WESTERN CAPE: <b>3323 (Oudtshoorn)</b> : Storms River, Lottering plantation, Bloukrans arboretum, (-DC), 16 May, 2013, <i>Cheek</i> 1692 (NH). <b>3322 (Oudtshoorn)</b> : George, Saasveld forestry college, Saasveld arboretum, (-DC), 23 Jan. 2014, <i>Cheek</i> 1951 (NH); EASTERN CAPE: <b>3226 (Fort Beaufort)</b> : Hogsback, Hogsback arboretum, (-DB), 17 Nov. 2014, <i>Cheek</i> 2410 (NH). |
| <i>Serenoa repens</i>                                   | KWAZULU-NATAL: <b>3030 (Port Shepstone)</b> : Uvongo, Skyline Arboretum, (-CD), 3 Mar. 2022, <i>Cheek</i> 3149 (NH).                                                                                                                                                                                                                                                                                                                                                                                                                                                                                                                                                                                                                                                                                                                                                                                                                                                                                                                  |
| <i>Sideroxylon inerme</i>                               | South Africa. EASTERN CAPE: <b>3325 (Port Elizabeth)</b> : Victoria Park, (-DC), 14 Jun. 2021, <i>Cheek</i> 2953 (NH).                                                                                                                                                                                                                                                                                                                                                                                                                                                                                                                                                                                                                                                                                                                                                                                                                                                                                                                |
| <i>Smodingium argutum</i>                               | GAUTENG: <b>2528 (Pretoria)</b> : Pretoria, Jan Cilliers Park, (-CC), 17 Mar. 2021, <i>Cheek</i> 2807 (NH).                                                                                                                                                                                                                                                                                                                                                                                                                                                                                                                                                                                                                                                                                                                                                                                                                                                                                                                           |
| <i>Spathodea campanulata</i>                            | South Africa. Limpopo: <b>2329 (Pietersburg)</b> : Louis Trichardt, Tree Park, (-BB), 24 Mar. 2021, <i>Cheek</i> 2902 (NH).                                                                                                                                                                                                                                                                                                                                                                                                                                                                                                                                                                                                                                                                                                                                                                                                                                                                                                           |
| <i>Stemmadenia bella</i>                                | South Africa. KWAZULU-NATAL: <b>2931 (Stanger)</b> : Tongaat, Amanzimnyama Garden, (-CA), 29 Jul. 2021, <i>Cheek</i> 3079 (NH).                                                                                                                                                                                                                                                                                                                                                                                                                                                                                                                                                                                                                                                                                                                                                                                                                                                                                                       |
| <i>Stenocarpus sinuatus</i>                             | South Africa. GAUTENG: <b>2528 (Pretoria)</b> : Pretoria zoo, (-CA), n.d., <i>De Winter s.n.</i> (PRE); MPUMALANGA: <b>2530 (Lydenburg)</b> : Sabie, Bergvliet plantation, D.R. de Wet arboretum, (-BB), 13 Jul. 2014, <i>Cheek</i> 2055 (NH).                                                                                                                                                                                                                                                                                                                                                                                                                                                                                                                                                                                                                                                                                                                                                                                        |

|                                                  |                                                                                                                                                                                                                                                                                                                                                                                                                                                                                               |
|--------------------------------------------------|-----------------------------------------------------------------------------------------------------------------------------------------------------------------------------------------------------------------------------------------------------------------------------------------------------------------------------------------------------------------------------------------------------------------------------------------------------------------------------------------------|
| <i>Sterculia murex</i>                           | South Africa. LIMPOPO: <b>2230 (Messina)</b> : Louis Trichardt, Hanglip arboretum, (-CD), 11 Sept. 2014, <i>Cheek 2124</i> (NH); GAUTENG: <b>2528 (Pretoria)</b> : Pretoria, Jan Cilliers Park, (-CC), 17 Mar. 2021, <i>Cheek 2805</i> (NH).                                                                                                                                                                                                                                                  |
| <i>Syagrus romanzoffiana</i>                     | South Africa. LIMPOPO: <b>2329 (Pietersburg)</b> : Louis Trichardt, Palm park, (-BB), 24 Mar. 2021, <i>Cheek 2869</i> (NH).                                                                                                                                                                                                                                                                                                                                                                   |
| <i>Syncarpia glomulifera</i>                     | South Africa. LIMPOPO: <b>2230 (Messina)</b> : Louis Trichardt, Hanglip arboretum, (-CD), 11 Sept. 2014, <i>Cheek 2125</i> (NH); KWAZULU-NATAL: <b>3030 (Port Shepstone)</b> : Uvongo, Skyline Arboretum, (-CD), 3 Mar. 2022, <i>Cheek 3145</i> (NH).                                                                                                                                                                                                                                         |
| <i>Syncarpia hillii</i>                          | South Africa. KWAZULU-NATAL: <b>3029 (Kokstad)</b> : Border arboretum plot K8b, (-DA), Oct. 1964, Haigh 2409 (PRE).                                                                                                                                                                                                                                                                                                                                                                           |
| <i>Syzygium cordatum</i>                         | South Africa. GAUTENG: <b>2528 (Pretoria)</b> : Pretoria, Jan Cilliers park, (-CC), 17 Mar. 2021, <i>Cheek 2809</i> (NH).                                                                                                                                                                                                                                                                                                                                                                     |
| <i>Syzygium gerrardii</i>                        | South Africa. KWAZULU-NATAL: <b>2930 (Pietermaritzburg)</b> : Pietermaritzburg, KZN botanical gardens, (-CB), 24 Jan. 2020, <i>Cheek 2759</i> (NH).                                                                                                                                                                                                                                                                                                                                           |
| <i>Syzygium jambos</i>                           | South Africa. WESTERN CAPE: <b>3418 (Simons Town)</b> : Cape Town, Tokai arboretum, (-AB), 22 Mar. 2018, <i>Cheek 2712</i> (NH).                                                                                                                                                                                                                                                                                                                                                              |
| <i>Tabebuia aurea</i>                            | KWAZULU-NATAL: <b>2931 (Stanger)</b> : Tongaat, Amanzimnyama Garden, (-CA), 25 Nov. 2021, <i>Cheek 3101</i> (NH).                                                                                                                                                                                                                                                                                                                                                                             |
| <i>Tabernaemontana elegans</i>                   | South Africa. GAUTENG: <b>2528 (Pretoria)</b> : Pretoria national botanic garden, Arboretum section, (-CB), 27 Aug. 2021, <i>Cheek 3003</i> (NH).                                                                                                                                                                                                                                                                                                                                             |
| <i>Taiwania cryptomeroides</i>                   | South Africa. KWAZULU-NATAL: <b>2930 (Pietermaritzburg)</b> : Howick, Benvie arboretum, (-AD), 23 Nov. 2021, <i>Cheek 3097</i> (NH).                                                                                                                                                                                                                                                                                                                                                          |
| <i>Tara spinosa</i>                              | South Africa. LIMPOPO: <b>2229 (Waterpoort)</b> : Hanglip plantation arboretum plot 40, (-DD), 5 Jun. 1961, <i>Poynton 11961</i> (PRE).                                                                                                                                                                                                                                                                                                                                                       |
| <i>Taxodium distichum</i>                        | South Africa. LIMPOPO: <b>2329 (Pietersburg)</b> : Haenertsburg, Sequoia Stay Gardens, (-DD), 20 Sept. 2019, <i>Cheek 2673</i> (PRE); GAUTENG: <b>2528 (Pretoria)</b> : Pretoria zoo, (-CA), Nov. 1954, <i>De Winter 2129</i> (PRE); KWAZULU-NATAL: <b>2930 (Pietermaritzburg)</b> : Pietermaritzburg, KZN botanical gardens, (-CB), 24 Jan. 2020, <i>Cheek 2763</i> (NH); EASTERN CAPE: <b>3326 (Grahamstown)</b> : Grahamstown botanic garden, (-BC), 15 June 2021, <i>Cheek 2947</i> (NH). |
| <i>Taxodium distichum</i> var. <i>imbricatum</i> | South Africa. LIMPOPO: <b>2230 (Tzaneen)</b> : Woodbush arboretum, (-CC), Feb. 1952, <i>Van Rensburg 10455</i> (PRE); GAUTENG: <b>2528 (Pretoria)</b> : Pretoria zoo, (-CA), Jan. 1944, <i>Voorendyk 9607</i> (PRE).                                                                                                                                                                                                                                                                          |
| <i>Taxus baccata</i>                             | South Africa. GAUTENG: <b>2528 (Pretoria)</b> : Pretoria zoo, (-CA), 1945, <i>Loock 10000</i> (PRE).                                                                                                                                                                                                                                                                                                                                                                                          |
| <i>Tecomaria capensis</i>                        | South Africa. GAUTENG: <b>2528 (Pretoria)</b> : Pretoria, Springbok park, (-CA), 17 Mar. 2021, <i>Cheek 2787</i> (NH).                                                                                                                                                                                                                                                                                                                                                                        |
| <i>Terminalia chebula</i>                        | South Africa. LIMPOPO: <b>2330 (Tzaneen)</b> : Klein Australië, Hill 20 arboretum. (-AA), 9 Jun. 1936, <i>Kotze 8945</i> (PRE).                                                                                                                                                                                                                                                                                                                                                               |
| <i>Terminalia sericea</i>                        | South Africa. GAUTENG: <b>2528 (Pretoria)</b> : Pretoria, Jan Cilliers park, (-CC), 17 Mar. 2021, <i>Cheek 2802</i> (NH).                                                                                                                                                                                                                                                                                                                                                                     |
| <i>Tetraclinis articulata</i>                    | South Africa. WESTERN CAPE: <b>3319 (Worcester)</b> : Robertson arboretum, (-DD), 25 Sept. 1923, <i>Kotze 5519</i> (PRE).                                                                                                                                                                                                                                                                                                                                                                     |
| <i>Thuja plicata</i>                             | South Africa. EASTERN CAPE: <b>3227 (Stutterheim)</b> : Kubusie plantation, Evelyn Valley arboretum, (-CA), 13 Jan. 2013, <i>Cheek 1545</i> (NH).                                                                                                                                                                                                                                                                                                                                             |
| <i>Tilia americana</i>                           | South Africa. MPUMALANGA: <b>2530 (Lydenburg)</b> : Belfast arboretum, (-CA), Feb. 1931, <i>Anon. 7734</i> (PRE).                                                                                                                                                                                                                                                                                                                                                                             |
| <i>Tilia x europaea</i>                          | South Africa. MPUMALANGA: <b>2530 (Lydenburg)</b> : Belfast arboretum, (-CA), Oct. 1930, <i>Anon. 7735</i> (PRE); KWAZULU-NATAL: <b>2929 (Underberg)</b> : Nottingham Road, Clifton Preparatory School, (-BD), 24 Feb. 2022, <i>Cheek 3123</i> (NH).                                                                                                                                                                                                                                          |
| <i>Tilia monticola</i>                           | South Africa. MPUMALANGA: <b>2530 (Lydenburg)</b> : Belfast arboretum, (-CA), Apr. 1922, <i>Lotze 4073</i> (PRE).                                                                                                                                                                                                                                                                                                                                                                             |
| <i>Tipuana tipu</i>                              | South Africa. GAUTENG: <b>2528 (Pretoria)</b> : Pretoria zoo, (-CA), Nov. 1954, <i>De Winter 2125</i> (PRE); MPUMALANGA: <b>2530 (Lydenburg)</b> : Sabie, D.R. de Wet For. Res. Sta. arboretum, (-BB), 12 Nov.                                                                                                                                                                                                                                                                                |

|                                                 |                                                                                                                                                                                                                                                                                                                                                                                                           |
|-------------------------------------------------|-----------------------------------------------------------------------------------------------------------------------------------------------------------------------------------------------------------------------------------------------------------------------------------------------------------------------------------------------------------------------------------------------------------|
|                                                 | 1972, <i>Kruger 4</i> (GLOW); WESTERN CAPE: <b>3418 (Simons Town)</b> : Tokai, plot 1 of arboretum in compartment A6, (-AB), Jan. 1917, <i>King 2328</i> (PRE).                                                                                                                                                                                                                                           |
| <i>Toona ciliata</i>                            | South Africa. LIMPOPO: <b>2230 (Messina)</b> : Louis Trichardt, Entabeni plantation, Hill 20 arboretum, (-AA), 12 Sept. 2014, <i>Cheek 2139</i> (NH), 30 Jun. 2018, <i>Cheek 2610</i> (PRE); Entabeni lower arboretum, (-AA), 12 Sept. 2014, <i>Cheek 2143</i> (NH). MPUMALANGA: <b>2330 (Tzaneen)</b> : Tzaneen, J.D.M. Keet arboretum, (-CC), 14 Sept. 2014, <i>Cheek 2169</i> (NH).                    |
| <i>Trachycarpus fortunei</i>                    | South Africa. GAUTENG: <b>2528 (Pretoria)</b> : University of Pretoria, Hatfield campus, (-CC), 28 Aug. 2021, <i>Cheek 3046</i> (NH); KWAZULU-NATAL: <b>2929 (Underberg)</b> : Kenmo Lake arboretum, (-DA), 15 Sept. 2021, <i>Cheek 3061</i> (NH).                                                                                                                                                        |
| <i>Trichilia dregeana</i>                       | South Africa. GAUTENG: <b>2528 (Pretoria)</b> : Pretoria, Jan Cilliers park, (-CC), 17 Mar. 2021, <i>Cheek 2815</i> (NH); KWAZULU-NATAL: <b>2931 (Stanger)</b> : Tongaat, Amanzimnyama Garden, (-CA), 25 Nov. 2021, <i>Cheek 3099</i> (NH).                                                                                                                                                               |
| <i>Ulmus carpiniifolia</i>                      | South Africa. GAUTENG: <b>2528 (Pretoria)</b> : Pretoria zoo, (-CA), 1954, <i>De Winter s.n.</i> (PRE).                                                                                                                                                                                                                                                                                                   |
| <i>Ulmus minor</i> 'Dampieri Aurea'             | South Africa. GAUTENG: <b>2528 (Pretoria)</b> : Pretoria zoo, (-CA), Nov. 1954, <i>De Winter 2161</i> (PRE).                                                                                                                                                                                                                                                                                              |
| <i>Ulmus parviflora</i>                         | South Africa. GAUTENG: <b>2528 (Pretoria)</b> : Irene dairy farm, (-CC), 21 Mar. 2021, <i>Cheek 2856</i> (NH); Pretoria zoo, (-CA), Nov. 1954, <i>De Winter 2162</i> (PRE); MPUMALANGA: <b>2530 (Lydenburg)</b> : Belfast arboretum, (-CA), 2 Apr. 1922, <i>Kotze 4096</i> (PRE); KWAZULU-NATAL: <b>2930 (Pietermaritzburg)</b> : Cedara, Cedara arboretum, (-CB), 13 Mar. 2012, <i>Cheek 1239</i> (NH).  |
| <i>Umtiza listeriana</i>                        | South Africa. WESTERN CAPE: <b>3418 (Simons Town)</b> : Tokai, tree no. 922, main arboretum, (-AB), Oct. 1962, <i>Van Rensburg 11127</i> (PRE).                                                                                                                                                                                                                                                           |
| <i>Vachellia erioloba</i>                       | South Africa. GAUTENG: <b>2528 (Pretoria)</b> : Pretoria national botanic garden, (-CB), 26 Aug. 2021, <i>Cheek 3000</i> (NH);                                                                                                                                                                                                                                                                            |
| <i>Vachellia farnesiana</i>                     | South Africa. GAUTENG: <b>2528 (Pretoria)</b> : University of Pretoria, Hatfield campus, (-CC), 28 Aug. 2021, <i>Cheek 3070</i> (NH).                                                                                                                                                                                                                                                                     |
| <i>Vachellia nilotica</i>                       | WESTERN CAPE: <b>3318 (Cape Town)</b> : Leeuwenhof estate, (-CD), 9 June 2021, <i>Cheek 2918</i> (NH).                                                                                                                                                                                                                                                                                                    |
| <i>Vachellia robusta</i>                        | South Africa. GAUTENG: <b>2528 (Pretoria)</b> : Pretoria, Jan Cilliers park, (-CC), 17 Mar. 2021, <i>Cheek 2806</i> (NH).                                                                                                                                                                                                                                                                                 |
| <i>Vernicia fordii</i>                          | South Africa. LIMPOPO: <b>2329 (Pietersburg)</b> : Haenertsburg, Sequoia Stay Gardens, (-DD), 20 Sept. 2019, <i>Cheek 2679</i> (NH)                                                                                                                                                                                                                                                                       |
| <i>Viburnum plicatum</i> var. <i>tomentosum</i> | South Africa. GAUTENG: <b>2528 (Pretoria)</b> : Pretoria zoo, (-CA), Jul. 1943, <i>Voorendyk 9518</i> (PRE).                                                                                                                                                                                                                                                                                              |
| <i>Viburnum suspensum</i>                       | South Africa. GAUTENG: <b>2528 (Pretoria)</b> : University of Pretoria, Hatfield campus, (-CC), 28 Aug. 2021, <i>Cheek 3036</i> (NH); WESTERN CAPE: <b>3318 (Cape Town)</b> : Cape Town, Leeuwenhof Estate, (-CD), 9 Jun. 2021, <i>Cheek 2926</i> (NH).                                                                                                                                                   |
| <i>Viburnum tinus</i>                           | South Africa. GAUTENG: <b>2528 (Pretoria)</b> : Pretoria zoo, (-CA), Jul. 1943, <i>Voorendyk 9523</i> (PRE); FREE STATE: <b>2827 (Senekal)</b> : Senekal, NG church garden, (-BC), 16 May 2021, <i>Cheek 2911</i> (NH); WESTERN CAPE: <b>3419 (Caledon)</b> : Grabouw, Elgin, Fruitways Farm, Eikenhof arboretum, (-AA), 11 Jun. 2021, <i>Cheek 2939</i> (NH)                                             |
| <i>Virgilia divaricata</i>                      | South Africa. WESTERN CAPE: <b>3419 (Caledon)</b> : Grabouw, Elgin, Fruitways farm, Eikenhof arboretum, (-AA), 11 Jun. 2021, <i>Cheek 2934</i> (NH).                                                                                                                                                                                                                                                      |
| <i>Virgilia oroboides</i>                       | South Africa. KWAZULU-NATAL: <b>2930 (Pietermaritzburg)</b> : Cedara, Cedara arboretum, (-CB), 14 Mar. 2012, <i>Cheek 2176</i> (NH); WESTERN CAPE: <b>3318 (Cape Town)</b> : Table Mountain, Nursery Ravine, (-CD), 27 May 2016, <i>Cheek 2564</i> (NBG).                                                                                                                                                 |
| <i>Vitis vinifera</i>                           | South Africa. EASTERN CAPE: <b>3224 (Graaff-Reinet)</b> : Graaff-Reinet, Reinet House, rear courtyard, (-BC), 17 Jun. 2021, <i>Cheek 2938</i> (NH).                                                                                                                                                                                                                                                       |
| <i>Widdringtonia cederbergensis</i>             | South Africa. WESTERN CAPE: <b>3419 (Caledon)</b> : Grabouw, Elgin, Fruitways farm, Eikenhof arboretum, (-AA), 11 Jun. 2021, <i>Cheek 2933</i> (NH).                                                                                                                                                                                                                                                      |
| <i>Widdringtonia nodiflora</i>                  | South Africa. LIMPOPO: <b>2230 (Tzaneen)</b> : Woodbush arboretum, (-CC), 24 Oct. 1917, <i>Kotze 2507</i> (PRE); GAUTENG: <b>2528 (Pretoria)</b> : Jan Cilliers Park, (-CC), 17 Mar. 2021, <i>Cheek 2804</i> (NH); Pretoria national botanic garden, (-CB), 26 Aug. 2021, <i>Cheek 3010</i> (NH); WESTERN CAPE: <b>3319 (Worcester)</b> : Robertson arboretum, (-DD), Apr. 1906, <i>Anon. 1075</i> (PRE). |
| <i>Widdringtonia schwarzii</i>                  | South Africa. GAUTENG: <b>2528 (Pretoria)</b> : Pretoria national botanic garden, (-CB), 26 Aug. 2021, <i>Cheek 2980</i> (NH).                                                                                                                                                                                                                                                                            |

|                                              |                                                                                                                                                                                                                               |
|----------------------------------------------|-------------------------------------------------------------------------------------------------------------------------------------------------------------------------------------------------------------------------------|
| <i>Wisteria floribunda</i>                   | South Africa. LIMPOPO: <b>2329 (Tzaneen)</b> : Magoebaskloof, Cheerio Gardens, (-CC), 25 Mar. 2021, <i>Cheek</i> 2895 (NH); GAUTENG: <b>2528 (Pretoria)</b> : Irene dairy farm, (-CC), 21 Mar. 2021, <i>Cheek</i> 2851 (NH).  |
| <i>x Hesperotropis leylandii</i>             | South Africa. KWAZULU-NATAL: <b>2929 (Underberg)</b> : Kenmo Lake arboretum, (-DA), 15 Sept. 2021, <i>Cheek</i> 3060 (NH); Nottingham Road, Clifton Preparatory School, (-BD), 24 Feb. 2022, <i>Cheek</i> 3129 (NH).          |
| <i>x Ruttyruspolia 'Phyllis van Heerden'</i> | South Africa. GAUTENG: <b>2628 (Johannesburg)</b> : Johannesburg botanical garden, (-AA), 16 Feb 1979, <i>McMurtry</i> 2998 (JBG).                                                                                            |
| <i>Zelkova serrata</i>                       | South Africa. LIMPOPO: <b>2330 (Tzaneen)</b> : Klein Australië arboretum plot 126, (-AA), 20 Jan. 1984, <i>Poynton</i> 18326 (PRE); GAUTENG: <b>2528 (Pretoria)</b> : Pretoria zoo, (-CA), 1954, <i>De Winter s.n.</i> (PRE). |

**Table S2:** Sources of the nomenclatural deviations from Tropicos.org (2020), arranged alphabetically according to the first field

| Name from source                          | Tropicos.org epithet                                                  | Accepted epithet                                         | Reference                                                                                                                                                                                                                                                                                                                |
|-------------------------------------------|-----------------------------------------------------------------------|----------------------------------------------------------|--------------------------------------------------------------------------------------------------------------------------------------------------------------------------------------------------------------------------------------------------------------------------------------------------------------------------|
| <i>Acacia erioloba</i>                    | <i>Vachellia erioloba</i> (E.Mey.) Seigler & Ebinger                  | <i>Vachellia erioloba</i> (E.Mey.) P.J.H.Hurter          | Kyalingalilwa B, Boatwright JS, Daru BH, Maurin O, Van der Bank M. 2013. Phylogenetic position and revised classification of <i>Acacia</i> s.l. (Fabaceae: Mimosoideae) in Africa, including new combinations in <i>Vachellia</i> and <i>Senegalia</i> . <i>Botanical Journal of the Linnean Society</i> 172: 500 – 523. |
| <i>Acacia robusta</i>                     | No data                                                               | <i>Vachellia robusta</i> (Burch.) Kyal. & Boatwr.        | Kyalingalilwa B, Boatwright JS, Daru BH, Maurin O, Van der Bank M. 2013. Phylogenetic position and revised classification of <i>Acacia</i> s.l. (Fabaceae: Mimosoideae) in Africa, including new combinations in <i>Vachellia</i> and <i>Senegalia</i> . <i>Botanical Journal of the Linnean Society</i> 172: 500 – 523. |
| <i>Bequaertiodendron magaliesmontanum</i> | <i>Bequaertiodendron magaliesmontanum</i> (Sond.) Heine & J.H. Hemsl. | <i>Englerophytum magaliesmontanum</i> (Sond.) T.D. Penn. | Pennington, TD. 1991. <i>The genera of the Sapotaceae</i> . Royal Botanic Gardens, Kew.                                                                                                                                                                                                                                  |
| <i>Calliandra portoricensis</i>           | <i>Calliandra portoricensis</i> (Jacq.) Benth.                        | <i>Zapoteca portoricensis</i> (Benth.) H.M.Hern.         | Hernández HM. 1989. Systematics of <i>Zapoteca</i> (Leguminosae). <i>Annals of Missouri Botanical Garden</i> 76: 781 – 862.                                                                                                                                                                                              |
| <i>Cassinopsis ilicifolia</i>             | <i>Cassinopsis ilicifolia</i> Hochst.                                 | <i>Cassinopsis ilicifolia</i> (Hochst.) Kuntze           | Mendes EJ. 1963. Icacinaceae. <i>Flora Zambesiaca</i> 2: 341 – 342.                                                                                                                                                                                                                                                      |
| <i>Cassine papillosa</i>                  | <i>Cassine papillosa</i>                                              | <i>Elaeodendron papillosa</i>                            | Archer R.A, Van Wyk A.E., 1997. A taxonomic revision of <i>Cassine</i> L. s. str. (Cassinioideae: Celastraceae). <i>South African Journal of Botany</i> 63: 146 – 157.                                                                                                                                                   |
| <i>Cassine reticulata</i>                 | <i>Cassine reticulata</i>                                             | <i>Lauridia reituculata</i>                              | Archer R.A, Van Wyk A.E., 1997. A taxonomic revision of <i>Cassine</i> L. s. str. (Cassinioideae: Celastraceae). <i>South African Journal of Botany</i> 63: 146 – 157.                                                                                                                                                   |
| <i>Casuarina littoralis</i> Salisb.       | <i>Casuarina littoralis</i> Salisb.                                   | <i>Allocasuarina littoralis</i> (Salisb.) L.A.S. Johnson | Wilson, K.L., Johnson L.A.S., 1989. Casuarinaceae. <i>Flora of Australia</i> 3: 148.                                                                                                                                                                                                                                     |
| <i>Citharexylum quadrangulare</i>         | <i>Citharexylum quadrangulare</i> Jacq.                               | <i>Citharexylum spinosum</i> L.                          | Glen HF. 2002. <i>Cultivated plants of southern Africa: names, common names, literature</i> . Pretoria: Jacana.                                                                                                                                                                                                          |
| <i>Citrus sinensis</i> (L.) Osbeck        | <i>Citrus maxima</i> (Burrm.) Merr.                                   | <i>Citrus sinensis</i> (L.) Osbeck                       | Glen HF. 2002. <i>Cultivated plants of southern Africa: names, common names, literature</i> . Pretoria: Jacana.                                                                                                                                                                                                          |
| <i>Citrus x aurantium</i>                 | No data                                                               | <i>Citrus x aurantium</i> L.                             | POWO. 2022. Plants of the World Online. Facilitated by the Royal Botanic Gardens, Kew. <a href="http://www.plantsoftheworldonline.org/">http://www.plantsoftheworldonline.org/</a> . [Date accessed: 25 January 2022].                                                                                                   |
| <i>Commiphora viminea</i>                 | <i>Commiphora merkeri</i> Engl.                                       | <i>Commiphora viminea</i> Burtt Davy                     | Germishuizen G, Meyer N.L, Steenkamp Y, Keith M. 2006. <i>A checklist of South African Plants</i> . Southern African Botanical Diversity Network Report No. 41. SABONET, Pretoria.                                                                                                                                       |
| <i>Crataegus lavalleyi</i>                | No data                                                               | <i>Crataegus x lavalleyi</i> Henricq ex Lavallée         | POWO. 2022. Plants of the World Online. Facilitated by the Royal Botanic Gardens, Kew. <a href="http://www.plantsoftheworldonline.org/">http://www.plantsoftheworldonline.org/</a> . [Date accessed: 25 January 2022].                                                                                                   |



| Name from source                                                      | Tropicos.org epithet                                                  | Accepted epithet                                                                   | Reference                                                                                                                                                                                                                                                                                               |
|-----------------------------------------------------------------------|-----------------------------------------------------------------------|------------------------------------------------------------------------------------|---------------------------------------------------------------------------------------------------------------------------------------------------------------------------------------------------------------------------------------------------------------------------------------------------------|
| <i>Cyathea brownii</i> Domin                                          | No data                                                               | <i>Sphaeropteris excelsa</i> (R.Br. ex Endl.) R.M.Tryon                            | Field AR. 2020. Classification and typification of Australian lycophytes and ferns based on Pteridophyte phylogeny group classification PPG 1. <i>Australian Systematic Botany</i> 33: 1 - 102.                                                                                                         |
| <i>Cyathea cooperi</i> (Hook. ex F.Muell.) Domin                      | <i>Cyathea cooperi</i> (F.Muell.) Domin                               | <i>Sphaeropteris cooperi</i> (Hook. ex F.Muell.) R.M.Tryon                         | Field AR. 2020. Classification and typification of Australian lycophytes and ferns based on Pteridophyte phylogeny group classification PPG 1. <i>Australian Systematic Botany</i> 33: 1 - 102.                                                                                                         |
| <i>Cyathea robusta</i> Holtum                                         | <i>Cyathea robusta</i> (C.Moore ex Maiden) Holtum                     | <i>Sphaeropteris robusta</i> (Holtum) R.M.Tryon                                    | Field AR. 2020. Classification and typification of Australian lycophytes and ferns based on Pteridophyte phylogeny group classification PPG 1. <i>Australian Systematic Botany</i> 33: 1 - 102.                                                                                                         |
| <i>Diospyros austro-africana</i>                                      | No data                                                               | <i>Diospyros austro-africana</i> De Winter                                         | De Winter B. 1963. Ebenaceae. <i>Flora of southern Africa</i> . 26: 54 – 99.                                                                                                                                                                                                                            |
| <i>Diospyros natalensis</i> subsp. <i>nummularia</i> (Brenan) F.White | <i>Diospyros natalensis</i> subsp. <i>nummularia</i> (Brenan) F.White | <i>Diospyros nummularia</i> Brenan                                                 | Germishuizen G, Meyer N.L, Steenkamp Y, Keith M. 2006. <i>A checklist of South African Plants</i> . Southern African Botanical Diversity Network Report No. 41. SABONET, Pretoria.                                                                                                                      |
| <i>Dombeya autumnalis</i>                                             | <i>Dombeya autumnalis</i> Verdc.                                      | <i>Dombeya autumnalis</i> I.Verd.                                                  | Germishuizen G, Meyer N.L, Steenkamp Y, Keith M. 2006. <i>A checklist of South African Plants</i> . Southern African Botanical Diversity Network Report No. 41. SABONET, Pretoria.                                                                                                                      |
| <i>Duvernoia aconitiflora</i> A.Meeuse                                | <i>Duvernoia aconitiflora</i> A.Meeuse                                | <i>Justicia aconitiflora</i> (A.Meeuse) Cubey                                      | Goldblatt P., Manning JC. 2014. Nomenclatural adjustments in African plants 1. <i>Bothalia</i> , 44(1), art. #169, 9 pages. <a href="http://dx.doi.org/10.4102/abc.v44i1.169">http://dx.doi.org/10.4102/abc.v44i1.169</a>                                                                               |
| <i>Endtandophragma caudatum</i>                                       | No data                                                               | <i>Endtandophragma caudatum</i> (Sprague) Sprague                                  | Hyde M, Wursten BT, Ballings P, Coates Palgrave M. 2021. <i>Flora of Zimbabwe</i> . <a href="https://www.zimbabweflora.co.zw">https://www.zimbabweflora.co.zw</a> . [Date accessed: 15 January 2022]                                                                                                    |
| <i>Grumilea capensis</i>                                              | <i>Psychotria capensis</i> (Eckl.) Schönland                          | <i>Psychotria capensis</i> (Eckl.) Vathe                                           | Verdcourt B. 1989. Rubiaceae. <i>Flora Zambesiaca</i> 5: 9 – 31.                                                                                                                                                                                                                                        |
| <i>Guibourtia conjugata</i>                                           | <i>Guibourtia conjugata</i> J. Léonard                                | <i>Guibourtia conjugata</i> (Bolle) J.Léonard                                      | Hyde M, Wursten BT, Ballings P, Coates Palgrave M. 2021. <i>Flora of Zimbabwe</i> . <a href="https://www.zimbabweflora.co.zw">https://www.zimbabweflora.co.zw</a> . [Date accessed: 15 January 2022]                                                                                                    |
| <i>Hibbertia volubilis</i>                                            | <i>Hibbertia volubilis</i> Andrews                                    | <i>Hibbertia scandens</i> (Willd.) Dryand                                          | Anonymous, n.d., <i>Hibbertia scandens</i> . Atlas of Living Australia. <a href="https://bie.ala.org.au/species/https://id.biodiversity.org.au/node/apni/2889161#overview">https://bie.ala.org.au/species/https://id.biodiversity.org.au/node/apni/2889161#overview</a> . [Date accessed: 9 March 2022] |
| <i>Howea forsteriana</i>                                              | <i>Howea forsteriana</i> (F.Muell. & H.Wendl.) Becc.                  | <i>Howea forsteriana</i> (C.Moore & F.Muell.) Becc.                                | Glen HF. 2002. <i>Cultivated plants of southern Africa: names, common names, literature</i> . Pretoria: Jacana.                                                                                                                                                                                         |
| <i>Hymenodictyon parvifolium</i>                                      | <i>Otiophora cupheoides</i> N.E.Br.                                   | <i>Hymenodictyon parvifolium</i> Oliv.                                             | Germishuizen G, Meyer N.L, Steenkamp Y, Keith M. 2006. <i>A checklist of South African Plants</i> . Southern African Botanical Diversity Network Report No. 41. SABONET, Pretoria.                                                                                                                      |
| <i>Livistona decipiens</i> Becc.                                      | <i>Livistona decipiens</i> Becc.                                      | <i>Livistona decora</i> (W.Bull) Dowe                                              | Dowe JL. 2009. A taxonomic account of <i>Livistona</i> R.Br. (Arecaceae). <i>Gardens' Bulliten Singapore</i> . 60: 185 – 344.                                                                                                                                                                           |
| <i>Lydenburgia abbottii</i>                                           | No data                                                               | <i>Lydenburgia abbottii</i> (A.E. van Wyk & Prins) Steenkamp, A.E. van Wyk & Prins | Germishuizen G, Meyer N.L, Steenkamp Y, Keith M. 2006. <i>A checklist of South African Plants</i> . Southern African Botanical Diversity Network Report No. 41. SABONET, Pretoria.                                                                                                                      |
| <i>Markhamia platycalyx</i>                                           | <i>Markhamia platycalyx</i> (Baker) Sprague                           | <i>Markhamia lutea</i> (Benth.) K.Schum.                                           | Bidgood, S., Verdcourt, B., Vollesen, K.A.J. 2006. Bignoniaceae. In: <i>Flora of Tropical Africa</i> , Royal Botanic Gardens, Kew.                                                                                                                                                                      |
| <i>Mespilus caroliniana</i>                                           | No data                                                               | <i>Crataegus</i> sp.                                                               | POWO. 2022. Plants of the World Online. Facilitated by the Royal Botanic Gardens, Kew. <a href="http://www.plantsoftheworldonline.org/">http://www.plantsoftheworldonline.org/</a> . [Date accessed: 25 January 2022].                                                                                  |
| <i>Mespilus cuneifolia</i>                                            | No data                                                               | <i>Crataegus punctata</i> Ehrh.                                                    | POWO. 2022. Plants of the World Online. Facilitated by the Royal Botanic Gardens, Kew. <a href="http://www.plantsoftheworldonline.org/">http://www.plantsoftheworldonline.org/</a> . [Date accessed: 25 January 2022].                                                                                  |
| <i>Mespilus lucida</i>                                                | No data                                                               | <i>Crataegus crus-galli</i> L.                                                     | POWO. 2022. Plants of the World Online. Facilitated by the Royal Botanic Gardens, Kew. <a href="http://www.plantsoftheworldonline.org/">http://www.plantsoftheworldonline.org/</a> . [Date accessed: 25 January 2022].                                                                                  |

| Name from source                                       | Tropicos.org epithet                        | Accepted epithet                                             | Reference                                                                                                                                                                                                                                                                                                                                                                               |
|--------------------------------------------------------|---------------------------------------------|--------------------------------------------------------------|-----------------------------------------------------------------------------------------------------------------------------------------------------------------------------------------------------------------------------------------------------------------------------------------------------------------------------------------------------------------------------------------|
| <i>Mespilus nigra</i>                                  | No data                                     | <i>Crataegus nigra</i> Waldst. & Kit.                        | POWO. 2022. Plants of the World Online. Facilitated by the Royal Botanic Gardens, Kew. <a href="http://www.plantsoftheworldonline.org/">http://www.plantsoftheworldonline.org/</a> . [Date accessed: 25 January 2022].                                                                                                                                                                  |
| <i>Metrosideros excelsa</i>                            | <i>Metrosideros excelsa</i> Gaertn.         | <i>Metrosideros excelsa</i> Sol. ex Gaertn.                  | Kodala PG. 2021. <i>Metrosideros excelsa</i> , in P.G. Kodala (ed.), Flora of Australia. Australian Biological Resources Study, Department of Agriculture, Water and the Environment: Canberra. <a href="https://profiles.ala.org.au/opus/foa/profile/Metrosideros%20excelsa">https://profiles.ala.org.au/opus/foa/profile/Metrosideros%20excelsa</a> [Date Accessed: 15 November 2021] |
| <i>Metrosideros tomentosus</i>                         | <i>Metrosideros tomentosa</i>               | <i>Metrosideros excelsa</i>                                  | Kodala PG. 2022. <i>Metrosideros excelsa</i> , in P.G. Kodala (ed.), Flora of Australia. Australian Biological Resources Study, Department of Agriculture, Water and the Environment: Canberra. <a href="https://profiles.ala.org.au/opus/foa/profile/Metrosideros%20excelsa">https://profiles.ala.org.au/opus/foa/profile/Metrosideros%20excelsa</a> [Date Accessed: 6 January 2022]   |
| <i>Myoporum montanum</i>                               | No data                                     | <i>Myoporum montanum</i> R.Br.                               | Busby J. 2022. <i>Myoporum montanum</i> , in (ed.), Flora of Australia. Australian Biological Resources Study, Department of Agriculture, Water and the Environment: Canberra. <a href="https://profiles.ala.org.au/opus/foa/profile/Myoporum%20montanum">https://profiles.ala.org.au/opus/foa/profile/Myoporum%20montanum</a> [Date Accessed: 6 January 2022]                          |
| <i>Mystroxydon aethiopicum</i> subsp. <i>burkeanum</i> | No data                                     | <i>Mystroxydon aethiopicum</i> subsp. <i>burkeanum</i>       | Germishuizen G, Meyer N.L, Steenkamp Y, Keith M. 2006. A checklist of South African Plants. Southern African Botanical Diversity Network Report No. 41. SABONET, Pretoria.                                                                                                                                                                                                              |
| <i>Pinus larix</i>                                     | <i>Pinus larix</i> L.                       | <i>Larix decidua</i> Mill.                                   | Farjon A. 1990. Pinaceae: drawings and descriptions of the genera <i>Abies</i> , <i>Cedrus</i> , <i>Pseudolarix</i> , <i>Keteleeria</i> , <i>Nothotsuga</i> , <i>Tsuga</i> , <i>Cathaya</i> , <i>Pseudotsuga</i> , <i>Larix</i> and <i>Picea</i> . Koeltz Scientific Books, Königstein.                                                                                                 |
| <i>Pleogynium timorense</i>                            | No data                                     | <i>Pleogynium timorense</i> (A.DC.) Leenh.                   | Jessup LW. 2020. <i>Pleogynium timorense</i> . In: Flora of Australia. Australian Biological Resources Study, Department of Agriculture, Water and the Environment, Canberra. <a href="https://profiles.ala.org.au/opus/foa/profile/Pleogynium%20timorense">https://profiles.ala.org.au/opus/foa/profile/Pleogynium%20timorense</a> [Date Accessed: 17 June 2020]                       |
| <i>Pritchardia affinis</i> Becc.                       | <i>Pritchardia affinis</i> Becc.            | <i>Pritchardia maideniana</i> Becc.                          | Dowe JL, Jones DL. 2011. Arecaceae. In: <i>Flora of Australia</i> 39: 145 – 210, Commonwealth of Australia.                                                                                                                                                                                                                                                                             |
| <i>Phoenix fariniera</i>                               |                                             | <i>Phoenix pusilla</i> Gaertn.                               | <a href="http://www.palmweb.org/">Palmweb. 2022. Palms of the world online. http://www.palmweb.org/</a> [Date accessed: 5 February 2022].                                                                                                                                                                                                                                               |
| <i>Olea europaea</i> subsp. <i>africana</i>            | <i>Olea europaea</i> subsp. <i>africana</i> | <i>Olea europaea</i> subsp. <i>cuspidata</i>                 | Green PS. 2002. A revision of <i>Olea</i> L. (Oleaceae). <i>Kew Bulletin</i> . 57: 91 – 140.                                                                                                                                                                                                                                                                                            |
| <i>Robsonodendron eucleiforme</i>                      | No data                                     | <i>Robsonodendron eucleiforme</i> (Eckl. & Zeyh.) R.H.Archer | Germishuizen G, Meyer N.L, Steenkamp Y, Keith M. 2006. A checklist of South African Plants. Southern African Botanical Diversity Network Report No. 41. SABONET, Pretoria.                                                                                                                                                                                                              |
| <i>Salix carnea</i>                                    | No data                                     | <i>Salix x carnea</i> Wn.                                    | POWO. 2022. Plants of the World Online. Facilitated by the Royal Botanic Gardens, Kew. <a href="http://www.plantsoftheworldonline.org/">http://www.plantsoftheworldonline.org/</a> . [Date accessed: 5 February 2022].                                                                                                                                                                  |
| <i>Salix undulata</i>                                  | No data                                     | <i>Salix x mollissima</i> Hoffm. ex Elwert                   | POWO. 2022. Plants of the World Online. Facilitated by the Royal Botanic Gardens, Kew. <a href="http://www.plantsoftheworldonline.org/">http://www.plantsoftheworldonline.org/</a> . [Date accessed: 5 February 2022].                                                                                                                                                                  |
| <i>Searsia batophylla</i> (Codd) Moffett               | <i>Rhus batophylla</i> Codd                 | <i>Searsia batophylla</i> (Codd) Moffett                     | Moffett RO. 2007. Name changes in the Old World <i>Rhus</i> and recognition of <i>Searsia</i> (Anacardiaceae). <i>Bothalia</i> 37: 165 – 175.                                                                                                                                                                                                                                           |
| <i>Searsia crenata</i> (Thunb.) Moffett                | <i>Rhus crenata</i> Thunb.                  | <i>Searsia crenata</i> (Thunb.) Moffett                      | Moffett RO. 2007. Name changes in the Old World <i>Rhus</i> and recognition of <i>Searsia</i> (Anacardiaceae). <i>Bothalia</i> 37: 165 – 175.                                                                                                                                                                                                                                           |
| <i>Searsia discolour</i> (E.Mey. ex Sond.) Moffett     | <i>Rhus discolour</i> E.Mey. ex Sond.       | <i>Searsia discolour</i> (E.Mey. ex Sond.) Moffett           | Moffett RO. 2007. Name changes in the Old World <i>Rhus</i> and recognition of <i>Searsia</i> (Anacardiaceae). <i>Bothalia</i> 37: 165 – 175.                                                                                                                                                                                                                                           |
| <i>Searsia dentata</i> (Thunb.) F.A.Barkley            | <i>Rhus dentata</i> (Thunb.)                | <i>Searsia dentata</i> (Thunb.) F.A.Barkley                  | Moffett RO. 2007. Name changes in the Old World <i>Rhus</i> and recognition of <i>Searsia</i> (Anacardiaceae). <i>Bothalia</i> 37: 165 – 175.                                                                                                                                                                                                                                           |
| <i>Searsia erosa</i> (Thunb.) Moffett                  | <i>Rhus erosa</i> Thunb.                    | <i>Searsia erosa</i> (Thunb.) Moffett                        | Moffett RO. 2007. Name changes in the Old World <i>Rhus</i> and recognition of <i>Searsia</i> (Anacardiaceae). <i>Bothalia</i> 37: 165 – 175.                                                                                                                                                                                                                                           |
| <i>Searsia glauca</i>                                  | <i>Rhus glauca</i> Thunb.                   | <i>Searsia glauca</i> (Thunb.) Moffett                       | Moffett RO. 2007. Name changes in the Old World <i>Rhus</i> and recognition of <i>Searsia</i> (Anacardiaceae). <i>Bothalia</i> 37: 165 – 175.                                                                                                                                                                                                                                           |

| Name from source                                        | Tropicos.org epithet                      | Accepted epithet                                                              | Reference                                                                                                                                                                                                                                                                                                                                                                                                                                                                                                                                                                                                                      |
|---------------------------------------------------------|-------------------------------------------|-------------------------------------------------------------------------------|--------------------------------------------------------------------------------------------------------------------------------------------------------------------------------------------------------------------------------------------------------------------------------------------------------------------------------------------------------------------------------------------------------------------------------------------------------------------------------------------------------------------------------------------------------------------------------------------------------------------------------|
| <i>Stadmannia oppositifolia</i> subsp. <i>rhodesica</i> | No data                                   | <i>Stadmannia oppositifolia</i> subsp. <i>rhodesica</i> Exell                 | Exell AW. 1966. Sapindaceae. <i>Flora Zambesiaca</i> , Vol 2: 494 – 543.                                                                                                                                                                                                                                                                                                                                                                                                                                                                                                                                                       |
| <i>Tarennia pavettoides</i>                             | <i>Canthium angustifolium</i> Roxb.       | <i>Tarennia pavettoides</i> (Harv.) Sim                                       | Germishuizen G, Meyer N.L, Steenkamp Y, Keith M. 2006. <i>A checklist of South African Plants</i> . Southern African Botanical Diversity Network Report No. 41. SABONET, Pretoria.                                                                                                                                                                                                                                                                                                                                                                                                                                             |
| <i>Terminalia belliptica</i>                            | No data                                   | <i>Terminalia bellirica</i> (Gaertn.) Roxb.                                   | Glen HF. 2002. <i>Cultivated plants of southern Africa: names, common names, literature</i> . Pretoria: Jacana.                                                                                                                                                                                                                                                                                                                                                                                                                                                                                                                |
| <i>Tibouchina elegans</i> (Gardner) Cogn.               | <i>Tibouchina elegans</i> (Gardner) Cogn. | <i>Pleroma elegans</i> Gardner                                                | Guimarães PJF, Michelangeli FA, Sosa K, De Santiago Gómez JR. 2020. Systematics of <i>Tibouchina</i> and allies (Melastomataceae: Melastomateae): a new taxonomic classification. <i>Taxon</i> . <a href="https://doi.org/10.1002/tax.12151">https://doi.org/10.1002/tax.12151</a>                                                                                                                                                                                                                                                                                                                                             |
| <i>Tibouchina granulosa</i> (Desr.) Cogn.               | <i>Tibouchina granulosa</i> (Desr.) Cogn. | <i>Pleroma granulorum</i> (Desr.) D.Don                                       | Guimarães PJF, Michelangeli FA, Sosa K, De Santiago Gómez JR. 2020. Systematics of <i>Tibouchina</i> and allies (Melastomataceae: Melastomateae): a new taxonomic classification. <i>Taxon</i> . <a href="https://doi.org/10.1002/tax.12151">https://doi.org/10.1002/tax.12151</a>                                                                                                                                                                                                                                                                                                                                             |
| <i>Tilia x europaea</i>                                 | No data                                   | <i>Tilia x europaea</i> L.                                                    | Glen HF. 2002. <i>Cultivated plants of southern Africa: names, common names, literature</i> . Pretoria: Jacana.                                                                                                                                                                                                                                                                                                                                                                                                                                                                                                                |
| <i>Trimeria rotundifolia</i>                            | No Data                                   | <i>Trimeria grandifolia</i> (Hochst.) Warb.                                   | POWO. 2022. Plants of the World Online. Facilitated by the Royal Botanic Gardens, Kew. <a href="http://www.plantsoftheworldonline.org/">http://www.plantsoftheworldonline.org/</a> . [Date accessed: 5 November 2020].                                                                                                                                                                                                                                                                                                                                                                                                         |
| <i>Vachellia borleae</i>                                | No data                                   | <i>Vachellia borleae</i>                                                      | Kyalangilwa B, Boatwright JS, Daru BH, Maurin O, Van der Bank M. 2013. Phylogenetic position and revised classification of <i>Acacia</i> s.l. (Fabaceae: Mimosoideae) in Africa, including new combinations in <i>Vachellia</i> and <i>Senegalia</i> . <i>Botanical Journal of the Linnean Society</i> 172: 500 – 523.                                                                                                                                                                                                                                                                                                         |
| <i>Vachellia sieberiana</i> var. <i>woodii</i>          | No data                                   | <i>Vachellia sieberiana</i> var. <i>woodii</i> (Burt Davy) Kyal. & Boatwr.    | Kyalangilwa B, Boatwright JS, Daru BH, Maurin O, Van der Bank M. 2013. Phylogenetic position and revised classification of <i>Acacia</i> s.l. (Fabaceae: Mimosoideae) in Africa, including new combinations in <i>Vachellia</i> and <i>Senegalia</i> . <i>Botanical Journal of the Linnean Society</i> 172: 500 – 523.                                                                                                                                                                                                                                                                                                         |
| <i>Vachellia tortilis</i> subsp. <i>heteracantha</i>    | No data                                   | <i>Vachellia tortilis</i> subsp. <i>heteracantha</i> (Burch.) Kyal. & Boatwr. | Kyalangilwa B, Boatwright JS, Daru BH, Maurin O, Van der Bank M. 2013. Phylogenetic position and revised classification of <i>Acacia</i> s.l. (Fabaceae: Mimosoideae) in Africa, including new combinations in <i>Vachellia</i> and <i>Senegalia</i> . <i>Botanical Journal of the Linnean Society</i> 172: 500 – 523.                                                                                                                                                                                                                                                                                                         |
| <i>Viburnum sinensis</i>                                | No data                                   | <i>Viburnum sinensis</i> Zeyh. ex Colla                                       | Glen HF. 2002. <i>Cultivated plants of southern Africa: names, common names, literature</i> . Pretoria: Jacana.                                                                                                                                                                                                                                                                                                                                                                                                                                                                                                                |
| <i>Virgilia divaricata</i>                              | <i>Virgilia oroboides</i>                 | <i>Virgilia divaricata</i> Adamson                                            | Goldblatt, P. & Manning, J. 2000. Cape plants. <i>A conspectus of the Cape flora of South Africa</i> . National Botanical Institute, Pretoria & Missouri Botanical Garden.                                                                                                                                                                                                                                                                                                                                                                                                                                                     |
| <i>Sambucus nigra</i>                                   | <i>Sambucus</i> (Viburnaceae)             | <i>Sambucus</i> (Adoxaceae)                                                   | Applequist WL 2015. A brief review of recent controversies in the taxonomy and nomenclature of <i>Sambucus nigra</i> sensu lato. <i>Acta Horticulturae</i> 1061: 25 – 33. Doi: <a href="https://doi.org/10.17660/ActaHortic.2015.1061.1">10.17660/ActaHortic.2015.1061.1</a><br><br>Chase MW, Christenhusz MJM, Fay MF, Byng JW, Judd WS, Soltis DE, Mabberley DJ, Sennikov AN, Soltis PS, Stevens PF 2016. An update of the Angiosperm Phylogeny Group classification for the orders and families of flowering plants: APG IV. 181: 1 – 20. <a href="https://doi.org/10.1111/boj.12385">https://doi.org/10.1111/boj.12385</a> |

**Table S3:** Database of arboreta in South Africa as of March 2022: *Please refer to the Excel file on the same link.***Table S4:** Woody plant taxa recorded at 121 arboreta in South Africa: *Please refer to the Excel file on the same link.*

**Table S5:** The frequency with which the various biogeographic regions are represented by taxa in South African arboreta, historically and today, ranked from the largest proportional decrease to the lowest. Three biogeographic regions have never been represented at the arboreta: Arctic and sub-Arctic, Ascension and St. Helena, and Southern Temperate Oceanic Islands

| Floristic region               | Frequency of taxa from each biogeographic region currently at South African arboreta | Frequency of taxa from each biogeographic region originally at South African arboreta |
|--------------------------------|--------------------------------------------------------------------------------------|---------------------------------------------------------------------------------------|
| North and East Australian      | 187                                                                                  | 298                                                                                   |
| Pacific N American             | 60                                                                                   | 104                                                                                   |
| Sino-Japanese                  | 231                                                                                  | 273                                                                                   |
| Atlantic N American (southern) | 58                                                                                   | 95                                                                                    |
| Caribbean                      | 162                                                                                  | 198                                                                                   |
| Atlantic N American (northern) | 49                                                                                   | 84                                                                                    |
| SW Australian                  | 19                                                                                   | 53                                                                                    |
| Euro-Siberian (Europe)         | 61                                                                                   | 88                                                                                    |
| Mediterranean                  | 77                                                                                   | 103                                                                                   |
| Indian                         | 116                                                                                  | 138                                                                                   |
| WC Asiatic                     | 49                                                                                   | 70                                                                                    |
| Continental SE Asiatic         | 131                                                                                  | 150                                                                                   |
| South Brazilian                | 94                                                                                   | 111                                                                                   |
| East African Steppe            | 464                                                                                  | 479                                                                                   |
| Malaysian                      | 85                                                                                   | 99                                                                                    |
| Venezuela & Guiana             | 67                                                                                   | 81                                                                                    |
| South African                  | 846                                                                                  | 859                                                                                   |
| Andean                         | 27                                                                                   | 38                                                                                    |
| Euro-Siberian (Asia)           | 10                                                                                   | 20                                                                                    |
| Amazon                         | 56                                                                                   | 65                                                                                    |
| West African Rainforest        | 210                                                                                  | 216                                                                                   |
| Pampas                         | 32                                                                                   | 38                                                                                    |
| Madagascar                     | 111                                                                                  | 116                                                                                   |
| C Australian                   | 6                                                                                    | 11                                                                                    |
| Sudanese Park Steppe           | 106                                                                                  | 110                                                                                   |
| NE African Highland            | 126                                                                                  | 130                                                                                   |
| Cape                           | 179                                                                                  | 183                                                                                   |
| Macaronesian                   | 14                                                                                   | 17                                                                                    |
| African Indian Desert          | 30                                                                                   | 33                                                                                    |
| New Zealand                    | 19                                                                                   | 22                                                                                    |
| Hawaiian                       | 5                                                                                    | 6                                                                                     |
| Melanesia & Micronesia         | 18                                                                                   | 19                                                                                    |



| Floristic region | Frequency of taxa from each biogeographic region currently at South African arboreta | Frequency of taxa from each biogeographic region originally at South African arboreta |
|------------------|--------------------------------------------------------------------------------------|---------------------------------------------------------------------------------------|
| Polynesia        | 8                                                                                    | 8                                                                                     |
| New Caledonia    | 10                                                                                   | 10                                                                                    |
| Juan Fernandez   | 1                                                                                    | 1                                                                                     |
| Patagonian       | 1                                                                                    | 1                                                                                     |

**Table S6:** The numbers of taxa from the arboreta falling into the eight IUCN Red List categories

|                       | Number of taxa indigenous to the RSA | Number of taxa alien to the RSA |
|-----------------------|--------------------------------------|---------------------------------|
| Not Assessed          | 600                                  | 625                             |
| Least Concern         | 316                                  | 428                             |
| Data Deficient        | 3                                    | 22                              |
| Near Threatened       | 21                                   | 40                              |
| Vulnerable            | 26                                   | 55                              |
| Endangered            | 4                                    | 24                              |
| Critically Endangered | 4                                    | 14                              |
| Extinct in the Wild   | 0                                    | 1                               |

**Table S7:** Number of taxa currently at the arboreta listed in the Southern African Plant Invader Atlas (SAPIA 2020), the Global Invasive Species Database (GISD 2020), Rejmánek & Richardson (2013), and Weber (2003)

|                                           | SAPIA (2020) | GISD (2020) | Rejmánek & Richardson (2013) | Weber (2003) |
|-------------------------------------------|--------------|-------------|------------------------------|--------------|
| Number of taxa recorded as invasive       | 205          | 86          | 316                          | 96           |
| Number of taxa indigenous to South Africa | NA           | 8           | 31                           | 8            |

**Table S8:** The current management strategies and ownership of the arboreta

| Current management strategy | Landowner    |          |           |                  |             |            |
|-----------------------------|--------------|----------|-----------|------------------|-------------|------------|
|                             | Conservation | Forestry | Municipal | Private property | State owned | University |
| ASI                         | 0            | 12       | 2         | 2                | 0           | 0          |
| Display                     | 2            | 3        | 28        | 11               | 1           | 1          |
| None                        | 3            | 8        | 4         | 1                | 1           | 2          |
| Research                    | 2            | 12       | 13        | 2                | 2           | 9          |
