# Supplementary material
Source: publisher figshare collection journal article supplement (https://tandf.figshare.com/articles/dataset/_/21193882)
Supplement: Supplementary file 1 [file 2]

## Sheet: Table S3 Database of arboreta
Table S3: Database of arboreta in South Africa as of March 2022
Arboretum	Total Families	Families Today	Total Genera	Genera Today	Total Taxa	Taxa Today	Established	Ended	Fate	Size Original	Size Now	Ownership	Cause	Original Purpose	Latitude	Longitude	P&R Recom-mendation	Appointment	Entrance Fee	Province	Forestry Arb	Transferred	CMS	Research	Education	Research & Education	Surviving	Poynton & Rycroft (1986)	Esterhuyse et al. (2001)	Gardener (1991)	Snowball sampling	Updated species list available	Recent partial species list available	Full species lists available older than 20 years	No species list available	National monument
Albert's Berg Arboretum	2	0	5	0	14	0	1927	2008	Transferred to Cape Nature in 1987; felled in 2008	3	NA	Conservation	Felled (conservation transfer)	Pinus trial; transferred to Cape Nature 1987; felled in 2008	-33.3621	22.08	NA	NA	NA	Western Cape	1	Conservation	NA	0	0	0	0	1	0	0	0	0	0	1	0	0
Alexandria Arboretum	5	0	7	0	31	0	1915	1990	Abandoned as an arboretum 1970	12	NA	Conservation	Felled (conservation transfer)	Test various species	-33.7002	26.367	NA	NA	NA	Eastern Cape	1	Conservation	NA	0	0	0	0	1	0	0	0	0	0	1	0	0
Amanzimnyama Garden	40	36	105	86	139	106	1896	NA	Private property; managed as private garden	8.5	8.5	Private property	NA	Display arboretum for aesthetics and recreation	-29.5712	31.1301	NA	1	0	KwaZulu-Natal	0	NA	Display	0	0	0	1	0	0	0	1	0	0	1	0	0
Arderne Gardens	NA	55	NA	106	NA	139	1845	NA	Managed as botanical garden by Friends of the Arderne Gardens	4.5	4	Municipal	NA	To study the adaptability and rate of growth of the various species	-33.9868	18.4657	NA	0	0	Western Cape	0	Municipal	Display	0	0	0	1	0	1	0	0	1	0	0	0	0
Austin Roberts Bird Sanctuary	NA	16	NA	22	NA	24	1958	NA	A protected area under management of City of Tshwane Municipality. Declared a national monument in 1980	11.1	11.1	Municipal	NA	A protected area for bird conservation	-25.7712	28.2284	NA	1	1	Gauteng	0	Municipal	Display	0	0	0	1	0	1	0	0	0	0	0	1	1
Barberton Arboretum	2	0	2	0	6	0	1907	1952	Abandoned 1952; transferred to Correctional services property and felled	51	NA	Municipal	Felled (municipal expansion)	Test various species	-25.7833	31.0167	NA	NA	NA	Mpumalanga	1	Municipal	NA	0	0	0	0	1	0	0	0	0	0	1	0	0
Beginsel Arboretum	15	1	23	2	46	3	1907	NA	Abandoned 1934; currently a 1.2ha block surrounded by ploughed land	1.3	1.2	Private property	NA	Test various species for this region	-26.8054	29.2304	NA	0	0	Mpumalanga	1	Private	None	0	0	0	1	1	0	0	0	0	0	1	0	0
Belfast Arboretum	12	2	18	2	88	2	1906	NA	After a fire in 1992 everything except the Cedrus deodora was felled. New research compt	4.7	0.2	Forestry	NA	Testing species from cooler-temperate parts of the world	-25.6622	30.0206	Retain, treat silviculturally and control invasive plants	1	0	Mpumalanga	1	Commercial forestry	ASI	0	0	0	1	1	0	0	0	0	0	1	0	0
Benvie Gardens	NA	30	NA	46	NA	58	1888	NA	Private property; managed as private garden	10	10	Private property	NA	Test various species	-29.2668	30.3604	NA	1	1	KwaZulu-Natal	0	Private	Research	1	0	0	1	0	1	0	0	0	0	0	1	0
Bergplaats Arboretum	2	0	5	0	8	0	1935	2013	Abandoned as arboretum 1985; Felled in 2013; transferred from Cape Pine to DAFF	4.9	NA	Forestry	burnt down	Various; from 1986 onwards Euc only	-33.8588	22.6363	Retain Eucalyptus block	NA	NA	Western Cape	1	Commercial forestry	NA	0	0	0	0	1	0	0	0	0	0	0	0	0
Berlin Arboretum	3	0	3	0	10	0	1928	1994	Transferred to Safcol management and felled 1994/1995	2.8	NA	Forestry	Felled (commercial replacement)	Test various species	-25.5501	30.7334	Abandon	NA	NA	Mpumalanga	1	Commercial forestry	NA	0	0	0	0	1	0	0	0	0	0	0	0	0
Blackwater Arboretum	15	2	22	4	47	5	1934	NA	ASI on HM forestry's books	1.9	0.9	Forestry	NA	Test various species	-30.6069	29.7187	Retain	1	0	KwaZulu-Natal	1	Commercial forestry	ASI	0	0	0	1	1	0	0	0	0	0	1	0	0
Bloemfontein Arboretum (Happy Valley conservancy)	16	5	31	7	41	8	1911	NA	Public park	1.9	5	Municipal	NA	Test various species	-29.1042	26.216	NA	0	0	Free State	1	Municipal	Display	0	0	0	1	1	0	0	0	0	0	1	0	0
Bloemfontein Third Raadsaal Arboretum	5	5	5	5	7	7	1879	NA	National Afrikaans literary museum and research centre; the trees were declared a national monument in 1972	0.7	0.7	Municipal	NA	Show arboretum	-29.1162	26.2167	NA	0	0	Free State	0	NA	Display	0	0	0	1	0	1	0	0	0	1	0	0	1
Bloukrans Arboretum	2	0	2	0	2	0	1972	2018	Compt. Jb1 of Lottering plantation (Cape Pine); felled in 2018	0.4	NA	Forestry	Felled (commercial replacement)	S. giganteum & Grevillea robusta trial	-33.9466	23.6265	NA	1	0	Western Cape	1	Commercial forestry	NA	0	0	0	0	1	0	0	0	1	0	0	0	0
Blue lilies bush Arboretum	3	0	3	0	5	0	1921	1995	Felled in 1995. Left to indigenous vegetation	2.7	NA	Forestry	Felled (not replaced)	Test Eucalyptus, Pinus & Cupressus spp.	-33.9963	23.9532	Retain	NA	NA	Western Cape	1	Commercial forestry	NA	0	0	0	0	1	0	0	0	0	0	1	0	0
Buffelsnek Arboretum	4	0	9	0	51	0	1921	1999	Felled prior to 2000; converted to commercial Pine compartment J12 under Cape Pine	6.9	NA	Forestry	Felled (commercial replacement)	Eucalyptus trial	-33.9076	23.1524	Retain	NA	NA	Western Cape	1	Commercial forestry	NA	0	0	0	0	1	0	0	0	0	0	1	0	0
Bultfontein Arboretum	2	0	3	0	4	0	1931	1994	Transferred to Safcol management and felled 1994/1995	NA	NA	Forestry	Felled (commercial replacement)	Test Cupressus torulosa, C. lusitanica, Taxodium distichum, Pinus echinata	-25.234	30.9501	Retain as source of Cupressus torulosa seed	NA	NA	Mpumalanga	1	Commercial forestry	NA	0	0	0	0	1	0	0	0	0	0	1	0	0
Burgers Park	NA	13	NA	15	NA	16	1889	NA	Public park, declared a national monument in 1979	4.5	4.5	Municipal	NA	Public park	-25.7541	28.1922	NA	0	0	Gauteng	0	NA	Display	0	0	0	1	0	1	0	0	0	0	0	1	1
Cedara Arboretum	10	7	11	7	22	9	1912	NA	ASI on HM compartment register	1.1	0.8	Forestry	NA	Test various species	-29.5167	30.2667	Develop into national monument	1	0	KwaZulu-Natal	1	Commercial forestry	ASI	0	0	0	1	1	0	0	0	0	0	1	0	0
Cheerio Gardens	NA	20	NA	31	NA	40	1946	NA	Private property; managed as private garden	18	18	Private property	NA	Display arboretum for aesthetics and recreation	-23.8903	29.9557	NA	1	1	Limpopo	0	NA	Display	0	0	0	1	0	1	0	0	0	0	0	1	0
City Square Park	12	12	17	17	18	18	1986	NA	Public park in Pietersburg	4.1	4.1	Municipal	NA	Public park	-23.9126	29.4513	NA	0	0	Limpopo	0	NA	Display	0	0	0	1	0	1	0	0	0	0	0	1	0
Commonwealth Arboretum	1	1	1	1	3	3	1915	NA	Responsibility of the Agribusiness unit of the Limpopo Economic Development Agency, under the Dept of Agric	11.6	11.6	Forestry	NA	Test Eucalyptus species	-23.8207	30.0669	NA	0	0	Limpopo	1	State forestry	None	0	0	0	1	1	0	0	0	1	0	0	0	0
Company Gardens	NA	45	NA	80	NA	104	1652	NA	Public park managed by the Cape Town Municipality	18.1	6.8	Municipal	NA	Production of fruit trees for provisioning the ships of the Dutch East India Company	-33.9282	18.4165	NA	0	0	Western Cape	0	NA	Research	1	0	0	1	0	1	0	0	0	1	0	0	1
Dargle Arboretum	1	0	5	0	5	0	1955	1986	Abandoned as arboretum in 1963; felled after 1986 survey	2	NA	Forestry	Felled (not replaced)	Test Poplar cultivars	-29.5325	30.0106	NA	NA	NA	KwaZulu-Natal	1	Commercial forestry	NA	0	0	0	0	1	0	0	0	0	0	1	0	0
De Hoek Arboretum	4	0	5	0	8	0	1927	1986	Felled and replaced by Pinus elliottii stand	1	NA	Forestry	Felled (commercial replacement)	Test indigenous spp.	-23.8167	30.015	Retain and keep in good order	NA	NA	Limpopo	1	Commercial forestry	NA	0	0	0	0	1	0	0	0	0	0	1	0	0
De Waal Park	NA	55	NA	95	NA	135	1890	NA	Public park in Cape Town; declared a national monument in 1968	6	6	Municipal	NA	Public park	-33.936	18.4121	NA	0	0	Western Cape	0	NA	Display	0	0	0	1	0	0	0	1	1	0	0	0	1
De Wet's Vlei Arboretum	1	0	1	0	2	0	1929	2008	Transferred to Cape Nature in 1987; felled in 2008	2.6	NA	Conservation	Felled (conservation transfer)	Pinus trial; transferred to NC 1987; felled in 2008	-33.3431	22.0286	NA	NA	NA	Western Cape	1	Conservation	NA	0	0	0	0	1	0	0	0	0	0	1	0	0
Diepwalle Arboretum	14	13	13	12	16	15	1926	NA	An active research trial managed by SanParks	2.6	1	Conservation	NA	Test indigenous and one exotic species	-33.9511	23.1597	Retain	1	0	Western Cape	1	Conservation	Research	1	0	0	1	1	0	0	0	1	0	0	0	0
DR de Wet Arboretum	31	9	24	12	31	12	1972	NA	Abandoned as research station in 1993; a section converted to Avocado & Macadamia farm	20	5.2	Forestry	NA	Test various species, angiosperms and conifers	-25.047	30.8787	Develop into national monument	1	0	Mpumalanga	1	Commercial forestry	Research	1	0	0	1	1	0	0	0	0	0	1	0	0
Draycott Arboretum	1	0	1	0	19	0	1990	2017	Burnt down in veld fire	0.015	NA	Forestry	Burnt down	Test Eucalyptus species	-29.0546	29.6218	NA	NA	NA	KwaZulu-Natal	1	NA	NA	0	0	0	0	0	0	0	1	1	0	0	0	0
Dukuduku Arboretum	7	0	12	0	22	0	1932	2006	Abandoned in 1971; felled in 2006 and replaced by E. grandis x camaldulensis	1.2	NA	Forestry	Felled (commercial replacement)	Test Eucalyptus species	-28.3621	32.2676	NA	NA	NA	KwaZulu-Natal	1	Commercial forestry	NA	0	0	0	0	1	0	0	0	0	0	1	0	0
Durban Botanic Gardens	96	94	375	361	576	534	1849	NA	Botanical garden	11	11	Municipal	NA	Testing various species for this region	-29.8467	31.0065	NA	1	0	KwaZulu-Natal	0	NA	Research	1	1	1	1	0	1	0	0	1	0	0	0	0
Eikenhof Arboretum	35	24	50	31	55	33	1954	NA	Show arboretum on private property	9	9	Private property	NA	Display arboretum for recreation	-34.1263	19.0575	NA	1	0	Western Cape	0	NA	Display	0	0	0	1	0	1	0	0	0	0	1	0	0
Eland's River Forest Arboretum	6	0	6	0	14	0	1937	1990	Abandoned in 1968; transferred to private property	7.6	NA	Conservation	Felled (conservation transfer)	Test various species for this region	-33.7027	25.2691	NA	NA	NA	Eastern Cape	1	Private	NA	0	0	0	0	1	0	0	0	0	0	1	0	0
Eland's River Groendal Arboretum	5	2	6	2	22	3	1924	NA	Abandoned in 1968; transferred to private property	7	1.5	Conservation	NA	Test various species for this region	-33.7027	25.2691	NA	0	0	Eastern Cape	1	Conservation	None	0	0	0	1	1	0	0	0	0	0	1	0	0
Eland's River Platberg Arboretum	2	1	3	1	6	1	1936	NA	Abandoned in 1969	0.7	0.7	Conservation	NA	Test various species for this region	-33.6699	25.3392	NA	1	0	Eastern Cape	1	Conservation	None	0	0	0	1	1	0	0	0	0	0	1	0	0
Entabeni Eucalyptus Arboretum	1	0	1	0	5	0	1928	1962	Felled	0.4	NA	Forestry	Felled (commercial replacement)	Testing four Eucalyptus spp.	-23.0006	30.2671	Retain	NA	NA	Limpopo	1	Commercial forestry	NA	0	0	0	0	1	0	0	0	0	0	1	0	0
Entabeni Indigenous Arboretum	18	1	35	1	38	1	1915	NA	Research arboretum on KLF register; passive research site	2	0.2	Forestry	NA	Test indigenous species for this region	-23.0512	30.2208	Retain in part	1	0	Limpopo	1	Commercial forestry	Research	1	0	0	1	1	0	0	0	0	0	1	0	0
Entabeni Lower Arboretum	18	10	28	13	42	15	1914	NA	Research arboretum on KLF register; passive research site	10	14.3	Forestry	NA	Test various species for this region	-23.0448	30.2356	Retain and develop as recreational area	1	0	Limpopo	1	Commercial forestry	Research	1	0	0	1	1	0	0	0	0	0	1	0	0
Entabeni Main Arboretum	1	1	1	1	2	2	1918	NA	Research arboretum on KLF register; much reduced due to military psych ward in 1980s	9.4	6	Forestry	NA	Test various species for this region	-22.9992	30.2618	Abandon	1	0	Limpopo	1	Commercial forestry	Research	1	0	0	1	1	0	0	0	0	0	1	0	0
Entabeni Redwood Arboretum	1	1	1	1	1	1	1900	NA	An ASI on KLF register	0.2	0.2	Forestry	NA	Sequoiadendron giganteum trial	-23.0115	30.2549	NA	1	0	Limpopo	1	Commercial forestry	ASI	0	0	0	1	1	0	0	0	1	0	0	0	0
Entabeni Sandstone Arboretum	2	0	2	0	7	0	1927	1962	Abandoned as research arboretum 1961; felled in 1962	0.5	NA	Forestry	Felled (commercial replacement)	Test various species for this region	-23.0012	30.2669	Abandon	NA	NA	Limpopo	1	Commercial forestry	NA	0	0	0	0	1	0	0	0	0	0	1	0	0
Ermelo Arboretum	8	1	14	1	56	1	1905	NA	Abandoned in 1939; transferred to Ermelo municipality; 13 Pinus arizonica left	7.8	0.1	Municipal	NA	Test various species for this region	-26.512	29.9558	NA	1	0	Mpumalanga	1	Municipal	None	0	0	0	1	1	0	0	0	0	0	1	0	0
Eteza Arboretum	1	0	2	0	19	0	1992	2017	Most species failed in drought	3.4	NA	Forestry	Felled (not replaced)	Eucalyptus trial	-28.5775	32.1296	NA	NA	NA	KwaZulu-Natal	1	NA	NA	0	0	0	0	0	0	0	1	1	0	0	0	0
Evelyn Valley Arboretum	4	4	11	6	24	11	1901	NA	Abandoned in 1986; currently an ASI under AFC	0.8	0.8	Forestry	NA	Testing exotic conifers	-32.7149	27.2463	Abandon as arboretum, retain as place of unique beauty	1	0	Eastern Cape	1	Commercial forestry	ASI	0	0	0	1	1	0	0	0	0	0	1	0	0
Flanagan Arboretum	20	18	26	24	32	29	1921	NA	Abandoned as an arboretum; derelict urban open space	1.68	1.68	Municipal	NA	Display arboretum for indigenous trees and shrubs	-25.7401	28.2073	NA	1	0	Gauteng	0	NA	None	0	0	0	1	0	0	0	1	1	0	0	0	0
Fort Cunynghame Arboretum	3	3	3	3	9	9	1895	NA	Abandoned 1953; currently listed as arboretum on AFC books; not a research site	11	10.5	Forestry	NA	Test various species for this region	-32.4871	27.3965	NA	1	0	Eastern Cape	1	Commercial forestry	ASI	0	0	0	1	1	0	0	0	0	0	1	0	0
Fort Grey Arboretum	6	0	8	0	49	0	1916	1980	Abandoned as arboretum in 1956. Transferred to municipality in 1977. Felled when transferred to DWAF	4.1	NA	Conservation	Felled (conservation transfer)	Test various species for this region	-33.0044	27.8211	NA	NA	NA	Eastern Cape	1	Conservation	NA	0	0	0	0	1	0	0	0	0	0	1	0	0
Free State NBG	NA	17	NA	23	NA	35	1967	NA	Botanical garden for the display of flora of the Free State; declared national monument in 1982	7	7	Municipal	NA	Botanical garden for the display of flora of the Free State	-29.0539	26.2129	NA	0	1	Free State	0	NA	Research	1	0	0	1	0	1	0	0	1	0	0	0	1
Goedehoop Arboretum	5	0	7	0	21	0	1915	1977	Abandoned as arboretum prior to 1930; felled 1977	0.8	NA	Forestry	Felled (commercial replacement)	Testing various species	-23.0167	30.2	NA	NA	NA	Limpopo	1	Commercial forestry	NA	0	0	0	0	1	0	0	0	0	0	1	0	0
Gouna Arboretum	3	0	3	0	6	0	1936	1980	Abandoned 1954; likely felled when land was transferred to Sanparks	12.1	NA	Conservation	Felled (conservation transfer)	Test various species for this region	-33.9668	23.05	None	NA	NA	Western Cape	1	Conservation	NA	0	0	0	0	1	0	0	0	0	0	1	0	0
Graskop Arboretum	4	0	5	0	24	0	1913	1994	Felled 1994/1995	61.7	NA	Forestry	Felled (not replaced)	Test various species for this region	-24.939	30.8336	Retain and develop as research & recreational area	NA	NA	Mpumalanga	1	Commercial forestry	NA	0	0	0	0	1	0	0	0	0	0	1	0	0
Groenkloof Arboretum	3	2	3	2	8	2	1908	NA	A picnic site in good condition part of Groenkloof NR	5.7	0.9	Conservation	NA	Test various species for this region	-25.7882	28.1988	Maintained by PTA municipality	0	0	Gauteng	1	Conservation	Display	0	0	0	1	1	0	0	0	0	0	1	0	0
Hanglip Arboretum	17	15	25	20	35	25	1916	NA	A research arboretum on KLF register; part of Hanglip plantation	1	2.1	Forestry	NA	Test various species for this region	-23.0098	29.9017	Retain	0	0	Limpopo	1	Research	Research	1	0	0	1	1	0	0	0	0	0	1	0	0
Harold Porter National Botanical Garden	NA	26	NA	41	NA	61	1959	NA	Botanical garden	10	10	Municipal	NA	Display of fynbos flora of the surrounding region	-34.3522	18.9263	NA	0	1	Western Cape	0	NA	Research	1	0	0	1	0	1	0	0	1	0	0	0	0
Harrismith Arboretum	3	0	5	0	13	0	1907	1986	Felled after 1986 survey	0.6	NA	Conservation	Felled (conservation transfer)	Test various species for this region	-28.2835	29.1836	NA	NA	NA	Free State	1	State forestry	NA	0	0	0	0	1	0	0	0	0	0	1	0	0
Highmoor Arboretum	1	0	1	0	4	0	1955	1978	Abandoned 1978; part of Highmoor NR since ~1980	NA	NA	Conservation	Felled (conservation transfer)	Pinus trials	-29.3167	29.6167	NA	NA	NA	KwaZulu-Natal	1	Conservation	NA	0	0	0	0	1	0	0	0	0	0	1	0	0
Hill 20 Arboretum	13	9	16	9	16	8	1930	NA	Research arboretum on KLF register; passive research site	4.9	4.2	Forestry	NA	Test various species for this region	-23.0325	30.2232	Retain	1	0	Limpopo	1	Commercial forestry	Research	1	0	0	1	1	0	0	0	0	0	1	0	0
Hill 20 Arboretum (extension)	2	2	2	2	2	2	1974	NA	Currently a commercial block on KLF land	0.3	0.3	Forestry	NA	Testing O. porosa and F. breyleyana	-23.0466	30.2299	NA	1	0	Limpopo	1	Commercial forestry	None	0	0	0	1	1	0	0	0	0	0	1	0	0
Hockley Arboretum	2	2	2	2	2	2	1986	NA	An ASI on Isingisi forestry products compt register	2.4	2.4	Forestry	NA	Test Quercus palustris & Sequoiadendron gigantea	-29.5319	30.0085	NA	1	0	KwaZulu-Natal	1	Commercial forestry	ASI	0	0	0	1	0	0	0	1	0	0	0	1	0
Hogsback Arboretum	21	19	31	28	42	36	1899	NA	Managed by Hogsback garden club as public arboretum	1.4	5	Forestry	NA	Test various species for this region	-29.7823	29.7661	Retain	0	0	Eastern Cape	0	Commercial forestry	Display	0	0	0	1	1	0	0	0	0	0	0	1	0
Hogsback Softwood Arboretum	2	2	6	6	12	12	1976	NA	Managed as experimental compt by AFC	4.7	4.7	Forestry	NA	Test conifer species	-32.5912	26.9475	NA	1	0	Eastern Cape	1	Commercial forestry	ASI	0	0	0	1	0	0	0	1	1	0	0	0	0
Imperani Arboretum	2	2	4	4	6	4	1921	NA	Transferred to Ficksburg municipality in late 1980s.	NA	0.3	Municipal	NA	Test three Pinus species	-28.8652	27.8435	NA	1	0	Free State	1	Municipal	None	0	0	0	1	1	0	0	0	0	0	1	0	0
Infruitec Heritage Garden	16	16	21	21	22	22	1974	NA	Display arboretum managed by the Agricultural Research Council's Infruitec-Nietvoorbij division	3	3	State owned	NA	Display arboretum commemorating the start of South Africa's fruit industry	-33.9268	18.8734	NA	1	0	Western Cape	0	NA	Display	0	0	0	1	0	1	0	0	1	0	0	0	0
Irene cemetery	7	5	11	6	29	6	1904	NA	Abandoned 1916 as an arboretum; declared a National Heritage site	0.8	0.8	Municipal	NA	Various species	-25.8709	28.2207	Original species largely removed	0	0	Gauteng	0	Municipal	ASI	0	0	0	1	1	0	0	0	0	0	0	1	1
Irene Dairy Farm	NA	20	NA	23	NA	29	1891	NA	Show arboretum on private property	3.86	3.86	Private property	NA	Private garden	-25.8791	28.2122	NA	1	1	Gauteng	0	NA	Display	0	0	0	1	0	1	0	0	0	0	0	1	0
Isibindi Estate	NA	21	NA	25	NA	30	1910	NA	Private property; managed as private garden	11	11	Private property	NA	Private garden	-26.1175	28.0529	NA	1	0	Gauteng	0	NA	ASI	0	0	0	1	0	0	0	1	1	0	0	0	0
Isidenge Arboretum	12	1	16	1	41	1	1946	NA	Abandoned in 1968; the one large Quercus tree on site is an ASI	1.5	0.1	Forestry	NA	Testing various species for this region	-28.3621	32.2676	NA	1	0	Eastern Cape	1	Commercial forestry	None	0	0	0	1	1	0	0	0	0	0	1	0	0
Jameson Park	NA	17	NA	30	NA	32	1922	NA	Public park	3.2	3.2	Municipal	NA	Public park	-29.8273	31.0097	NA	0	0	KwaZulu-Natal	0	NA	Display	0	0	0	1	0	1	0	0	0	0	0	1	0
Jan Cilliers Park	37	31	62	49	88	57	1962	NA	Public park	4.5	4.5	Municipal	NA	Public park	-25.7784	28.2245	NA	0	0	Gauteng	0	NA	Display	0	0	0	1	0	1	0	0	0	0	1	0	0
Japanese garden Durban-North	NA	23	NA	42	NA	48	1960	NA	Public park	7	7	Municipal	NA	Public park	-29.7955	31.0394	NA	0	0	KwaZulu-Natal	0	NA	Display	0	0	0	1	0	0	0	1	0	0	0	1	0
Japanese garden Pinetown	22	21	33	32	35	34	1980	NA	Public park	2	2	Municipal	NA	Public park	-29.8346	30.8704	NA	0	0	KwaZulu-Natal	0	NA	Display	0	0	0	1	0	0	0	1	0	0	0	1	0
JDM Keet (Westfalia)	51	43	101	86	125	110	1952	NA	Research arboretum	3.3	3.3	Private property	NA	Testing various species for this region	-23.731	30.0977	NA	1	0	Limpopo	1	NA	Research	1	0	0	1	1	0	0	0	0	0	1	0	0
Jessievale Arboretum	8	4	18	8	112	40	1907	NA	Classed as research arboretum compt A147 on KLF land	5.3	7.3	Forestry	NA	Testing Eucalyptus, Cupressus & Pinus from cold climates	-26.2307	30.5184	Retain	1	0	Mpumalanga	1	Commercial forestry	Research	1	0	0	1	1	0	0	0	0	0	1	0	0
Johannesburg Botanical Garden	63	61	140	129	233	213	1963	NA	Botanical garden	81	81	Municipal	NA	Botanical garden	-26.1571	27.8884	NA	0	0	Gauteng	0	NA	Research	1	0	0	1	0	1	0	0	1	0	0	0	0
Jonkershoek Indigenous	11	0	11	0	14	0	1936	1986	Felled 1953	0.8	NA	Forestry	Felled (commercial replacement)	Test indigenous species	-33.9648	18.9265	NA	NA	NA	Western Cape	1	Commercial forestry	NA	0	0	0	0	1	0	0	0	0	0	0	1	0
Jonkershoek Manor	11	10	14	10	19	11	1949	NA	Much reduced in size; remainder is Cape Pine office garden	2	1	Forestry	NA	Testing various species for this region	-33.9648	18.9265	NA	1	0	Western Cape	1	Commercial forestry	Display	0	0	0	1	1	0	0	0	0	0	0	1	0
Jonkershoek Poplar	1	0	1	0	9	0	1944	1953	Felled 1953	1	NA	Forestry	Felled (commercial replacement)	Test Populus hybrids	-33.9648	18.9265	NA	NA	NA	Western Cape	1	Commercial forestry	NA	0	0	0	0	1	0	0	0	0	0	1	0	0
Joubert Park	NA	8	NA	12	NA	13	1892	NA	Public park managed by the Johannesburg Municipality	5.8	5.8	Municipal	NA	Public park	-26.1961	28.0468	NA	0	0	Gauteng	0	NA	Display	0	0	0	1	0	1	0	0	0	0	0	1	0
Karoo Desert National Botanical Garden	NA	13	NA	15	NA	19	1945	NA	Botanical garden managed by SANBI focussing on the succulent flora of the Karoo	11	11	State owned	NA	Conservation of the Karoo succulent flora	-33.6122	19.4498	NA	0	1	Northern Cape	0	NA	Research	1	0	0	1	0	1	0	0	1	0	0	0	0
Katberg Arboretum	9	0	10	0	29	0	1919	1968	Abandoned 1968	0.8	NA	Forestry	Felled (not replaced)	C. deodora and Pinus spp. Trial	-32.4834	27.6835	NA	NA	NA	Eastern Cape	1	State forestry	NA	0	0	0	0	1	0	0	0	0	0	1	0	0
Kenmo Lake Arboretum	NA	19	NA	31	NA	40	1958	NA	Show arboretum on private property	14.4	14.4	Private property	NA	Private garden	-29.6946	29.5176	NA	0	0	KwaZulu-Natal	0	NA	Display	0	0	0	1	0	0	1	0	0	0	0	1	0
Keurboomsrivier Arboretum	2	0	2	0	4	0	1935	1998	Burnt down in 1998 and was replaced by Pinus elliottii stand	6.5	NA	Forestry	Furnt down	Testing various species for this region	-33.9247	23.3944	Retain only 2 P. serotina plots	NA	NA	Western Cape	1	Commercial forestry	NA	0	0	0	0	1	0	0	0	0	0	1	0	0
Kirstenbosch National Botanical Garden	92	92	278	277	560	559	1913	NA	Botanical garden managed by SANBI	36	36	Municipal	NA	Botanical garden	-33.9913	18.4337	NA	0	1	Western Cape	0	NA	Research	1	0	0	1	0	1	0	0	1	0	0	0	0
Kluitjieskraal Arboretum	4	2	4	2	10	2	1899	NA	Transferred to DAFF	NA	0.2	Forestry	NA	Test Eucalyptus and Pinus spp.	-33.4255	19.1796	NA	1	0	Western Cape	1	State forestry	None	0	0	0	1	1	0	0	0	0	0	1	0	0
Kwambonambi Arboretum	6	3	8	3	34	6	1932	NA	Active research arboretum of KLF. Expanded in 1975 by 9.8ha and 5 spp	13.2	19.7	Forestry	NA	Eucalyptus, Pinus and Araucaria trials	-28.6621	32.1585	Retain	1	0	KwaZulu-Natal	1	Research	Research	1	0	0	1	1	0	0	0	0	0	1	0	0
KwaZulu-Natal National Botanical Garden							1874	NA	Managed by SANBI as botanical garden; declared national monument in 1983	24	24	Municipal	NA	Testing various species for this region	-29.6069	30.3473	NA	0	1	KwaZulu-Natal	0	NA	Research	1	0	0	1	0	1	0	0	0	1	0	0	1
Lebanon Arboretum A	7	1	11	1	41	2	1912	NA	Three trees still standing; compartment L10c	0.1	0.1	Forestry	NA	Testing various spp	-34.1838	19.1147	NA	1	0	Western Cape	1	Commercial forestry	None	0	0	0	1	1	0	0	0	0	0	1	0	0
Lebanon Arboretum B	1	1	1	1	1	1	1930	NA	ASI on Cape Pine books; compartment G15a	0.79	0.79	Forestry	NA	Testing S. sempervirens	-34.0688	19.0481	None	0	0	Western Cape	1	Commercial forestry	ASI	0	0	0	1	0	0	0	1	1	0	0	0	0
Leeuwenhof Estate	NA	25	NA	40	NA	48	1850	NA	Residence of the Premier of the Western Cape	2	2	Municipal	NA	Garden of the Governor of the Cape's residence	-33.9371	18.4065	NA	1	1	Western Cape	0	NA	Display	0	0	0	1	0	1	0	0	0	0	0	1	1
Lichtenburg Arboretum	11	0	16	0	64	0	1905	1989	Transferred to municipality, then felled (~1989)	3	NA	Municipal	Felled (municipal expansion)	Test various species for forestry or amenity purposes	-26.1801	26.1669	None	NA	NA	North West	1	Municipal	NA	0	0	0	0	1	0	0	0	0	0	1	0	0
Loerie Arboretum	4	0	5	0	22	0	1922	2005	Burnt down in 2005 and replanted with experimental P. elliottii trial	2.1	NA	Forestry	burnt down	Test various species for forestry or amenity purposes	-33.8127	25.0826	Retain	NA	NA	Western Cape	1	Commercial forestry	NA	0	0	0	0	1	0	0	0	0	0	1	0	0
Lost City Botanical Garden	NA	18	NA	36	NA	42	1992	NA	Garden surrounding the Sun City Resort	4	4	Private property	NA	Botanical garden for display	-25.3401	27.0951	NA	0	1	North West	0	NA	Display	0	0	0	1	0	1	0	0	0	0	0	1	0
Lottering Arboretum	22	0	30	0	104	0	1936	1995	Currently 18 year old Pinus elliottii stand (compt. S32)	20	NA	Forestry	Felled (commercial replacement)	Testing indigenous and exotic species	-33.9782	23.8088	Retain Euc plots in NE corner and open as public picnic area.	NA	NA	Western Cape	1	Commercial forestry	NA	0	0	0	0	1	0	0	0	0	0	1	0	0
Louis Botha Park	NA	9	NA	11	NA	11	1990	NA	Abandoned as a park but still Greater Letaba municipal land	0.5	0.5	Municipal	NA	Public park	-23.6946	30.1311	NA	0	0	Limpopo	0	NA	None	0	0	0	1	0	1	0	0	0	0	0	1	0
Lowveld National Botanical Garden	NA	52	NA	120	NA	165	1969	NA	Botanical garden	25	25	Municipal	NA	Botanical garden	-25.4439	30.9662	NA	0	1	Mpumalanga	0	NA	Research	1	0	0	1	0	1	0	0	1	0	0	0	0
Ludwigs Burg	32	0	56	0	103	0	1830	1860	Plants and property auctioned off separately in 1860; property subdivided into separate lots.	1.2	NA	Private property	Felled (municipal expansion)	Introduction of exotic species	-33.9305	18.4098	NA	NA	NA	Western Cape	0	NA	NA	0	0	0	0	0	1	0	0	0	0	1	0	0
Magennis Park	NA	18	NA	26	NA	31	1882	NA	Public park	4	4	Municipal	NA	Public park	-33.7633	25.402	NA	1	0	Eastern Cape	0	NA	Display	0	0	0	1	0	1	0	0	0	0	0	1	0
Makaranga Garden	0	23	0	38	0	45	1980	NA	Botanical garden	12	12	Private property	NA	Personal garden	-29.7914	30.8173	NA	0	1	KwaZulu-Natal	0	NA	Display	0	0	0	1	0	0	1	0	0	0	0	1	0
Makhanda Botanic Garden	NA	18	NA	27	NA	32	1853	NA	Botanical garden, declared a national monument in 1984	17	17	Municipal	NA	Teaching site	-33.3153	26.5215	NA	0	0	Eastern Cape	0	NA	Research	1	1	1	1	0	1	0	0	0	0	0	1	1
Manie v.d. Schijff botanic garden	NA	116	NA	417	NA	777	1924	NA	Botanical garden	3.5	3.5	University	NA	Botanic garden	-25.752	28.229	NA	1	0	Gauteng	0	NA	Research	1	1	1	1	0	0	0	1	1	0	0	0	0
Manzangwenya Arboretum	3	3	3	3	6	5	1960	NA	All poles removed & returned to management 1979; currently DAFF land in the process of being transferred to the Zulu community	4	4	Forestry	NA	Eucalyptus and Pinus trial	-27.2199	32.7105	NA	1	0	KwaZulu-Natal	1	Commercial forestry	None	0	0	0	1	1	0	0	0	0	0	1	0	0
Melrose House Garden	NA	7	NA	7	NA	7	1886	NA	Garden surrounding Melrose House, Pretoria. Declared a national monument in 1979	0.6	0.6	Municipal	NA	Private garden	-25.7559	28.1926	NA	1	1	Gauteng	0	NA	Display	0	0	0	1	0	1	0	0	0	0	0	1	1
Miclyn Manor Arboretum	40	37	70	58	83	65	1932	NA	Show arboretum on private property	0.42	0.42	Private property	NA	Private garden	-29.7906	30.848	NA	1	0	KwaZulu-Natal	0	NA	Display	0	0	0	1	0	1	0	0	1	0	0	0	0
Middelkop Lower Arboretum	21	0	28	0	35	0	1914	1965	Abandoned 1965; felled shortly thereafter to make way for tea estate	1.2	NA	State owned	Felled (agric land)	Testing exotic & indigenous species	-23.8166	30.0835	NA	NA	NA	Limpopo	1	Private	NA	0	0	0	0	1	0	0	0	0	0	1	0	0
Middelkop Upper Arboretum	13	0	13	0	23	0	1918	1965	Abandoned 1965; felled shortly thereafter to make way for tea estate	1	NA	State owned	Felled (agric land)	Testing exotic & indigenous species	-23.8166	30.0835	NA	NA	NA	Limpopo	1	Private	NA	0	0	0	0	1	0	0	0	0	0	1	0	0
Mitchells Park	38	35	74	68	82	75	1902	NA	Public park and zoological garden	4.5	4.5	Municipal	NA	Public park and zoological garden	-29.8251	31.0113	NA	0	0	KwaZulu-Natal	0	NA	Display	0	0	0	1	0	1	0	0	0	0	0	1	0
Msunduzi museum arboretum	6	2	7	3	7	3	1912	NA	Historic trees standing in courtyard of Voortrekker complex	0.12	0.03	Municipal	NA	Commemorating the opening of the Msunduzi museum	-29.5992	30.3824	NA	0	1	KwaZulu-Natal	0	NA	Display	0	0	0	1	0	1	0	0	1	0	0	0	1
National Zoological Garden	53	46	110	86	174	120	1899	NA	National Zoological garden of South Africa	85	85	Municipal	NA	Zoological garden	-25.7388	28.1894	NA	0	1	Gauteng	0	NA	Research	1	0	0	1	0	1	0	0	1	0	0	0	0
Ngome Arboretum	3	1	6	3	14	2	1971	NA	Abandoned as research arboretum 1980; research arboretum on KLF register	NA	2	Forestry	NA	Test various species	-27.8164	31.4193	NA	1	0	KwaZulu-Natal	1	Commercial forestry	Research	1	0	0	1	1	0	0	0	0	0	1	0	0
North-West University botanic garden	NA	40	NA	64	NA	105	1962	NA	North-West University botanic garden	3	3	University	NA	Botanical garden for education	-26.6824	27.0953	NA	1	0	North West	0	NA	Research	1	1	1	1	0	0	0	1	1	0	0	0	0
North-West University Mafikeng campus	NA	10	NA	15	NA	20	1980	NA	North-West University Mafikeng campus	51.5	51.5	University	NA	Aesthetic and recreational	-25.8273	25.6082	NA	1	0	North West	0	NA	Research	1	1	1	1	0	0	0	1	1	0	0	0	0
North-West University Potchefstroom campus	NA	30	NA	42	NA	57	1950	NA	North-West University Potchefstroom campus	67.4	67.4	University	NA	Aesthetic and recreational	-26.6869	27.0948	NA	1	0	North West	0	NA	Research	1	1	1	1	0	0	0	1	1	0	0	0	0
Nqadu Arboretum A	3	1	5	2	14	2	1914	NA	Abandoned after 1962	1.2	1.2	Forestry	NA	Testing conifers	-31.432	28.7511	NA	1	0	Eastern Cape	1	Commercial forestry	None	0	0	0	1	1	0	0	0	1	0	0	0	0
Nqadu Arboretum B	1	1	1	1	1	1	1934	NA	A show compartment on Amathole forestry books	0.1	0.1	Forestry	NA	Thuja occidentalis test site	-31.4069	28.7473	NA	1	0	Eastern Cape	1	Commercial forestry	ASI	0	0	0	1	0	0	0	1	0	0	1	0	0
Ntsubane Arboretum	11	3	19	3	56	4	1914	NA	Abandoned after 1972; felled piecemeal starting in 1974	35	0.2	Forestry	NA	Testing various species for this region	-31.4071	29.6985	NA	1	0	Eastern Cape	1	State forestry	None	0	0	0	1	1	0	0	0	0	0	1	0	0
Ntywenka Arboretum	4	0	6	0	11	0	1930	2009	Abandoned 1970; felled in 2009, those not moribund were sold to sawmill	0.9	NA	Forestry	Felled (not replaced)	Testing various species for this region	-31.1733	28.6194	NA	NA	NA	Eastern Cape	1	State forestry	NA	0	0	0	0	1	0	0	0	0	0	1	0	0
Nursery Ravine Arboretum	5	5	6	6	6	6	1895	NA	Abandoned in 1986; transferred to Cape Nature	0.7	1.5	Conservation	NA	Cryptomeria japonica trial	-33.981	18.4116	Retain; abandon apart from two plots	0	0	Western Cape	1	Conservation	None	0	0	0	1	1	0	0	0	0	0	1	0	0
Old Nectar Gardens	0	35	0	58	0	81	1941	NA	Botanical garden on private land	0.8	0.8	Private property	NA	Private garden	-33.957	18.9163	NA	1	1	Western Cape	0	Private	Display	0	0	0	1	0	0	1	0	1	0	0	0	0
Oppenheimer Memorial Gardens	NA	24	NA	38	NA	38	1962	NA	Transferred to Sol Plaatje University for infrastructural development	4.6	4.6	Municipal	NA	Aesthetic and recreational use of the public	-28.7437	24.7679	NA	1	0	Northern Cape	0	0	Display	0	0	0	1	0	1	0	0	1	0	0	0	0
Paarl Arboretum	67	67	194	191	383	374	1957	NA	Managed as public arboretum by Drakenstein municipality	31	31	Municipal	NA	Public park	-33.7592	18.9791	NA	0	0	Western Cape	0	Municipal	Research	0	1	0	1	0	1	0	0	1	0	0	0	0
Palm Park	NA	6	NA	11	NA	11	1980	NA	Public park	2.3	2.3	Municipal	NA	Public park	-23.051	29.9151	NA	0	0	Limpopo	0	NA	Display	0	0	0	1	0	1	0	0	0	0	0	1	0
Pan Arboretum	6	2	9	2	75	4	1906	NA	A KLF research compartment; after many fires it is in a derelict state	6.8	12	Forestry	NA	Testing Cupressus, Pinus & Eucalyptus species for this region	-25.7397	29.6902	Retain, and expand to test species for harsh climates	1	0	Mpumalanga	1	Commercial forestry	Research	1	0	0	1	1	0	0	0	0	0	1	0	0
Port_Durnford Arboretum A	1	1	1	1	1	1	1923	NA	An ASI on Siqubeka forestry books, natural regen cleared periodically	0.6	0.6	Forestry	NA	Agathis robusta test plot	-28.9187	31.8069	Retain	1	0	KwaZulu-Natal	1	Commercial forestry	ASI	0	0	0	1	1	0	0	0	0	0	1	0	1
Port_Durnford Arboretum B	1	0	2	0	2	0	1923	2018	An ASI on Siqubeka forestry books, felled in 2018	6.4	NA	Forestry	Felled (commercial replacement)	Eucalyptus microcorys & E. citriodora	-28.9151	31.802	NA	NA	NA	KwaZulu-Natal	1	Commercial forestry	NA	0	0	0	0	1	0	0	0	0	0	1	0	0
Port_Durnford Arboretum C	16	7	27	8	45	8	1927	NA	An ASI on Siqubeka forestry books	5.7	4	Forestry	NA	Testing various species for this region	-28.8975	31.8217	NA	1	0	KwaZulu-Natal	1	Commercial forestry	ASI	0	0	0	1	1	0	0	0	0	0	1	0	0
Potchefstroom Arboretum A	14	0	22	0	64	0	1905	1970	Abandoned as arboretum ~1970. Transferred to municipality shortly thereafter and felled	1.6	NA	Municipal	Felled (municipal expansion)	Testing various species for this region	-26.7166	27.1001	NA	NA	NA	North West	1	Municipal	NA	0	0	0	0	1	0	0	0	0	0	1	0	0
Potchefstroom Arboretum B	1	0	1	0	1	0	1988	1994	Abandoned as arboretum in ~1994. Area cleared shortly thereafter	15	NA	Municipal	felled (not replaced)	Recreational & educational area	-26.6695	27.0715	NA	NA	NA	North West	0	Municipal	NA	0	0	0	0	0	0	0	1	0	0	0	1	0
Pretoria National Botanical Garden	54	53	110	107	145	141	1958	NA	Botanical garden on municipal land; declared a national monument in 1979	60	75	Municipal	NA	Botanical garden for education and research	-25.7385	28.2749	NA	0	1	Gauteng	0	NA	Research	1	0	0	1	0	1	0	0	0	1	0	0	1
Prince Alfred Park	NA	0	NA	0	NA	0	1865	2006	Converted to sports stadium in 2006	15.8	0	Municipal	Felled (municipal expansion)	Public park	-33.9391	25.6007	NA	NA	NA	Eastern Cape	0	NA	NA	0	0	0	0	0	1	0	0	0	0	0	1	0
Queens Park	NA	13	NA	20	NA	22	1874	NA	Public park	5.8	5.8	Municipal	NA	Aesthetic and recreational use of the public	-28.7437	24.775	NA	0	0	Northern Cape	0	NA	Display	0	0	0	1	0	1	0	0	1	0	0	0	0
Queens Park Zoo	NA	30	NA	40	NA	43	1890	NA	Zoological garden managed by the East London municipality and national monument	9.2	9.2	Municipal	NA	Public park in East London	-33.0175	27.8978	NA	0	1	Eastern Cape	0	NA	Display	0	0	0	1	0	1	0	0	0	0	0	1	1
Reinet House Garden	2	2	2	2	2	2	1870	NA	Reinet House Museum	0.1	0.1	Municipal	NA	Garden of Nederduitse-Gereformeerde Church rectory	-32.2511	24.5391	NA	0	0	Northern Cape	0	NA	ASI	0	0	0	1	0	1	0	0	1	0	0	0	1
Robertson Arboretum	17	0	35	0	83	0	1897	1993	Abandoned since the land was transferred in the 1970s to the Robertson municipality. Area clearfelled ~10 years ago with a housing estate development.	1.2	NA	Municipal	Felled (municipal expansion)	Eucalyptus species	-33.8121	19.8551	NA	NA	NA	Western Cape	1	Municipal	NA	0	0	0	0	1	0	0	0	0	0	1	0	0
Rosehaugh Arboretum	2	0	2	0	4	0	1937	1993	Abandoned 1951 after fire damage in that year. Felled 1993/1994	2.2	NA	Forestry	Felled (commercial replacement)	To test Cupressus lusitanica & Pinus spp.	-25.2958	30.8307	NA	NA	NA	Mpumalanga	1	Commercial forestry	NA	0	0	0	0	1	0	0	0	0	0	1	0	0
Saasveld Groenkop Arboretum	4	3	8	7	24	16	1929	NA	Abandoned as arboretum in 1986.	8.4	1	University	NA	Myrtaceae & conifer test site	-33.9616	22.5361	Develop into national monument	1	0	Western Cape	1	Private	None	0	0	0	1	1	0	0	0	0	0	1	0	0
Saasveld Jubilee Arboretum	20	10	29	13	42	21	1982	NA	Arboretum on Saasveld college; no real management; not really used for teaching	1.6	1	University	NA	Established to commemorate Saasveld college turing 50	-33.9566	22.5297	Develop into national monument	1	0	Western Cape	1	Private	None	0	0	0	1	1	0	0	0	0	0	1	0	0
Saint Lucia Arboretum	6	0	7	0	28	0	1935	2007	Expanded in 1960 to 5 ha. Many plots abandoned after wind damage in 1979	2.5	NA	Forestry	Felled (commercial replacement)	To study the adaptability and rate of growth of the various species	-28.35	32.3834	Retain	NA	NA	KwaZulu-Natal	1	Conservation	NA	0	0	0	0	1	0	0	0	0	0	1	0	0
Salique Arboretum	7	0	12	0	32	0	1931	1971	Abandoned 1971	NA	NA	Forestry	Felled (commercial replacement)	Testing various species for this region	-24.6002	30.9	NA	NA	NA	Mpumalanga	1	State forestry	NA	0	0	0	0	1	0	0	0	0	0	1	0	0
Senekal Dutch Reformed Church Garden	NA	15	NA	19	NA	20	1985	NA	Church garden with a Biblical theme	0.7	0.7	Private property	NA	Church garden with a Biblical theme	-28.3222	27.6225	NA	1	0	Free State	0	NA	Display	0	0	0	1	0	1	0	0	0	0	0	1	0
Sequoia Garden Retreat	NA	13	NA	20	NA	28	1914	NA	Botanical garden	6.5	6.5	Private property	NA	Private arboretum	-23.9003	29.9486	NA	1	1	Limpopo	0	NA	Display	0	0	0	1	0	0	0	1	0	0	0	1	0
Skukuza Arboretum	15	13	19	15	19	15	1972	NA	Abandoned arboretum, managed as an office garden	0.3	0.3	State owned	NA	Display arboretum of species in the Punda Maria area	-24.9951	31.5879	NA	1	0	Mpumalanga	0	NA	None	0	0	0	1	0	0	0	1	0	0	1	0	0
Skyline Nature Reserve	61	34	183	59	253	64	1968	NA	Nature reserve managed by EKZN Wildlife	3	0.5	Conservation	NA	Display arboretum of various taxa	-30.8187	30.3892	NA	0	0	KwaZulu-Natal	0	Conservation	Display	0	0	0	1	0	1	0	0	0	0	1	0	0
Spring Grove Arboretum	NA	20	NA	28	NA	33	1906	NA	Clifton Preparatory School grounds	56	56	Private property	NA	Private arboretum	-29.3572	29.9802	NA	1	0	KwaZulu-Natal	0	NA	ASI	0	0	0	1	0	1	0	0	0	0	0	1	0
Springbok Park	NA	13	NA	17	NA	19	1905	NA	Public park in Pretoria; declared national monument in 1979	2.5	2.5	Municipal	NA	Public park	-25.7455	28.2369	NA	0	0	Gauteng	0	NA	Display	0	0	0	1	0	1	0	0	0	0	0	1	1
St. George's Park	NA	24	NA	36	NA	46	1861	NA	Public park in Port Elizabeth	7.1	7.1	Municipal	NA	Public park	-33.9639	25.6076	NA	0	0	Eastern Cape	0	NA	Display	0	0	0	1	0	1	0	0	0	0	0	1	0
Stellenbosch University Botanical Garden	NA	114	NA	362	NA	629	1922	NA	Botanical garden	2	2	University	NA	Teaching site	-33.9367	18.8655	NA	0	1	Western Cape	0	NA	Research	1	1	1	1	0	1	0	0	1	0	0	0	0
Storms River Arboretum	3	0	3	0	6	0	1922	1998	Felled piecemeal (due to poor market at the time) 15 years ago	2.5	NA	Forestry	Felled (commercial replacement)	Testing Eucalyptus species	-33.9822	23.8572	NA	NA	NA	Western Cape	1	Commercial forestry	NA	0	0	0	0	1	0	0	0	0	0	1	0	0
Tainton Arboretum	55	55	128	128	181	181	1995	NA	Managed as demonstration and research arboretum	0.6	0.6	University	NA	Teaching site	-29.3775	30.2412	NA	1	0	KwaZulu-Natal	0	NA	Research	1	1	1	1	0	0	0	1	1	0	0	0	0
The Wilds	28	27	45	42	52	49	1924	NA	Conservancy declared a national monument in 1981	18.7	16	Municipal	NA	Aesthetic and recreational use of the public	-26.1738	28.0517	NA	0	0	Gauteng	0	NA	Display	0	0	0	1	0	1	0	0	1	0	0	0	1
Thohoyandou National Botanical Garden	NA	33	NA	68	NA	85	1986	NA	Botanical garden managed by SANBI	86	86	State owned	NA	Botanical garden	-22.9663	30.4645	NA	0	1	Limpopo	0	NA	Research	1	0	0	1	0	0	0	1	1	0	0	0	0
Timbadola Arboretum	6	0	6	0	6	0	1935	1986	Felled after 1986 survey	1	NA	Forestry	Felled (commercial replacement)	Testing various species	-23.0167	30.2	Retain	0	0	Limpopo	1	Commercial forestry	NA	0	0	0	0	1	0	0	0	0	0	1	0	0
Tokai Arboretum	49	28	119	47	330	82	1886	NA	Declared a monument in 1985; maintained by Sanparks	23.6	15	Conservation	NA	Testing various species for this region	-34.0611	18.4149	Develop into national monument	0	0	Western Cape	1	Conservation	Research	0	1	0	1	1	0	0	0	0	0	1	0	1
Toll house Arboretum	2	0	3	0	6	0	1923	2008	Transferred to Cape Nature in 1987; felled in 2008	1	NA	Conservation	Felled (conservation transfer)	Pinus trial; transferred to NC 1987; felled in 2008	-33.3492	22.0467	NA	NA	NA	Western Cape	1	Conservation	NA	0	0	0	0	1	0	0	0	0	0	1	0	0
Tree Park	NA	17	NA	19	NA	20	1980	NA	Public park	24.2	24.2	Municipal	NA	Public park	-23.0424	29.9166	NA	0	0	Limpopo	0	NA	Display	0	0	0	1	0	1	0	0	0	0	0	1	0
Tweefontein Arboretum	5	0	8	0	26	0	1932	1994	Transferred to Safcol management and felled 1994/1995	3.6	NA	Forestry	Felled (commercial replacement)	Pinus trial with 3 Eucalyptus spp, C. deodora & S. sempervirens	-25.0502	30.7833	Retain	NA	NA	Mpumalanga	1	Commercial forestry	NA	0	0	0	0	1	0	0	0	0	0	1	0	0
Twinstreams Arboretum	38	23	62	34	67	34	1952	NA	Transferred to MONDI and managed by WESSA; forms part of a Natural Heritage site	1.2	1.2	Forestry	NA	Display arboretum of taxa indigenous to KZN for education	-28.9811	31.7374	NA	0	0	KwaZulu-Natal	0	NA	Display	0	1	0	1	0	1	0	0	0	0	1	0	1
Tzaneen Forestry Station	8	7	13	8	13	8	1970	NA	Research plot on KLF compartment register	2.3	3	Forestry	NA	Testing various species for this region	-23.7787	30.1312	Retain	1	0	Limpopo	1	Research	Research	1	0	0	1	0	0	0	1	1	0	0	0	0
University of Johannesburg Auckland campus	NA	60	NA	125	NA	174	1967	NA	University of Johannesburg Auckland campus trees used for education of botany students	47.8	47.8	University	NA	Aesthetic, educational and for research purposes	-26.1892	28.0115	NA	1	0	Gauteng	0	NA	Research	1	1	1	1	0	0	0	1	1	0	0	0	0
University of Pretoria Hatfield campus	NA	40	NA	82	NA	96	1908	NA	University of Pretoria Hatfield campus	56	56	University	NA	Aesthetic, educational and for research purposes	-25.757	28.2339	NA	1	0	Gauteng	0	NA	Research	1	1	1	1	0	0	0	1	0	0	0	1	0
University of Pretoria Hillcrest campus	28	27	47	46	61	60	1908	NA	University of Pretoria sports campus and New Africa Institute	76	76	University	NA	Aesthetic, educational and for research purposes	-25.7451	28.2475	NA	1	0	Gauteng	0	NA	Research	1	1	1	1	0	0	0	1	0	0	0	1	0
University of Pretoria Onderstepoort campus	NA	39	NA	63	NA	79	1920	NA	Aesthetic and recreational	62	62	University	NA	Aesthetic and recreational	-25.6552	28.1782	NA	1	0	Gauteng	0	NA	Display	0	0	0	1	0	0	0	1	1	0	0	0	0
Victoria Park	NA	20	NA	33	NA	41	1891	NA	Public park in Port Elizabeth	7.26	7.26	Municipal	NA	Public park	-33.976	25.6162	NA	0	0	Eastern Cape	0	NA	Display	0	0	0	1	0	1	0	0	0	0	0	1	0
Vink van Zyl Arboretum	NA	35	NA	63	NA	85	2000	NA	Public park in Cape Town	2.7	2.7	Municipal	NA	Public park	-33.8599	18.6261	NA	0	0	Western Cape	0	NA	Display	0	0	0	1	0	0	0	1	1	0	0	0	0
Walter Sisulu National Botanical Garden	NA	63	NA	148	NA	266	1982	NA	Botanical garden managed by SANBI	25	25	Municipal	NA	Botanical garden	-26.0872	27.8446	NA	0	1	Gauteng	0	NA	Research	1	0	0	1	0	1	0	0	1	0	0	0	0
Witelsbos Arboretum	1	0	1	0	3	0	1930	2006	Abandoned 1989. Felled in 2006 and replaced by a Pinus elliottii stand	9.4	NA	Forestry	Felled (commercial replacement)	Trial planting (Eucalyptus spp.)	-33.9942	24.1012	NA	NA	NA	Western Cape	1	Commercial forestry	NA	0	0	0	0	1	0	0	0	0	0	1	0	0
Witfontein Arboretum	5	0	8	0	25	0	1924	1994	Transferred to Safcol management and felled 1994/1995	2	NA	Forestry	Felled (commercial replacement)	Testing various species for this region	-33.9168	22.4333	Abandon	NA	NA	Western Cape	1	Conservation	NA	0	0	0	0	1	0	0	0	0	0	1	0	0
Woodbush Arboretum	9	3	14	6	41	11	1907	NA	Research plot on KLF compartment register	1.8	1.5	Forestry	NA	Testing various species for this region	-23.842	29.9877	Retain	1	0	Limpopo	1	Commercial forestry	Research	1	0	0	1	1	0	0	0	0	0	1	0	0
Wynberg Park	NA	45	NA	82	NA	103	1902	NA	Public park in Cape Town	15.4	15.4	Municipal	NA	Public park	-34.0008	18.4525	NA	0	0	Western Cape	0	NA	Display	0	0	0	1	0	0	0	1	1	0	0	0	0
Xotcheyake Arboretum	1	0	2	0	12	0	1914	1986	Felled ~1986; currently a Pinus patula compartment under SAPPI	1.6	NA	Forestry	Felled (commercial replacement)	Pinus trial	-29.7823	29.7661	NA	NA	NA	KwaZulu-Natal	1	Commercial forestry	NA	0	0	0	0	1	0	0	0	0	0	1	0	0
Zuurberg Arboretum	4	0	5	0	21	0	1921	1990	Abandoned 1968; felled ~1990 with transfer to SANParks	7.2	NA	Conservation	Felled (conservation transfer)	Testing Eucalyptus & Pinus spp.	-33.3471	25.7379	Abandon but develop as picnic site and label the trees	NA	NA	Eastern Cape	1	Conservation	NA	0	0	0	0	1	0	0	0	0	0	1	0	0

## Sheet: Table S3 Metadata
Field	description
Arboretum	Arboretum name
total_families	# of botanical families ever tested at that site
families_today	# of botanical families present at that site today
total_genera	# of genera ever tested at that site
genera_today	# of genera present at that site today
total_taxa	# of taxa ever tested at that site
taxa_today	# of taxa present at that site today
Established	Year the arboretum was established
Ended	Year the arboretum was felled
Fate	What became of the arboretum
Size _original	What was the size at time of establishment (ha)
Size_now	What is the size today (ha)
Ownership	Who owns the land
Cause	The cause of the arboretum not surviving
Original_purpose	What was the arboretum's purpose at the time of establishment
Latitude	Latitude of the arboretum in decimal degrees
Longitude	Longitude of the arbroetum in decimal degrees
P&R Recommendation	Recommendation of Poynton & Rycroft (1986) on the arboretum
Appointment	Is an appointment necessary to visit the site? 1 = yes, 0 = no
Entrance_fee	Is there an entrance fee to visit the site? 1 = yes, 0 = no
Province	In which of the 9 South African provinces does it fall?
Forestry Arb	Was the arboretum started by the Department of Forestry's research division? 1 = yes, 0 = no
Transferred	To whom was the arboretum transferred?
CMS	What is the current management status of the arboretum? ASI = Area of Special Interest
Surviving	Are any of the original trees still standing on site? 1 = yes, 0 = no
Research	The arboretum forms part of a research project, partly or in its entirety. 1 = yes, 0 = no
Education	The arboretum forms part of a research project, partly or in its entirety. 1 = yes, 0 = no
Research & Education	The arboretum forms part of a research project or is used in training, partly or in its entirety. 1 = yes, 0 = no
Poynton & Rycroft (1986)	Is the arboretum mentioned by Poynton & Rycroft (1986)? 1 = yes, 0 = no
Esterhuyse et al. (2001)	Is the arboretum listed by Esteryhuyse et al. (2001)? 1 = yes, 0 = no
Gardener (1991)	Is the arboretum mentioned by Gardener (1991)? 1 = yes, 0 = no
Snowball sampling	Arboretum included in this sruvey but not mentioned by the three sources above. 1 = yes, 0 = no
Updated species list available	Was an updated species list available? 1 = yes, 0 = no
Recent partial species list available	Was a recent partial species list available? 1 = yes, 0 = no
Full species lists available older than 20 years	Was a full species lists available older than 20 years from the curator or archives? 1 = yes, 0 = no
No species list available	Was there any species data available on the arboretum? 1 = yes, 0 = no
National monument	Is the arboretum a national monument or national heritage site? 1 = yes, 0 = no

## Sheet: Table S4 Woody plant taxa
Table S4: Woody plant taxa recorded at 121 arboreta in South Africa
Order	Family	Taxon	Authority citation	# Arboreta	IUCN category	SAPIA	WEBER	Rejmanek Richardson	GISD	PSHB host	Reproductive host	Arctic and sub-Arctic	Euro Siberian Europe	Euro Siberian Asia	Sino Japanese	WC Asiatic	Mediterra-nean	Macaro-nesian	Atlantic N American northern	Atlantic N American southern	Pacific North American	African Indian desert	Sudanese Park Steppe	NE African Highland	West African rainforest	East African Steppe	South African	Madagascar	Ascension and St Helena	Indian	Continental SE Asiatic	Malaysian	Hawaiian	New Caledonia	Melanesia and Micronesia	Polynesia	Caribbean	Venezuela and Guiana	Amazon	South Brazilian	Andean	Pampas	Juan Fernandez	Cape	NE Australian	SW Australian	C Australian	New Zealand	Patagonian
Cupressales	Cupressaceae	× Hesperotropsis leylandii	(A.B. Jacks. & Dallim.) Garland & Gerry Moore	3	Not assessed	0	0	0	0	0	0	0	0	0	0	0	0	0	0	0	1	0	0	0	0	0	0	0	0	0	0	0	0	0	0	0	0	0	0	0	0	0	0	0	0	0	0	0	0
Lamiales	Acanthaceae	× Ruttyruspolia cv. 'Phyllis van Heerden'	A.Meeuse & de Wet	2	NA	0	0	0	0	0	0	0	0	0	0	0	0	0	0	0	0	0	0	0	0	0	1	0	0	0	0	0	0	0	0	0	0	0	0	0	0	0	0	0	0	0	0	0	0
Dipsacales	Caprifoliaceae	Abelia × grandiflora	(André) Rehder	7	Not assessed	0	0	0	0	0	0	0	0	0	0	0	0	0	0	0	0	0	0	0	0	0	0	0	0	0	0	0	0	0	0	0	0	0	0	0	0	0	0	0	0	0	0	0	0
Dipsacales	Caprifoliaceae	Abelia × grandiflora cv. 'Francis Mason'	(André) Rehder	1	NA	0	0	0	0	0	0	0	0	0	0	0	0	0	0	0	0	0	0	0	0	0	0	0	0	0	0	0	0	0	0	0	0	0	0	0	0	0	0	0	0	0	0	0	0
Pinales	Pinaceae	Abies amabilis	Dougl. ex Forbes	1	Least concern	0	0	0	0	0	0	0	0	0	0	0	0	0	0	0	1	0	0	0	0	0	0	0	0	0	0	0	0	0	0	0	0	0	0	0	0	0	0	0	0	0	0	0	0
Pinales	Pinaceae	Abies religiosa	(H.B.K.) Schlecht. & Cham.	2	Least concern	0	0	0	0	0	0	0	0	0	0	0	0	0	0	0	1	0	0	0	0	0	0	0	0	0	0	0	0	0	0	0	1	0	0	0	0	0	0	0	0	0	0	0	0
Malvales	Malvaceae	Abutilon hybridum cv. 'Savitzii'	Hort. ex Voss	1	Not assessed	0	0	0	0	0	0	0	0	0	0	0	0	0	0	0	0	0	0	0	0	0	0	0	0	0	0	0	0	0	0	0	0	0	0	0	0	0	0	0	0	0	0	0	0
Malvales	Malvaceae	Abutilon megapotamicum	(A.Spreng.) A.St.-Hill. & Naudin	1	Not assessed	0	0	0	0	0	0	0	0	0	0	0	0	0	0	0	0	0	0	0	0	0	0	0	0	0	0	0	0	0	0	0	0	0	0	1	0	0	0	0	0	0	0	0	0
Malvales	Malvaceae	Abutilon sonneratianum	(Cav.) Sweet	1	Not assessed	0	0	0	0	0	0	0	0	0	0	0	0	0	0	0	0	0	0	0	0	0	1	0	0	0	0	0	0	0	0	0	0	0	0	0	0	0	0	0	0	0	0	0	0
Fabales	Fabaceae	Acacia adunca	A.Cunn. ex G.Don	1	Not assessed	1	0	0	0	0	0	0	0	0	0	0	0	0	0	0	0	0	0	0	0	0	0	0	0	0	0	0	0	0	0	0	0	0	0	0	0	0	0	0	1	0	0	0	0
Fabales	Fabaceae	Acacia alata	R.Br.	1	Not assessed	0	0	0	0	0	0	0	0	0	0	0	0	0	0	0	0	0	0	0	0	0	0	0	0	0	0	0	0	0	0	0	0	0	0	0	0	0	0	0	0	1	0	0	0
Fabales	Fabaceae	Acacia baileyana	F.Muell.	1	Not assessed	1	1	1	0	0	0	0	0	0	0	0	0	0	0	0	0	0	0	0	0	0	0	0	0	0	0	0	0	0	0	0	0	0	0	0	0	0	0	0	1	0	0	0	0
Fabales	Fabaceae	Acacia cultriformis	A.Cunn.	1	Not assessed	1	0	0	0	0	0	0	0	0	0	0	0	0	0	0	0	0	0	0	0	0	0	0	0	0	0	0	0	0	0	0	0	0	0	0	0	0	0	0	1	0	0	0	0
Fabales	Fabaceae	Acacia cyclops	A.Cunn. ex G.Don	1	Not assessed	1	1	1	0	0	0	0	0	0	0	0	0	0	0	0	0	0	0	0	0	0	0	0	0	0	0	0	0	0	0	0	0	0	0	0	0	0	0	0	0	1	0	0	0
Fabales	Fabaceae	Acacia elata	A.Cunn. ex Benth.	1	Not assessed	1	0	1	0	0	0	0	0	0	0	0	0	0	0	0	0	0	0	0	0	0	0	0	0	0	0	0	0	0	0	0	0	0	0	0	0	0	0	0	1	0	0	0	0
Fabales	Fabaceae	Acacia greggii	A.Gray	1	Least concern	0	0	0	0	0	0	0	0	0	0	0	0	0	0	0	1	0	0	0	0	0	0	0	0	0	0	0	0	0	0	0	0	0	0	0	0	0	0	0	0	0	0	0	0
Fabales	Fabaceae	Acacia longifolia	(Andrews) Willd.	2	Least concern	1	1	1	1	1	1	0	0	0	0	0	0	0	0	0	0	0	0	0	0	0	0	0	0	0	0	0	0	0	0	0	0	0	0	0	0	0	0	0	1	0	0	0	0
Fabales	Fabaceae	Acacia mangium	Willd.	1	Not assessed	0	0	1	1	1	0	0	0	0	0	0	0	0	0	0	0	0	0	0	0	0	0	0	0	0	0	0	0	0	0	0	0	0	0	0	0	0	0	0	1	0	0	0	0
Fabales	Fabaceae	Acacia mearnsii	De Wild.	2	Not assessed	1	1	1	1	1	1	0	0	0	0	0	0	0	0	0	0	0	0	0	0	0	0	0	0	0	0	0	0	0	0	0	0	0	0	0	0	0	0	0	1	0	0	0	0
Fabales	Fabaceae	Acacia melanoxylon	R.Br.	5	Not assessed	1	1	1	1	1	1	0	0	0	0	0	0	0	0	0	0	0	0	0	0	0	0	0	0	0	0	0	0	0	0	0	0	0	0	0	0	0	0	0	1	0	0	0	0
Fabales	Fabaceae	Acacia pendula	A.Cunn.	1	Least concern	0	0	0	0	0	0	0	0	0	0	0	0	0	0	0	0	0	0	0	0	0	0	0	0	0	0	0	0	0	0	0	0	0	0	0	0	0	0	0	1	0	0	0	0
Fabales	Fabaceae	Acacia podalyrifolia	A.Cunn. ex G.Don	2	Not assessed	1	0	1	0	0	0	0	0	0	0	0	0	0	0	0	0	0	0	0	0	0	0	0	0	0	0	0	0	0	0	0	0	0	0	0	0	0	0	0	1	0	0	0	0
Fabales	Fabaceae	Acacia rigens	A.Cunn. ex G.Don	1	Not assessed	0	0	0	0	0	0	0	0	0	0	0	0	0	0	0	0	0	0	0	0	0	0	0	0	0	0	0	0	0	0	0	0	0	0	0	0	0	0	0	1	0	1	0	0
Fabales	Fabaceae	Acacia saligna	(Labill.) H.L.Wendl.	1	Not assessed	1	0	1	1	0	0	0	0	0	0	0	0	0	0	0	0	0	0	0	0	0	0	0	0	0	0	0	0	0	0	0	0	0	0	0	0	0	0	0	0	1	0	0	0
Fabales	Fabaceae	Acacia terminalis	(Salisb.) J.F.Macbr.	1	Not assessed	0	0	0	0	0	0	0	0	0	0	0	0	0	0	0	0	0	0	0	0	0	0	0	0	0	0	0	0	0	0	0	0	0	0	0	0	0	0	0	1	0	0	0	0
Malpighiales	Euphorbiaceae	Acalypha glabrata	Thunb.	2	Least concern	0	0	0	0	0	0	0	0	0	0	0	0	0	0	0	0	0	0	0	0	1	1	0	0	0	0	0	0	0	0	0	0	0	0	0	0	0	0	0	0	0	0	0	0
Malpighiales	Euphorbiaceae	Acalypha sonderiana	Müll. Arg.	1	Not assessed	0	0	0	0	0	0	0	0	0	0	0	0	0	0	0	0	0	0	0	0	1	1	0	0	0	0	0	0	0	0	0	0	0	0	0	0	0	0	0	0	0	0	0	0
Malpighiales	Euphorbiaceae	Acalypha wilkesiana	Muell. Arg.	3	Not assessed	0	0	0	0	0	0	0	0	0	0	0	0	0	0	0	0	0	0	0	0	0	0	0	0	0	0	0	0	0	0	1	0	0	0	0	0	0	0	0	0	0	0	0	0
Myrtales	Myrtaceae	Acca sellowiana	(Berg) Burret	10	Least concern	0	0	0	0	0	0	0	0	0	0	0	0	0	0	0	0	0	0	0	0	0	0	0	0	0	0	0	0	0	0	0	0	0	0	1	0	1	0	0	0	0	0	0	0
Sapindales	Aceraceae	Acer buergerianum	Miq.	20	Least concern	1	0	1	0	1	1	0	0	0	1	0	0	0	0	0	0	0	0	0	0	0	0	0	0	0	0	0	0	0	0	0	0	0	0	0	0	0	0	0	0	0	0	0	0
Sapindales	Aceraceae	Acer campestre	L.	2	Least concern	0	0	0	0	0	0	0	1	0	0	1	0	0	0	0	0	0	0	0	0	0	0	0	0	0	0	0	0	0	0	0	0	0	0	0	0	0	0	0	0	0	0	0	0
Sapindales	Aceraceae	Acer griseum	(Franch.) Pax	1	Endangered	0	0	0	0	0	0	0	0	0	1	0	0	0	0	0	0	0	0	0	0	0	0	0	0	0	0	0	0	0	0	0	0	0	0	0	0	0	0	0	0	0	0	0	0
Sapindales	Aceraceae	Acer japonicum	Thunb.	3	Not assessed	0	0	0	0	0	0	0	0	0	1	0	0	0	0	0	0	0	0	0	0	0	0	0	0	0	0	0	0	0	0	0	0	0	0	0	0	0	0	0	0	0	0	0	0
Sapindales	Aceraceae	Acer negundo	L.	11	Least concern	1	1	1	0	1	1	0	0	0	0	0	0	0	1	1	1	0	0	0	0	0	0	0	0	0	0	0	0	0	0	0	0	0	0	0	0	0	0	0	0	0	0	0	0
Sapindales	Aceraceae	Acer negundo cv. 'Variegata'	L.	2	Least concern	0	0	0	0	0	0	0	0	0	0	0	0	0	0	0	0	0	0	0	0	0	0	0	0	0	0	0	0	0	0	0	0	0	0	0	0	0	0	0	0	0	0	0	0
Sapindales	Aceraceae	Acer oblongum	Wall.	1	Least concern	0	0	0	0	0	0	0	0	0	1	0	0	0	0	0	0	0	0	0	0	0	0	0	0	0	0	0	0	0	0	0	0	0	0	0	0	0	0	0	0	0	0	0	0
Sapindales	Aceraceae	Acer palmatum	Thunb.	10	Least concern	0	0	0	0	1	1	0	0	0	1	0	0	0	0	0	0	0	0	0	0	0	0	0	0	0	0	0	0	0	0	0	0	0	0	0	0	0	0	0	0	0	0	0	0
Sapindales	Aceraceae	Acer palmatum cv. 'Aureum'	Thunb.	1	NA	0	0	0	0	0	0	0	0	0	0	0	0	0	0	0	0	0	0	0	0	0	0	0	0	0	0	0	0	0	0	0	0	0	0	0	0	0	0	0	0	0	0	0	0
Sapindales	Aceraceae	Acer palmatum cv. 'Dissectum Atropurpureum'	Thunb.	2	NA	0	0	0	0	0	0	0	0	0	0	0	0	0	0	0	0	0	0	0	0	0	0	0	0	0	0	0	0	0	0	0	0	0	0	0	0	0	0	0	0	0	0	0	0
Sapindales	Aceraceae	Acer palmatum cv. 'Nuresagi'	Thunb.	1	NA	0	0	0	0	0	0	0	0	0	0	0	0	0	0	0	0	0	0	0	0	0	0	0	0	0	0	0	0	0	0	0	0	0	0	0	0	0	0	0	0	0	0	0	0
Sapindales	Aceraceae	Acer palmatum cv. 'Rubrum'	Thunb.	1	NA	0	0	0	0	0	0	0	0	0	0	0	0	0	0	0	0	0	0	0	0	0	0	0	0	0	0	0	0	0	0	0	0	0	0	0	0	0	0	0	0	0	0	0	0
Sapindales	Aceraceae	Acer palmatum cv. 'Summer Gold'	Thunb.	1	NA	0	0	0	0	0	0	0	0	0	0	0	0	0	0	0	0	0	0	0	0	0	0	0	0	0	0	0	0	0	0	0	0	0	0	0	0	0	0	0	0	0	0	0	0
Sapindales	Aceraceae	Acer palmatum cv. 'Uki-gomo'	Thunb.	1	NA	0	0	0	0	0	0	0	0	0	0	0	0	0	0	0	0	0	0	0	0	0	0	0	0	0	0	0	0	0	0	0	0	0	0	0	0	0	0	0	0	0	0	0	0
Sapindales	Aceraceae	Acer palmatum var. dissectum	(Thunb.) Miq.	1	Not assessed	0	0	0	0	0	0	0	0	0	1	0	0	0	0	0	0	0	0	0	0	0	0	0	0	0	0	0	0	0	0	0	0	0	0	0	0	0	0	0	0	0	0	0	0
Sapindales	Aceraceae	Acer palmatum var. heptalobum	Thunb.	1	Least concern	0	0	0	0	0	0	0	0	0	1	0	0	0	0	0	0	0	0	0	0	0	0	0	0	0	0	0	0	0	0	0	0	0	0	0	0	0	0	0	0	0	0	0	0
Sapindales	Aceraceae	Acer pseudoplatanus	L.	3	Least concern	0	1	1	0	0	0	0	1	0	0	0	1	0	0	0	0	0	0	0	0	0	0	0	0	0	0	0	0	0	0	0	0	0	0	0	0	0	0	0	0	0	0	0	0
Sapindales	Aceraceae	Acer rubrum	L.	2	Least concern	0	0	0	0	0	0	0	0	0	0	0	0	0	1	1	0	0	0	0	0	0	0	0	0	0	0	0	0	0	0	0	0	0	0	0	0	0	0	0	0	0	0	0	0
Sapindales	Aceraceae	Acer saccharinum	L.	2	Least concern	0	0	1	0	1	1	0	0	0	0	0	0	0	1	1	0	0	0	0	0	0	0	0	0	0	0	0	0	0	0	0	0	0	0	0	0	0	0	0	0	0	0	0	0
Sapindales	Aceraceae	Acer saccharum	Marshall	3	Least concern	0	0	0	0	0	0	0	0	0	0	0	0	0	1	1	0	0	0	0	0	0	0	0	0	0	0	0	0	0	0	0	0	0	0	0	0	0	0	0	0	0	0	0	0
Myrtales	Myrtaceae	Acmena smithii	(Poir.) Merr. & L.M.Perry	1	Not assessed	0	0	0	0	0	0	0	0	0	0	0	0	0	0	0	0	0	0	0	0	0	0	0	0	0	0	0	0	0	0	0	0	0	0	0	0	0	0	0	1	0	0	0	0
Gentianales	Apocynaceae	Acokanthera oblongifolia	(Hochst.) Codd	4	Least concern	0	0	0	0	0	0	0	0	0	0	0	0	0	0	0	0	0	0	0	0	0	1	0	0	0	0	0	0	0	0	0	0	0	0	0	0	0	0	0	0	0	0	0	0
Gentianales	Apocynaceae	Acokanthera oppositifolia	(Lam.) Codd	8	Least concern	0	0	0	0	0	0	0	0	0	0	0	0	0	0	0	0	0	0	0	0	1	1	0	0	0	0	0	0	0	0	0	0	0	0	0	0	0	0	0	0	0	0	0	0
Malpighiales	Malpighiaceae	Acridocarpus natalitius	A. Juss.	2	Least concern	0	0	0	0	0	0	0	0	0	0	0	0	0	0	0	0	0	0	0	0	0	1	0	0	0	0	0	0	0	0	0	0	0	0	0	0	0	0	0	0	0	0	0	0
Fabales	Fabaceae	Acrocarpus fraxinifolius	Wight & Arn.	3	Not assessed	0	0	0	0	0	0	0	0	0	1	0	0	0	0	0	0	0	0	0	0	0	0	0	0	0	1	0	0	0	0	0	0	0	0	0	0	0	0	0	0	0	0	0	0
Arecales	Arecaceae	Acrocomia aculeata	(Jacq.) Lodd. ex Mart.	2	Not assessed	0	0	0	0	0	0	0	0	0	0	0	0	0	0	0	0	0	0	0	0	0	0	0	0	0	0	0	0	0	0	0	1	1	1	1	0	0	0	0	0	0	0	0	0
Ericales	Actinidiaceae	Actinidia deliciosa cv. 'Hayward'	(A.Chev.) C.F.Liang & A.R.Ferguson	1	NA	0	0	0	0	0	0	0	0	0	0	0	0	0	0	0	0	0	0	0	0	0	0	0	0	0	0	0	0	0	0	0	0	0	0	0	0	0	0	0	0	0	0	0	0
Ericales	Actinidiaceae	Actinidia deliciosa cv. 'Tomuri'	(A.Chev.) C.F.Liang & A.R.Ferguson	1	NA	0	0	0	0	0	0	0	0	0	0	0	0	0	0	0	0	0	0	0	0	0	0	0	0	0	0	0	0	0	0	0	0	0	0	0	0	0	0	0	0	0	0	0	0
Cupressales	Cupressaceae	Actinostrobus pyrimidalis	Miq.	1	Least concern	0	0	0	0	0	0	0	0	0	0	0	0	0	0	0	0	0	0	0	0	0	0	0	0	0	0	0	0	0	0	0	0	0	0	0	0	0	0	0	0	1	0	0	0
Malvales	Malvaceae	Adansonia digitata	L.	13	Not assessed	0	0	0	0	1	0	0	0	0	0	0	0	0	0	0	0	0	0	0	0	1	1	1	0	0	0	0	0	0	0	0	0	0	0	0	0	0	0	0	0	0	0	0	0
Malvales	Malvaceae	Adansonia rubrostipa	Jum. & H.Perrier	2	Least concern	0	0	0	0	0	0	0	0	0	0	0	0	0	0	0	0	0	0	0	0	0	0	1	0	0	0	0	0	0	0	0	0	0	0	0	0	0	0	0	0	0	0	0	0
Fabales	Fabaceae	Adenanthera pavonina	L.	2	Not assessed	0	0	1	1	0	0	0	0	0	0	0	0	0	0	0	0	0	0	0	0	0	0	0	0	1	0	1	0	0	0	0	0	0	0	0	0	0	0	0	0	0	0	0	0
Malpighiales	Passifloraceae	Adenia fruticosa	Burtt Davy	1	Least concern	0	0	0	0	0	0	0	0	0	0	0	0	0	0	0	0	0	0	0	0	0	1	0	0	0	0	0	0	0	0	0	0	0	0	0	0	0	0	0	0	0	0	0	0
Gentianales	Apocynaceae	Adenium multiflorum	Klotzsch	3	Not assessed	0	0	0	0	0	0	0	0	0	0	0	0	0	0	0	0	0	0	0	0	1	1	0	0	0	0	0	0	0	0	0	0	0	0	0	0	0	0	0	0	0	0	0	0
Gentianales	Apocynaceae	Adenium obesum	(Forssk.) Roem. & Schult.	1	Not assessed	0	0	0	0	0	0	0	0	0	0	0	0	0	0	0	0	1	0	1	0	1	1	0	0	0	0	0	0	0	0	0	0	0	0	0	0	0	0	0	0	0	0	0	0
Arecales	Arecaceae	Adonidia merrillii	(Becc.) Becc.	2	Near threatened	0	0	0	0	0	0	0	0	0	0	0	0	0	0	0	0	0	0	0	0	0	0	0	0	0	0	1	0	0	0	0	0	0	0	0	0	0	0	0	0	0	0	0	0
Sapindales	Hippocastanaceae	Aesculus × carnea	Hayne	3	NA	0	0	0	0	0	0	0	0	0	0	0	0	0	0	0	0	0	0	0	0	0	0	0	0	0	0	0	0	0	0	0	0	0	0	0	0	0	0	0	0	0	0	0	0
Sapindales	Hippocastanaceae	Aesculus hippocastanum	L.	4	Near threatened	0	0	0	0	0	0	0	1	0	0	0	1	0	0	0	0	0	0	0	0	0	0	0	0	0	0	0	0	0	0	0	0	0	0	0	0	0	0	0	0	0	0	0	0
Sapindales	Hippocastanaceae	Aesculus indica	(Wall. ex Cambess.) Hook.	1	Least concern	0	0	0	0	0	0	0	0	0	0	0	0	0	0	0	0	0	0	0	0	0	0	0	0	1	0	0	0	0	0	0	0	0	0	0	0	0	0	0	0	0	0	0	0
Gentianales	Rubiaceae	Afrocanthium mundianum	(Cham. & Schltdl.) Lantz	4	Not assessed	0	0	0	0	0	0	0	0	0	0	0	0	0	0	0	0	0	0	0	0	1	1	0	0	0	0	0	0	0	0	0	0	0	0	0	0	0	0	0	0	0	0	0	0
Podocarpales	Podocarpaceae	Afrocarpus falcatus	(Thunb.) C.N. Page	42	Least concern	0	0	1	0	1	0	0	0	0	0	0	0	0	0	0	0	0	0	0	0	0	1	0	0	0	0	0	0	0	0	0	0	0	0	0	0	0	0	0	0	0	0	0	0
Podocarpales	Podocarpaceae	Afrocarpus gracilior	(Pilg.) C.N.Page	1	Least concern	0	0	0	0	0	0	0	0	0	0	0	0	0	0	0	0	0	0	1	0	1	0	0	0	0	0	0	0	0	0	0	0	0	0	0	0	0	0	0	0	0	0	0	0
Fabales	Fabaceae	Afzelia quanzensis	Welw.	6	Least concern	0	0	0	0	1	1	0	0	0	0	0	0	0	0	0	0	0	0	1	0	1	1	0	0	0	0	0	0	0	0	0	0	0	0	0	0	0	0	0	0	0	0	0	0
Araucariales	Araucariaceae	Agathis australis	(D.Don) Loudon	4	Not assessed	0	0	0	0	0	0	0	0	0	0	0	0	0	0	0	0	0	0	0	0	0	0	0	0	0	0	0	0	0	0	0	0	0	0	0	0	0	0	0	0	0	0	1	0
Araucariales	Araucariaceae	Agathis robusta	(C.Moore ex F.Muell.) F.Muell.	11	Least concern	0	0	0	0	0	0	0	0	0	0	0	0	0	0	0	0	0	0	0	0	0	0	0	0	0	0	0	0	0	0	0	0	0	0	0	0	0	0	0	1	0	0	0	0
Sapindales	Rutaceae	Agathosma crenulata	(L.) Pillans	1	Not assessed	0	0	0	0	0	0	0	0	0	0	0	0	0	0	0	0	0	0	0	0	0	0	0	0	0	0	0	0	0	0	0	0	0	0	0	0	0	0	1	0	0	0	0	0
Santalales	Loranthaceae	Agelanthus crassifolius	(Wiens) Polhill & Wiens	1	Not assessed	0	0	0	0	0	0	0	0	0	0	0	0	0	0	0	0	0	0	0	0	0	1	0	0	0	0	0	0	0	0	0	0	0	0	0	0	0	0	0	0	0	0	0	0
Myrtales	Myrtaceae	Agonis flexuosa	(Spreng.) Schauer	2	Not assessed	0	0	0	0	0	0	0	0	0	0	0	0	0	0	0	0	0	0	0	0	0	0	0	0	0	0	0	0	0	0	0	0	0	0	0	0	0	0	0	0	1	0	0	0
Sapindales	Simaroubaceae	Ailanthus altissima	(Mill.) Swingle	4	Not assessed	1	1	1	1	1	0	0	0	0	1	0	0	0	0	0	0	0	0	0	0	0	0	0	0	0	0	0	0	0	0	0	0	0	0	0	0	0	0	0	0	0	0	0	0
Arecales	Arecaceae	Aiphanes horrida	(Jacq.) Burret	1	Not assessed	0	0	0	0	0	0	0	0	0	0	0	0	0	0	0	0	0	0	0	0	0	0	0	0	0	0	0	0	0	0	0	0	1	1	0	0	0	0	0	0	0	0	0	0
Arecales	Arecaceae	Aiphanes minima	(Gaertn.) Burret	1	Not assessed	0	0	0	0	0	0	0	0	0	0	0	0	0	0	0	0	0	0	0	0	0	0	0	0	0	0	0	0	0	0	0	1	0	0	0	0	0	0	0	0	0	0	0	0
Gentianales	Rubiaceae	Alberta magna	E.Mey.	6	Least concern	0	0	0	0	0	0	0	0	0	0	0	0	0	0	0	0	0	0	0	0	0	1	0	0	0	0	0	0	0	0	0	0	0	0	0	0	0	0	0	0	0	0	0	0
Fabales	Fabaceae	Albizia adianthifolia	(Schumach.) W. Wight	13	Least concern	0	0	0	0	1	0	0	0	0	0	0	0	0	0	0	0	0	0	0	1	1	1	0	0	0	0	0	0	0	0	0	0	0	0	0	0	0	0	0	0	0	0	0	0
Fabales	Fabaceae	Albizia amara	(Roxb.) Boivin	1	Least concern	0	0	0	0	0	0	0	0	0	0	0	0	0	0	0	0	0	1	1	0	1	1	0	0	1	0	0	0	0	0	0	0	0	0	0	0	0	0	0	0	0	0	0	0
Fabales	Fabaceae	Albizia chinensis	(Osbeck) Merr.	1	Not assessed	1	0	1	0	0	0	0	0	0	1	0	0	0	0	0	0	0	0	0	0	0	0	0	0	0	1	0	0	0	0	0	0	0	0	0	0	0	0	0	0	0	0	0	0
Fabales	Fabaceae	Albizia forbesii	Benth.	1	Not assessed	0	0	0	0	0	0	0	0	0	0	0	0	0	0	0	0	0	0	0	0	1	1	0	0	0	0	0	0	0	0	0	0	0	0	0	0	0	0	0	0	0	0	0	0
Fabales	Fabaceae	Albizia gummifera	(J.F.Gmel.) C.A.Sm.	1	Least concern	0	0	0	0	0	0	0	0	0	0	0	0	0	0	0	0	0	1	0	1	1	1	1	0	0	0	0	0	0	0	0	0	0	0	0	0	0	0	0	0	0	0	0	0
Fabales	Fabaceae	Albizia harveyi	E.Fourn.	1	Least concern	0	0	0	0	0	0	0	0	0	0	0	0	0	0	0	0	0	0	0	0	1	1	0	0	0	0	0	0	0	0	0	0	0	0	0	0	0	0	0	0	0	0	0	0
Fabales	Fabaceae	Albizia julibrissin	Durazz.	2	Not assessed	0	1	1	1	1	1	0	0	0	1	0	0	0	0	0	0	0	0	0	0	0	0	0	0	0	1	0	0	0	0	0	0	0	0	0	0	0	0	0	0	0	0	0	0
Fabales	Fabaceae	Albizia lebbeck	(L.) Benth.	2	Not assessed	1	1	1	1	0	0	0	0	0	0	0	0	0	0	0	0	0	0	0	0	0	0	0	0	0	1	0	0	0	0	0	0	0	0	0	0	0	0	0	0	0	0	0	0
Fabales	Fabaceae	Albizia procera	(Roxb.) Benth.	1	Least concern	1	0	1	0	0	0	0	0	0	0	0	0	0	0	0	0	0	0	0	0	0	0	0	0	0	1	1	0	0	0	0	0	0	0	0	0	0	0	0	1	0	0	0	0
Fabales	Fabaceae	Albizia suluensis	Gerstner	4	Endangered	0	0	0	0	0	0	0	0	0	0	0	0	0	0	0	0	0	0	0	0	0	1	0	0	0	0	0	0	0	0	0	0	0	0	0	0	0	0	0	0	0	0	0	0
Fabales	Fabaceae	Albizia tanganyicensis	Baker f.	2	Least concern	0	0	0	0	0	0	0	0	0	0	0	0	0	0	0	0	0	0	0	0	1	1	0	0	0	0	0	0	0	0	0	0	0	0	0	0	0	0	0	0	0	0	0	0
Fabales	Fabaceae	Albizia tanganyicensis subsp. adamsoniorum	Brenan	1	Vulnerable	0	0	0	0	0	0	0	0	0	0	0	0	0	0	0	0	0	0	0	0	1	0	0	0	0	0	0	0	0	0	0	0	0	0	0	0	0	0	0	0	0	0	0	0
Fabales	Fabaceae	Albizia versicolor	Welw. ex Oliv.	7	Least concern	0	0	0	0	0	0	0	0	0	0	0	0	0	0	0	0	0	0	0	0	1	1	0	0	0	0	0	0	0	0	0	0	0	0	0	0	0	0	0	0	0	0	0	0
Sapindales	Sapindaceae	Alectryon excelsus	Gaertn.	1	Least concern	0	0	0	0	1	0	0	0	0	0	0	0	0	0	0	0	0	0	0	0	0	0	0	0	0	0	0	0	0	0	0	0	0	0	0	0	0	0	0	0	0	0	1	0
Malpighiales	Euphorbiaceae	Aleurites moluccanus	(L.) Willd.	1	Least concern	1	0	0	1	0	0	0	0	0	0	0	0	0	0	0	0	0	0	0	0	0	0	0	0	0	0	1	0	0	0	0	0	0	0	0	0	0	0	0	0	0	0	0	0
Gentianales	Apocynaceae	Allamanda blanchetii	A.DC.	1	Not assessed	0	0	0	0	0	0	0	0	0	0	0	0	0	0	0	0	0	0	0	0	0	0	0	0	0	0	0	0	0	0	0	0	0	0	1	0	0	0	0	0	0	0	0	0
Gentianales	Apocynaceae	Allamanda cathartica	L.	1	Not assessed	0	0	0	0	0	0	0	0	0	0	0	0	0	0	0	0	0	0	0	0	0	0	0	0	0	0	0	0	0	0	0	1	1	0	0	0	0	0	0	0	0	0	0	0
Gentianales	Apocynaceae	Allamanda schottii	Pohl	2	Not assessed	0	0	0	0	0	0	0	0	0	0	0	0	0	0	0	0	0	0	0	0	0	0	0	0	0	0	0	0	0	0	0	0	1	1	1	0	0	0	0	0	0	0	0	0
Celastrales	Celastraceae	Allocassine laurifolia	(Harv.) N. Robson	1	Not assessed	0	0	0	0	0	0	0	0	0	0	0	0	0	0	0	0	0	0	0	0	0	1	0	0	0	0	0	0	0	0	0	0	0	0	0	0	0	0	0	0	0	0	0	0
Fagales	Casuarinaceae	Allocasuarina littoralis	(Salisb.) L.A.S.Johnson	1	Not assessed	0	0	0	0	0	0	0	0	0	0	0	0	0	0	0	0	0	0	0	0	0	0	0	0	0	0	0	0	0	0	0	0	0	0	0	0	0	0	0	1	0	0	0	0
Fagales	Casuarinaceae	Allocasuarina torulosa	(Aiton) L.A.S.Johnson	3	Not assessed	0	0	0	0	0	0	0	0	0	0	0	0	0	0	0	0	0	0	0	0	0	0	0	0	0	0	0	0	0	0	0	0	0	0	0	0	0	0	0	1	0	0	0	0
Sapindales	Sapindaceae	Allophylus africanus	P. Beauv.	1	Least concern	0	0	0	0	0	0	0	0	0	0	0	0	0	0	0	0	0	0	0	1	1	1	0	0	0	0	0	0	0	0	0	0	0	0	0	0	0	0	0	0	0	0	0	0
Sapindales	Sapindaceae	Allophylus dregeanus	(Sond.) De Winter	4	Least concern	0	0	0	0	0	0	0	0	0	0	0	0	0	0	0	0	0	0	0	0	0	1	0	0	0	0	0	0	0	0	0	0	0	0	0	0	0	0	0	0	0	0	0	0
Sapindales	Sapindaceae	Allophylus melanocarpus	(Sond.) Radlk.	1	Least concern	0	0	0	0	0	0	0	0	0	0	0	0	0	0	0	0	0	0	0	0	0	1	0	0	0	0	0	0	0	0	0	0	0	0	0	0	0	0	0	0	0	0	0	0
Sapindales	Sapindaceae	Allophylus natalensis	(Sond.) De Winter	6	Least concern	0	0	0	0	0	0	0	0	0	0	0	0	0	0	0	0	0	0	0	0	0	1	0	0	0	0	0	0	0	0	0	0	0	0	0	0	0	0	0	0	0	0	0	0
Caryophyllales	Didiereaceae	Alluaudia comosa	(Drake) Drake	1	Vulnerable	0	0	0	0	0	0	0	0	0	0	0	0	0	0	0	0	0	0	0	0	0	0	1	0	0	0	0	0	0	0	0	0	0	0	0	0	0	0	0	0	0	0	0	0
Caryophyllales	Didiereaceae	Alluaudia dumosa	(Drake) Drake	1	Least concern	0	0	0	0	0	0	0	0	0	0	0	0	0	0	0	0	0	0	0	0	0	0	1	0	0	0	0	0	0	0	0	0	0	0	0	0	0	0	0	0	0	0	0	0
Caryophyllales	Didiereaceae	Alluaudia humbertii	Choux	1	Not assessed	0	0	0	0	0	0	0	0	0	0	0	0	0	0	0	0	0	0	0	0	0	0	1	0	0	0	0	0	0	0	0	0	0	0	0	0	0	0	0	0	0	0	0	0
Caryophyllales	Didiereaceae	Alluaudia montagnacii	Rauh	1	Endangered	0	0	0	0	0	0	0	0	0	0	0	0	0	0	0	0	0	0	0	0	0	0	1	0	0	0	0	0	0	0	0	0	0	0	0	0	0	0	0	0	0	0	0	0
Caryophyllales	Didiereaceae	Alluaudia procera	(Drake) Drake	4	Least concern	0	0	0	0	0	0	0	0	0	0	0	0	0	0	0	0	0	0	0	0	0	0	1	0	0	0	0	0	0	0	0	0	0	0	0	0	0	0	0	0	0	0	0	0
Fagales	Betulaceae	Alnus cordata	Desf.	1	Least concern	0	0	0	0	0	0	0	0	0	0	0	1	0	0	0	0	0	0	0	0	0	0	0	0	0	0	0	0	0	0	0	0	0	0	0	0	0	0	0	0	0	0	0	0
Fagales	Betulaceae	Alnus formosana	(Burkill) Makino	1	Least concern	0	0	0	0	0	0	0	0	0	1	0	0	0	0	0	0	0	0	0	0	0	0	0	0	0	0	0	0	0	0	0	0	0	0	0	0	0	0	0	0	0	0	0	0
Fagales	Betulaceae	Alnus glutinosa	(L.) Gaertn.	4	Least concern	1	0	1	1	0	0	0	0	0	0	0	0	0	1	0	0	0	0	0	0	0	0	0	0	0	0	0	0	0	0	0	0	0	0	0	0	0	0	0	0	0	0	0	0
Fagales	Betulaceae	Alnus rubra	Bong.	3	Least concern	0	0	0	0	0	0	0	0	0	0	0	0	0	0	0	1	0	0	0	0	0	0	0	0	0	0	0	0	0	0	0	0	0	0	0	0	0	0	0	0	0	0	0	0
Asparagales	Asphodelaceae	Aloe africana	Mill.	1	Not assessed	0	0	0	0	0	0	0	0	0	0	0	0	0	0	0	0	0	0	0	0	0	1	0	0	0	0	0	0	0	0	0	0	0	0	0	0	0	0	0	0	0	0	0	0
Asparagales	Asphodelaceae	Aloe arborescens	Mill.	6	Least concern	0	0	0	0	0	0	0	0	0	0	0	0	0	0	0	0	0	0	0	0	1	1	0	0	0	0	0	0	0	0	0	0	0	0	0	0	0	0	0	0	0	0	0	0
Asparagales	Asphodelaceae	Aloe castanea	Schönland	2	Not assessed	0	0	0	0	0	0	0	0	0	0	0	0	0	0	0	0	0	0	0	0	0	1	0	0	0	0	0	0	0	0	0	0	0	0	0	0	0	0	0	0	0	0	0	0
Asparagales	Asphodelaceae	Aloe dichotomum	(Masson) Klopper & Gideon F.Sm.	1	Not assessed	0	0	0	0	0	0	0	0	0	0	0	0	0	0	0	0	0	0	0	0	0	1	0	0	0	0	0	0	0	0	0	0	0	0	0	0	0	0	0	0	0	0	0	0
Asparagales	Asphodelaceae	Aloe ferox	Mill.	2	Not assessed	0	0	0	0	0	0	0	0	0	0	0	0	0	0	0	0	0	0	0	0	0	1	0	0	0	0	0	0	0	0	0	0	0	0	0	0	0	0	0	0	0	0	0	0
Asparagales	Asphodelaceae	Aloe marlothii	A. Berger	4	Least concern	0	0	0	0	0	0	0	0	0	0	0	0	0	0	0	0	0	0	0	0	0	1	0	0	0	0	0	0	0	0	0	0	0	0	0	0	0	0	0	0	0	0	0	0
Asparagales	Asphodelaceae	Aloe marlothii subsp. orientalis	Glen & D.S. Hardy	1	Not assessed	0	0	0	0	0	0	0	0	0	0	0	0	0	0	0	0	0	0	0	0	0	1	0	0	0	0	0	0	0	0	0	0	0	0	0	0	0	0	0	0	0	0	0	0
Asparagales	Asphodelaceae	Aloe mawii	Christian	1	Least concern	0	0	0	0	0	0	0	0	0	0	0	0	0	0	0	0	0	0	0	0	1	0	0	0	0	0	0	0	0	0	0	0	0	0	0	0	0	0	0	0	0	0	0	0
Asparagales	Asphodelaceae	Aloe pluridens	Haw.	2	Not assessed	0	0	0	0	0	0	0	0	0	0	0	0	0	0	0	0	0	0	0	0	0	1	0	0	0	0	0	0	0	0	0	0	0	0	0	0	0	0	0	0	0	0	0	0
Asparagales	Asphodelaceae	Aloe rupestris	Baker	3	Least concern	0	0	0	0	0	0	0	0	0	0	0	0	0	0	0	0	0	0	0	0	0	1	0	0	0	0	0	0	0	0	0	0	0	0	0	0	0	0	0	0	0	0	0	0
Asparagales	Asphodelaceae	Aloe sabaea	Schweinf.	1	Not assessed	0	0	0	0	0	0	0	0	0	0	0	0	0	0	0	0	1	0	0	0	0	0	0	0	0	0	0	0	0	0	0	0	0	0	0	0	0	0	0	0	0	0	0	0
Asparagales	Asphodelaceae	Aloe thraskii	Baker	1	Not assessed	0	0	0	0	0	0	0	0	0	0	0	0	0	0	0	0	0	0	0	0	0	1	0	0	0	0	0	0	0	0	0	0	0	0	0	0	0	0	0	0	0	0	0	0
Asparagales	Asphodelaceae	Aloestrela suzannae	(Decary) Molteno & Gideon F.Sm.	1	Endangered	0	0	0	0	0	0	0	0	0	0	0	0	0	0	0	0	0	0	0	0	0	0	1	0	0	0	0	0	0	0	0	0	0	0	0	0	0	0	0	0	0	0	0	0
Asparagales	Asphodelaceae	Aloidendron barberae	(Dyer) Klopper & Gideon F.Sm.	17	Not assessed	0	0	0	0	0	0	0	0	0	0	0	0	0	0	0	0	0	0	0	0	1	1	0	0	0	0	0	0	0	0	0	0	0	0	0	0	0	0	0	0	0	0	0	0
Asparagales	Asphodelaceae	Aloidendron dichotomum	(Masson) Klopper & Gideon F.Sm.	7	Not assessed	0	0	0	0	0	0	0	0	0	0	0	0	0	0	0	0	0	0	0	0	0	1	0	0	0	0	0	0	0	0	0	0	0	0	0	0	0	0	0	0	0	0	0	0
Asparagales	Asphodelaceae	Aloidendron eminens	(Reynolds & P.R.O. Bally) Klopper & Gideon F.Sm.	1	Not assessed	0	0	0	0	0	0	0	0	0	0	0	0	0	0	0	0	0	0	1	0	0	0	0	0	0	0	0	0	0	0	0	0	0	0	0	0	0	0	0	0	0	0	0	0
Asparagales	Asphodelaceae	Aloidendron pillansii	(L.Guthrie) Klopper & Gideon F.Sm.	1	Critically endangered	0	0	0	0	0	0	0	0	0	0	0	0	0	0	0	0	0	0	0	0	0	1	0	0	0	0	0	0	0	0	0	0	0	0	0	0	0	0	0	0	0	0	0	0
Asparagales	Asphodelaceae	Aloidendron ramosissimum	(Pillans) Klopper & Gideon F.Sm.	1	Vulnerable	0	0	0	0	0	0	0	0	0	0	0	0	0	0	0	0	0	0	0	0	0	1	0	0	0	0	0	0	0	0	0	0	0	0	0	0	0	0	0	0	0	0	0	0
Asparagales	Asphodelaceae	Aloidendron tongaense	(Van Jaarsv.) Klopper & Gideon.F.Sm.	1	Not assessed	0	0	0	0	0	0	0	0	0	0	0	0	0	0	0	0	0	0	0	0	0	1	0	0	0	0	0	0	0	0	0	0	0	0	0	0	0	0	0	0	0	0	0	0
Gentianales	Apocynaceae	Alstonia macrophylla	Wall. ex G.Don	1	Least concern	0	0	1	0	0	0	0	0	0	0	0	0	0	0	0	0	0	0	0	0	0	0	0	0	0	1	0	0	0	0	0	0	0	0	0	0	0	0	0	0	0	0	0	0
Fabales	Fabaceae	Amblygonocarpus andongensis	(Welw. ex Oliv.) Exell & Torre	3	Least concern	0	0	0	0	0	0	0	0	0	0	0	0	0	0	0	0	0	1	0	1	1	0	0	0	0	0	0	0	0	0	0	0	0	0	0	0	0	0	0	0	0	0	0	0
Lamiales	Bignoniaceae	Amphilophium buccinatorium	(DC.) L.G.Lohmann	2	Not assessed	0	0	0	0	0	0	0	0	0	0	0	0	0	0	0	0	0	0	0	0	0	0	0	0	0	0	0	0	0	0	0	1	0	0	0	0	0	0	0	0	0	0	0	0
Lamiales	Bignoniaceae	Amphilophium buccinatorium cv. 'Mrs. Rivers'	(DC.) L.G.Lohmann	1	NA	0	0	0	0	0	0	0	0	0	0	0	0	0	0	0	0	0	0	0	0	0	0	0	0	0	0	0	0	0	0	0	0	0	0	0	0	0	0	0	0	0	0	0	0
Lamiales	Bignoniaceae	Amphilophium lactiflorum	(Vahl) L.G.Lohmann	1	Not assessed	0	0	0	0	0	0	0	0	0	0	0	0	0	0	0	0	0	0	0	0	0	0	0	0	0	0	0	0	0	0	0	1	1	0	0	0	0	0	0	0	0	0	0	0
Sapindales	Anacardiaceae	Anacardium occidentale	L.	1	Not assessed	0	0	1	0	0	0	0	0	0	0	0	0	0	0	0	0	0	0	0	0	0	0	0	0	0	0	0	0	0	0	0	0	1	1	0	0	0	0	0	0	0	0	0	0
Lamiales	Scrophulariaceae	Anastrabe integerrima	E.Mey. ex Benth.	4	Least concern	0	0	0	0	0	0	0	0	0	0	0	0	0	0	0	0	0	0	0	0	0	1	0	0	0	0	0	0	0	0	0	0	0	0	0	0	0	0	0	0	0	0	0	0
Gentianales	Apocynaceae	Ancylobotrys capensis	(Oliv.) Pichon	2	Not assessed	0	0	0	0	0	0	0	0	0	0	0	0	0	0	0	0	0	0	0	0	0	1	0	0	0	0	0	0	0	0	0	0	0	0	0	0	0	0	0	0	0	0	0	0
Malpighiales	Picrodendraceae	Androstachys johnsonii	Prain	6	Least concern	0	0	0	0	0	0	0	0	0	0	0	0	0	0	0	0	0	0	0	0	0	1	1	0	0	0	0	0	0	0	0	0	0	0	0	0	0	0	0	0	0	0	0	0
Myrtales	Myrtaceae	Angophora costata	(Gaertn.) Britten	4	Not assessed	0	0	0	0	0	0	0	0	0	0	0	0	0	0	0	0	0	0	0	0	0	0	0	0	0	0	0	0	0	0	0	0	0	0	0	0	0	0	0	1	0	0	0	0
Myrtales	Myrtaceae	Angophora floribunda	(Sm.) Sweet	1	Near threatened	0	0	0	0	0	0	0	0	0	0	0	0	0	0	0	0	0	0	0	0	0	0	0	0	0	0	0	0	0	0	0	0	0	0	0	0	0	0	0	1	0	0	0	0
Myrtales	Myrtaceae	Angophora subvelutina	F.Muell.	1	Least concern	0	0	0	0	0	0	0	0	0	0	0	0	0	0	0	0	0	0	0	0	0	0	0	0	0	0	0	0	0	0	0	0	0	0	0	0	0	0	0	1	0	0	0	0
Myrtales	Myrtaceae	Angophora woodsiana	F.M.Bailey	1	Least concern	0	0	0	0	0	0	0	0	0	0	0	0	0	0	0	0	0	0	0	0	0	0	0	0	0	0	0	0	0	0	0	0	0	0	0	0	0	0	0	1	0	0	0	0
Malvales	Malvaceae	Anisodontea scabrosa	(L.) Bates	1	Not assessed	0	0	0	0	1	1	0	0	0	0	0	0	0	0	0	0	0	0	0	0	0	1	0	0	0	0	0	0	0	0	0	0	0	0	0	0	0	0	0	0	0	0	0	0
Malvales	Malvaceae	Anisodontea scabrosa cv. 'Ladies Pink'	(L.) Bates	1	NA	0	0	0	0	0	0	0	0	0	0	0	0	0	0	0	0	0	0	0	0	0	0	0	0	0	0	0	0	0	0	0	0	0	0	0	0	0	0	0	0	0	0	0	0
Magnoliales	Annonaceae	Annona cherimola	Mill.	1	Least concern	0	0	1	0	0	0	0	0	0	0	0	0	0	0	0	0	0	0	0	0	0	0	0	0	0	0	0	0	0	0	0	0	0	1	1	0	0	0	0	0	0	0	0	0
Magnoliales	Annonaceae	Annona diversifolia	Saff.	1	Not assessed	0	0	0	0	0	0	0	0	0	0	0	0	0	0	0	0	0	0	0	0	0	0	0	0	0	0	0	0	0	0	0	1	0	0	0	0	0	0	0	0	0	0	0	0
Magnoliales	Annonaceae	Annona muricata	L.	2	Not assessed	0	0	0	0	0	0	0	0	0	0	0	0	0	0	0	0	0	0	0	0	0	0	0	0	0	0	0	0	0	0	0	1	1	0	0	0	0	0	0	0	0	0	0	0
Magnoliales	Annonaceae	Annona reticulata	L.	1	Least concern	0	0	0	0	0	0	0	0	0	0	0	0	0	0	0	0	0	0	0	0	0	0	0	0	0	0	0	0	0	0	0	1	0	0	0	0	0	0	0	0	0	0	0	0
Magnoliales	Annonaceae	Annona senegalensis	Pers.	4	Not assessed	0	0	0	0	0	0	0	0	0	0	0	0	0	0	0	0	0	0	0	0	1	1	0	0	0	0	0	0	0	0	0	0	0	0	0	0	0	0	0	0	0	0	0	0
Gentianales	Gentianaceae	Anthocleista grandiflora	Gilg	10	Not assessed	0	0	0	0	0	0	0	0	0	0	0	0	0	0	0	0	0	0	0	0	0	1	1	0	0	0	0	0	0	0	0	0	0	0	0	0	0	0	0	0	0	0	0	0
Malpighiales	Phyllanthaceae	Antidesma venosum	E.Mey. ex Tul.	13	Not assessed	0	0	0	0	0	0	0	0	0	0	0	0	0	0	0	0	0	1	0	1	1	1	0	0	0	0	0	0	0	0	0	0	0	0	0	0	0	0	0	0	0	0	0	0
Malpighiales	Phyllanthaceae	Antidesma vogelianum	Müll. Arg.	1	Not assessed	0	0	0	0	0	0	0	0	0	0	0	0	0	0	0	0	0	0	1	1	1	0	0	0	0	0	0	0	0	0	0	0	0	0	0	0	0	0	0	0	0	0	0	0
Caryophyllales	Polygonaceae	Antigonon leptopus	Hook. & Arn.	1	Not assessed	1	0	0	1	0	0	0	0	0	0	0	0	0	0	0	0	0	0	0	0	0	0	0	0	0	0	0	0	0	0	0	1	0	0	0	0	0	0	0	0	0	0	0	0
Sapindales	Meliaceae	Aphanamixis polystachya	(Wall.) R.Parker	2	Least concern	0	0	0	0	0	0	0	0	0	0	0	0	0	0	0	0	0	0	0	0	0	0	0	0	1	1	0	1	0	1	0	0	0	0	0	0	0	0	0	0	0	0	0	0
Crossosomatales	Aphloiaceae	Aphloia theiformis	(Vahl) Benn.	3	Least concern	0	0	0	0	0	0	0	0	0	0	0	0	0	0	0	0	0	0	0	0	1	1	1	0	0	0	0	0	0	0	0	0	0	0	0	0	0	0	0	0	0	0	0	0
Icacinales	Metteniusaceae	Apodytes abbottii	M.J. Potgieter & A.E. van Wyk	3	Not assessed	0	0	0	0	0	0	0	0	0	0	0	0	0	0	0	0	0	0	0	0	0	1	0	0	0	0	0	0	0	0	0	0	0	0	0	0	0	0	0	0	0	0	0	0
Icacinales	Metteniusaceae	Apodytes dimidiata	E.Mey.	18	Not assessed	0	0	0	0	0	0	0	0	0	0	0	0	0	0	0	0	0	0	0	0	1	1	1	0	1	1	0	0	0	0	0	0	0	0	0	0	0	0	0	0	0	0	0	0
Icacinales	Metteniusaceae	Apodytes geldenhuysii	A.E. van Wyk & Potg.	2	Not assessed	0	0	0	0	0	0	0	0	0	0	0	0	0	0	0	0	0	0	0	0	0	0	0	0	0	0	0	0	0	0	0	0	0	0	0	0	0	0	1	0	0	0	0	0
Araucariales	Araucariaceae	Araucaria angustifolia	(Bertol.) Kuntze	2	Critically endangered	0	0	0	0	0	0	0	0	0	0	0	0	0	0	0	0	0	0	0	0	0	0	0	0	0	0	0	0	0	0	0	0	0	0	1	0	0	0	0	0	0	0	0	0
Araucariales	Araucariaceae	Araucaria araucana	(Molina) K.Koch	5	Endangered	0	0	1	0	0	0	0	0	0	0	0	0	0	0	0	0	0	0	0	0	0	0	0	0	0	0	0	0	0	0	0	0	0	0	0	1	0	0	0	0	0	0	0	0
Araucariales	Araucariaceae	Araucaria bidwillii	Hook.	19	Least concern	1	0	0	0	0	0	0	0	0	0	0	0	0	0	0	0	0	0	0	0	0	0	0	0	0	0	0	0	0	0	0	0	0	0	0	0	0	0	0	1	0	0	0	0
Araucariales	Araucariaceae	Araucaria columnaris	(J.R. Forst.) Hook.	14	Least concern	0	0	0	0	0	0	0	0	0	0	0	0	0	0	0	0	0	0	0	0	0	0	0	0	0	0	0	0	1	0	0	0	0	0	0	0	0	0	0	0	0	0	0	0
Araucariales	Araucariaceae	Araucaria cunninghamii	Aiton ex D.Don	11	Least concern	0	0	0	0	0	0	0	0	0	0	0	0	0	0	0	0	0	0	0	0	0	0	0	0	0	0	0	0	0	0	0	0	0	0	0	0	0	0	0	1	0	0	0	0
Araucariales	Araucariaceae	Araucaria cunninghamii var. papuana	Lauterb.	1	Not assessed	0	0	0	0	0	0	0	0	0	0	0	0	0	0	0	0	0	0	0	0	0	0	0	0	0	0	1	0	0	0	0	0	0	0	0	0	0	0	0	0	0	0	0	0
Araucariales	Araucariaceae	Araucaria cunninhamia	Aiton ex D.Don	2	Least concern	0	0	0	0	0	0	0	0	0	0	0	0	0	0	0	0	0	0	0	0	0	0	0	0	0	0	0	0	0	0	0	0	0	0	0	0	0	0	0	1	0	0	0	0
Araucariales	Araucariaceae	Araucaria heterophylla	(Salisb.) Franco	14	Vulnerable	0	0	0	0	0	0	0	0	0	0	0	0	0	0	0	0	0	0	0	0	0	0	0	0	0	0	0	0	0	0	0	0	0	0	0	0	0	0	0	1	0	0	0	0
Araucariales	Araucariaceae	Araucaria rulei	F.Muell.	2	Endangered	0	0	0	0	0	0	0	0	0	0	0	0	0	0	0	0	0	0	0	0	0	0	0	0	0	0	0	0	1	0	0	0	0	0	0	0	0	0	0	0	0	0	0	0
Ericales	Ericaceae	Arbutus unedo	L.	9	Least concern	0	0	1	0	1	0	0	0	0	0	0	1	0	0	0	0	0	0	0	0	0	0	0	0	0	0	0	0	0	0	0	0	0	0	0	0	0	0	0	0	0	0	0	0
Fabales	Fabaceae	Archidendron bigeminum	(L.) I.C.Nielsen	1	Not assessed	0	0	0	0	0	0	0	0	0	0	0	0	0	0	0	0	0	0	0	0	0	0	0	0	1	0	0	0	0	0	0	0	0	0	0	0	0	0	0	0	0	0	0	0
Arecales	Arecaceae	Archontophoenix alexandrae	(F.Muell.) H.Wendl. & Drude	4	Not assessed	0	0	1	0	0	0	0	0	0	0	0	0	0	0	0	0	0	0	0	0	0	0	0	0	0	0	0	0	0	0	0	0	0	0	0	0	0	0	0	1	0	0	0	0
Arecales	Arecaceae	Archontophoenix cunninghamiana	(H.Wendl.) H.Wendl. & Drude	7	Not assessed	0	0	1	1	0	0	0	0	0	0	0	0	0	0	0	0	0	0	0	0	0	0	0	0	0	0	0	0	0	0	0	0	0	0	0	0	0	0	0	1	0	0	0	0
Ericales	Myrsinaceae	Ardisia crenata	Sims	2	Not assessed	1	1	1	1	0	0	0	0	0	1	0	0	0	0	0	0	0	0	0	0	0	0	0	0	1	1	0	0	0	0	0	0	0	0	0	0	0	0	0	0	0	0	0	0
Ericales	Myrsinaceae	Ardisia humilis	Vahl	1	Not assessed	0	0	0	0	0	0	0	0	0	0	0	0	0	0	0	0	0	0	0	0	0	0	0	0	0	1	0	0	0	0	0	0	0	0	0	0	0	0	0	0	0	0	0	0
Piperales	Aristolochiaceae	Aristolochia gigantea	Sw.	1	Not assessed	0	0	0	0	0	0	0	0	0	0	0	0	0	0	0	0	0	0	0	0	0	0	0	0	0	0	0	0	0	0	0	1	0	0	0	0	0	0	0	0	0	0	0	0
Magnoliales	Annonaceae	Artabotrys hexapetalus	(L.f.) Bhandari	2	Not assessed	0	0	0	0	0	0	0	0	0	1	0	0	0	0	0	0	0	0	0	0	0	0	0	0	1	0	0	0	0	0	0	0	0	0	0	0	0	0	0	0	0	0	0	0
Rosales	Moraceae	Artocarpus altilis	(Parkinson) Fosberg	1	Not assessed	0	0	0	0	0	0	0	0	0	0	0	0	0	0	0	0	0	0	0	0	0	0	0	0	0	0	1	0	0	0	0	0	0	0	0	0	0	0	0	0	0	0	0	0
Rosales	Moraceae	Artocarpus camansi	Blanco	1	Not assessed	0	0	0	0	0	0	0	0	0	0	0	0	0	0	0	0	0	0	0	0	0	0	0	0	0	0	1	0	0	0	0	0	0	0	0	0	0	0	0	0	0	0	0	0
Rosales	Moraceae	Artocarpus heterophyllus	Lam.	5	Not assessed	0	0	1	0	0	0	0	0	0	0	0	0	0	0	0	0	0	0	0	0	0	0	0	0	1	0	0	0	0	0	0	0	0	0	0	0	0	0	0	0	0	0	0	0
Rosales	Moraceae	Artocarpus integer	(Thunb.) Merr.	1	Not assessed	0	0	0	0	0	0	0	0	0	0	0	0	0	0	0	0	0	0	0	0	0	0	0	0	0	0	1	0	0	0	0	0	0	0	0	0	0	0	0	0	0	0	0	0
Magnoliales	Annonaceae	Asimina triloba	(L.) Dunal	1	Least concern	0	0	0	0	0	0	0	0	0	0	0	0	0	1	1	0	0	0	0	0	0	0	0	0	0	0	0	0	0	0	0	0	0	0	0	0	0	0	0	0	0	0	0	0
Fabales	Fabaceae	Aspalathus linearis	(Burm.f.) R. Dahlgren	2	Not assessed	0	0	0	0	0	0	0	0	0	0	0	0	0	0	0	0	0	0	0	0	0	0	0	0	0	0	0	0	0	0	0	0	0	0	0	0	0	0	1	0	0	0	0	0
Asparagales	Asparagaceae	Asparagus ramosissimus	Baker	1	Not assessed	0	0	0	0	0	0	0	0	0	0	0	0	0	0	0	0	0	0	0	0	0	1	0	0	0	0	0	0	0	0	0	0	0	0	0	0	0	0	1	0	0	0	0	0
Sapindales	Sapindaceae	Atalaya alata	(Sim) H.M.L.Forbes	3	Not assessed	0	0	0	0	0	0	0	0	0	0	0	0	0	0	0	0	0	0	0	0	0	1	0	0	0	0	0	0	0	0	0	0	0	0	0	0	0	0	0	0	0	0	0	0
Sapindales	Sapindaceae	Atalaya natalensis	R.A.Dyer	2	Vulnerable	0	0	0	0	0	0	0	0	0	0	0	0	0	0	0	0	0	0	0	0	0	1	0	0	0	0	0	0	0	0	0	0	0	0	0	0	0	0	0	0	0	0	0	0
Cornales	Cornaceae	Aucuba japonica	Thunb.	1	Not assessed	0	0	0	0	0	0	0	0	0	1	0	0	0	0	0	0	0	0	0	0	0	0	0	0	0	0	0	0	0	0	0	0	0	0	0	0	0	0	0	0	0	0	0	0
Cornales	Cornaceae	Aucuba japonica cv. 'Variegata'	Thunb.	1	NA	0	0	0	0	0	0	0	0	0	0	0	0	0	0	0	0	0	0	0	0	0	0	0	0	0	0	0	0	0	0	0	0	0	0	0	0	0	0	0	0	0	0	0	0
Apiales	Pittosporaceae	Auranticarpa rhombifolia	(A.Cunn. ex Hook.) L.W. Cayzer, Crisp & I. Telford	1	Least concern	0	0	0	0	0	0	0	0	0	0	0	0	0	0	0	0	0	0	0	0	0	0	0	0	0	0	0	0	0	0	0	0	0	0	0	0	0	0	0	1	0	0	0	0
Cupressales	Cupressaceae	Austrocedrus chilensis	(D.Don) Pic. Serm. & Bizzarri	1	Near threatened	0	0	0	0	0	0	0	0	0	0	0	0	0	0	0	0	0	0	0	0	0	0	0	0	0	0	0	0	0	0	0	0	0	0	0	1	0	0	0	0	0	0	0	0
Lamiales	Acanthaceae	Avicennia marina	(Forssk.) Vierh.	1	Least concern	0	0	1	0	0	0	0	0	0	0	0	0	0	0	0	0	1	0	1	0	1	1	1	0	1	1	1	0	0	0	0	0	0	0	0	0	0	0	0	1	0	0	0	0
Sapindales	Meliaceae	Azadirachta indica	A.Juss.	3	Not assessed	0	0	1	0	0	0	0	0	0	1	0	0	0	0	0	0	0	0	0	0	0	0	0	0	1	0	0	0	0	0	0	0	0	0	0	0	0	0	0	0	0	0	0	0
Malvales	Malvaceae	Azanza garckeana	(F. Hoffm.) Exell & Hillc.	4	Not assessed	0	0	0	0	0	0	0	0	0	0	0	0	0	0	0	0	0	0	0	0	1	1	0	0	0	0	0	0	0	0	0	0	0	0	0	0	0	0	0	0	0	0	0	0
Myrtales	Myrtaceae	Backhousia citriodora	F. Muell.	1	Not assessed	0	0	0	0	0	0	0	0	0	0	0	0	0	0	0	0	0	0	0	0	0	0	0	0	0	0	0	0	0	0	0	0	0	0	0	0	0	0	0	1	0	0	0	0
Zygophyllales	Zygophyllaceae	Balanites angolensis subsp. welwitschii	(Tiegh.) Sands	1	Not assessed	0	0	0	0	0	0	0	0	0	0	0	0	0	0	0	0	0	0	0	0	1	0	0	0	0	0	0	0	0	0	0	0	0	0	0	0	0	0	0	0	0	0	0	0
Zygophyllales	Zygophyllaceae	Balanites maughamii	Sprague	3	Least concern	0	0	0	0	0	0	0	0	0	0	0	0	0	0	0	0	0	0	0	0	1	1	0	0	0	0	0	0	0	0	0	0	0	0	0	0	0	0	0	0	0	0	0	0
Malpighiales	Malpighiaceae	Banisteriopsis caapi	(Spruce ex Griseb.) C.V.Morton	1	Not assessed	0	0	0	0	0	0	0	0	0	0	0	0	0	0	0	0	0	0	0	0	0	0	0	0	0	0	0	0	0	0	0	0	1	1	1	0	0	0	0	0	0	0	0	0
Proteales	Proteaceae	Banksia ericifolia	L.f.	1	Not assessed	1	0	1	0	0	0	0	0	0	0	0	0	0	0	0	0	0	0	0	0	0	0	0	0	0	0	0	0	0	0	0	0	0	0	0	0	0	0	0	1	0	0	0	0
Proteales	Proteaceae	Banksia integrifolia	L.f.	6	Not assessed	1	0	0	0	0	0	0	0	0	0	0	0	0	0	0	0	0	0	0	0	0	0	0	0	0	0	0	0	0	0	0	0	0	0	0	0	0	0	0	1	0	0	0	0
Proteales	Proteaceae	Banksia spinulosa	Sm.	2	Not assessed	0	0	0	0	0	0	0	0	0	0	0	0	0	0	0	0	0	0	0	0	0	0	0	0	0	0	0	0	0	0	0	0	0	0	0	0	0	0	0	1	0	0	0	0
Proteales	Proteaceae	Banksia spinulosa cv. 'Birthday Candles'	Sm.	1	NA	0	0	0	0	0	0	0	0	0	0	0	0	0	0	0	0	0	0	0	0	0	0	0	0	0	0	0	0	0	0	0	0	0	0	0	0	0	0	0	0	0	0	0	0
Fabales	Fabaceae	Baphia massaiensis subsp. obovata	(Schinz) Brummit	1	Not assessed	0	0	0	0	0	0	0	0	0	0	0	0	0	0	0	0	0	0	0	0	1	1	0	0	0	0	0	0	0	0	0	0	0	0	0	0	0	0	0	0	0	0	0	0
Fabales	Fabaceae	Baphia racemosa	(Hochst.) Baker	7	Not assessed	0	0	0	0	0	0	0	0	0	0	0	0	0	0	0	0	0	0	0	0	0	1	0	0	0	0	0	0	0	0	0	0	0	0	0	0	0	0	0	0	0	0	0	0
Ericales	Lecythidaceae	Barringtonia acutangula	(L.) Gaertn.	1	Not assessed	0	0	0	0	0	0	0	0	0	0	0	0	0	0	0	0	0	0	0	0	0	0	0	0	1	1	0	0	0	0	0	0	0	0	0	0	0	0	0	0	0	0	0	0
Ericales	Lecythidaceae	Barringtonia asiatica	Kurz	1	Least concern	0	0	0	0	0	0	0	0	0	0	0	0	0	0	0	0	0	0	0	0	0	0	0	0	1	1	1	0	0	0	0	0	0	0	0	0	0	0	0	0	0	0	0	0
Ericales	Lecythidaceae	Barringtonia racemosa	(L.) Spreng.	10	Not assessed	0	0	0	0	0	0	0	0	0	0	0	0	0	0	0	0	0	0	0	0	0	1	1	0	1	1	1	0	0	0	0	0	0	0	0	0	0	0	0	0	0	0	0	0
Fabales	Fabaceae	Bauhinia bowkeri	Harv.	6	Vulnerable	0	0	0	0	0	0	0	0	0	0	0	0	0	0	0	0	0	0	0	0	0	1	0	0	0	0	0	0	0	0	0	0	0	0	0	0	0	0	0	0	0	0	0	0
Fabales	Fabaceae	Bauhinia forficata	Link	2	Least concern	1	0	0	0	0	0	0	0	0	0	0	0	0	0	0	0	0	0	0	0	0	0	0	0	0	0	0	0	0	0	0	0	0	1	1	0	1	0	0	0	0	0	0	0
Fabales	Fabaceae	Bauhinia forficata subsp. pruinosa	(Vogel) Fortunato & Wunderlin	1	Least concern	0	0	0	0	0	0	0	0	0	0	0	0	0	0	0	0	0	0	0	0	0	0	0	0	0	0	0	0	0	0	0	0	0	0	1	0	1	0	0	0	0	0	0	0
Fabales	Fabaceae	Bauhinia galpinii	N.E.Br.	17	Not assessed	0	0	0	0	1	0	0	0	0	0	0	0	0	0	0	0	0	0	0	0	0	1	0	0	0	0	0	0	0	0	0	0	0	0	0	0	0	0	0	0	0	0	0	0
Fabales	Fabaceae	Bauhinia hookeri	F.Muell.	2	Not assessed	0	0	0	0	0	0	0	0	0	0	0	0	0	0	0	0	0	0	0	0	0	0	0	0	0	0	0	0	0	0	0	0	0	0	0	0	0	0	0	1	0	0	0	0
Fabales	Fabaceae	Bauhinia monandra	Kurz	1	Not assessed	0	0	1	0	0	0	0	0	0	0	0	0	0	0	0	0	0	0	0	0	0	0	1	0	0	0	0	0	0	0	0	0	0	0	0	0	0	0	0	0	0	0	0	0
Fabales	Fabaceae	Bauhinia natalensis	Oliv. ex Hook.	7	Not assessed	0	0	0	0	0	0	0	0	0	0	0	0	0	0	0	0	0	0	0	0	0	1	0	0	0	0	0	0	0	0	0	0	0	0	0	0	0	0	0	0	0	0	0	0
Fabales	Fabaceae	Bauhinia petersiana	Bolle	3	Not assessed	0	0	0	0	0	0	0	0	0	1	0	0	0	0	0	0	0	0	0	0	0	0	0	0	1	1	0	0	0	0	0	0	0	0	0	0	0	0	0	0	0	0	0	0
Fabales	Fabaceae	Bauhinia purpurea	L.	2	Least concern	1	0	1	0	1	0	0	0	0	1	0	0	0	0	0	0	0	0	0	0	0	0	0	0	1	1	0	0	0	0	0	0	0	0	0	0	0	0	0	0	0	0	0	0
Fabales	Fabaceae	Bauhinia tomentosa	L.	11	Not assessed	0	0	0	0	0	0	0	0	0	0	0	0	0	0	0	0	0	0	0	0	1	1	0	0	1	0	0	0	0	0	0	0	0	0	0	0	0	0	0	0	0	0	0	0
Fabales	Fabaceae	Bauhinia vahlii	Wight & Arn.	1	Not assessed	0	0	0	0	0	0	0	0	0	0	0	0	0	0	0	0	0	0	0	0	0	0	0	0	1	0	0	0	0	0	0	0	0	0	0	0	0	0	0	0	0	0	0	0
Fabales	Fabaceae	Bauhinia variegata	L.	7	Least concern	1	0	1	0	0	0	0	0	0	0	0	0	0	0	0	0	0	0	0	0	0	0	0	0	1	1	0	0	0	0	0	0	0	0	0	0	0	0	0	0	0	0	0	0
Fabales	Fabaceae	Bauhinia variegata cv. 'Candida'	L.	3	NA	0	0	0	0	0	0	0	0	0	0	0	0	0	0	0	0	0	0	0	0	0	0	0	0	0	0	0	0	0	0	0	0	0	0	0	0	0	0	0	0	0	0	0	0
Fabales	Fabaceae	Bauhinia variegata cv. 'Rubra'	L.	1	NA	0	0	0	0	0	0	0	0	0	0	0	0	0	0	0	0	0	0	0	0	0	0	0	0	0	0	0	0	0	0	0	0	0	0	0	0	0	0	0	0	0	0	0	0
Fabales	Fabaceae	Bauhinia x blakeana	Dunn	3	NA	0	0	0	0	1	0	0	0	0	0	0	0	0	0	0	0	0	0	0	0	0	0	0	0	0	0	0	0	0	0	0	0	0	0	0	0	0	0	0	0	0	0	0	0
Asparagales	Asparagaceae	Beaucarnea recurvata	(K.Koch & Fintelm.) Lem.	9	Not assessed	0	0	0	0	0	0	0	0	0	0	0	0	0	0	0	0	0	0	0	0	0	0	0	0	0	0	0	0	0	0	0	1	0	0	0	0	0	0	0	0	0	0	0	0
Asparagales	Asparagaceae	Beaucarnea stricta	Lem.	1	Vulnerable	0	0	0	0	0	0	0	0	0	0	0	0	0	0	0	0	0	0	0	0	0	0	0	0	0	0	0	0	0	0	0	1	0	0	0	0	0	0	0	0	0	0	0	0
Gentianales	Apocynaceae	Beaumontia grandiflora	(Roxb.) Wall.	1	Not assessed	0	0	0	0	0	0	0	0	0	1	0	0	0	0	0	0	0	0	0	0	0	0	0	0	1	1	0	0	0	0	0	0	0	0	0	0	0	0	0	0	0	0	0	0
Laurales	Lauraceae	Beilschmiedia miersii	(Gay) Kosterm.	1	Not assessed	0	0	0	0	0	0	0	0	0	0	0	0	0	0	0	0	0	0	0	0	0	0	0	0	0	0	0	0	0	0	0	0	0	0	0	1	0	0	0	0	0	0	0	0
Ranunculales	Berberidaceae	Berberis aquifolium	Pursh	1	Not assessed	0	0	0	0	0	0	0	0	0	0	0	0	0	0	0	1	0	0	0	0	0	0	0	0	0	0	0	0	0	0	0	0	0	0	0	0	0	0	0	0	0	0	0	0
Ranunculales	Berberidaceae	Berberis julianae	C.K. Schneid.	3	Not assessed	1	0	1	0	0	0	0	0	0	1	0	0	0	0	0	0	0	0	0	0	0	0	0	0	0	0	0	0	0	0	0	0	0	0	0	0	0	0	0	0	0	0	0	0
Ranunculales	Berberidaceae	Berberis sargentiana	C.K.Schneid.	1	Not assessed	0	0	0	0	0	0	0	0	0	1	0	0	0	0	0	0	0	0	0	0	0	0	0	0	0	0	0	0	0	0	0	0	0	0	0	0	0	0	0	0	0	0	0	0
Ranunculales	Berberidaceae	Berberis thunbergii	DC.	3	Not assessed	0	1	1	1	0	0	0	0	0	1	0	0	0	0	0	0	0	0	0	0	0	0	0	0	0	0	0	0	0	0	0	0	0	0	0	0	0	0	0	0	0	0	0	0
Ranunculales	Berberidaceae	Berberis thunbergii cv. 'Atropurpurea'	Chenault	3	NA	0	0	0	0	0	0	0	0	0	0	0	0	0	0	0	0	0	0	0	0	0	0	0	0	0	0	0	0	0	0	0	0	0	0	0	0	0	0	0	0	0	0	0	0
Rosales	Rhamnaceae	Berchemia discolor	(Klotzsch) Hemsl.	6	Least concern	0	0	0	0	0	0	0	0	0	0	0	0	0	0	0	0	1	1	1	0	1	1	0	0	0	0	0	0	0	0	0	0	0	0	0	0	0	0	0	0	0	0	0	0
Rosales	Rhamnaceae	Berchemia zeyheri	(Sond.) Grubov	8	Not assessed	0	0	0	0	0	0	0	0	0	0	0	0	0	0	0	0	0	0	0	0	0	1	0	0	0	0	0	0	0	0	0	0	0	0	0	0	0	0	0	0	0	0	0	0
Geraniales	Francoaceae	Bersama abyssinica	Fresen.	2	Not assessed	0	0	0	0	0	0	0	0	0	0	0	0	0	0	0	0	0	1	1	1	1	0	0	0	0	0	0	0	0	0	0	0	0	0	0	0	0	0	0	0	0	0	0	0
Geraniales	Francoaceae	Bersama lucens	(Hochst.) Szyszyl.	6	Not assessed	0	0	0	0	0	0	0	0	0	0	0	0	0	0	0	0	0	0	0	0	0	1	0	0	0	0	0	0	0	0	0	0	0	0	0	0	0	0	0	0	0	0	0	0
Geraniales	Francoaceae	Bersama swinnyi	E.Phillips	3	Not assessed	0	0	0	0	0	0	0	0	0	0	0	0	0	0	0	0	0	0	0	0	0	1	0	0	0	0	0	0	0	0	0	0	0	0	0	0	0	0	0	0	0	0	0	0
Geraniales	Francoaceae	Bersama tysoniana	Oliv.	1	Not assessed	0	0	0	0	0	0	0	0	0	0	0	0	0	0	0	0	0	0	0	0	0	1	0	0	0	0	0	0	0	0	0	0	0	0	0	0	0	0	0	0	0	0	0	0
Fagales	Betulaceae	Betula pendula	Roth	9	Least concern	0	0	1	0	0	0	0	1	0	0	0	1	0	0	0	0	0	0	0	0	0	0	0	0	0	0	0	0	0	0	0	0	0	0	0	0	0	0	0	0	0	0	0	0
Fagales	Betulaceae	Betula pendula cv. 'Purpurea'	Roth	1	NA	0	0	0	0	0	0	0	0	0	0	0	0	0	0	0	0	0	0	0	0	0	0	0	0	0	0	0	0	0	0	0	0	0	0	0	0	0	0	0	0	0	0	0	0
Fagales	Betulaceae	Betula pubescens	Ehrh.	3	Least concern	0	0	0	0	0	0	0	0	0	0	0	0	0	1	0	0	0	0	0	0	0	0	0	0	0	0	0	0	0	0	0	0	0	0	0	0	0	0	0	0	0	0	0	0
Malpighiales	Phyllanthaceae	Bischofia javanica	Blume	2	Not assessed	0	1	1	0	1	0	0	0	0	1	0	0	0	0	0	0	0	0	0	0	0	0	0	0	0	1	1	0	0	0	0	0	0	0	0	0	0	0	0	1	0	0	0	0
Arecales	Arecaceae	Bismarckia nobilis	Hildebrandt & H.Wendl.	1	Least concern	0	0	0	0	0	0	0	0	0	0	0	0	0	0	0	0	0	0	0	0	0	0	1	0	0	0	0	0	0	0	0	0	0	0	0	0	0	0	0	0	0	0	0	0
Malvales	Bixaceae	Bixa orellana	L.	4	Not assessed	0	0	0	0	0	0	0	0	0	0	0	0	0	0	0	0	0	0	0	0	0	0	0	0	0	0	0	0	0	0	0	1	1	1	0	0	0	0	0	0	0	0	0	0
Sapindales	Sapindaceae	Blighia unijugata	Baker	2	Least concern	0	0	0	0	0	0	0	0	0	0	0	0	0	0	0	0	0	0	0	1	1	1	0	0	0	0	0	0	0	0	0	0	0	0	0	0	0	0	0	0	0	0	0	0
Fabales	Fabaceae	Bolusanthus speciosus	(Bolus) Harms	19	Not assessed	0	0	0	0	0	0	0	0	0	0	0	0	0	0	0	0	0	0	0	0	1	1	0	0	0	0	0	0	0	0	0	0	0	0	0	0	0	0	0	0	0	0	0	0
Malvales	Malvaceae	Bombax ceiba	DC.	1	Not assessed	0	0	0	0	1	0	0	0	0	1	0	0	0	0	0	0	0	0	0	0	0	0	0	0	1	1	1	0	0	0	0	0	0	0	0	0	0	0	0	0	0	0	0	0
Ericales	Primulaceae	Bonellia macrocarpa	(Cav.) B.Ståhl & Källersjö	1	Least concern	0	0	0	0	0	0	0	0	0	0	0	0	0	0	0	0	0	0	0	0	0	0	0	0	0	0	0	0	0	0	0	1	0	0	0	0	0	0	0	0	0	0	0	0
Lamiales	Scrophulariaceae	Bontia daphnoides	L.	1	Not assessed	0	0	0	0	0	0	0	0	0	0	0	0	0	0	0	0	0	0	0	0	0	0	0	0	0	0	0	0	0	0	0	1	0	0	0	0	0	0	0	0	0	0	0	0
Arecales	Arecaceae	Borassus aethiopum	Mart.	2	Least concern	0	0	0	0	0	0	0	0	0	0	0	0	0	0	0	0	0	1	1	1	1	1	0	0	0	0	0	0	0	0	0	0	0	0	0	0	0	0	0	0	0	0	0	0
Brassicales	Capparaceae	Boscia albitrunca	(Burch.) Gilg & Gilg-Ben.	2	Least concern	0	0	0	0	0	0	0	0	0	0	0	0	0	0	0	0	0	0	0	0	1	1	0	0	0	0	0	0	0	0	0	0	0	0	0	0	0	0	0	0	0	0	0	0
Brassicales	Capparaceae	Boscia matabelensis	Pestal.	1	Not assessed	0	0	0	0	0	0	0	0	0	0	0	0	0	0	0	0	0	0	0	0	1	0	0	0	0	0	0	0	0	0	0	0	0	0	0	0	0	0	0	0	0	0	0	0
Caryophyllales	Nyctaginaceae	Bougainvillea glabra	Choisy	3	Least concern	1	0	0	0	0	0	0	0	0	0	0	0	0	0	0	0	0	0	0	0	0	0	0	0	0	0	0	0	0	0	0	0	0	0	1	0	0	0	0	0	0	0	0	0
Caryophyllales	Nyctaginaceae	Bougainvillea glabra cv. 'Variegata'	Choisy	1	NA	0	0	0	0	0	0	0	0	0	0	0	0	0	0	0	0	0	0	0	0	0	0	0	0	0	0	0	0	0	0	0	0	0	0	0	0	0	0	0	0	0	0	0	0
Caryophyllales	Nyctaginaceae	Bougainvillea peruviana	Humb. & Bonpl.	1	Not assessed	0	0	0	0	0	0	0	0	0	0	0	0	0	0	0	0	0	0	0	0	0	0	0	0	0	0	0	0	0	0	0	1	0	0	0	0	0	0	0	0	0	0	0	0
Caryophyllales	Nyctaginaceae	Bougainvillea spectabilis	Willd.	3	Not assessed	0	0	1	0	0	0	0	0	0	0	0	0	0	0	0	0	0	0	0	0	0	0	0	0	0	0	0	0	0	0	0	0	0	0	1	0	0	0	0	0	0	0	0	0
Caryophyllales	Nyctaginaceae	Bougainvillea x buttiana	Holtum ex Standl.	2	NA	0	0	0	0	0	0	0	0	0	0	0	0	0	0	0	0	0	0	0	0	0	0	0	0	0	0	0	0	0	0	0	0	0	0	0	0	0	0	0	0	0	0	0	0
Lamiales	Stilbaceae	Bowkeria citrina	Thode	3	Not assessed	0	0	0	0	0	0	0	0	0	0	0	0	0	0	0	0	0	0	0	0	0	1	0	0	0	0	0	0	0	0	0	0	0	0	0	0	0	0	0	0	0	0	0	0
Lamiales	Stilbaceae	Bowkeria cymosa	MacOwan	4	Not assessed	0	0	0	0	0	0	0	0	0	0	0	0	0	0	0	0	0	0	0	0	0	1	0	0	0	0	0	0	0	0	0	0	0	0	0	0	0	0	0	0	0	0	0	0
Lamiales	Stilbaceae	Bowkeria verticillata	(Eckl. & Zeyh.) Schinz	4	Not assessed	0	0	0	0	0	0	0	0	0	0	0	0	0	0	0	0	0	0	0	0	0	1	0	0	0	0	0	0	0	0	0	0	0	0	0	0	0	0	0	0	0	0	0	0
Proteales	Proteaceae	Brabejum stellatifolium	L.	7	Not assessed	0	0	0	0	0	0	0	0	0	0	0	0	0	0	0	0	0	0	0	0	0	0	0	0	0	0	0	0	0	0	0	0	0	0	0	0	0	0	1	0	0	0	0	0
Malvales	Malvaceae	Brachychiton acerifolius	(A.Cunn.) F.Muell.	18	Not assessed	0	0	0	0	1	0	0	0	0	0	0	0	0	0	0	0	0	0	0	0	0	0	0	0	0	0	0	0	0	0	0	0	0	0	0	0	0	0	0	1	0	0	0	0
Malvales	Malvaceae	Brachychiton australis	(Schott & Endl.) A. Terracc.	1	Least concern	0	0	0	0	1	0	0	0	0	0	0	0	0	0	0	0	0	0	0	0	0	0	0	0	0	0	0	0	0	0	0	0	0	0	0	0	0	0	0	1	0	0	0	0
Malvales	Malvaceae	Brachychiton bidwillii	Hook.	1	Least concern	0	0	0	0	0	0	0	0	0	0	0	0	0	0	0	0	0	0	0	0	0	0	0	0	0	0	0	0	0	0	0	0	0	0	0	0	0	0	0	1	0	0	0	0
Malvales	Malvaceae	Brachychiton discolor	F.Muell.	11	Not assessed	0	0	0	0	0	0	0	0	0	0	0	0	0	0	0	0	0	0	0	0	0	0	0	0	0	0	0	0	0	0	0	0	0	0	0	0	0	0	0	1	0	0	0	0
Malvales	Malvaceae	Brachychiton diversifolius	R.Br.	1	Not assessed	0	0	0	0	0	0	0	0	0	0	0	0	0	0	0	0	0	0	0	0	0	0	0	0	0	0	0	0	0	0	0	0	0	0	0	0	0	0	0	1	0	0	0	0
Malvales	Malvaceae	Brachychiton populneus	(Schott. & Endl.) R.Br.	15	Not assessed	1	0	1	0	0	0	0	0	0	0	0	0	0	0	0	0	0	0	0	0	0	0	0	0	0	0	0	0	0	0	0	0	0	0	0	0	0	0	0	1	0	0	0	0
Malvales	Malvaceae	Brachychiton rupestris	(Lindl.) K.Schum.	2	Not assessed	0	0	0	0	1	0	0	0	0	0	0	0	0	0	0	0	0	0	0	0	0	0	0	0	0	0	0	0	0	0	0	0	0	0	0	0	0	0	0	1	0	0	0	0
Asterales	Asteraceae	Brachylaena discolor	DC.	16	Not assessed	0	0	0	0	1	1	0	0	0	0	0	0	0	0	0	0	0	0	0	0	0	1	0	0	0	0	0	0	0	0	0	0	0	0	0	0	0	0	0	0	0	0	0	0
Asterales	Asteraceae	Brachylaena elliptica	Less.	3	Not assessed	0	0	0	0	0	0	0	0	0	0	0	0	0	0	0	0	0	0	0	0	0	1	0	0	0	0	0	0	0	0	0	0	0	0	0	0	0	0	0	0	0	0	0	0
Asterales	Asteraceae	Brachylaena huillensis	O.Hoffm.	2	Near threatened	0	0	0	0	0	0	0	0	0	0	0	0	0	0	0	0	0	0	0	0	0	1	0	0	0	0	0	0	0	0	0	0	0	0	0	0	0	0	0	0	0	0	0	0
Asterales	Asteraceae	Brachylaena ilicifolia	(Lam.) E. Phillips & Schweick.	1	Least concern	0	0	0	0	0	0	0	0	0	0	0	0	0	0	0	0	0	0	0	0	0	1	0	0	0	0	0	0	0	0	0	0	0	0	0	0	0	0	0	0	0	0	0	0
Asterales	Asteraceae	Brachylaena neriifolia	R.Br.	7	Not assessed	0	0	0	0	0	0	0	0	0	0	0	0	0	0	0	0	0	0	0	0	0	0	0	0	0	0	0	0	0	0	0	0	0	0	0	0	0	0	1	0	0	0	0	0
Asterales	Asteraceae	Brachylaena rotundata	S.Moore	8	Not assessed	0	0	0	0	0	0	0	0	0	0	0	0	0	0	0	0	0	0	0	0	1	1	0	0	0	0	0	0	0	0	0	0	0	0	0	0	0	0	0	0	0	0	0	0
Asterales	Asteraceae	Brachylaena transvaalensis	E. Phillips & Schweick.	1	Not assessed	0	0	0	0	0	0	0	0	0	0	0	0	0	0	0	0	0	0	0	0	0	1	0	0	0	0	0	0	0	0	0	0	0	0	0	0	0	0	0	0	0	0	0	0
Asterales	Asteraceae	Brachylaena uniflora	Harv.	1	Not assessed	0	0	0	0	0	0	0	0	0	0	0	0	0	0	0	0	0	0	0	0	0	1	0	0	0	0	0	0	0	0	0	0	0	0	0	0	0	0	0	0	0	0	0	0
Fabales	Fabaceae	Brachystegia boehmii	Taub.	1	Least concern	0	0	0	0	0	0	0	0	0	0	0	0	0	0	0	0	0	0	0	1	1	0	0	0	0	0	0	0	0	0	0	0	0	0	0	0	0	0	0	0	0	0	0	0
Fabales	Fabaceae	Brachystegia spiciformis	Benth.	1	Least concern	0	0	0	0	0	0	0	0	0	0	0	0	0	0	0	0	0	0	0	1	1	1	0	0	0	0	0	0	0	0	0	0	0	0	0	0	0	0	0	0	0	0	0	0
Arecales	Arecaceae	Brahea armata	S.Watson	1	Least concern	0	0	0	0	0	0	0	0	0	0	0	0	0	0	0	1	0	0	0	0	0	0	0	0	0	0	0	0	0	0	0	0	0	0	0	0	0	0	0	0	0	0	0	0
Geraniales	Rubiaceae	Breonadia salicina	(Vahl) Hepper & J.R.I. Wood	3	Not assessed	0	0	0	0	0	0	0	0	0	0	0	0	0	0	0	0	0	0	1	0	1	1	1	0	0	0	0	0	0	0	0	0	0	0	0	0	0	0	0	0	0	0	0	0
Saxifragales	Saxifragaceae	Brexia madagascariensis	(Lam.) Thouars ex Ker Gawl.	1	Vulnerable	0	0	0	0	0	0	0	0	0	0	0	0	0	0	0	0	0	0	0	0	0	0	1	0	0	0	0	0	0	0	0	0	0	0	0	0	0	0	0	0	0	0	0	0
Malpighiales	Phyllanthaceae	Breynia disticha cv. 'Rosea'	J.R.Forst. & G.Forst.	1	NA	0	0	0	0	0	0	0	0	0	0	0	0	0	0	0	0	0	0	0	0	0	0	0	0	0	0	0	0	0	0	0	0	0	0	0	0	0	0	0	0	0	0	0	0
Malpighiales	Euphorbiaceae	Bridelia cathartica	G.Bertol.	1	Least concern	0	0	0	0	0	0	0	0	0	0	0	0	0	0	0	0	0	0	0	0	0	1	0	0	0	0	0	0	0	0	0	0	0	0	0	0	0	0	0	0	0	0	0	0
Malpighiales	Euphorbiaceae	Bridelia micrantha	(Hochst.) Baill.	17	Not assessed	0	0	0	0	0	0	0	0	0	0	0	0	0	0	0	0	0	1	0	0	1	1	0	0	0	0	0	0	0	0	0	0	0	0	0	0	0	0	0	0	0	0	0	0
Malpighiales	Euphorbiaceae	Bridelia mollis	Hutch.	1	Least concern	0	0	0	0	0	0	0	0	0	0	0	0	0	0	0	0	0	0	0	0	1	0	0	0	0	0	0	0	0	0	0	0	0	0	0	0	0	0	0	0	0	0	0	0
Rosales	Moraceae	Broussonetia papyrifera	(L.) Vent.	1	Least concern	0	0	1	0	1	0	0	0	0	1	0	0	0	0	0	0	0	0	0	0	0	0	0	0	0	1	1	0	0	1	1	0	0	0	0	0	0	0	0	0	0	0	0	0
Fabales	Fabaceae	Brownea grandiceps	Jacq.	2	Not assessed	0	0	0	0	0	0	0	0	0	0	0	0	0	0	0	0	0	0	0	0	0	0	0	0	0	0	0	0	0	0	0	0	1	1	0	1	0	0	0	0	0	0	0	0
Fabales	Fabaceae	Brownea macrophylla	Linden ex Mast.	1	Not assessed	0	0	0	0	0	0	0	0	0	0	0	0	0	0	0	0	0	0	0	0	0	0	0	0	0	0	0	0	0	0	0	1	1	0	0	0	0	0	0	0	0	0	0	0
Solanales	Solanaceae	Brugmansia cv. H14851 'Variegated'	NA	1	NA	0	0	0	0	0	0	0	0	0	0	0	0	0	0	0	0	0	0	0	0	0	0	0	0	0	0	0	0	0	0	0	0	0	0	0	0	0	0	0	0	0	0	0	0
Solanales	Solanaceae	Brugmansia suaveolens	(Willd.) Bercht. & J.Presl	1	Extinct in the wild	1	0	1	0	0	0	0	0	0	0	0	0	0	0	0	0	0	0	0	0	0	0	0	0	0	0	0	0	0	0	0	0	1	1	1	0	0	0	0	0	0	0	0	0
Solanales	Solanaceae	Brunfelsia pauciflora	(Cham. & Schltdl.) Benth.	5	Not assessed	0	0	0	0	0	0	0	0	0	0	0	0	0	0	0	0	0	0	0	0	0	0	0	0	0	0	0	0	0	0	0	0	0	0	1	0	0	0	0	0	0	0	0	0
Solanales	Solanaceae	Brunfelsia pauciflora cv. 'Eximia'	Benth.	1	NA	0	0	0	0	0	0	0	0	0	0	0	0	0	0	0	0	0	0	0	0	0	0	0	0	0	0	0	0	0	0	0	0	0	0	0	0	0	0	0	0	0	0	0	0
Proteales	Proteaceae	Buckinghamia celsissima	F. Muell.	2	Not assessed	0	0	0	0	0	0	0	0	0	0	0	0	0	0	0	0	0	0	0	0	0	0	0	0	0	0	0	0	0	0	0	0	0	0	0	0	0	0	0	1	0	0	0	0
Lamiales	Scrophulariaceae	Buddleja alternifolia	Maxim.	1	Least concern	0	0	0	0	0	0	0	0	0	1	0	0	0	0	0	0	0	0	0	0	0	0	0	0	0	0	0	0	0	0	0	0	0	0	0	0	0	0	0	0	0	0	0	0
Lamiales	Scrophulariaceae	Buddleja auriculata	Benth.	8	Not assessed	0	0	0	0	0	0	0	0	0	0	0	0	0	0	0	0	0	0	0	0	0	1	0	0	0	0	0	0	0	0	0	0	0	0	0	0	0	0	0	0	0	0	0	0
Lamiales	Scrophulariaceae	Buddleja dysophylla	(Benth.) Radlk.	1	Not assessed	0	0	0	0	0	0	0	0	0	0	0	0	0	0	0	0	0	0	0	0	1	1	0	0	0	0	0	0	0	0	0	0	0	0	0	0	0	0	0	0	0	0	0	0
Lamiales	Scrophulariaceae	Buddleja glomerata	H.L. Wendl.	2	Not assessed	0	0	0	0	0	0	0	0	0	0	0	0	0	0	0	0	0	0	0	0	0	1	0	0	0	0	0	0	0	0	0	0	0	0	0	0	0	0	0	0	0	0	0	0
Lamiales	Scrophulariaceae	Buddleja loricata	Leeuwenb.	2	Not assessed	0	0	0	0	0	0	0	0	0	0	0	0	0	0	0	0	0	0	0	0	0	1	0	0	0	0	0	0	0	0	0	0	0	0	0	0	0	0	0	0	0	0	0	0
Lamiales	Scrophulariaceae	Buddleja saligna	Willd.	15	Not assessed	0	0	0	0	1	0	0	0	0	0	0	0	0	0	0	0	0	0	0	0	0	1	0	0	0	0	0	0	0	0	0	0	0	0	0	0	0	0	0	0	0	0	0	0
Lamiales	Scrophulariaceae	Buddleja salviifolia	(L.) Lam.	16	Least concern	0	0	0	0	0	0	0	0	0	0	0	0	0	0	0	0	0	0	0	0	1	1	0	0	0	0	0	0	0	0	0	0	0	0	0	0	0	0	0	0	0	0	0	0
Lamiales	Scrophulariaceae	Buddleja thyrsoides	Lam.	1	Not assessed	0	0	0	0	0	0	0	0	0	0	0	0	0	0	0	0	0	0	0	0	0	0	0	0	0	0	0	0	0	0	0	0	0	0	0	0	1	0	0	0	0	0	0	0
Gentianales	Rubiaceae	Burchellia bubalina	(L.f.) Sims	15	Not assessed	0	0	0	0	0	0	0	0	0	0	0	0	0	0	0	0	0	0	0	0	0	1	0	0	0	0	0	0	0	0	0	0	0	0	0	0	0	0	0	0	0	0	0	0
Fabales	Fabaceae	Burkea africana	Hook.	3	Least concern	0	0	0	0	0	0	0	0	0	0	0	0	0	0	0	0	0	0	0	1	1	1	0	0	0	0	0	0	0	0	0	0	0	0	0	0	0	0	0	0	0	0	0	0
Sapindales	Burseraceae	Bursera fagaroides	(Kunth) Engl.	1	Least concern	0	0	0	0	0	0	0	0	0	0	0	0	0	0	0	1	0	0	0	0	0	0	0	0	0	0	0	0	0	0	0	0	0	0	0	0	0	0	0	0	0	0	0	0
Gentianales	Rubiaceae	Burttdavya nyasica	Hoyle	1	Not assessed	0	0	0	0	0	0	0	0	0	0	0	0	0	0	0	0	0	0	0	0	1	0	0	0	0	0	0	0	0	0	0	0	0	0	0	0	0	0	0	0	0	0	0	0
Fabales	Fabaceae	Butea monosperma	(Lam.) Taub.	1	Not assessed	0	0	0	0	0	0	0	0	0	1	0	0	0	0	0	0	0	0	0	0	0	0	0	0	0	1	0	0	0	0	0	0	0	0	0	0	0	0	0	0	0	0	0	0
Fabales	Fabaceae	Butea superba	Roxb.	1	Not assessed	0	0	0	0	0	0	0	0	0	0	0	0	0	0	0	0	0	0	0	0	0	0	0	0	1	1	0	0	0	0	0	0	0	0	0	0	0	0	0	0	0	0	0	0
Arecales	Arecaceae	Butia capitata	(Mart.) Becc.	11	Not assessed	0	0	0	0	1	0	0	0	0	0	0	0	0	0	0	0	0	0	0	0	0	0	0	0	0	0	0	0	0	0	0	0	0	0	1	0	0	0	0	0	0	0	0	0
Arecales	Arecaceae	Butia eriospatha	(Mart. ex Drude) Becc.	1	Not assessed	0	0	0	0	0	0	0	0	0	0	0	0	0	0	0	0	0	0	0	0	0	0	0	0	0	0	0	0	0	0	0	0	0	0	1	0	0	0	0	0	0	0	0	0
Arecales	Arecaceae	Butia yatay	(Mart.) Becc.	1	Not assessed	0	0	0	0	0	0	0	0	0	0	0	0	0	0	0	0	0	0	0	0	0	0	0	0	0	0	0	0	0	0	0	0	0	0	0	0	1	0	0	0	0	0	0	0
Buxales	Buxaceae	Buxus macowanii	Oliv.	5	Not assessed	0	0	0	0	0	0	0	0	0	0	0	0	0	0	0	0	0	0	0	0	0	1	0	0	0	0	0	0	0	0	0	0	0	0	0	0	0	0	0	0	0	0	0	0
Buxales	Buxaceae	Buxus natalensis	(Oliv.) Hutch.	3	Not assessed	0	0	0	0	0	0	0	0	0	0	0	0	0	0	0	0	0	0	0	0	0	1	0	0	0	0	0	0	0	0	0	0	0	0	0	0	0	0	0	0	0	0	0	0
Buxales	Buxaceae	Buxus sempervirens	L.	5	Not assessed	0	0	0	0	0	0	0	1	0	0	0	1	0	0	0	0	0	0	0	0	0	0	0	0	0	0	0	0	0	0	0	0	0	0	0	0	0	0	0	0	0	0	0	0
Buxales	Buxaceae	Buxus sempervirens cv. 'Myosotidifolia'	L.	1	NA	0	0	0	0	0	0	0	0	0	0	0	0	0	0	0	0	0	0	0	0	0	0	0	0	0	0	0	0	0	0	0	0	0	0	0	0	0	0	0	0	0	0	0	0
Fabales	Fabaceae	Cadia purpurea	(G.Piccioli) Aiton	1	Least concern	0	0	0	0	0	0	0	0	0	0	0	0	0	0	0	0	1	0	1	0	0	0	0	0	0	0	0	0	0	0	0	0	0	0	0	0	0	0	0	0	0	0	0	0
Fabales	Fabaceae	Caesalpinia bonduc	(L.) Roxb.	1	Not assessed	0	0	0	0	0	0	0	0	0	0	0	0	0	0	0	0	0	0	0	0	0	1	0	0	0	0	0	0	0	0	0	0	0	0	0	0	0	0	0	0	0	0	0	0
Fabales	Fabaceae	Caesalpinia ferrea	Tul.	12	Not assessed	0	0	0	0	0	0	0	0	0	0	0	0	0	0	0	0	0	0	0	0	0	0	0	0	0	0	0	0	0	0	0	0	0	0	1	0	0	0	0	0	0	0	0	0
Fabales	Fabaceae	Caesalpinia gilliesii	(Hook.) D.Dietr.	2	Not assessed	1	0	1	0	0	0	0	0	0	0	0	0	0	0	0	0	0	0	0	0	0	0	0	0	0	0	0	0	0	0	0	0	0	0	0	0	1	0	0	0	0	0	0	0
Fabales	Fabaceae	Caesalpinia pulcherrima	(L.) Sw.	2	Not assessed	1	0	1	0	0	0	0	0	0	0	0	0	0	0	0	0	0	0	0	0	0	0	0	0	0	0	0	0	0	0	0	1	0	0	0	0	0	0	0	0	0	0	0	0
Fabales	Fabaceae	Calliandra brevipes	Benth.	2	Not assessed	0	0	0	0	0	0	0	0	0	0	0	0	0	0	0	0	0	0	0	0	0	0	0	0	0	0	0	0	0	0	0	0	0	0	1	0	0	0	0	0	0	0	0	0
Fabales	Fabaceae	Calliandra haematocephala	Hassk.	1	Not assessed	0	0	0	0	0	0	0	0	0	0	0	0	0	0	0	0	0	0	0	0	0	0	0	0	0	0	0	0	0	0	0	1	0	0	0	0	0	0	0	0	0	0	0	0
Fabales	Fabaceae	Calliandra haematocephala cv. 'Alba'	Hassk.	1	NA	0	0	0	0	0	0	0	0	0	0	0	0	0	0	0	0	0	0	0	0	0	0	0	0	0	0	0	0	0	0	0	0	0	0	0	0	0	0	0	0	0	0	0	0
Fabales	Fabaceae	Calliandra selloi	(Spreng.) J.F. Macbr.	2	Not assessed	0	0	0	0	0	0	0	0	0	0	0	0	0	0	0	0	0	0	0	0	0	0	0	0	0	0	0	0	0	0	0	0	0	0	1	0	0	0	0	0	0	0	0	0
Fabales	Fabaceae	Calliandra surinamensis	Benth.	2	Not assessed	0	0	0	0	0	0	0	0	0	0	0	0	0	0	0	0	0	0	0	0	0	0	0	0	0	0	0	0	0	0	0	0	1	1	0	0	0	0	0	0	0	0	0	0
Lamiales	Lamiaceae	Callicarpa dichotoma	(Lour.) K.Koch	1	Not assessed	0	0	0	0	0	0	0	0	0	1	0	0	0	0	0	0	0	0	0	0	0	0	0	0	0	0	0	0	0	0	0	0	0	0	0	0	0	0	0	0	0	0	0	0
Myrtales	Myrtaceae	Callistemon citrinus	(Curtis) Stapf	9	Not assessed	1	0	1	0	0	0	0	0	0	0	0	0	0	0	0	0	0	0	0	0	0	0	0	0	0	0	0	0	0	0	0	0	0	0	0	0	0	0	0	1	0	0	0	0
Myrtales	Myrtaceae	Callistemon salignus	(SM.) Sweet	2	Not assessed	1	0	0	0	0	0	0	0	0	0	0	0	0	0	0	0	0	0	0	0	0	0	0	0	0	0	0	0	0	0	0	0	0	0	0	0	0	0	0	1	0	0	0	0
Myrtales	Myrtaceae	Callistemon sieberi	DC.	2	Not assessed	0	0	0	0	0	0	0	0	0	0	0	0	0	0	0	0	0	0	0	0	0	0	0	0	0	0	0	0	0	0	0	0	0	0	0	0	0	0	0	1	0	0	0	0
Myrtales	Myrtaceae	Callistemon viminalis	(Sol. ex Gaertn.) Cheel	14	Not assessed	1	0	1	0	1	0	0	0	0	0	0	0	0	0	0	0	0	0	0	0	0	0	0	0	0	0	0	0	0	0	0	0	0	0	0	0	0	0	0	1	0	0	0	0
Myrtales	Myrtaceae	Callistemon viminalis cv. 'Endeavor'	(Sol. ex Gaertn.) Cheel	1	NA	0	0	0	0	0	0	0	0	0	0	0	0	0	0	0	0	0	0	0	0	0	0	0	0	0	0	0	0	0	0	0	0	0	0	0	0	0	0	0	0	0	0	0	0
Cupressales	Cupressaceae	Callitris columellaris	F. Muell.	4	Least concern	0	0	0	0	0	0	0	0	0	0	0	0	0	0	0	0	0	0	0	0	0	0	0	0	0	0	0	0	0	0	0	0	0	0	0	0	0	0	0	0	1	1	0	0
Cupressales	Cupressaceae	Callitris endlicheri	(Parl.) F.M. Bailey	1	Least concern	0	0	0	0	0	0	0	0	0	0	0	0	0	0	0	0	0	0	0	0	0	0	0	0	0	0	0	0	0	0	0	0	0	0	0	0	0	0	0	1	0	0	0	0
Cupressales	Cupressaceae	Callitris macleayana	(F.Muell) F.Muell.	1	Least concern	0	0	0	0	0	0	0	0	0	0	0	0	0	0	0	0	0	0	0	0	0	0	0	0	0	0	0	0	0	0	0	0	0	0	0	0	0	0	0	1	0	0	0	0
Cupressales	Cupressaceae	Callitris oblonga	Rich. & A.Rich.	1	Vulnerable	0	0	0	0	0	0	0	0	0	0	0	0	0	0	0	0	0	0	0	0	0	0	0	0	0	0	0	0	0	0	0	0	0	0	0	0	0	0	0	1	0	0	0	0
Cupressales	Cupressaceae	Callitris preissii	Miq.	1	Least concern	0	0	0	0	0	0	0	0	0	0	0	0	0	0	0	0	0	0	0	0	0	0	0	0	0	0	0	0	0	0	0	0	0	0	0	0	0	0	0	0	1	0	0	0
Cupressales	Cupressaceae	Callitris rhomboidea	R.Br. Ex A.Rich.	1	Least concern	0	0	0	0	0	0	0	0	0	0	0	0	0	0	0	0	0	0	0	0	0	0	0	0	0	0	0	0	0	0	0	0	0	0	0	0	0	0	0	1	0	0	0	0
Cupressales	Cupressaceae	Callitris verrucosa	(A.Cunn. ex Endl.) F.Muell.	1	Least concern	0	0	0	0	0	0	0	0	0	0	0	0	0	0	0	0	0	0	0	0	0	0	0	0	0	0	0	0	0	0	0	0	0	0	0	0	0	0	0	1	0	1	0	0
Cupressales	Cupressaceae	Calocedrus decurrens	(Torr.) Florin	3	Least concern	0	0	0	0	0	0	0	0	0	0	0	0	0	0	0	1	0	0	0	0	0	0	0	0	0	0	0	0	0	0	0	0	0	0	0	0	0	0	0	0	0	0	0	0
Sapindales	Rutaceae	Calodendrum capense	(L.f.) Thunb.	19	Not assessed	0	0	0	0	1	0	0	0	0	0	0	0	0	0	0	0	0	0	0	0	0	1	0	0	0	0	0	0	0	0	0	0	0	0	0	0	0	0	0	0	0	0	0	0
Malpighiales	Clusiaceae	Calophyllum inophyllum	L.	1	Least concern	0	0	0	0	0	0	0	0	0	1	0	0	0	0	0	0	0	0	0	0	0	0	1	0	1	1	1	1	0	0	1	0	0	0	0	0	0	0	0	1	0	0	0	0
Fabales	Fabaceae	Calpurnia aurea	(Aiton) Benth.	7	Not assessed	0	0	0	0	1	0	0	0	0	0	0	0	0	0	0	0	0	1	1	1	1	1	0	0	0	0	0	0	0	0	0	0	0	0	0	0	0	0	0	0	0	0	0	0
Fabales	Fabaceae	Calpurnia sericea	Harv.	1	Not assessed	0	0	0	0	0	0	0	0	0	0	0	0	0	0	0	0	0	0	0	0	0	1	0	0	0	0	0	0	0	0	0	0	0	0	0	0	0	0	0	0	0	0	0	0
Ericales	Theaceae	Camellia crapnelliana	Tutcher	1	Vulnerable	0	0	0	0	0	0	0	0	0	1	0	0	0	0	0	0	0	0	0	0	0	0	0	0	0	0	0	0	0	0	0	0	0	0	0	0	0	0	0	0	0	0	0	0
Ericales	Theaceae	Camellia japonica	L.	13	Least concern	0	0	0	0	1	0	0	0	0	1	0	0	0	0	0	0	0	0	0	0	0	0	0	0	0	0	0	0	0	0	0	0	0	0	0	0	0	0	0	0	0	0	0	0
Ericales	Theaceae	Camellia japonica cv. 'Blood of China'	L.	1	NA	0	0	0	0	0	0	0	0	0	0	0	0	0	0	0	0	0	0	0	0	0	0	0	0	0	0	0	0	0	0	0	0	0	0	0	0	0	0	0	0	0	0	0	0
Ericales	Theaceae	Camellia japonica cv. 'Cho Cho San'	L.	1	NA	0	0	0	0	0	0	0	0	0	0	0	0	0	0	0	0	0	0	0	0	0	0	0	0	0	0	0	0	0	0	0	0	0	0	0	0	0	0	0	0	0	0	0	0
Ericales	Theaceae	Camellia japonica cv. 'Debutante'	L.	1	NA	0	0	0	0	0	0	0	0	0	0	0	0	0	0	0	0	0	0	0	0	0	0	0	0	0	0	0	0	0	0	0	0	0	0	0	0	0	0	0	0	0	0	0	0
Ericales	Theaceae	Camellia japonica cv. 'Royal velvet'	L.	2	NA	0	0	0	0	0	0	0	0	0	0	0	0	0	0	0	0	0	0	0	0	0	0	0	0	0	0	0	0	0	0	0	0	0	0	0	0	0	0	0	0	0	0	0	0
Ericales	Theaceae	Camellia japonica cv. 'William S. Hastie'	L.	1	NA	0	0	0	0	0	0	0	0	0	0	0	0	0	0	0	0	0	0	0	0	0	0	0	0	0	0	0	0	0	0	0	0	0	0	0	0	0	0	0	0	0	0	0	0
Ericales	Theaceae	Camellia petelotii var. petelotti	Merrill	1	Not assessed	0	0	0	0	0	0	0	0	0	1	0	0	0	0	0	0	0	0	0	0	0	0	0	0	0	0	0	0	0	0	0	0	0	0	0	0	0	0	0	0	0	0	0	0
Ericales	Theaceae	Camellia reticulata	Lindl.	1	Data deficient	0	0	0	0	1	0	0	0	0	1	0	0	0	0	0	0	0	0	0	0	0	0	0	0	0	0	0	0	0	0	0	0	0	0	0	0	0	0	0	0	0	0	0	0
Ericales	Theaceae	Camellia saluenensis	Stapf ex Bean	1	Least concern	0	0	0	0	0	0	0	0	0	1	0	0	0	0	0	0	0	0	0	0	0	0	0	0	0	0	0	0	0	0	0	0	0	0	0	0	0	0	0	0	0	0	0	0
Ericales	Theaceae	Camellia sasanqua	Thunb.	3	Least concern	0	0	0	0	0	0	0	0	0	1	0	0	0	0	0	0	0	0	0	0	0	0	0	0	0	0	0	0	0	0	0	0	0	0	0	0	0	0	0	0	0	0	0	0
Ericales	Theaceae	Camellia sinensis	(L.) Kuntze	7	Not assessed	0	0	0	0	0	0	0	0	0	1	1	0	0	0	0	0	0	0	0	0	0	0	0	0	0	0	0	0	0	0	0	0	0	0	0	0	0	0	0	0	0	0	0	0
Lamiales	Bignoniaceae	Campsis radicans	(L.) Seem. ex Bureau	1	Not assessed	0	0	0	0	0	0	0	0	0	0	0	0	0	0	0	1	0	0	0	0	0	0	0	0	0	0	0	0	0	0	0	0	0	0	0	0	0	0	0	0	0	0	0	0
Lamiales	Bignoniaceae	Campsis x tagliabuana cv. 'Madam Galen'	(Vis.) Rehder	1	NA	0	0	0	0	0	0	0	0	0	0	0	0	0	0	0	0	0	0	0	0	0	0	0	0	0	0	0	0	0	0	0	0	0	0	0	0	0	0	0	0	0	0	0	0
Magnoliales	Annonaceae	Cananga odorata	(Lam.) Hook.f. & Thomson	1	Not assessed	0	0	0	0	0	0	0	0	0	0	0	0	0	0	0	0	0	0	0	0	0	0	0	0	0	1	1	0	0	0	0	0	0	0	0	0	0	0	0	1	0	0	0	0
Gentianales	Rubiaceae	Canthium armatum	(K.Schum.) Lantz	1	Not assessed	0	0	0	0	0	0	0	0	0	0	0	0	0	0	0	0	0	0	0	0	0	1	0	0	0	0	0	0	0	0	0	0	0	0	0	0	0	0	0	0	0	0	0	0
Gentianales	Rubiaceae	Canthium ciliatum	(Klotzsch) Kuntze	1	Least concern	0	0	0	0	0	0	0	0	0	0	0	0	0	0	0	0	0	0	0	0	0	1	0	0	0	0	0	0	0	0	0	0	0	0	0	0	0	0	0	0	0	0	0	0
Gentianales	Rubiaceae	Canthium gilfillanii	(N.E.Br.) O.B. Mill.	2	Least concern	0	0	0	0	0	0	0	0	0	0	0	0	0	0	0	0	0	0	0	0	0	1	0	0	0	0	0	0	0	0	0	0	0	0	0	0	0	0	0	0	0	0	0	0
Gentianales	Rubiaceae	Canthium inerme	(L.f.) Kuntze	9	Not assessed	0	0	0	0	0	0	0	0	0	0	0	0	0	0	0	0	0	0	0	0	0	1	0	0	0	0	0	0	0	0	0	0	0	0	0	0	0	0	0	0	0	0	0	0
Gentianales	Rubiaceae	Canthium mundianum	Cham. & Schltdl.	2	Not assessed	0	0	0	0	0	0	0	0	0	0	0	0	0	0	0	0	0	0	0	0	0	1	0	0	0	0	0	0	0	0	0	0	0	0	0	0	0	0	0	0	0	0	0	0
Gentianales	Rubiaceae	Canthium spinosum	(Klotzsch) Kuntze	1	Not assessed	0	0	0	0	0	0	0	1	0	0	0	0	0	0	0	0	0	0	0	0	0	1	0	0	0	0	0	0	0	0	0	0	0	0	0	0	0	0	0	0	0	0	0	0
Brassicales	Capparaceae	Capparis spinosa	L.	1	Least concern	0	0	0	0	0	0	0	1	0	0	0	1	0	0	0	0	0	0	0	0	0	0	0	0	0	0	0	0	0	0	0	0	0	0	0	0	0	0	0	1	0	1	0	0
Brassicales	Capparaceae	Capparis tomentosa	Lam.	1	Not assessed	0	0	0	0	0	0	0	0	0	0	0	0	0	0	0	0	1	1	1	1	1	1	0	0	0	0	0	0	0	0	0	0	0	0	0	0	0	0	0	0	0	0	0	0
Brassicales	Caricaceae	Carica papaya	L.	1	Data deficient	1	0	0	0	0	0	0	0	0	0	0	0	0	0	0	0	0	0	0	0	0	0	0	0	0	0	0	0	0	0	0	1	0	0	0	0	0	0	0	0	0	0	0	0
Gentianales	Apocynaceae	Carissa bispinosa	Desf. ex Brenan	13	Not assessed	0	0	0	0	0	0	0	0	0	0	0	0	0	0	0	0	0	0	0	0	1	1	0	0	0	0	0	0	0	0	0	0	0	0	0	0	0	0	0	0	0	0	0	0
Gentianales	Apocynaceae	Carissa edulis	(Forssk.) Vahl	2	Least concern	0	0	0	0	0	0	0	0	0	0	0	0	0	0	0	0	1	1	1	0	1	1	0	0	0	0	0	0	0	0	0	0	0	0	0	0	0	0	0	0	0	0	0	0
Gentianales	Apocynaceae	Carissa macrocarpa	(Ecklon) A.DC.	10	Not assessed	0	0	0	0	0	0	0	0	0	0	0	0	0	0	0	0	0	0	0	0	0	1	0	0	0	0	0	0	0	0	0	0	0	0	0	0	0	0	0	0	0	0	0	0
Gentianales	Apocynaceae	Carissa macrocarpa cv. 'Green Carpet'	(Ecklon) A.DC.	1	NA	0	0	0	0	0	0	0	0	0	0	0	0	0	0	0	0	0	0	0	0	0	0	0	0	0	0	0	0	0	0	0	0	0	0	0	0	0	0	0	0	0	0	0	0
Gentianales	Apocynaceae	Carissa spinarum	L.	1	Least concern	0	0	0	0	0	0	0	0	0	1	0	0	0	0	0	0	0	1	1	1	1	1	0	0	1	1	1	0	0	0	0	0	0	0	0	0	0	0	0	1	0	0	0	0
Gentianales	Apocynaceae	Carissa tetramera	(Sacleux) Stapf	1	Not assessed	0	0	0	0	0	0	0	0	0	0	0	0	0	0	0	0	0	0	0	0	0	1	0	0	0	0	0	0	0	0	0	0	0	0	0	0	0	0	0	0	0	0	0	0
Arecales	Arecaceae	Carpentaria acuminata	(H. Wendl. & Drude) Becc.	2	Not assessed	0	0	0	0	0	0	0	0	0	0	0	0	0	0	0	0	0	0	0	0	0	0	0	0	0	0	0	0	0	0	0	0	0	0	0	0	0	0	0	1	0	0	0	0
Fagales	Betulaceae	Carpinus betulus	L.	3	Least concern	0	0	0	0	0	0	0	1	0	0	1	1	0	0	0	0	0	0	0	0	0	0	0	0	0	0	0	0	0	0	0	0	0	0	0	0	0	0	0	0	0	0	0	0
Fagales	Juglandaceae	Carya illinoinensis	(Wangenh.) K.Koch	5	Not assessed	0	0	1	0	1	0	0	0	0	0	0	0	0	0	1	0	0	0	0	0	0	0	0	0	0	0	0	0	0	0	0	0	0	0	0	0	0	0	0	0	0	0	0	0
Arecales	Arecaceae	Caryota mitis	Lour.	7	Not assessed	0	0	1	0	0	0	0	0	0	0	0	0	0	0	0	0	0	0	0	0	0	0	0	0	1	1	1	0	0	0	0	0	0	0	0	0	0	0	0	0	0	0	0	0
Arecales	Arecaceae	Caryota urens	L.	6	Least concern	0	0	1	0	0	0	0	0	0	0	0	0	0	0	0	0	0	0	0	0	0	0	0	0	1	1	1	0	0	0	0	0	0	0	0	0	0	0	0	0	0	0	0	0
Gentianales	Apocynaceae	Cascabela thevetia	(L.) Lippold	2	Least concern	1	0	1	1	1	0	0	0	0	0	0	0	0	0	0	0	0	0	0	0	0	0	0	0	0	0	0	0	0	0	0	1	1	1	1	0	0	0	0	0	0	0	0	0
Malpighiales	Salicaceae	Casearia gladiiformis	Mast.	4	Not assessed	0	0	0	0	0	0	0	0	0	0	0	0	0	0	0	0	0	0	0	0	1	1	0	0	0	0	0	0	0	0	0	0	0	0	0	0	0	0	0	0	0	0	0	0
Sapindales	Rutaceae	Casimiroa edulis	La Llave	1	Least concern	0	0	0	0	0	0	0	0	0	0	0	0	0	0	0	0	0	0	0	0	0	0	0	0	0	0	0	0	0	0	0	1	0	0	0	0	0	0	0	0	0	0	0	0
Sapindales	Rutaceae	Casimiroa sapota	Oerst.	1	Not assessed	0	0	0	0	0	0	0	0	0	0	0	0	0	0	0	0	0	0	0	0	0	0	0	0	0	0	0	0	0	0	0	1	0	0	0	0	0	0	0	0	0	0	0	0
Fabales	Fabaceae	Cassia abbreviata	Oliv.	3	Not assessed	0	0	0	0	0	0	0	0	0	0	0	0	0	0	0	0	0	0	1	1	1	1	0	0	0	0	0	0	0	0	0	0	0	0	0	0	0	0	0	0	0	0	0	0
Fabales	Fabaceae	Cassia abbreviata subsp. beareana	(Holmes) Brenan	1	Not assessed	0	0	0	0	0	0	0	0	0	0	0	0	0	0	0	0	0	0	1	1	1	1	0	0	0	0	0	0	0	0	0	0	0	0	0	0	0	0	0	0	0	0	0	0
Fabales	Fabaceae	Cassia fistula	L.	4	Not assessed	0	0	1	0	0	0	0	0	0	0	0	0	0	0	0	0	0	0	0	0	0	0	0	0	1	0	0	0	0	0	0	0	0	0	0	0	0	0	0	0	0	0	0	0
Fabales	Fabaceae	Cassia javanica	L.	2	Not assessed	0	0	1	0	0	0	0	0	0	1	0	0	0	0	0	0	0	0	0	0	0	0	0	0	0	1	1	0	0	0	0	0	0	0	0	0	0	0	0	0	0	0	0	0
Fabales	Fabaceae	Cassia javanica subsp. nodosa	(Buch.-Ham. ex Roxb.) K.Larsen & S.S.Larsen	1	Not assessed	0	0	0	0	0	0	0	0	0	0	0	0	0	0	0	0	0	0	0	0	0	0	0	0	0	1	1	0	0	0	0	0	0	0	0	0	0	0	0	0	0	0	0	0
Celastrales	Celastraceae	Cassine parvifolia	Sond.	1	Not assessed	0	0	0	0	0	0	0	0	0	0	0	0	0	0	0	0	0	0	0	0	0	0	0	0	0	0	0	0	0	0	0	0	0	0	0	0	0	0	1	0	0	0	0	0
Celastrales	Celastraceae	Cassine peragua	L.	11	Not assessed	0	0	0	0	0	0	0	0	0	0	0	0	0	0	0	0	0	0	0	0	0	1	0	0	0	0	0	0	0	0	0	0	0	0	0	0	0	0	1	0	0	0	0	0
Celastrales	Celastraceae	Cassine peragua subsp. barbara	(L.) R.H.Archer	1	Not assessed	0	0	0	0	0	0	0	0	0	0	0	0	0	0	0	0	0	0	0	0	0	0	0	0	0	0	0	0	0	0	0	0	0	0	0	0	0	0	1	0	0	0	0	0
Celastrales	Celastraceae	Cassine schinoides	(Spreng.) R.H. Archer	3	Least concern	0	0	0	0	0	0	0	0	0	0	0	0	0	0	0	0	0	0	0	0	0	0	0	0	0	0	0	0	0	0	0	0	0	0	0	0	0	0	1	0	0	0	0	0
Celastrales	Celastraceae	Cassine transvaalensis	(Burtt Davy) R.H.Archer	1	Not assessed	0	0	0	0	0	0	0	0	0	0	0	0	0	0	0	0	0	0	0	0	1	1	0	0	0	0	0	0	0	0	0	0	0	0	0	0	0	0	0	0	0	0	0	0
Icacinales	Icacinaceae	Cassinopsis ilicifolia	(Hochst.) Kuntze	8	Least concern	0	0	0	0	0	0	0	0	0	0	0	0	0	0	0	0	0	0	0	0	0	1	0	0	0	0	0	0	0	0	0	0	0	0	0	0	0	0	0	0	0	0	0	0
Malpighiales	Rhizophoraceae	Cassipourea gummiflua	Tul.	4	Not assessed	0	0	0	0	0	0	0	0	0	0	0	0	0	0	0	0	0	1	0	0	1	1	1	0	0	0	0	0	0	0	0	0	0	0	0	0	0	0	0	0	0	0	0	0
Malpighiales	Rhizophoraceae	Cassipourea gummiflua var. verticillata	(N.E.Br.) J. Lewis	2	Not assessed	0	0	0	0	0	0	0	0	0	0	0	0	0	0	0	0	0	1	0	0	1	1	1	0	0	0	0	0	0	0	0	0	0	0	0	0	0	0	0	0	0	0	0	0
Malpighiales	Rhizophoraceae	Cassipourea malosana	(Bak.) Alston	3	Not assessed	0	0	0	0	0	0	0	0	0	0	0	0	0	0	0	0	0	0	0	0	1	1	0	0	0	0	0	0	0	0	0	0	0	0	0	0	0	0	0	0	0	0	0	0
Fagales	Fagaceae	Castanea sativa	Mill.	9	Least concern	1	0	1	0	0	0	0	0	0	0	0	1	0	0	0	0	0	0	0	0	0	0	0	0	0	0	0	0	0	0	0	0	0	0	0	0	0	0	0	0	0	0	0	0
Fabales	Fabaceae	Castanospermum australe	A.Cunn. ex Mudie	10	Not assessed	1	0	0	0	1	1	0	0	0	0	0	0	0	0	0	0	0	0	0	0	0	0	0	0	0	0	0	0	0	0	0	0	0	0	0	0	0	0	0	1	0	0	0	0
Fagales	Casuarinaceae	Casuarina cunninghamiana	Miq.	16	Not assessed	1	0	1	0	1	0	0	0	0	0	0	0	0	0	0	0	0	0	0	0	0	0	0	0	0	0	0	0	0	0	0	0	0	0	0	0	0	0	0	1	0	0	0	0
Fagales	Casuarinaceae	Casuarina equisetifolia	J.R.Forst. & G.Forst.	9	Not assessed	1	1	1	1	0	0	0	0	0	0	0	0	0	0	0	0	0	0	0	0	0	0	0	0	0	0	0	0	0	0	0	0	0	0	0	0	0	0	0	1	0	0	0	0
Fagales	Casuarinaceae	Casuarina glauca	Sieber ex Spreng.	1	Not assessed	0	1	1	0	0	0	0	0	0	0	0	0	0	0	0	0	0	0	0	0	0	0	0	0	0	0	0	0	0	0	0	0	0	0	0	0	0	0	0	1	0	0	0	0
Lamiales	Bignoniaceae	Catalpa bignonioides	Walter	5	Data deficient	0	0	0	0	0	0	0	0	0	0	0	0	0	1	1	0	0	0	0	0	0	0	0	0	0	0	0	0	0	0	0	0	0	0	0	0	0	0	0	0	0	0	0	0
Lamiales	Bignoniaceae	Catalpa speciosa	E.Y.Teas	1	Least concern	0	0	0	0	1	0	0	0	0	0	0	0	0	1	0	0	0	0	0	0	0	0	0	0	0	0	0	0	0	0	0	0	0	0	0	0	0	0	0	0	0	0	0	0
Celastrales	Celastraceae	Catha edulis	(Vahl) Forssk. ex Endl.	11	Least concern	0	0	0	0	0	0	0	0	0	0	0	0	0	0	0	0	1	0	1	1	1	1	0	0	0	0	0	0	0	0	0	0	0	0	0	0	0	0	0	0	0	0	0	0
Celastrales	Celastraceae	Catha transvaalensis	Codd.	1	Not assessed	0	0	0	0	0	0	0	0	0	0	0	0	0	0	0	0	0	0	0	0	0	1	0	0	0	0	0	0	0	0	0	0	0	0	0	0	0	0	0	0	0	0	0	0
Lamiales	Bignoniaceae	Catophractes alexandri	D.Don	1	Least concern	0	0	0	0	0	0	0	0	0	0	0	0	0	0	0	0	0	0	0	0	0	1	0	0	0	0	0	0	0	0	0	0	0	0	0	0	0	0	0	0	0	0	0	0
Gentianales	Rubiaceae	Catunaregam spinosa	(Thunb.) Tirveng.	4	Not assessed	0	0	0	0	0	0	0	0	0	1	0	0	0	0	0	0	0	0	0	0	1	1	0	0	1	0	0	0	0	0	0	0	0	0	0	0	0	0	0	0	0	0	0	0
Malpighiales	Euphorbiaceae	Cavacoa aurea	(Cavaco) J.Léonard	3	Not assessed	0	0	0	0	0	0	0	0	0	0	0	0	0	0	0	0	0	0	0	0	1	1	0	0	0	0	0	0	0	0	0	0	0	0	0	0	0	0	0	0	0	0	0	0
Rosales	Urticaceae	Cecropia peltata	L.	1	Least concern	0	1	1	0	0	0	0	0	0	0	0	0	0	0	0	0	0	0	0	0	0	0	0	0	0	0	0	0	0	0	0	1	1	0	0	0	0	0	0	0	0	0	0	0
Sapindales	Meliaceae	Cedrela odorata	L.	2	Vulnerable	0	1	1	1	0	0	0	0	0	0	0	0	0	0	0	0	0	0	0	0	0	0	0	0	0	0	0	0	0	0	0	1	1	0	1	0	1	0	0	0	0	0	0	0
Pinales	Pinaceae	Cedrus atlantica	(Endl.) Manetti & Carrière	6	Endangered	0	0	0	0	1	0	0	0	0	0	0	1	0	0	0	0	0	0	0	0	0	0	0	0	0	0	0	0	0	0	0	0	0	0	0	0	0	0	0	0	0	0	0	0
Pinales	Pinaceae	Cedrus deodara	(Roxb.) G.Don	32	Least concern	1	0	0	0	0	0	0	0	0	0	0	0	0	0	0	0	1	0	0	0	0	0	0	0	0	0	0	0	0	0	0	0	0	0	0	0	0	0	0	0	0	0	0	0
Pinales	Pinaceae	Cedrus libani	A.Rich.	3	Vulnerable	0	0	0	0	0	0	0	0	0	0	0	1	0	0	0	0	0	0	0	0	0	0	0	0	0	0	0	0	0	0	0	0	0	0	0	0	0	0	0	0	0	0	0	0
Malvales	Malvaceae	Ceiba aesculifolia	(Kunth) Britten & Baker	1	Not assessed	0	0	0	0	0	0	0	0	0	0	0	0	0	0	0	0	0	0	0	0	0	0	0	0	0	0	0	0	0	0	0	1	0	0	0	0	0	0	0	0	0	0	0	0
Malvales	Malvaceae	Ceiba chodatii	(Hassl.) Ravenna	1	Not assessed	0	0	0	0	0	0	0	0	0	0	0	0	0	0	0	0	0	0	0	0	0	0	0	0	0	0	0	0	0	0	0	0	0	0	1	0	1	0	0	0	0	0	0	0
Malvales	Malvaceae	Ceiba insignis	(Kunth) P.E. Gibbs & Semir	1	Not assessed	0	0	0	0	0	0	0	0	0	0	0	0	0	0	0	0	0	0	0	0	0	0	0	0	0	0	0	0	0	0	0	0	0	1	0	0	0	0	0	0	0	0	0	0
Malvales	Malvaceae	Ceiba pentandra	(L.) Gaertn.	3	Least concern	0	0	0	0	1	0	0	0	0	0	0	0	0	0	0	0	0	0	0	1	0	0	0	0	0	0	0	0	0	0	0	1	1	1	0	1	0	0	0	0	0	0	0	0
Malvales	Malvaceae	Ceiba speciosa	(A. St.-Hil.) Ravenna	11	Not assessed	0	0	0	0	1	0	0	0	0	0	0	0	0	0	0	0	0	0	0	0	0	0	0	0	0	0	0	0	0	0	0	0	0	0	1	0	1	0	0	0	0	0	0	0
Rosales	Cannabaceae	Celtis africana	Burm. f.	52	Not assessed	0	0	0	0	1	0	0	0	0	0	0	0	0	0	0	0	1	1	1	1	1	1	1	0	0	0	0	0	0	0	0	0	0	0	0	0	0	0	0	0	0	0	0	0
Rosales	Cannabaceae	Celtis australis	L.	6	Least concern	1	0	1	0	0	0	0	0	0	0	0	1	0	0	0	0	0	0	0	0	0	0	0	0	0	0	0	0	0	0	0	0	0	0	0	0	0	0	0	0	0	0	0	0
Rosales	Cannabaceae	Celtis gomphophylla	Baker	4	Least concern	0	0	0	0	0	0	0	0	0	0	0	0	0	0	0	0	0	0	0	1	1	1	1	0	0	0	0	0	0	0	0	0	0	0	0	0	0	0	0	0	0	0	0	0
Rosales	Cannabaceae	Celtis mildbraedii	Engl.	3	Least concern	0	0	0	0	0	0	0	0	0	0	0	0	0	0	0	0	0	1	0	1	1	1	0	0	0	0	0	0	0	0	0	0	0	0	0	0	0	0	0	0	0	0	0	0
Rosales	Cannabaceae	Celtis occidentalis	L.	1	Least concern	0	0	0	0	0	0	0	0	0	0	0	0	0	1	1	0	0	0	0	0	0	0	0	0	0	0	0	0	0	0	0	0	0	0	0	0	0	0	0	0	0	0	0	0
Rosales	Cannabaceae	Celtis sinensis	Pers.	11	Least concern	1	1	1	0	0	0	0	0	0	1	0	0	0	0	0	0	0	0	0	0	0	0	0	0	0	0	0	0	0	0	0	0	0	0	0	0	0	0	0	0	0	0	0	0
Fabales	Fabaceae	Centrolobium robustum	(Vell.) Mart. ex Benth.	1	Not assessed	0	0	0	0	0	0	0	0	0	0	0	0	0	0	0	0	0	0	0	0	0	0	0	0	0	0	0	0	0	0	0	0	0	0	1	0	0	0	0	0	0	0	0	0
Gentianales	Rubiaceae	Cephalanthus natalensis	Oliv.	2	Least concern	0	0	0	0	0	0	0	0	0	0	0	0	0	0	0	0	0	0	0	0	0	1	0	0	0	0	0	0	0	0	0	0	0	0	0	0	0	0	0	0	0	0	0	0
Pinales	Cephalotaxaceae	Cephalotaxus fortunei	Hook.	2	Least concern	0	0	0	0	0	0	0	0	0	1	0	0	0	0	0	0	0	0	0	0	0	0	0	0	0	0	0	0	0	0	0	0	0	0	0	0	0	0	0	0	0	0	0	0
Pinales	Cephalotaxaceae	Cephalotaxus harringtonia	(Knight ex J.Forbes) K.Koch	2	Least concern	0	0	0	0	0	0	0	0	0	1	0	0	0	0	0	0	0	0	0	0	0	0	0	0	0	0	0	0	0	0	0	0	0	0	0	0	0	0	0	0	0	0	0	0
Caryophyllales	Didiereaceae	Ceraria fruticulosa	H.Pearson & Stephens	1	Not assessed	0	0	0	0	0	0	0	0	0	0	0	0	0	0	0	0	0	0	0	0	0	1	0	0	0	0	0	0	0	0	0	0	0	0	0	0	0	0	0	0	0	0	0	0
Fabales	Fabaceae	Ceratonia siliqua	L.	15	Least concern	0	0	1	0	0	0	0	0	0	0	0	1	0	0	0	0	0	0	0	0	0	0	0	0	0	0	0	0	0	0	0	0	0	0	0	0	0	0	0	0	0	0	0	0
Oxalidales	Cunoniaceae	Ceratopetalum gummiferum	Sm.	2	Not assessed	0	0	0	0	0	0	0	0	0	0	0	0	0	0	0	0	0	0	0	0	0	0	0	0	0	0	0	0	0	0	0	0	0	0	0	0	0	0	0	1	0	0	0	0
Lamiales	Pedaliaceae	Ceratotheca triloba	(Bernh.) E.Mey. ex Hook.f.	1	Not assessed	0	0	0	0	0	0	0	0	0	0	0	0	0	0	0	0	0	0	0	0	1	1	0	0	0	0	0	0	0	0	0	0	0	0	0	0	0	0	0	0	0	0	0	0
Gentianales	Apocynaceae	Cerbera manghas	L.	1	Not assessed	0	0	0	0	0	0	0	0	0	1	0	0	0	0	0	0	0	0	0	0	0	0	0	0	0	1	1	0	0	1	1	0	0	0	0	0	0	0	0	1	0	0	0	0
Fabales	Fabaceae	Cercis siliquastrum	L.	3	Least concern	0	0	0	0	0	0	0	0	0	0	0	1	0	0	0	0	0	0	0	0	0	0	0	0	0	0	0	0	0	0	0	0	0	0	0	0	0	0	0	0	0	0	0	0
Solanales	Solanaceae	Cestrum aurantiacum	Lindl.	1	Least concern	1	0	1	0	0	0	0	0	0	0	0	0	0	0	0	0	0	0	0	0	0	0	0	0	0	0	0	0	0	0	0	1	0	0	0	0	0	0	0	0	0	0	0	0
Solanales	Solanaceae	Cestrum elegans	(Brongn. ex Neumann) Schltdl.	1	Least concern	1	0	1	0	0	0	0	0	0	0	0	0	0	0	0	0	0	0	0	0	0	0	0	0	0	0	0	0	0	0	0	1	0	0	0	0	0	0	0	0	0	0	0	0
Solanales	Solanaceae	Cestrum fasciculatum cv. 'Newellii'	(Schltdl.) Miers	1	NA	0	0	0	0	0	0	0	0	0	0	0	0	0	0	0	0	0	0	0	0	0	0	0	0	0	0	0	0	0	0	0	0	0	0	0	0	0	0	0	0	0	0	0	0
Solanales	Solanaceae	Cestrum laevigatum	Schltdl.	2	Not assessed	1	1	1	0	0	0	0	0	0	0	0	0	0	0	0	0	0	0	0	0	0	0	0	0	0	0	0	0	0	0	0	1	1	1	1	0	1	0	0	0	0	0	0	0
Rosales	Rosaceae	Chaenomeles × superba cv. 'Pink Lady'	(Frahm) Rehder	1	NA	0	0	0	0	0	0	0	0	0	0	0	0	0	0	0	0	0	0	0	0	0	0	0	0	0	0	0	0	0	0	0	0	0	0	0	0	0	0	0	0	0	0	0	0
Rosales	Rosaceae	Chaenomeles japonica	(Thunb.) Lindl. Ex Spach	2	Not assessed	0	0	0	0	0	0	0	0	0	1	0	0	0	0	0	0	0	0	0	0	0	0	0	0	0	0	0	0	0	0	0	0	0	0	0	0	0	0	0	0	0	0	0	0
Rosales	Rosaceae	Chaenomeles speciosa	(Sweet) Nakai	1	Not assessed	0	0	0	0	0	0	0	0	0	1	0	0	0	0	0	0	0	0	0	0	0	0	0	0	0	0	0	0	0	0	0	0	0	0	0	0	0	0	0	0	0	0	0	0
Rosales	Rosaceae	Chaenomeles speciosa cv. 'Guarjardii'	(Sweet) Nakai	1	NA	0	0	0	0	0	0	0	0	0	0	0	0	0	0	0	0	0	0	0	0	0	0	0	0	0	0	0	0	0	0	0	0	0	0	0	0	0	0	0	0	0	0	0	0
Rosales	Rosaceae	Chaenomeles speciosa cv. 'Rosea plena'	(Sweet) Nakai	1	NA	0	0	0	0	0	0	0	0	0	0	0	0	0	0	0	0	0	0	0	0	0	0	0	0	0	0	0	0	0	0	0	0	0	0	0	0	0	0	0	0	0	0	0	0
Rosales	Ulmaceae	Chaetachme aristata	Planch.	6	Not assessed	0	0	0	0	0	0	0	0	0	0	0	0	0	0	0	0	0	0	0	0	0	1	0	0	0	0	0	0	0	0	0	0	0	0	0	0	0	0	0	0	0	0	0	0
Cupressales	Cupressaceae	Chamaecyparis lawsoniana	(A.Murray bis) Parl.	7	Near threatened	0	0	0	0	0	0	0	0	0	0	0	0	0	0	0	1	0	0	0	0	0	0	0	0	0	0	0	0	0	0	0	0	0	0	0	0	0	0	0	0	0	0	0	0
Cupressales	Cupressaceae	Chamaecyparis lawsoniana cv. 'Nidiformis'	(A.Murray bis) Parl.	1	NA	0	0	0	0	0	0	0	0	0	0	0	0	0	0	0	0	0	0	0	0	0	0	0	0	0	0	0	0	0	0	0	0	0	0	0	0	0	0	0	0	0	0	0	0
Cupressales	Cupressaceae	Chamaecyparis obtusa	(Siebold & Zucc.) Endl.	1	Near threatened	0	0	0	0	0	0	0	0	0	1	0	0	0	0	0	0	0	0	0	0	0	0	0	0	0	0	0	0	0	0	0	0	0	0	0	0	0	0	0	0	0	0	0	0
Cupressales	Cupressaceae	Chamaecyparis obtusa cv. 'Crippsii'	(Siebold & Zucc.) Endl.	1	NA	0	0	0	0	0	0	0	0	0	0	0	0	0	0	0	0	0	0	0	0	0	0	0	0	0	0	0	0	0	0	0	0	0	0	0	0	0	0	0	0	0	0	0	0
Cupressales	Cupressaceae	Chamaecyparis pisifera	(Siebold & Zucc.) Endl.	2	Least concern	0	0	0	0	0	0	0	0	0	1	0	0	0	0	0	0	0	0	0	0	0	0	0	0	0	0	0	0	0	0	0	0	0	0	0	0	0	0	0	0	0	0	0	0
Arecales	Arecaceae	Chamaedorea elegans	Mart.	1	Not assessed	0	0	0	0	0	0	0	0	0	0	0	0	0	0	0	0	0	0	0	0	0	0	0	0	0	0	0	0	0	0	0	1	0	0	0	0	0	0	0	0	0	0	0	0
Arecales	Arecaceae	Chamaedorea oblongata	Mart.	1	Vulnerable	0	0	0	0	0	0	0	0	0	0	0	0	0	0	0	0	0	0	0	0	0	0	0	0	0	0	0	0	0	0	0	1	0	0	0	0	0	0	0	0	0	0	0	0
Arecales	Arecaceae	Chamaedorea plumosa	Hodel	1	Critically endangered	0	0	0	0	0	0	0	0	0	0	0	0	0	0	0	0	0	0	0	0	0	0	0	0	0	0	0	0	0	0	0	1	0	0	0	0	0	0	0	0	0	0	0	0
Arecales	Arecaceae	Chamaedorea tepejilote	Liebm.	2	Not assessed	0	0	0	0	0	0	0	0	0	0	0	0	0	0	0	0	0	0	0	0	0	0	0	0	0	0	0	0	0	0	0	1	0	0	0	0	0	0	0	0	0	0	0	0
Arecales	Arecaceae	Chamaerops humilis	L.	8	Least concern	0	0	0	0	0	0	0	0	0	0	0	1	0	0	0	0	0	0	0	0	0	0	0	0	0	0	0	0	0	0	0	0	0	0	0	0	0	0	0	0	0	0	0	0
Laurales	Calycanthaceae	Chimonanthus praecox	(L.) Link	1	Least concern	0	0	0	0	0	0	0	0	0	1	0	0	0	0	0	0	0	0	0	0	0	0	0	0	0	0	0	0	0	0	0	0	0	0	0	0	0	0	0	0	0	0	0	0
Lamiales	Oleaceae	Chionanthus battiscombei	(Hutch.) Stearn	2	Not assessed	0	0	0	0	0	0	0	0	0	0	0	0	0	0	0	0	0	0	0	0	1	1	0	0	0	0	0	0	0	0	0	0	0	0	0	0	0	0	0	0	0	0	0	0
Malvales	Malvaceae	Chiranthodendron pentadactylon	Larreat.	1	Least concern	0	0	0	0	0	0	0	0	0	0	0	0	0	0	0	0	0	0	0	0	0	0	0	0	0	0	0	0	0	0	0	1	0	0	0	0	0	0	0	0	0	0	0	0
Saxifragales	Iteaceae	Choristylis rhamnoides	Harv.	2	Not assessed	0	0	0	1	0	0	0	0	0	0	0	0	0	0	0	0	0	0	0	1	1	1	0	0	0	0	0	0	0	0	0	0	0	0	0	0	0	0	0	0	0	0	0	0
Asterales	Asteraceae	Chrysanthemoides monilifera	(L.) Norl.	3	Not assessed	0	1	1	1	1	0	0	0	0	0	0	0	0	0	0	0	0	0	0	0	0	1	0	0	0	0	0	0	0	0	0	0	0	0	0	0	0	0	1	0	0	0	0	0
Asterales	Asteraceae	Chrysanthemoides monilifera subsp. pisifera	(L.) J.C.Manning & Goldblatt	1	Not assessed	0	0	0	0	0	0	0	0	0	0	0	0	0	0	0	0	0	0	0	0	0	0	0	0	0	0	0	0	0	0	0	0	0	0	0	0	0	0	1	0	0	0	0	0
Ericales	Sapotaceae	Chrysophyllum cainito	L.	1	Not assessed	0	0	1	0	0	0	0	0	0	0	0	0	0	0	0	0	0	0	0	0	0	0	0	0	0	0	0	0	0	0	0	1	0	0	0	0	0	0	0	0	0	0	0	0
Ericales	Sapotaceae	Chrysophyllum gorungosanum	Engl.	1	Not assessed	0	0	0	0	0	0	0	0	0	0	0	0	0	0	0	0	0	0	0	1	1	0	0	0	0	0	0	0	0	0	0	0	0	0	0	0	0	0	0	0	0	0	0	0
Ericales	Sapotaceae	Chrysophyllum oliviforme	Lam.	5	Not assessed	0	0	1	0	0	0	0	0	0	0	0	0	0	0	0	0	0	0	0	0	0	0	0	0	0	0	0	0	0	0	0	1	0	0	0	0	0	0	0	0	0	0	0	0
Ericales	Sapotaceae	Chrysophyllum viridifolium	J.M. Wood & Franks	5	Not assessed	0	0	0	0	0	0	0	0	0	0	0	0	0	0	0	0	0	0	0	0	1	1	0	0	0	0	0	0	0	0	0	0	0	0	0	0	0	0	0	0	0	0	0	0
Sapindales	Meliaceae	Chukrasia tabularis	A. Juss.	1	Least concern	1	0	1	0	0	0	0	0	0	1	0	0	0	0	0	0	0	0	0	0	0	0	0	0	1	1	0	0	0	0	0	0	0	0	0	0	0	0	0	0	0	0	0	0
Laurales	Lauraceae	Cinnamomum burmanni	(Nees & T.Nees) Blume	1	Least concern	0	0	1	0	0	0	0	0	0	1	0	0	0	0	0	0	0	0	0	0	0	0	0	0	1	1	1	0	0	0	0	0	0	0	0	0	0	0	0	0	0	0	0	0
Laurales	Lauraceae	Cinnamomum camphora	(L.) J.Presl.	28	Not assessed	1	1	1	1	1	0	0	0	0	1	0	0	0	0	0	0	0	0	0	0	0	0	0	0	0	0	0	0	0	0	0	0	0	0	0	0	0	0	0	0	0	0	0	0
Laurales	Lauraceae	Cinnamomum verum	J. Presl.	3	Not assessed	0	1	1	0	0	0	0	0	0	0	0	0	0	0	0	0	0	0	0	0	0	0	0	0	1	0	0	0	0	0	0	0	0	0	0	0	0	0	0	0	0	0	0	0
Ranunculales	Menispermaceae	Cissampelos capensis	L.f.	1	Not assessed	0	0	0	0	0	0	0	0	0	0	0	0	0	0	0	0	0	0	0	0	0	1	0	0	0	0	0	0	0	0	0	0	0	0	0	0	0	0	0	0	0	0	0	0
Lamiales	Verbenaceae	Citharexylum spinosum	L.	10	Not assessed	0	0	1	1	0	0	0	0	0	0	0	0	0	0	0	0	0	0	0	0	0	0	0	0	0	0	0	0	0	0	0	1	1	0	0	0	0	0	0	0	0	0	0	0
Sapindales	Rutaceae	Citrus × aurantium	L.	1	NA	0	0	0	0	0	0	0	0	0	0	0	0	0	0	0	0	0	0	0	0	0	0	0	0	0	0	0	0	0	0	0	0	0	0	0	0	0	0	0	0	0	0	0	0
Sapindales	Rutaceae	Citrus × paradisi	Macfad.	1	Not assessed	0	0	0	0	0	0	0	0	0	0	0	0	0	0	0	0	0	0	0	0	0	0	0	0	0	0	0	0	0	0	0	0	0	0	0	0	0	0	0	0	0	0	0	0
Sapindales	Rutaceae	Citrus hystrix	DC.	2	Not assessed	0	0	0	0	0	0	0	0	0	0	0	0	0	0	0	0	0	0	0	0	0	0	0	0	1	1	1	0	0	0	0	0	0	0	0	0	0	0	0	0	0	0	0	0
Sapindales	Rutaceae	Citrus jambhiri	Lush.	1	Not assessed	0	0	0	0	0	0	0	0	0	0	0	0	0	0	0	0	0	0	0	0	0	0	0	0	0	0	0	0	0	0	0	0	0	0	0	0	0	0	0	0	0	0	0	0
Sapindales	Rutaceae	Citrus japonica	Thunb.	4	Not assessed	0	0	0	0	0	0	0	0	0	1	0	0	0	0	0	0	0	0	0	0	0	0	0	0	0	0	0	0	0	0	0	0	0	0	0	0	0	0	0	0	0	0	0	0
Sapindales	Rutaceae	Citrus limon	(L.) Burm.f.	2	Least concern	1	0	1	0	1	0	0	0	0	1	0	0	0	0	0	0	0	0	0	0	0	0	0	0	0	0	0	0	0	0	0	0	0	0	0	0	0	0	0	0	0	0	0	0
Sapindales	Rutaceae	Citrus limon cv. 'Eureka'	(L.) Burm.f.	1	NA	0	0	0	0	0	0	0	0	0	0	0	0	0	0	0	0	0	0	0	0	0	0	0	0	0	0	0	0	0	0	0	0	0	0	0	0	0	0	0	0	0	0	0	0
Sapindales	Rutaceae	Citrus limon cv. 'Meyer'	(L.) Burm.f.	1	NA	0	0	0	0	0	0	0	0	0	0	0	0	0	0	0	0	0	0	0	0	0	0	0	0	0	0	0	0	0	0	0	0	0	0	0	0	0	0	0	0	0	0	0	0
Sapindales	Rutaceae	Citrus maxima	(Burm.) Merr.	2	Least concern	0	0	0	0	0	0	0	0	0	0	0	0	0	0	0	0	0	0	0	0	0	0	0	0	0	1	0	0	0	0	0	0	0	0	0	0	0	0	0	0	0	0	0	0
Sapindales	Rutaceae	Citrus medica	L.	2	Not assessed	0	0	0	0	0	0	0	0	0	0	0	0	0	0	0	0	0	0	0	0	0	0	0	0	1	0	0	0	0	0	0	0	0	0	0	0	0	0	0	0	0	0	0	0
Sapindales	Rutaceae	Citrus sinensis	(L.) Osbeck	2	Not assessed	0	0	1	0	1	0	0	0	0	1	0	0	0	0	0	0	0	0	0	0	0	0	0	0	0	1	0	0	0	0	0	0	0	0	0	0	0	0	0	0	0	0	0	0
Sapindales	Rutaceae	Citrus sinensis cv. 'Valencia'	(L.) Osbeck	1	NA	0	0	0	0	0	0	0	0	0	0	0	0	0	0	0	0	0	0	0	0	0	0	0	0	0	0	0	0	0	0	0	0	0	0	0	0	0	0	0	0	0	0	0	0
Brassicales	Capparaceae	Cladostemon kirkii	(Oliv.) Pax & Gilg	4	Not assessed	0	0	0	0	0	0	0	0	0	0	0	0	0	0	0	0	0	0	0	0	1	1	0	0	0	0	0	0	0	0	0	0	0	0	0	0	0	0	0	0	0	0	0	0
Sapindales	Rutaceae	Clausena anisata	(Willd.) Hook.f. ex Benth.	5	Not assessed	0	0	0	0	0	0	0	0	0	0	0	0	0	0	0	0	0	0	1	1	1	1	0	0	0	0	0	0	0	0	0	0	0	0	0	0	0	0	0	0	0	0	0	0
Malpighiales	Phyllanthaceae	Cleistanthus schlechteri	(Pax) Hutch.	1	Not assessed	0	0	0	0	0	0	0	0	0	0	0	0	0	0	0	0	0	0	0	0	1	1	0	0	0	0	0	0	0	0	0	0	0	0	0	0	0	0	0	0	0	0	0	0
Lamiales	Lamiaceae	Clerodendrum glabrum	E.Mey.	6	Not assessed	0	0	0	0	0	0	0	0	0	0	0	0	0	0	0	0	0	0	0	0	1	1	0	0	0	0	0	0	0	0	0	0	0	0	0	0	0	0	0	0	0	0	0	0
Lamiales	Lamiaceae	Clerodendrum splendens	G.Don	1	Not assessed	0	0	0	0	0	0	0	0	0	0	0	0	0	0	0	0	0	0	0	1	0	0	0	0	0	0	0	0	0	0	0	0	0	0	0	0	0	0	0	0	0	0	0	0
Lamiales	Lamiaceae	Clerodendrum thomsoniae	Balf.	1	Not assessed	0	0	0	0	0	0	0	0	0	0	0	0	0	0	0	0	0	1	0	1	1	0	0	0	0	0	0	0	0	0	0	0	0	0	0	0	0	0	0	0	0	0	0	0
Lamiales	Lamiaceae	Clerodendrum wallichii	Merr.	1	Not assessed	0	0	0	0	0	0	0	0	0	1	0	0	0	0	0	0	0	0	0	0	0	0	0	0	1	1	0	0	0	0	0	0	0	0	0	0	0	0	0	0	0	0	0	0
Ericales	Clethraceae	Clethra arborea	Aiton	2	Least concern	0	0	0	0	0	0	0	0	0	0	0	0	1	0	0	0	0	0	0	0	0	0	0	0	0	0	0	0	0	0	0	0	0	0	0	0	0	0	0	0	0	0	0	0
Rosales	Rosaceae	Cliffortia cuneata	Aiton	1	Not assessed	0	0	0	0	0	0	0	0	0	0	0	0	0	0	0	0	0	0	0	0	0	1	0	0	0	0	0	0	0	0	0	0	0	0	0	0	0	0	1	0	0	0	0	0
Rosales	Rosaceae	Cliffortia dichotoma	Fellingham	1	Not assessed	0	0	0	0	0	0	0	0	0	0	0	0	0	0	0	0	0	0	0	0	0	0	0	0	0	0	0	0	0	0	0	0	0	0	0	0	0	0	1	0	0	0	0	0
Rosales	Rosaceae	Cliffortia odorata	L.f.	1	Not assessed	0	0	0	0	0	0	0	0	0	0	0	0	0	0	0	0	0	0	0	0	0	1	0	0	0	0	0	0	0	0	0	0	0	0	0	0	0	0	1	0	0	0	0	0
Malpighiales	Clusiaceae	Clusia major	L.	1	Not assessed	0	0	0	0	0	0	0	0	0	0	0	0	0	0	0	0	0	0	0	0	0	0	0	0	0	0	0	0	0	0	0	1	0	0	0	0	0	0	0	0	0	0	0	0
Malpighiales	Clusiaceae	Clusia rosea	Jacq.	1	Not assessed	1	0	1	0	0	0	0	0	0	0	0	0	0	0	0	0	0	0	0	0	0	0	0	0	0	0	0	0	0	0	0	1	1	1	0	0	0	0	0	0	0	0	0	0
Malpighiales	Euphorbiaceae	Clutia pulchella	L.	1	Not assessed	0	0	0	0	0	0	0	0	0	0	0	0	0	0	0	0	0	0	0	0	0	1	0	0	0	0	0	0	0	0	0	0	0	0	0	0	0	0	1	0	0	0	0	0
Caryophyllales	Polygonaceae	Coccoloba latifolia	Poir.	1	Not assessed	0	0	0	0	0	0	0	0	0	0	0	0	0	0	0	0	0	0	0	0	0	0	0	0	0	0	0	0	0	0	0	0	1	1	1	0	0	0	0	0	0	0	0	0
Malvales	Cochlospermaceae	Cochlospermum vitifolium	(Willd.) Spreng.	1	Not assessed	0	0	0	0	0	0	0	0	0	0	0	0	0	0	0	0	0	0	0	0	0	0	0	0	0	0	0	0	0	0	0	1	1	1	1	1	0	0	0	0	0	0	0	0
Arecales	Arecaceae	Cocos nucifera	L.	3	Not assessed	0	0	1	0	0	0	0	0	0	0	0	0	0	0	0	0	0	0	0	0	0	0	0	0	0	0	1	0	0	1	0	0	0	0	0	0	0	0	0	1	0	0	0	0
Gentianales	Rubiaceae	Coddia rudis	(E.Mey. ex Harv.) Verdc.	6	Not assessed	0	0	0	0	0	0	0	0	0	0	0	0	0	0	0	0	0	0	0	0	0	1	0	0	0	0	0	0	0	0	0	0	0	0	0	0	0	0	0	0	0	0	0	0
Malpighiales	Euphorbiaceae	Codiaeum variegatum	(L.) A. Juss.	7	Not assessed	0	0	0	0	0	0	0	0	0	0	0	0	0	0	0	0	0	0	0	0	0	0	0	0	0	0	1	0	0	1	1	0	0	0	0	0	0	0	0	0	0	0	0	0
Malpighiales	Euphorbiaceae	Codieaum variegatum var. pictum cv. 'Gloriosum'	(L.) Rumph. ex A.Juss.	1	NA	0	0	0	0	0	0	0	0	0	0	0	0	0	0	0	0	0	0	0	0	0	0	0	0	0	0	0	0	0	0	0	0	0	0	0	0	0	0	0	0	0	0	0	0
Gentianales	Rubiaceae	Coffea arabica	L.	4	Endangered	1	0	1	0	0	0	0	0	0	0	0	0	0	0	0	0	0	0	1	0	0	0	0	0	0	0	0	0	0	0	0	0	0	0	0	0	0	0	0	0	0	0	0	0
Gentianales	Rubiaceae	Coffea arabica cv. 'Catuai'	L.	1	NA	0	0	0	0	0	0	0	0	0	0	0	0	0	0	0	0	0	0	0	0	0	0	0	0	0	0	0	0	0	0	0	0	0	0	0	0	0	0	0	0	0	0	0	0
Gentianales	Rubiaceae	Coffea canephora	Pierre ex A.Froehner	1	Least concern	0	0	1	0	0	0	0	0	0	0	0	0	0	0	0	0	0	0	0	1	0	0	0	0	0	0	0	0	0	0	0	0	0	0	0	0	0	0	0	0	0	0	0	0
Gentianales	Rubiaceae	Coffea liberica	W.Bull ex Hiern	2	Least concern	0	0	1	0	0	0	0	0	0	0	0	0	0	0	0	0	0	1	0	1	0	0	0	0	0	0	0	0	0	0	0	0	0	0	0	0	0	0	0	0	0	0	0	0
Gentianales	Rubiaceae	Coffea racemosa	Lour.	1	Near threatened	0	0	0	0	0	0	0	0	0	0	0	0	0	0	0	0	0	0	0	0	1	1	0	0	0	0	0	0	0	0	0	0	0	0	0	0	0	0	0	0	0	0	0	0
Malvales	Malvaceae	Cola greenwayi	Brenan	4	Not assessed	0	0	0	0	0	0	0	0	0	0	0	0	0	0	0	0	0	0	0	1	1	1	0	0	0	0	0	0	0	0	0	0	0	0	0	0	0	0	0	0	0	0	0	0
Malvales	Malvaceae	Cola natalensis	Oliv.	1	Near threatened	0	0	0	0	0	0	0	0	0	0	0	0	0	0	0	0	0	0	0	0	0	1	0	0	0	0	0	0	0	0	0	0	0	0	0	0	0	0	0	0	0	0	0	0
Malvales	Sterculiaceae	Cola nitida	(Vent.) Schott & Endl.	1	Least concern	0	0	0	0	0	0	0	0	0	0	0	0	0	0	0	0	0	0	0	1	0	0	0	0	0	0	0	0	0	0	0	0	0	0	0	0	0	0	0	0	0	0	0	0
Sapindales	Rutaceae	Coleonema album	E.Mey.	2	Not assessed	0	0	0	0	0	0	0	0	0	0	0	0	0	0	0	0	0	0	0	0	0	1	0	0	0	0	0	0	0	0	0	0	0	0	0	0	0	0	0	0	0	0	0	0
Sapindales	Rutaceae	Coleonema pulchrum	Hook.	2	Not assessed	0	0	0	0	0	0	0	0	0	0	0	0	0	0	0	0	0	0	0	0	0	0	0	0	0	0	0	0	0	0	0	0	0	0	0	0	0	0	1	0	0	0	0	0
Rosales	Rhamnaceae	Colletia spinosissima	J.F. Gmel.	1	Not assessed	0	0	0	0	0	0	0	0	0	0	0	0	0	0	0	0	0	0	0	0	0	0	0	0	0	0	0	0	0	0	0	0	0	0	1	0	1	0	0	0	0	0	0	0
Fabales	Fabaceae	Colophospermum mopane	(J.Kirk ex Benth.) J.Léonard	3	Not assessed	0	0	0	0	0	0	0	0	0	0	0	0	0	0	0	0	0	0	0	0	1	1	0	0	0	0	0	0	0	0	0	0	0	0	0	0	0	0	0	0	0	0	0	0
Santalales	Santalaceae	Colpoon compressum	P.J. Bergius	2	Not assessed	0	0	0	0	0	0	0	0	0	0	0	0	0	0	0	0	0	0	0	0	0	1	0	0	0	0	0	0	0	0	0	0	0	0	0	0	0	0	0	0	0	0	0	0
Fabales	Fabaceae	Colvillea racemosa	Bojer	3	Least concern	0	0	0	0	0	0	0	0	0	0	0	0	0	0	0	0	0	0	0	0	0	0	1	0	0	0	0	0	0	0	0	0	0	0	0	0	0	0	0	0	0	0	0	0
Myrtales	Combretaceae	Combretum apiculatum	Sond.	4	Not assessed	0	0	0	0	0	0	0	0	0	0	0	0	0	0	0	0	0	0	0	0	1	1	0	0	0	0	0	0	0	0	0	0	0	0	0	0	0	0	0	0	0	0	0	0
Myrtales	Combretaceae	Combretum bracteosum	(Hochst.) Brandis	3	Not assessed	0	0	0	0	0	0	0	0	0	0	0	0	0	0	0	0	0	0	0	0	0	1	0	0	0	0	0	0	0	0	0	0	0	0	0	0	0	0	0	0	0	0	0	0
Myrtales	Combretaceae	Combretum caffrum	(Eckl. & Zeyh.) Kuntze	5	Not assessed	0	0	0	0	0	0	0	0	0	0	0	0	0	0	0	0	0	0	0	0	0	1	0	0	0	0	0	0	0	0	0	0	0	0	0	0	0	0	0	0	0	0	0	0
Myrtales	Combretaceae	Combretum collinum	Fresen.	3	Not assessed	0	0	0	0	0	0	0	0	0	0	0	0	0	0	0	0	0	1	1	1	1	1	0	0	0	0	0	0	0	0	0	0	0	0	0	0	0	0	0	0	0	0	0	0
Myrtales	Combretaceae	Combretum collinum subsp. suluense	(Engl. & Diels) Okafor	2	Not assessed	0	0	0	0	0	0	0	0	0	0	0	0	0	0	0	0	0	1	1	1	1	1	0	0	0	0	0	0	0	0	0	0	0	0	0	0	0	0	0	0	0	0	0	0
Myrtales	Combretaceae	Combretum erythrophyllum	(Burch.) Sond.	29	Not assessed	0	0	0	0	1	1	0	0	0	0	0	0	0	0	0	0	0	0	0	0	1	1	0	0	0	0	0	0	0	0	0	0	0	0	0	0	0	0	0	0	0	0	0	0
Myrtales	Combretaceae	Combretum hereroense	Schinz	3	Least concern	0	0	0	0	0	0	0	0	0	0	0	0	0	0	0	0	0	0	0	0	1	1	0	0	0	0	0	0	0	0	0	0	0	0	0	0	0	0	0	0	0	0	0	0
Myrtales	Combretaceae	Combretum imberbe	Hochst.	4	Not assessed	0	0	0	0	0	0	0	0	0	0	0	0	0	0	0	0	0	0	0	0	1	1	0	0	0	0	0	0	0	0	0	0	0	0	0	0	0	0	0	0	0	0	0	0
Myrtales	Combretaceae	Combretum kraussii	Hochst.	8	Not assessed	0	0	0	0	1	1	0	0	0	0	0	0	0	0	0	0	0	0	0	0	0	1	0	0	0	0	0	0	0	0	0	0	0	0	0	0	0	0	0	0	0	0	0	0
Myrtales	Combretaceae	Combretum microphyllum	Klotzsch	4	Not assessed	0	0	0	0	0	0	0	0	0	0	0	0	0	0	0	0	0	0	0	0	1	1	0	0	0	0	0	0	0	0	0	0	0	0	0	0	0	0	0	0	0	0	0	0
Myrtales	Combretaceae	Combretum mkuzense	JD. Carr & Retief	1	Near threatened	0	0	0	0	0	0	0	0	0	0	0	0	0	0	0	0	0	0	0	0	0	1	0	0	0	0	0	0	0	0	0	0	0	0	0	0	0	0	0	0	0	0	0	0
Myrtales	Combretaceae	Combretum moggii	Exell	1	Not assessed	0	0	0	0	0	0	0	0	0	0	0	0	0	0	0	0	0	0	0	0	0	1	0	0	0	0	0	0	0	0	0	0	0	0	0	0	0	0	0	0	0	0	0	0
Myrtales	Combretaceae	Combretum molle	R.Br ex G.Don	10	Not assessed	0	0	0	0	0	0	0	0	0	0	0	0	0	0	0	0	1	0	1	1	1	1	0	0	0	0	0	0	0	0	0	0	0	0	0	0	0	0	0	0	0	0	0	0
Myrtales	Combretaceae	Combretum padoides	Engl. & Diels	3	Not assessed	0	0	0	0	0	0	0	0	0	0	0	0	0	0	0	0	0	0	1	1	1	1	0	0	0	0	0	0	0	0	0	0	0	0	0	0	0	0	0	0	0	0	0	0
Myrtales	Combretaceae	Combretum petrophilum	Retief	1	Near threatened	0	0	0	0	0	0	0	0	0	0	0	0	0	0	0	0	0	0	0	0	0	1	0	0	0	0	0	0	0	0	0	0	0	0	0	0	0	0	0	0	0	0	0	0
Myrtales	Combretaceae	Combretum vendae	A.E. van Wyk	2	Not assessed	0	0	0	0	0	0	0	0	0	0	0	0	0	0	0	0	0	0	0	0	0	1	0	0	0	0	0	0	0	0	0	0	0	0	0	0	0	0	0	0	0	0	0	0
Myrtales	Combretaceae	Combretum wattii	Exell	1	Least concern	0	0	0	0	0	0	0	0	0	0	0	0	0	0	0	0	0	0	0	0	0	1	0	0	0	0	0	0	0	0	0	0	0	0	0	0	0	0	0	0	0	0	0	0
Myrtales	Combretaceae	Combretum woodii	Dümmer	1	Least concern	0	0	0	0	0	0	0	0	0	0	0	0	0	0	0	0	0	0	0	0	0	1	0	0	0	0	0	0	0	0	0	0	0	0	0	0	0	0	0	0	0	0	0	0
Myrtales	Combretaceae	Combretum zeyheri	Sond.	4	Least concern	0	0	0	0	0	0	0	0	0	0	0	0	0	0	0	0	0	0	0	1	1	1	0	0	0	0	0	0	0	0	0	0	0	0	0	0	0	0	0	0	0	0	0	0
Sapindales	Burseraceae	Commiphora africana	(A.Rich.) Engl.	3	Not assessed	0	0	0	0	0	0	0	0	0	0	0	0	0	0	0	0	0	1	1	1	1	1	0	0	0	0	0	0	0	0	0	0	0	0	0	0	0	0	0	0	0	0	0	0
Sapindales	Burseraceae	Commiphora angolensis	Engl.	1	Least concern	0	0	0	0	0	0	0	0	0	0	0	0	0	0	0	0	0	0	0	0	1	1	0	0	0	0	0	0	0	0	0	0	0	0	0	0	0	0	0	0	0	0	0	0
Sapindales	Burseraceae	Commiphora capensis	Engl.	1	Not assessed	0	0	0	0	0	0	0	0	0	0	0	0	0	0	0	0	0	0	0	0	0	1	0	0	0	0	0	0	0	0	0	0	0	0	0	0	0	0	0	0	0	0	0	0
Sapindales	Burseraceae	Commiphora crenato-serrata	Engl.	1	Not assessed	0	0	0	0	0	0	0	0	0	0	0	0	0	0	0	0	0	0	0	0	0	1	0	0	0	0	0	0	0	0	0	0	0	0	0	0	0	0	0	0	0	0	0	0
Sapindales	Burseraceae	Commiphora dulcis	Engl.	1	Not assessed	0	0	0	0	0	0	0	0	0	0	0	0	0	0	0	0	0	0	0	0	0	1	0	0	0	0	0	0	0	0	0	0	0	0	0	0	0	0	0	0	0	0	0	0
Sapindales	Burseraceae	Commiphora edulis	(Klotzsch) Engl.	2	Not assessed	0	0	0	0	0	0	0	0	0	0	0	0	0	0	0	0	0	0	1	0	1	1	0	0	0	0	0	0	0	0	0	0	0	0	0	0	0	0	0	0	0	0	0	0
Sapindales	Burseraceae	Commiphora glandulosa	Schinz	1	Least concern	0	0	0	0	0	0	0	0	0	0	0	0	0	0	0	0	0	0	0	0	0	1	0	0	0	0	0	0	0	0	0	0	0	0	0	0	0	0	0	0	0	0	0	0
Sapindales	Burseraceae	Commiphora glaucescens	Engl.	2	Least concern	0	0	0	0	0	0	0	0	0	0	0	0	0	0	0	0	0	0	0	0	1	1	0	0	0	0	0	0	0	0	0	0	0	0	0	0	0	0	0	0	0	0	0	0
Sapindales	Burseraceae	Commiphora harveyi	(Engl.) Engl.	9	Not assessed	0	0	0	0	0	0	0	0	0	0	0	0	0	0	0	0	0	0	0	0	0	1	0	0	0	0	0	0	0	0	0	0	0	0	0	0	0	0	0	0	0	0	0	0
Sapindales	Burseraceae	Commiphora kua	(R.Br. ex Royle) Vollesen	1	Not assessed	0	0	0	0	0	0	0	0	0	0	0	0	0	0	0	0	1	0	1	0	1	0	0	0	0	0	0	0	0	0	0	0	0	0	0	0	0	0	0	0	0	0	0	0
Sapindales	Burseraceae	Commiphora madagascariensis	Jacq.	1	Not assessed	0	0	0	0	0	0	0	0	0	0	0	0	0	0	0	0	0	0	0	0	1	0	0	0	0	0	0	0	0	0	0	0	0	0	0	0	0	0	0	0	0	0	0	0
Sapindales	Burseraceae	Commiphora marlothii	Engl.	4	Least concern	0	0	0	0	0	0	0	0	0	0	0	0	0	0	0	0	0	0	0	0	0	1	0	0	0	0	0	0	0	0	0	0	0	0	0	0	0	0	0	0	0	0	0	0
Sapindales	Burseraceae	Commiphora mollis	(Oliv.) Engl.	4	Least concern	0	0	0	0	0	0	0	0	0	0	0	0	0	0	0	0	0	0	0	1	1	1	0	0	0	0	0	0	0	0	0	0	0	0	0	0	0	0	0	0	0	0	0	0
Sapindales	Burseraceae	Commiphora multijuga	K.Schum.	1	Not assessed	0	0	0	0	0	0	0	0	0	0	0	0	0	0	0	0	0	0	0	0	0	1	0	0	0	0	0	0	0	0	0	0	0	0	0	0	0	0	0	0	0	0	0	0
Sapindales	Burseraceae	Commiphora neglecta	Verdc.	4	Not assessed	0	0	0	0	0	0	0	0	0	0	0	0	0	0	0	0	0	0	0	0	0	1	0	0	0	0	0	0	0	0	0	0	0	0	0	0	0	0	0	0	0	0	0	0
Sapindales	Burseraceae	Commiphora pyracanthoides	Engl.	1	Least concern	0	0	0	0	0	0	0	0	0	0	0	0	0	0	0	0	0	0	0	0	0	1	0	0	0	0	0	0	0	0	0	0	0	0	0	0	0	0	0	0	0	0	0	0
Sapindales	Burseraceae	Commiphora schimperi	(O.Berg.) Engl.	3	Not assessed	0	0	0	0	0	0	0	0	0	0	0	0	0	0	0	0	0	0	1	0	1	1	0	0	0	0	0	0	0	0	0	0	0	0	0	0	0	0	0	0	0	0	0	0
Sapindales	Burseraceae	Commiphora tenuipetiolata	Engl.	3	Not assessed	0	0	0	0	0	0	0	0	0	0	0	0	0	0	0	0	0	0	0	0	1	1	0	0	0	0	0	0	0	0	0	0	0	0	0	0	0	0	0	0	0	0	0	0
Sapindales	Burseraceae	Commiphora ugogensis	Engl.	1	Least concern	0	0	0	0	0	0	0	0	0	0	0	0	0	0	0	0	0	0	0	1	1	0	0	0	0	0	0	0	0	0	0	0	0	0	0	0	0	0	0	0	0	0	0	0
Sapindales	Burseraceae	Commiphora viminea	Burtt Davy	1	Least concern	0	0	0	0	0	0	0	0	0	0	0	0	0	0	0	0	0	0	0	0	0	1	0	0	0	0	0	0	0	0	0	0	0	0	0	0	0	0	0	0	0	0	0	0
Sapindales	Burseraceae	Commiphora wightii	(Arn.) Bhandari	1	Critically endangered	0	0	0	0	0	0	0	0	0	0	0	0	0	0	0	0	1	0	0	0	0	0	0	0	1	0	0	0	0	0	0	0	0	0	0	0	0	0	0	0	0	0	0	0
Sapindales	Burseraceae	Commiphora wildii	Merxm.	1	Not assessed	0	0	0	0	0	0	0	0	0	0	0	0	0	0	0	0	0	0	0	0	0	1	0	0	0	0	0	0	0	0	0	0	0	0	0	0	0	0	0	0	0	0	0	0
Sapindales	Burseraceae	Commiphora woodii	Engl.	3	Not assessed	0	0	0	0	0	0	0	0	0	0	0	0	0	0	0	0	0	0	0	0	0	1	0	0	0	0	0	0	0	0	0	0	0	0	0	0	0	0	0	0	0	0	0	0
Myrtales	Combretaceae	Conocarpus erectus	L.	1	Least concern	0	0	0	0	0	0	0	0	0	0	0	0	0	0	0	0	0	0	0	1	0	0	0	0	0	0	0	0	0	0	0	1	1	0	0	0	0	0	0	0	0	0	0	0
Arecales	Arecaceae	Copernicia prunifera	(Mill.) H.E.Moore	2	Not assessed	0	0	0	0	0	0	0	0	0	0	0	0	0	0	0	0	0	0	0	0	0	0	0	0	0	0	0	0	0	0	0	0	0	0	1	0	0	0	0	0	0	0	0	0
Gentianales	Rubiaceae	Coprosma baueri	Endl.	2	Not assessed	0	0	0	0	0	0	0	0	0	0	0	0	0	0	0	0	0	0	0	0	0	0	0	0	0	0	0	0	1	0	0	0	0	0	0	0	0	0	0	0	0	0	0	0
Gentianales	Rubiaceae	Coprosma repens	A. Rich.	1	Not assessed	1	1	1	0	0	0	0	0	0	0	0	0	0	0	0	0	0	0	0	0	0	0	0	0	0	0	0	0	0	0	0	0	0	0	0	0	0	0	0	0	0	0	1	0
Gentianales	Rubiaceae	Coprosma repens cv. 'Coffee Cream'	A. Rich.	1	NA	0	0	0	0	0	0	0	0	0	0	0	0	0	0	0	0	0	0	0	0	0	0	0	0	0	0	0	0	0	0	0	0	0	0	0	0	0	0	0	0	0	0	0	0
Gentianales	Rubiaceae	Coprosma repens cv. 'Marginata'	A. Rich.	1	NA	0	0	0	0	0	0	0	0	0	0	0	0	0	0	0	0	0	0	0	0	0	0	0	0	0	0	0	0	0	0	0	0	0	0	0	0	0	0	0	0	0	0	0	0
Gentianales	Rubiaceae	Coprosma repens cv. 'Picturata'	A. Rich.	1	NA	0	0	0	0	0	0	0	0	0	0	0	0	0	0	0	0	0	0	0	0	0	0	0	0	0	0	0	0	0	0	0	0	0	0	0	0	0	0	0	0	0	0	0	0
Gentianales	Rubiaceae	Coptospermum rhodesiacum	(Bremek.) Degreef	1	Not assessed	0	0	0	0	0	0	0	0	0	0	0	0	0	0	0	0	0	0	0	0	0	1	0	0	0	0	0	0	0	0	0	0	0	0	0	0	0	0	0	0	0	0	0	0
Lamiales	Cordiaceae	Cordia africana	Lam.	2	Not assessed	0	0	0	0	0	0	0	0	0	0	0	0	0	0	0	0	0	0	1	1	1	1	0	0	0	0	0	0	0	0	0	0	0	0	0	0	0	0	0	0	0	0	0	0
Lamiales	Cordiaceae	Cordia caffra	Sond.	5	Not assessed	0	0	0	0	1	0	0	0	0	0	0	0	0	0	0	0	0	0	0	0	1	1	0	0	0	0	0	0	0	0	0	0	0	0	0	0	0	0	0	0	0	0	0	0
Lamiales	Cordiaceae	Cordia decandra	Hook. & Arn.	1	Not assessed	0	0	0	0	0	0	0	0	0	0	0	0	0	0	0	0	0	0	0	0	0	0	0	0	0	0	0	0	0	0	0	0	0	0	0	1	0	0	0	0	0	0	0	0
Lamiales	Cordiaceae	Cordia dodecandra	DC.	1	Not assessed	0	0	0	0	0	0	0	0	0	0	0	0	0	0	0	0	0	0	0	0	0	0	0	0	0	0	0	0	0	0	0	1	0	0	0	0	0	0	0	0	0	0	0	0
Lamiales	Cordiaceae	Cordia grandicalyx	Oberm.	1	Not assessed	0	0	0	0	0	0	0	0	0	0	0	0	0	0	0	0	0	0	0	0	0	1	0	0	0	0	0	0	0	0	0	0	0	0	0	0	0	0	0	0	0	0	0	0
Lamiales	Cordiaceae	Cordia myxa	L.	1	Not assessed	0	0	0	0	0	0	0	0	0	0	0	0	0	0	0	0	0	0	0	0	0	0	0	0	1	0	0	0	0	0	0	0	0	0	0	0	0	0	0	0	0	0	0	0
Lamiales	Cordiaceae	Cordia ovalis	R.Br. ex DC.	1	Not assessed	0	0	0	0	0	0	0	0	0	0	0	0	0	0	0	0	0	0	0	0	0	1	0	0	0	0	0	0	0	0	0	0	0	0	0	0	0	0	0	0	0	0	0	0
Lamiales	Cordiaceae	Cordia sebestena	L.	1	Least concern	0	0	0	0	0	0	0	0	0	0	0	0	0	0	0	0	0	0	0	0	0	0	0	0	0	0	0	0	0	0	0	1	0	0	0	0	0	0	0	0	0	0	0	0
Lamiales	Cordiaceae	Cordia superba	Cham.	1	Least concern	0	0	0	0	0	0	0	0	0	0	0	0	0	0	0	0	0	0	0	0	0	0	0	0	0	0	0	0	0	0	0	0	0	0	1	0	0	0	0	0	0	0	0	0
Fabales	Fabaceae	Cordyla africana	Lour.	5	Least concern	0	0	0	0	0	0	0	0	0	0	0	0	0	0	0	0	0	0	0	0	1	1	0	0	0	0	0	0	0	0	0	0	0	0	0	0	0	0	0	0	0	0	0	0
Asparagales	Asparagaceae	Cordyline australis	Hook.f.	8	Not assessed	0	0	0	0	0	0	0	0	0	0	0	0	0	0	0	0	0	0	0	0	0	0	0	0	0	0	0	0	0	0	0	0	0	0	0	0	0	0	0	0	0	0	1	0
Asparagales	Asparagaceae	Cordyline australis cv. 'Atropurpurea'	Hook.f.	4	NA	0	0	0	0	0	0	0	0	0	0	0	0	0	0	0	0	0	0	0	0	0	0	0	0	0	0	0	0	0	0	0	0	0	0	0	0	0	0	0	0	0	0	0	0
Asparagales	Asparagaceae	Cordyline fruticosa	(L.) A.Chev.	1	Least concern	0	0	0	0	0	0	0	0	0	0	0	0	0	0	0	0	0	0	0	0	0	0	0	0	0	0	1	0	0	0	1	0	0	0	0	0	0	0	0	1	0	0	0	0
Cornales	Cornaceae	Cornus amomum subsp. obliqua	Mill.	1	Not assessed	0	0	0	0	0	0	0	0	0	0	0	0	0	1	1	0	0	0	0	0	0	0	0	0	0	0	0	0	0	0	0	0	0	0	0	0	0	0	0	0	0	0	0	0
Cornales	Cornaceae	Cornus florida	L.	6	Not assessed	1	0	0	0	0	0	0	0	0	0	0	0	0	1	1	0	0	0	0	0	0	0	0	0	0	0	0	0	0	0	0	0	0	0	0	0	0	0	0	0	0	0	0	0
Cornales	Cornaceae	Cornus mas	L.	1	Least concern	0	0	0	0	0	0	0	1	1	0	1	1	0	0	0	0	0	0	0	0	0	0	0	0	0	0	0	0	0	0	0	0	0	0	0	0	0	0	0	0	0	0	0	0
Cornales	Cornaceae	Cornus nuttalii	Audubon	1	Least concern	0	0	0	0	0	0	0	0	0	0	0	0	0	0	0	1	0	0	0	0	0	0	0	0	0	0	0	0	0	0	0	0	0	0	0	0	0	0	0	0	0	0	0	0
Cornales	Cornaceae	Cornus officinalis	Siebold & Zucc.	1	Not assessed	0	0	0	0	0	0	0	0	0	1	0	0	0	0	0	0	0	0	0	0	0	0	0	0	0	0	0	0	0	0	0	0	0	0	0	0	0	0	0	0	0	0	0	0
Cornales	Cornaceae	Cornus sanguinea	L.	1	Not assessed	0	0	0	0	0	0	0	1	0	0	0	1	0	0	0	0	0	0	0	0	0	0	0	0	0	0	0	0	0	0	0	0	0	0	0	0	0	0	0	0	0	0	0	0
Fagales	Betulaceae	Corylus avellana	L.	2	Least concern	0	0	0	0	0	0	0	1	1	0	0	1	0	0	0	0	0	0	0	0	0	0	0	0	0	0	0	0	0	0	0	0	0	0	0	0	0	0	0	0	0	0	0	0
Myrtales	Myrtaceae	Corymbia calophylla	(Lindl.) K.D.Hill & L.A.S.Johnson	3	Not assessed	0	0	0	0	0	0	0	0	0	0	0	0	0	0	0	0	0	0	0	0	0	0	0	0	0	0	0	0	0	0	0	0	0	0	0	0	0	0	0	0	1	0	0	0
Myrtales	Myrtaceae	Corymbia citriodora	(Hook.) K.D.Hill & L.A.S.Johnson	1	Not assessed	0	0	1	0	0	0	0	0	0	0	0	0	0	0	0	0	0	0	0	0	0	0	0	0	0	0	0	0	0	0	0	0	0	0	0	0	0	0	0	0	1	0	0	0
Myrtales	Myrtaceae	Corymbia ficifolia	(F.Muell.) K.D.Hill & L.A.S.Johnson	13	Not assessed	1	0	0	0	1	0	0	0	0	0	0	0	0	0	0	0	0	0	0	0	0	0	0	0	0	0	0	0	0	0	0	0	0	0	0	0	0	0	0	0	1	0	0	0
Myrtales	Myrtaceae	Corymbia maculata	(Hook.) K.D.Hill & L.A.S.Johnson	7	Not assessed	0	0	0	0	0	0	0	0	0	0	0	0	0	0	0	0	0	0	0	0	0	0	0	0	0	0	0	0	0	0	0	0	0	0	0	0	0	0	0	1	0	0	0	0
Cucurbitales	Corynocarpaceae	Corynocarpus laevigatus	J.R.Forst. & G.Forst.	3	Not assessed	0	0	1	0	0	0	0	0	0	0	0	0	0	0	0	0	0	0	0	0	0	0	0	0	0	0	0	0	0	0	0	0	0	0	0	0	0	0	0	0	0	0	1	0
Arecales	Arecaceae	Corypha utan	Lam.	1	Least concern	0	0	0	0	0	0	0	0	0	0	0	0	0	0	0	0	0	0	0	0	0	0	0	0	0	1	1	0	0	0	0	0	0	0	0	0	0	0	0	1	0	0	0	0
Sapindales	Anacardiaceae	Cotinus coggygria	Scop.	1	Least concern	0	0	0	1	0	0	0	1	0	0	1	1	0	0	0	0	0	0	0	0	0	0	0	0	0	0	0	0	0	0	0	0	0	0	0	0	0	0	0	0	0	0	0	0
Rosales	Rosaceae	Cotoneaster × watereri	Exell	1	NA	0	0	0	0	0	0	0	0	0	0	0	0	0	0	0	0	0	0	0	0	0	0	0	0	0	0	0	0	0	0	0	0	0	0	0	0	0	0	0	0	0	0	0	0
Rosales	Rosaceae	Cotoneaster franchetii	Bois	3	Not assessed	1	0	1	0	0	0	0	0	0	1	0	0	0	0	0	0	0	0	0	0	0	0	0	0	0	0	0	0	0	0	0	0	0	0	0	0	0	0	0	0	0	0	0	0
Rosales	Rosaceae	Cotoneaster frigidus	Wall. ex Lindl.	1	Not assessed	0	0	0	0	0	0	0	0	0	1	0	0	0	0	0	0	0	0	0	0	0	0	0	0	0	0	0	0	0	0	0	0	0	0	0	0	0	0	0	0	0	0	0	0
Rosales	Rosaceae	Cotoneaster glaucophyllus var. serotinus	(Hutch.) L.T.Lu & Brach	1	Not assessed	0	0	0	0	0	0	0	0	0	1	0	0	0	0	0	0	0	0	0	0	0	0	0	0	0	0	0	0	0	0	0	0	0	0	0	0	0	0	0	0	0	0	0	0
Rosales	Rosaceae	Cotoneaster horizontalis	Decne.	3	Not assessed	0	0	1	0	0	0	0	0	0	1	0	0	0	0	0	0	0	0	0	0	0	0	0	0	0	0	0	0	0	0	0	0	0	0	0	0	0	0	0	0	0	0	0	0
Rosales	Rosaceae	Cotoneaster lacteus	W.W.Smith	1	Not assessed	0	0	1	0	0	0	0	0	0	1	0	0	0	0	0	0	0	0	0	0	0	0	0	0	0	0	0	0	0	0	0	0	0	0	0	0	0	0	0	0	0	0	0	0
Rosales	Rosaceae	Cotoneaster pannosus	Franch.	1	Not assessed	1	1	1	0	0	0	0	0	0	1	0	0	0	0	0	0	0	0	0	0	0	0	0	0	0	0	0	0	0	0	0	0	0	0	0	0	0	0	0	0	0	0	0	0
Rosales	Rosaceae	Cotoneaster salicifolius	Franch.	1	Not assessed	0	0	1	0	0	0	0	0	0	1	0	0	0	0	0	0	0	0	0	0	0	0	0	0	0	0	0	0	0	0	0	0	0	0	0	0	0	0	0	0	0	0	0	0
Ericales	Lecythidaceae	Couroupita guianensis	Aubl.	3	Least concern	0	0	0	0	0	0	0	0	0	0	0	0	0	0	0	0	0	0	0	0	0	0	0	0	0	0	0	0	0	0	0	1	1	1	0	0	0	0	0	0	0	0	0	0
Fabales	Fabaceae	Craibia zimmermannii	(Harms) Dunn	4	Not assessed	0	0	0	0	0	0	0	0	0	0	0	0	0	0	0	0	0	0	0	0	1	1	0	0	0	0	0	0	0	0	0	0	0	0	0	0	0	0	0	0	0	0	0	0
Saxifragales	Crassulaceae	Crassula arborescens	(Mill.) Willd.	1	Not assessed	0	0	0	0	0	0	0	0	0	0	0	0	0	0	0	0	0	0	0	0	0	0	0	0	0	0	0	0	0	0	0	0	0	0	0	0	0	0	1	0	0	0	0	0
Rosales	Rosaceae	Crataegus × lavallei	Herincq ex Lavallée	1	NA	1	0	0	0	0	0	0	0	0	0	0	0	0	0	0	0	0	0	0	0	0	0	0	0	0	0	0	0	0	0	0	0	0	0	0	0	0	0	0	0	0	0	0	0
Rosales	Rosaceae	Crataegus collina var. lettermanii	(Sarg.) Eggl.	1	Not assessed	0	0	0	0	0	0	0	0	0	0	0	0	0	1	1	0	0	0	0	0	0	0	0	0	0	0	0	0	0	0	0	0	0	0	0	0	0	0	0	0	0	0	0	0
Rosales	Rosaceae	Crataegus crus-galli	L.	1	Least concern	0	0	0	0	0	0	0	0	0	0	0	0	0	1	1	0	0	0	0	0	0	0	0	0	0	0	0	0	0	0	0	0	0	0	0	0	0	0	0	0	0	0	0	0
Rosales	Rosaceae	Crataegus curvisepala	Lindm.	1	Not assessed	0	0	0	0	0	0	0	1	0	0	0	0	0	0	0	0	0	0	0	0	0	0	0	0	0	0	0	0	0	0	0	0	0	0	0	0	0	0	0	0	0	0	0	0
Rosales	Rosaceae	Crataegus laevigata	(Poir.) DC.	1	Least concern	0	0	0	0	0	0	0	1	0	0	0	0	0	0	0	0	0	0	0	0	0	0	0	0	0	0	0	0	0	0	0	0	0	0	0	0	0	0	0	0	0	0	0	0
Rosales	Rosaceae	Crataegus monogyna	Jacq.	2	Not assessed	1	1	1	0	0	0	0	1	0	0	0	1	0	0	0	0	0	0	0	0	0	0	0	0	0	0	0	0	0	0	0	0	0	0	0	0	0	0	0	0	0	0	0	0
Rosales	Rosaceae	Crataegus phaenopyrum	(L.f.) Medik.	1	Least concern	0	0	0	0	0	0	0	0	0	0	0	0	0	0	1	0	0	0	0	0	0	0	0	0	0	0	0	0	0	0	0	0	0	0	0	0	0	0	0	0	0	0	0	0
Rosales	Rosaceae	Crataegus pubescens	(C. Presl.) C. Presl.	3	Not assessed	0	0	0	0	0	0	0	0	0	0	0	0	0	0	0	0	0	0	0	0	0	0	0	0	0	0	0	0	0	0	0	1	0	0	0	0	0	0	0	0	0	0	0	0
Rosales	Rosaceae	Crataegus x lavallei	Hérincq	1	NA	1	0	0	0	0	0	0	0	0	0	0	0	0	0	0	0	0	0	0	0	0	0	0	0	0	0	0	0	0	0	0	0	0	0	0	0	0	0	0	0	0	0	0	0
Lamiales	Bignoniaceae	Crescentia cujete	L.	1	Not assessed	0	0	0	0	0	0	0	0	0	0	0	0	0	0	0	0	0	0	0	0	0	0	0	0	0	0	0	0	0	0	0	1	0	0	0	0	0	0	0	0	0	0	0	0
Gentianales	Rubiaceae	Crossopteryx febrifuga	(Afzel. ex G.Don) Benth.	1	Least concern	0	0	0	0	0	0	0	0	0	0	0	0	0	0	0	0	0	1	1	1	1	1	0	0	0	0	0	0	0	0	0	0	0	0	0	0	0	0	0	0	0	0	0	0
Fabales	Fabaceae	Crotalaria agatiflora	Jacq.	1	Least concern	1	0	0	0	0	0	0	0	0	0	0	0	0	0	0	0	0	0	0	0	1	0	0	0	0	0	0	0	0	0	0	0	0	0	0	0	0	0	0	0	0	0	0	0
Fabales	Fabaceae	Crotalaria capensis	Jacq.	4	Not assessed	0	0	0	0	0	0	0	0	0	0	0	0	0	0	0	0	0	0	0	0	0	1	0	0	0	0	0	0	0	0	0	0	0	0	0	0	0	0	0	0	0	0	0	0
Malpighiales	Euphorbiaceae	Croton gratissimus	Burch.	8	Not assessed	0	0	0	0	0	0	0	0	0	0	0	0	0	0	0	0	0	0	0	0	1	1	0	0	0	0	0	0	0	0	0	0	0	0	0	0	0	0	0	0	0	0	0	0
Malpighiales	Euphorbiaceae	Croton megalobotrys	Müll. Arg.	2	Least concern	0	0	0	0	0	0	0	0	0	0	0	0	0	0	0	0	0	0	0	0	1	1	0	0	0	0	0	0	0	0	0	0	0	0	0	0	0	0	0	0	0	0	0	0
Malpighiales	Euphorbiaceae	Croton pseudopulchellus	Pax	1	Not assessed	0	0	0	0	0	0	0	0	0	0	0	0	0	0	0	0	0	0	0	1	1	1	0	0	0	0	0	0	0	0	0	0	0	0	0	0	0	0	0	0	0	0	0	0
Malpighiales	Euphorbiaceae	Croton steenkampianus	Gerstner	1	Not assessed	0	0	0	0	0	0	0	0	0	0	0	0	0	0	0	0	0	0	0	0	0	1	0	0	0	0	0	0	0	0	0	0	0	0	0	0	0	0	0	0	0	0	0	0
Malpighiales	Euphorbiaceae	Croton sylvaticus	Hochst.	12	Not assessed	0	0	0	0	0	0	0	0	0	0	0	0	0	0	0	0	0	0	0	0	0	1	0	0	0	0	0	0	0	0	0	0	0	0	0	0	0	0	0	0	0	0	0	0
Laurales	Lauraceae	Cryptocarya latifolia	Sond.	7	Not assessed	0	0	0	0	0	0	0	0	0	0	0	0	0	0	0	0	0	0	0	0	0	1	0	0	0	0	0	0	0	0	0	0	0	0	0	0	0	0	0	0	0	0	0	0
Laurales	Lauraceae	Cryptocarya liebertiana	Engl.	3	Not assessed	0	0	0	0	0	0	0	0	0	0	0	0	0	0	0	0	0	0	0	1	1	1	0	0	0	0	0	0	0	0	0	0	0	0	0	0	0	0	0	0	0	0	0	0
Laurales	Lauraceae	Cryptocarya myrtifolia	Stapf	2	Not assessed	0	0	0	0	0	0	0	0	0	0	0	0	0	0	0	0	0	0	0	0	0	1	0	0	0	0	0	0	0	0	0	0	0	0	0	0	0	0	0	0	0	0	0	0
Laurales	Lauraceae	Cryptocarya woodii	Engl.	8	Not assessed	0	0	0	0	0	0	0	0	0	0	0	0	0	0	0	0	0	0	0	0	0	1	0	0	0	0	0	0	0	0	0	0	0	0	0	0	0	0	0	0	0	0	0	0
Laurales	Lauraceae	Cryptocarya wyliei	Stapf	2	Not assessed	0	0	0	0	0	0	0	0	0	0	0	0	0	0	0	0	0	0	0	0	0	1	0	0	0	0	0	0	0	0	0	0	0	0	0	0	0	0	0	0	0	0	0	0
Cupressales	Cupressaceae	Cryptomeria japonica	(Thunb. ex L.f.) D.Don	14	Near threatened	1	0	1	0	0	0	0	0	0	1	0	0	0	0	0	0	0	0	0	0	0	0	0	0	0	0	0	0	0	0	0	0	0	0	0	0	0	0	0	0	0	0	0	0
Cupressales	Cupressaceae	Cunninghamia lanceolata	(Lamb.) Hook.	7	Not assessed	0	0	0	0	0	0	0	0	0	1	1	0	0	0	0	0	0	0	0	0	0	0	0	0	0	0	0	0	0	0	0	0	0	0	0	0	0	0	0	0	0	0	0	0
Oxalidales	Cunoniaceae	Cunonia capensis	L.	12	Not assessed	0	0	0	0	1	0	0	0	0	0	0	0	0	0	0	0	0	0	0	0	0	1	0	0	0	0	0	0	0	0	0	0	0	0	0	0	0	0	0	0	0	0	0	0
Cupressales	Cupressaceae	Cupressus arizonica	Greene	5	Least concern	1	0	0	0	0	0	0	0	0	0	0	0	0	0	0	1	0	0	0	0	0	0	0	0	0	0	0	0	0	0	0	0	0	0	0	0	0	0	0	0	0	0	0	0
Cupressales	Cupressaceae	Cupressus arizonica cv. 'Glauca'	Greene	1	Least concern	0	0	0	0	0	0	0	0	0	0	0	0	0	0	0	0	0	0	0	0	0	0	0	0	0	0	0	0	0	0	0	0	0	0	0	0	0	0	0	0	0	0	0	0
Cupressales	Cupressaceae	Cupressus arizonica var. glabra	(Sudw.) Little	3	Near threatened	0	0	0	0	0	0	0	0	0	0	0	0	0	0	0	1	0	0	0	0	0	0	0	0	0	0	0	0	0	0	0	0	0	0	0	0	0	0	0	0	0	0	0	0
Cupressales	Cupressaceae	Cupressus bakeri	Jeps.	1	Vulnerable	0	0	0	0	0	0	0	0	0	0	0	0	0	0	0	1	0	0	0	0	0	0	0	0	0	0	0	0	0	0	0	0	0	0	0	0	0	0	0	0	0	0	0	0
Cupressales	Cupressaceae	Cupressus funebris	Endl.	6	Data deficient	0	0	0	0	0	0	0	0	0	1	0	0	0	0	0	0	0	0	0	0	0	0	0	0	0	0	0	0	0	0	0	0	0	0	0	0	0	0	0	0	0	0	0	0
Cupressales	Cupressaceae	Cupressus goveniana	Gordon	1	Endangered	0	0	0	0	0	0	0	0	0	0	0	0	0	0	0	1	0	0	0	0	0	0	0	0	0	0	0	0	0	0	0	0	0	0	0	0	0	0	0	0	0	0	0	0
Cupressales	Cupressaceae	Cupressus lusitanica	Mill.	16	Least concern	1	0	1	0	0	0	0	0	0	0	0	0	0	0	0	0	0	0	0	0	0	0	0	0	0	0	0	0	0	0	0	1	0	0	0	0	0	0	0	0	0	0	0	0
Cupressales	Cupressaceae	Cupressus lusitanica var. benthamii	(Endl.) Carrière	2	Near threatened	0	0	0	0	0	0	0	0	0	0	0	0	0	0	0	0	0	0	0	0	0	0	0	0	0	0	0	0	0	0	0	1	0	0	0	0	0	0	0	0	0	0	0	0
Cupressales	Cupressaceae	Cupressus macrocarpa	Hartw. & Gordon	8	Vulnerable	0	0	0	0	0	0	0	0	0	0	0	0	0	0	0	1	0	0	0	0	0	0	0	0	0	0	0	0	0	0	0	0	0	0	0	0	0	0	0	0	0	0	0	0
Cupressales	Cupressaceae	Cupressus macrocarpa cv. 'Gold Crest'	Hartw. & Gordon	1	NA	0	0	0	0	0	0	0	0	0	0	0	0	0	0	0	0	0	0	0	0	0	0	0	0	0	0	0	0	0	0	0	0	0	0	0	0	0	0	0	0	0	0	0	0
Cupressales	Cupressaceae	Cupressus sempervirens	L.	21	Least concern	0	0	0	0	0	0	0	0	0	0	0	1	0	0	0	0	0	0	0	0	0	0	0	0	0	0	0	0	0	0	0	0	0	0	0	0	0	0	0	0	0	0	0	0
Cupressales	Cupressaceae	Cupressus sempervirens cv. 'Stricta'	L.	2	NA	0	0	0	0	0	0	0	0	0	0	0	0	0	0	0	0	0	0	0	0	0	0	0	0	0	0	0	0	0	0	0	0	0	0	0	0	0	0	0	0	0	0	0	0
Cupressales	Cupressaceae	Cupressus torulosa	D.Don	13	Least concern	0	0	0	0	0	0	0	0	0	1	0	0	0	0	0	0	0	0	0	0	0	0	0	0	0	0	0	0	0	0	0	0	0	0	0	0	0	0	0	0	0	0	0	0
Cornales	Curtisiaceae	Curtisia dentata	(Burm.f.) C.A.Sm.	15	Not assessed	0	0	0	0	0	0	0	0	0	0	0	0	0	0	0	0	0	0	0	0	0	1	0	0	0	0	0	0	0	0	0	0	0	0	0	0	0	0	0	0	0	0	0	0
Apiales	Araliaceae	Cussonia angolensis	(Seem.) Hiern	1	Not assessed	0	0	0	0	0	0	0	0	0	0	0	0	0	0	0	0	0	0	0	1	0	0	0	0	0	0	0	0	0	0	0	0	0	0	0	0	0	0	0	0	0	0	0	0
Apiales	Araliaceae	Cussonia arenicola	Strey	2	Not assessed	0	0	0	0	0	0	0	0	0	0	0	0	0	0	0	0	0	0	0	0	0	1	0	0	0	0	0	0	0	0	0	0	0	0	0	0	0	0	0	0	0	0	0	0
Apiales	Araliaceae	Cussonia gamtoosensis	Strey	2	Vulnerable	0	0	0	0	0	0	0	0	0	0	0	0	0	0	0	0	0	0	0	0	0	1	0	0	0	0	0	0	0	0	0	0	0	0	0	0	0	0	0	0	0	0	0	0
Apiales	Araliaceae	Cussonia natalensis	Strey	4	Not assessed	0	0	0	0	0	0	0	0	0	0	0	0	0	0	0	0	0	0	0	0	0	1	0	0	0	0	0	0	0	0	0	0	0	0	0	0	0	0	0	0	0	0	0	0
Apiales	Araliaceae	Cussonia nicholsonii	Strey	4	Not assessed	0	0	0	0	0	0	0	0	0	0	0	0	0	0	0	0	0	0	0	0	0	1	0	0	0	0	0	0	0	0	0	0	0	0	0	0	0	0	0	0	0	0	0	0
Apiales	Araliaceae	Cussonia paniculata	Eckl. & Zeyh.	18	Least concern	0	0	0	0	0	0	0	0	0	0	0	0	0	0	0	0	0	0	0	0	0	1	0	0	0	0	0	0	0	0	0	0	0	0	0	0	0	0	0	0	0	0	0	0
Apiales	Araliaceae	Cussonia paniculata subsp. sinuata	(Reyneke & Kok) De Winter	4	Not assessed	0	0	0	0	0	0	0	0	0	0	0	0	0	0	0	0	0	0	0	0	0	1	0	0	0	0	0	0	0	0	0	0	0	0	0	0	0	0	0	0	0	0	0	0
Apiales	Araliaceae	Cussonia sphaerocephala	Strey	5	Not assessed	0	0	0	0	0	0	0	0	0	0	0	0	0	0	0	0	0	0	0	0	0	1	0	0	0	0	0	0	0	0	0	0	0	0	0	0	0	0	0	0	0	0	0	0
Apiales	Araliaceae	Cussonia spicata	Thunb.	28	Not assessed	0	0	0	0	0	0	0	0	0	0	0	0	0	0	0	0	0	0	0	0	1	1	0	0	0	0	0	0	0	0	0	0	0	0	0	0	0	0	0	0	0	0	0	0
Apiales	Araliaceae	Cussonia thyrsiflora	Thunb.	2	Least concern	0	0	0	0	0	0	0	0	0	0	0	0	0	0	0	0	0	0	0	0	0	1	0	0	0	0	0	0	0	0	0	0	0	0	0	0	0	0	1	0	0	0	0	0
Apiales	Araliaceae	Cussonia transvaalensis	Reyneke	4	Not assessed	0	0	0	0	0	0	0	0	0	0	0	0	0	0	0	0	0	0	0	0	0	1	0	0	0	0	0	0	0	0	0	0	0	0	0	0	0	0	0	0	0	0	0	0
Apiales	Araliaceae	Cussonia zuluensis	Strey	4	Not assessed	0	0	0	0	0	0	0	0	0	0	0	0	0	0	0	0	0	0	0	0	1	1	0	0	0	0	0	0	0	0	0	0	0	0	0	0	0	0	0	0	0	0	0	0
Fabales	Fabaceae	Cyclopia genistoides	(L.) Vent.	1	Not assessed	0	0	0	0	0	0	0	0	0	0	0	0	0	0	0	0	0	0	0	0	0	1	0	0	0	0	0	0	0	0	0	0	0	0	0	0	0	0	0	0	0	0	0	0
Fabales	Fabaceae	Cyclopia intermedia	E.Mey.	1	Not assessed	0	0	0	0	0	0	0	0	0	0	0	0	0	0	0	0	0	0	0	0	0	0	0	0	0	0	0	0	0	0	0	0	0	0	0	0	0	0	1	0	0	0	0	0
Fabales	Fabaceae	Cyclopia meyeriana	Walp.	1	Not assessed	0	0	0	0	0	0	0	0	0	0	0	0	0	0	0	0	0	0	0	0	0	0	0	0	0	0	0	0	0	0	0	0	0	0	0	0	0	0	1	0	0	0	0	0
Fabales	Fabaceae	Cyclopia pubescens	Eckl. & Zeyh.	1	Not assessed	0	0	0	0	0	0	0	0	0	0	0	0	0	0	0	0	0	0	0	0	0	0	0	0	0	0	0	0	0	0	0	0	0	0	0	0	0	0	1	0	0	0	0	0
Fabales	Fabaceae	Cyclopia subternata	Vogel	1	Not assessed	0	0	0	0	0	0	0	0	0	0	0	0	0	0	0	0	0	0	0	0	0	0	0	0	0	0	0	0	0	0	0	0	0	0	0	0	0	0	1	0	0	0	0	0
Rosales	Rosaceae	Cydonia oblonga	Mill.	1	Least concern	0	0	0	0	0	0	0	0	0	0	1	0	0	0	0	0	0	0	0	0	0	0	0	0	0	0	0	0	0	0	0	0	0	0	0	0	0	0	0	0	0	0	0	0
Vitales	Vitaceae	Cyphostemma currorii	(Hook.f.) Desc.	3	Not assessed	0	0	0	0	0	0	0	0	0	0	0	0	0	0	0	0	0	0	0	0	0	1	0	0	0	0	0	0	0	0	0	0	0	0	0	0	0	0	0	0	0	0	0	0
Vitales	Vitaceae	Cyphostemma elephantopus	Desc.	1	Not assessed	0	0	0	0	0	0	0	0	0	0	0	0	0	0	0	0	0	0	0	0	0	0	1	0	0	0	0	0	0	0	0	0	0	0	0	0	0	0	0	0	0	0	0	0
Vitales	Vitaceae	Cyphostemma juttae	(Dinter & Gilg) Desc.	4	Least concern	0	0	0	0	0	0	0	0	0	0	0	0	0	0	0	0	0	0	0	0	1	0	0	0	0	0	0	0	0	0	0	0	0	0	0	0	0	0	0	0	0	0	0	0
Arecales	Arecaceae	Cyrtostachys renda	Blume	1	Not assessed	0	0	0	0	0	0	0	0	0	0	0	0	0	0	0	0	0	0	0	0	0	0	0	0	0	0	1	0	0	0	0	0	0	0	0	0	0	0	0	0	0	0	0	0
Fabales	Fabaceae	Cytisus scoparius	(L.) Link	2	Not assessed	1	1	1	1	0	0	0	1	0	0	0	1	0	0	0	0	0	0	0	0	0	0	0	0	0	0	0	0	0	0	0	0	0	0	0	0	0	0	0	0	0	0	0	0
Podocarpales	Podocarpaceae	Dacrydium cupressinum	Sol. ex G.Forst.	3	Least concern	0	0	0	0	0	0	0	0	0	0	0	0	0	0	0	0	0	0	0	0	0	0	0	0	0	0	0	0	0	0	0	0	0	0	0	0	0	0	0	0	0	0	1	0
Asterales	Asteraceae	Dahlia imperialis	Roezl ex Ortgies	1	Not assessed	1	0	0	0	0	0	0	0	0	0	0	0	0	0	0	0	0	0	0	0	0	0	0	0	0	0	0	0	0	0	0	1	1	0	0	0	0	0	0	0	0	0	0	0
Malvales	Thymelaeaceae	Dais cotinifolia	L.	26	Not assessed	0	0	0	0	0	0	0	0	0	0	0	0	0	0	0	0	0	0	0	0	1	1	0	0	0	0	0	0	0	0	0	0	0	0	0	0	0	0	0	0	0	0	0	0
Fabales	Fabaceae	Dalbergia armata	E.Mey.	2	Not assessed	0	0	0	0	0	0	0	0	0	0	0	0	0	0	0	0	0	0	0	0	1	1	0	0	0	0	0	0	0	0	0	0	0	0	0	0	0	0	0	0	0	0	0	0
Fabales	Fabaceae	Dalbergia melanoxylon	Guill. & Perr.	3	Near threatened	0	0	0	0	0	0	0	0	0	0	0	0	0	0	0	0	0	1	1	1	1	1	0	0	0	0	0	0	0	0	0	0	0	0	0	0	0	0	0	0	0	0	0	0
Fabales	Fabaceae	Dalbergia nitidula	Welw. ex Baker	1	Least concern	0	0	0	0	0	0	0	0	0	0	0	0	0	0	0	0	0	0	0	1	1	1	0	0	0	0	0	0	0	0	0	0	0	0	0	0	0	0	0	0	0	0	0	0
Fabales	Fabaceae	Dalbergia obovata	E.Mey.	4	Not assessed	0	0	0	0	0	0	0	0	0	0	0	0	0	0	0	0	0	0	0	0	1	1	0	0	0	0	0	0	0	0	0	0	0	0	0	0	0	0	0	0	0	0	0	0
Fabales	Fabaceae	Dalbergia sissoo	Roxb. ex DC.	1	Not assessed	0	0	1	1	0	0	0	0	0	0	0	0	0	0	0	0	1	0	0	0	0	0	0	0	1	1	0	0	0	0	0	0	0	0	0	0	0	0	0	0	0	0	0	0
Asparagales	Asparagaceae	Dasylirion longissimum	Lem.	1	Not assessed	0	0	0	0	0	0	0	0	0	0	0	0	0	0	0	1	0	0	0	0	0	0	0	0	0	0	0	0	0	0	0	0	0	0	0	0	0	0	0	0	0	0	0	0
Asparagales	Asparagaceae	Dasylirion wheeleri	S.Watson ex Rothr.	1	Least concern	0	0	0	0	0	0	0	0	0	0	0	0	0	0	0	1	0	0	0	0	0	0	0	0	0	0	0	0	0	0	0	0	0	0	0	0	0	0	0	0	0	0	0	0
Sapindales	Sapindaceae	Deinbollia oblongifolia	(E.Mey.) Radlk.	4	Least concern	0	0	0	0	0	0	0	0	0	0	0	0	0	0	0	0	0	0	0	0	0	1	0	0	0	0	0	0	0	0	0	0	0	0	0	0	0	0	0	0	0	0	0	0
Sapindales	Sapindaceae	Deinbollia obovata	Radlk.	1	Not assessed	0	0	0	0	0	0	0	0	0	0	0	0	0	0	0	0	0	0	0	1	0	0	0	0	0	0	0	0	0	0	0	0	0	0	0	0	0	0	0	0	0	0	0	0
Fabales	Fabaceae	Delonix decaryi	(R.Vig.) Capuron	1	Vulnerable	0	0	0	0	0	0	0	0	0	0	0	0	0	0	0	0	0	0	0	0	0	0	1	0	0	0	0	0	0	0	0	0	0	0	0	0	0	0	0	0	0	0	0	0
Fabales	Fabaceae	Delonix regia	Bojer	8	Least concern	1	0	1	0	0	0	0	0	0	0	0	0	0	0	0	0	0	0	0	0	0	0	1	0	0	0	0	0	0	0	0	0	0	0	0	0	0	0	0	0	0	0	0	0
Lamiales	Scrophulariaceae	Dermatobotrys saundersii	Bolus	1	Not assessed	0	0	0	0	0	0	0	0	0	0	0	0	0	0	0	0	0	0	0	0	0	1	1	0	0	0	0	0	0	0	0	0	0	0	0	0	0	0	0	0	0	0	0	0
Fabales	Fabaceae	Desmodium oojeinense	(Roxb.) H.Ohashi	1	Not assessed	0	0	0	0	0	0	0	0	0	0	0	0	0	0	0	0	0	0	0	0	0	0	0	0	1	0	0	0	0	0	0	0	0	0	0	0	0	0	0	0	0	0	0	0
Fabales	Fabaceae	Dialium schlechteri	Harms	2	Least concern	0	0	0	0	0	0	0	0	0	0	0	0	0	0	0	0	0	0	0	0	0	1	0	0	0	0	0	0	0	0	0	0	0	0	0	0	0	0	0	0	0	0	0	0
Fabales	Fabaceae	Dichrostachys cinerea	(L.) Wight & Arn.	5	Least concern	0	0	1	1	0	0	0	0	0	0	0	0	0	0	0	0	0	1	0	0	1	1	1	0	1	1	0	0	0	0	0	0	0	0	0	0	0	0	0	0	0	0	0	0
Arecales	Arecaceae	Dictyosperma album	(Bory) Scheff.	1	Critically endangered	0	0	0	0	0	0	0	0	0	0	0	0	0	0	0	0	0	0	0	0	0	0	1	0	0	0	0	0	0	0	0	0	0	0	0	0	0	0	0	0	0	0	0	0
Asterales	Asteraceae	Didelta spinosa	Aiton	1	Least concern	0	0	0	0	0	0	0	0	0	0	0	0	0	0	0	0	0	0	0	0	0	1	0	0	0	0	0	0	0	0	0	0	0	0	0	0	0	0	1	0	0	0	0	0
Caryophyllales	Didiereaceae	Didierea madagascariensis	Baill.	1	Least concern	0	0	0	0	0	0	0	0	0	0	0	0	0	0	0	0	0	0	0	0	0	0	1	0	0	0	0	0	0	0	0	0	0	0	0	0	0	0	0	0	0	0	0	0
Caryophyllales	Didiereaceae	Didierea trollii	Capuron & Rauh	2	Vulnerable	0	0	0	0	0	0	0	0	0	0	0	0	0	0	0	0	0	0	0	0	0	0	1	0	0	0	0	0	0	0	0	0	0	0	0	0	0	0	0	0	0	0	0	0
Dilleniales	Dilleniaceae	Dillenia indica	L.	2	Not assessed	0	0	0	0	0	0	0	0	0	1	0	0	0	0	0	0	0	0	0	0	0	0	0	0	1	1	0	0	0	0	0	0	0	0	0	0	0	0	0	0	0	0	0	0
Sapindales	Sapindaceae	Dimocarpus longan	Lour.	1	Near threatened	0	0	0	0	0	0	0	0	0	1	0	0	0	0	0	0	0	0	0	0	0	0	0	0	0	1	1	0	0	0	0	0	0	0	0	0	0	0	0	0	0	0	0	0
Ericales	Ebenaceae	Diospyros acocksii	(De Winter) De Winter	1	Not assessed	0	0	0	0	0	0	0	0	0	0	0	0	0	0	0	0	0	0	0	0	0	1	0	0	0	0	0	0	0	0	0	0	0	0	0	0	0	0	0	0	0	0	0	0
Ericales	Ebenaceae	Diospyros austro-africana	De Winter	2	Not assessed	0	0	0	0	0	0	0	0	0	0	0	0	0	0	0	0	0	0	0	0	0	1	0	0	0	0	0	0	0	0	0	0	0	0	0	0	0	0	1	0	0	0	0	0
Ericales	Ebenaceae	Diospyros batocana	Hiern	1	Not assessed	0	0	0	0	0	0	0	0	0	0	0	0	0	0	0	0	0	0	0	1	1	0	0	0	0	0	0	0	0	0	0	0	0	0	0	0	0	0	0	0	0	0	0	0
Ericales	Ebenaceae	Diospyros blancoi	A. DC.	1	Not assessed	0	0	0	0	0	0	0	0	0	1	0	0	0	0	0	0	0	0	0	0	0	0	0	0	0	1	1	0	0	0	0	0	0	0	0	0	0	0	0	0	0	0	0	0
Ericales	Ebenaceae	Diospyros dichrophylla	(Gand.) De Winter	3	Least concern	0	0	1	0	1	0	0	0	0	0	0	0	0	0	0	0	0	0	0	0	0	1	0	0	0	0	0	0	0	0	0	0	0	0	0	0	0	0	0	0	0	0	0	0
Ericales	Ebenaceae	Diospyros egrettarum	I.Richardson	1	Critically endangered	0	0	0	0	0	0	0	0	0	0	0	0	0	0	0	0	0	0	0	0	0	0	1	0	0	0	0	0	0	0	0	0	0	0	0	0	0	0	0	0	0	0	0	0
Ericales	Ebenaceae	Diospyros glabra	(L.) De Winter	3	Not assessed	0	0	0	0	1	1	0	0	0	0	0	0	0	0	0	0	0	0	0	0	0	1	0	0	0	0	0	0	0	0	0	0	0	0	0	0	0	0	1	0	0	0	0	0
Ericales	Ebenaceae	Diospyros inhacaensis	F.White	2	Least concern	0	0	0	0	0	0	0	0	0	0	0	0	0	0	0	0	0	0	0	0	0	1	0	0	0	0	0	0	0	0	0	0	0	0	0	0	0	0	0	0	0	0	0	0
Ericales	Ebenaceae	Diospyros kaki	L.f.	5	Not assessed	0	0	0	0	1	0	0	0	0	1	0	0	0	0	0	0	0	0	0	0	0	0	0	0	0	0	0	0	0	0	0	0	0	0	0	0	0	0	0	0	0	0	0	0
Ericales	Ebenaceae	Diospyros lycioides	Desf.	11	Not assessed	0	0	0	0	1	0	0	0	0	0	0	0	0	0	0	0	0	0	0	0	0	1	0	0	0	0	0	0	0	0	0	0	0	0	0	0	0	0	0	0	0	0	0	0
Ericales	Ebenaceae	Diospyros lycioides subsp. guerkei	(Kuntze) De Winter	6	Not assessed	0	0	0	0	0	0	0	0	0	0	0	0	0	0	0	0	0	0	0	0	0	1	0	0	0	0	0	0	0	0	0	0	0	0	0	0	0	0	0	0	0	0	0	0
Ericales	Ebenaceae	Diospyros mespiliformis	Hochst. ex A.DC.	5	Not assessed	0	0	0	0	0	0	0	0	0	0	0	0	0	0	0	0	0	0	1	0	1	1	0	0	0	0	0	0	0	0	0	0	0	0	0	0	0	0	0	0	0	0	0	0
Ericales	Ebenaceae	Diospyros natalensis	(Harv.) Brenan	5	Not assessed	0	0	0	0	0	0	0	0	0	0	0	0	0	0	0	0	0	0	0	0	0	1	0	0	0	0	0	0	0	0	0	0	0	0	0	0	0	0	0	0	0	0	0	0
Ericales	Ebenaceae	Diospyros nummularia	Brenan	1	Not assessed	0	0	0	0	0	0	0	0	0	0	0	0	0	0	0	0	0	0	0	0	1	1	0	0	0	0	0	0	0	0	0	0	0	0	0	0	0	0	0	0	0	0	0	0
Ericales	Ebenaceae	Diospyros rotundifolia	Hiern	1	Not assessed	0	0	0	0	0	0	0	0	0	0	0	0	0	0	0	0	0	0	0	0	1	0	0	0	0	0	0	0	0	0	0	0	0	0	0	0	0	0	0	0	0	0	0	0
Ericales	Ebenaceae	Diospyros simii	(Kuntze) De Winter	1	Least concern	0	0	0	0	0	0	0	0	0	0	0	0	0	0	0	0	0	0	0	0	0	1	0	0	0	0	0	0	0	0	0	0	0	0	0	0	0	0	0	0	0	0	0	0
Ericales	Ebenaceae	Diospyros villosa	(L.) De Winter	1	Least concern	0	0	0	0	0	0	0	0	0	0	0	0	0	0	0	0	0	0	0	0	0	1	0	0	0	0	0	0	0	0	0	0	0	0	0	0	0	0	0	0	0	0	0	0
Ericales	Ebenaceae	Diospyros whyteana	(Hiern) F. White	15	Not assessed	0	0	0	0	0	0	0	0	0	0	0	0	0	0	0	0	0	0	0	0	0	1	0	0	0	0	0	0	0	0	0	0	0	0	0	0	0	0	0	0	0	0	0	0
Myrtales	Melastomataceae	Dissotis canescens	(E.Mey. ex R.A.Graham) Hook.f.	1	Not assessed	0	0	0	0	0	0	0	0	0	0	0	0	0	0	0	0	0	1	1	1	1	1	0	0	0	0	0	0	0	0	0	0	0	0	0	0	0	0	0	0	0	0	0	0
Myrtales	Melastomataceae	Dissotis princeps	(Kunth) Triana	1	Not assessed	0	0	0	0	0	0	0	0	0	0	0	0	0	0	0	0	0	1	1	1	1	1	0	0	0	0	0	0	0	0	0	0	0	0	0	0	0	0	0	0	0	0	0	0
Sapindales	Sapindaceae	Dodonaea viscosa	Jacq.	10	Not assessed	0	0	0	0	0	0	0	0	0	0	0	0	0	0	0	0	0	0	0	0	1	1	0	0	0	0	0	0	0	0	0	0	0	0	0	0	0	0	0	0	0	0	0	0
Sapindales	Sapindaceae	Dodonaea viscosa cv. 'Purpurea'	Jacq.	1	NA	0	0	0	0	0	0	0	0	0	0	0	0	0	0	0	0	0	0	0	0	0	0	0	0	0	0	0	0	0	0	0	0	0	0	0	0	0	0	0	0	0	0	0	0
Malvales	Malvaceae	Dombeya × cayeuxii	André	1	NA	0	0	0	0	0	0	0	0	0	0	0	0	0	0	0	0	0	0	0	0	0	0	0	0	0	0	0	0	0	0	0	0	0	0	0	0	0	0	0	0	0	0	0	0
Malvales	Malvaceae	Dombeya autumnalis	I.Verd.	2	Not assessed	0	0	0	0	0	0	0	0	0	0	0	0	0	0	0	0	0	0	0	0	0	1	0	0	0	0	0	0	0	0	0	0	0	0	0	0	0	0	0	0	0	0	0	0
Malvales	Malvaceae	Dombeya burgessiae	Gerrard ex Harv.	11	Not assessed	0	0	0	0	0	0	0	0	0	0	0	0	0	0	0	0	0	0	0	0	1	1	0	0	0	0	0	0	0	0	0	0	0	0	0	0	0	0	0	0	0	0	0	0
Malvales	Malvaceae	Dombeya cacuminum	Hochr.	3	Not assessed	0	0	0	0	1	0	0	0	0	0	0	0	0	0	0	0	0	0	0	0	0	0	1	0	0	0	0	0	0	0	0	0	0	0	0	0	0	0	0	0	0	0	0	0
Malvales	Malvaceae	Dombeya cymosa	Harv.	4	Least concern	0	0	0	0	0	0	0	0	0	0	0	0	0	0	0	0	0	0	0	0	0	1	0	0	0	0	0	0	0	0	0	0	0	0	0	0	0	0	0	0	0	0	0	0
Malvales	Malvaceae	Dombeya kirkii	Mast.	1	Not assessed	0	0	0	0	0	0	0	0	0	0	0	0	0	0	0	0	0	0	0	0	1	1	0	0	0	0	0	0	0	0	0	0	0	0	0	0	0	0	0	0	0	0	0	0
Malvales	Malvaceae	Dombeya pulchra	N.E.Br.	5	Not assessed	0	0	0	0	0	0	0	0	0	0	0	0	0	0	0	0	0	0	0	0	0	1	0	0	0	0	0	0	0	0	0	0	0	0	0	0	0	0	0	0	0	0	0	0
Malvales	Malvaceae	Dombeya rotundifolia	(Hochst.)Planch.	22	Not assessed	0	0	0	0	1	0	0	0	0	0	0	0	0	0	0	0	0	0	0	1	1	1	0	0	0	0	0	0	0	0	0	0	0	0	0	0	0	0	0	0	0	0	0	0
Malvales	Malvaceae	Dombeya tiliacea	(Endl.) Planch.	5	Not assessed	0	0	0	0	0	0	0	0	0	0	0	0	0	0	0	0	0	0	0	0	0	1	0	0	0	0	0	0	0	0	0	0	0	0	0	0	0	0	0	0	0	0	0	0
Malvales	Malvaceae	Dombeya wallichii	(Lindl.) Baill.	1	Not assessed	0	0	0	0	0	0	0	0	0	0	0	0	0	0	0	0	0	0	0	0	0	0	1	0	0	0	0	0	0	0	0	0	0	0	0	0	0	0	0	0	0	0	0	0
Malpighiales	Salicaceae	Dovyalis caffra	(Hook. f. & Harv.) Hook.f.	16	Not assessed	0	0	1	0	1	0	0	0	0	0	0	0	0	0	0	0	0	0	0	0	0	1	0	0	0	0	0	0	0	0	0	0	0	0	0	0	0	0	0	0	0	0	0	0
Malpighiales	Salicaceae	Dovyalis longispina	(Harv.) Warb.	7	Not assessed	0	0	0	0	0	0	0	0	0	0	0	0	0	0	0	0	0	0	0	0	0	1	0	0	0	0	0	0	0	0	0	0	0	0	0	0	0	0	0	0	0	0	0	0
Malpighiales	Salicaceae	Dovyalis rhamnoides	(Burch. Ex DC.) Burch. & Harv.	3	Not assessed	0	0	0	0	0	0	0	0	0	0	0	0	0	0	0	0	0	0	0	0	0	1	0	0	0	0	0	0	0	0	0	0	0	0	0	0	0	0	0	0	0	0	0	0
Malpighiales	Salicaceae	Dovyalis zeyheri	(Sond.) Warb.	3	Least concern	0	0	0	0	0	0	0	0	0	0	0	0	0	0	0	0	0	0	0	0	0	1	0	0	0	0	0	0	0	0	0	0	0	0	0	0	0	0	0	0	0	0	0	0
Asparagales	Asparagaceae	Dracaena aletriformis	(Haw.) Bos	9	Not assessed	0	0	0	0	0	0	0	0	0	0	0	0	0	0	0	0	0	0	0	0	0	1	0	0	0	0	0	0	0	0	0	0	0	0	0	0	0	0	0	0	0	0	0	0
Asparagales	Asparagaceae	Dracaena cinnabari	Balf.f.	1	Vulnerable	0	0	0	0	0	0	0	0	0	0	0	0	0	0	0	0	0	0	1	0	0	0	0	0	0	0	0	0	0	0	0	0	0	0	0	0	0	0	0	0	0	0	0	0
Asparagales	Asparagaceae	Dracaena draco	(L.) L.	9	Vulnerable	0	0	0	0	1	0	0	0	0	0	0	0	1	0	0	0	0	0	0	0	0	0	0	0	0	0	0	0	0	0	0	0	0	0	0	0	0	0	0	0	0	0	0	0
Asparagales	Asparagaceae	Dracaena fragrans	(L.) Ker Gawl.	2	Least concern	0	0	0	0	0	0	0	0	0	0	0	0	0	0	0	0	0	1	1	1	1	0	0	0	0	0	0	0	0	0	0	0	0	0	0	0	0	0	0	0	0	0	0	0
Asparagales	Asparagaceae	Dracaena fragrans cv. 'Musangeana'	(L.) Ker Gawl.	1	NA	0	0	0	0	0	0	0	0	0	0	0	0	0	0	0	0	0	0	0	0	0	0	0	0	0	0	0	0	0	0	0	0	0	0	0	0	0	0	0	0	0	0	0	0
Asparagales	Asparagaceae	Dracaena fragrans cv. 'Warneckii'	(L.) Ker Gawl.	1	NA	0	0	0	0	0	0	0	0	0	0	0	0	0	0	0	0	0	0	0	0	0	0	0	0	0	0	0	0	0	0	0	0	0	0	0	0	0	0	0	0	0	0	0	0
Asparagales	Asparagaceae	Dracaena mannii	Baker	2	Least concern	0	0	0	0	0	0	0	0	0	0	0	0	0	0	0	0	0	0	0	0	0	1	0	0	0	0	0	0	0	0	0	0	0	0	0	0	0	0	0	0	0	0	0	0
Asparagales	Asparagaceae	Dracaena reflexa	Lam.	5	Not assessed	0	0	0	0	0	0	0	0	0	0	0	0	0	0	0	0	0	0	0	0	0	0	1	0	0	0	0	0	0	0	0	0	0	0	0	0	0	0	0	0	0	0	0	0
Asparagales	Asparagaceae	Dracaena reflexa var. angustifolia	Baker	1	Not assessed	0	0	0	0	0	0	0	0	0	0	0	0	0	0	0	0	0	0	0	0	0	0	1	0	0	0	0	0	0	0	0	0	0	0	0	0	0	0	0	0	0	0	0	0
Asparagales	Asparagaceae	Dracaena steudneri	Engl.	4	Not assessed	0	0	0	0	0	0	0	0	0	0	0	0	0	0	0	0	0	0	0	0	0	0	0	0	0	0	0	0	0	0	0	0	0	0	0	0	0	0	0	0	0	0	0	0
Asparagales	Asparagaceae	Dracaena transvaalensis	Baker	3	Not assessed	0	0	0	0	0	0	0	0	0	0	0	0	0	0	0	0	0	0	0	0	0	1	0	0	0	0	0	0	0	0	0	0	0	0	0	0	0	0	0	0	0	0	0	0
Gentianales	Apocynaceae	Dregea floribunda	E.Mey.	1	Not assessed	0	0	0	0	0	0	0	0	0	0	0	0	0	0	0	0	0	0	0	0	0	1	0	0	0	0	0	0	0	0	0	0	0	0	0	0	0	0	0	0	0	0	0	0
Canallales	Winteraceae	Drimys winteri	J.R.Forst. & G.Forst.	1	Least concern	0	0	0	0	0	0	0	0	0	0	0	0	0	0	0	0	0	0	0	0	0	0	0	0	0	0	0	0	0	0	0	0	0	0	0	0	0	0	0	0	0	0	0	1
Malpighiales	Putranjivaceae	Drypetes arguta	(Müll. Arg.) Hutch.	2	Least concern	0	0	0	0	0	0	0	0	0	0	0	0	0	0	0	0	0	0	0	0	1	1	0	0	0	0	0	0	0	0	0	0	0	0	0	0	0	0	0	0	0	0	0	0
Malpighiales	Putranjivaceae	Drypetes gerrardii	Hutch.	1	Least concern	0	0	0	0	0	0	0	0	0	0	0	0	0	0	0	0	0	0	0	0	1	1	0	0	0	0	0	0	0	0	0	0	0	0	0	0	0	0	0	0	0	0	0	0
Malpighiales	Putranjivaceae	Drypetes mossambicensis	Hutch.	1	Not assessed	0	0	0	0	0	0	0	0	0	0	0	0	0	0	0	0	0	0	0	0	1	1	0	0	0	0	0	0	0	0	0	0	0	0	0	0	0	0	0	0	0	0	0	0
Malpighiales	Putranjivaceae	Drypetes natalensis	(Harv.) Hutch.	2	Vulnerable	0	0	0	0	0	0	0	0	0	0	0	0	0	0	0	0	0	1	1	0	1	1	0	0	0	0	0	0	0	0	0	0	0	0	0	0	0	0	0	0	0	0	0	0
Lamiales	Verbenaceae	Duranta erecta	L.	12	Not assessed	1	0	1	0	0	0	0	0	0	0	0	0	0	0	0	0	0	0	0	0	0	0	0	0	0	0	0	0	0	0	0	1	1	1	1	0	1	0	0	0	0	0	0	0
Lamiales	Verbenaceae	Duranta erecta cv. 'Variegata'	L.	1	NA	0	0	0	0	0	0	0	0	0	0	0	0	0	0	0	0	0	0	0	0	0	0	0	0	0	0	0	0	0	0	0	0	0	0	0	0	0	0	0	0	0	0	0	0
Arecales	Arecaceae	Dypsis cabadae	(H.E. Moore) Beentje & J. Dransf.	1	Not assessed	0	0	0	0	0	0	0	0	0	0	0	0	0	0	0	0	0	0	0	0	0	0	0	0	0	0	0	0	0	0	0	0	0	0	0	0	0	0	0	0	0	0	0	0
Arecales	Arecaceae	Dypsis decaryi	(Jum.) Beentje & J. Dransf.	6	Vulnerable	0	0	0	0	0	0	0	0	0	0	0	0	0	0	0	0	0	0	0	0	0	0	1	0	0	0	0	0	0	0	0	0	0	0	0	0	0	0	0	0	0	0	0	0
Arecales	Arecaceae	Dypsis lanceolata	(Becc.) Beentje & J. Dransf.	1	Vulnerable	0	0	0	0	0	0	0	0	0	0	0	0	0	0	0	0	0	0	0	0	0	0	1	0	0	0	0	0	0	0	0	0	0	0	0	0	0	0	0	0	0	0	0	0
Arecales	Arecaceae	Dypsis lutescens	(H.Wendl.) Beentje & J.Dransf.	6	Near threatened	0	0	0	0	0	0	0	0	0	0	0	0	0	0	0	0	0	0	0	0	0	0	1	0	0	0	0	0	0	0	0	0	0	0	0	0	0	0	0	0	0	0	0	0
Arecales	Arecaceae	Dypsis madagascariensis	(Becc.) Beentje & J.Dransf.	5	Least concern	0	0	1	0	0	0	0	0	0	0	0	0	0	0	0	0	0	0	0	0	0	0	1	0	0	0	0	0	0	0	0	0	0	0	0	0	0	0	0	0	0	0	0	0
Boraginales	Boraginaceae	Echium nervosum	Ait.	1	Not assessed	0	0	0	0	0	0	0	0	0	0	0	0	1	0	0	0	0	0	0	0	0	0	0	0	0	0	0	0	0	0	0	0	0	0	0	0	0	0	0	0	0	0	0	0
Boraginales	Boraginaceae	Echium pininana	Webb & Berthel.	1	Endangered	0	0	0	0	0	0	0	0	0	0	0	0	1	0	0	0	0	0	0	0	0	0	0	0	0	0	0	0	0	0	0	0	0	0	0	0	0	0	0	0	0	0	0	0
Boraginales	Boraginaceae	Echium simplex	DC.	2	Not assessed	0	0	0	0	0	0	0	0	0	0	0	0	1	0	0	0	0	0	0	0	0	0	0	0	0	0	0	0	0	0	0	0	0	0	0	0	0	0	0	0	0	0	0	0
Boraginales	Boraginaceae	Echium virescens	DC.	1	Not assessed	0	0	0	0	0	0	0	0	0	0	0	0	1	0	0	0	0	0	0	0	0	0	0	0	0	0	0	0	0	0	0	0	0	0	0	0	0	0	0	0	0	0	0	0
Boraginales	Boraginaceae	Echium wildpretii	H.Pearson ex Hook.f.	2	Not assessed	0	0	0	0	0	0	0	0	0	0	0	0	1	0	0	0	0	0	0	0	0	0	0	0	0	0	0	0	0	0	0	0	0	0	0	0	0	0	0	0	0	0	0	0
Boraginales	Boraginaceae	Echium wildpretii var. trichosiphon	(Svent.) Bramwell	2	Not assessed	0	0	0	0	0	0	0	0	0	0	0	0	1	0	0	0	0	0	0	0	0	0	0	0	0	0	0	0	0	0	0	0	0	0	0	0	0	0	0	0	0	0	0	0
Lamiales	Ehretiaceae	Ehretia amoena	Klotzsch	3	Not assessed	0	0	0	0	0	0	0	0	0	0	0	0	0	0	0	0	0	0	0	0	1	1	0	0	0	0	0	0	0	0	0	0	0	0	0	0	0	0	0	0	0	0	0	0
Lamiales	Ehretiaceae	Ehretia obtusifolia	Hochst. ex A.DC.	2	Least concern	0	0	0	0	0	0	0	0	0	0	0	0	0	0	0	0	0	0	1	0	1	1	0	0	0	0	0	0	0	0	0	0	0	0	0	0	0	0	0	0	0	0	0	0
Lamiales	Ehretiaceae	Ehretia rigida	(Thunb.) Druce	15	Not assessed	0	0	0	0	0	0	0	0	0	0	0	0	0	0	0	0	0	0	0	0	0	1	0	0	0	0	0	0	0	0	0	0	0	0	0	0	0	0	0	0	0	0	0	0
Lamiales	Ehretiaceae	Ehretia rigida subsp. nervifolia	Retief & A.E. van Wyk	1	Not assessed	0	0	0	0	0	0	0	0	0	0	0	0	0	0	0	0	0	0	0	0	0	1	0	0	0	0	0	0	0	0	0	0	0	0	0	0	0	0	0	0	0	0	0	0
Sapindales	Meliaceae	Ekebergia capensis	Sparrm.	24	Least concern	0	0	0	0	1	0	0	0	0	0	0	0	0	0	0	0	0	0	1	1	1	1	0	0	0	0	0	0	0	0	0	0	0	0	0	0	0	0	0	0	0	0	0	0
Sapindales	Meliaceae	Ekebergia pterophylla	(C. DC.) Hofmeyer	2	Least concern	0	0	0	0	0	0	0	0	0	0	0	0	0	0	0	0	0	0	0	0	0	1	0	0	0	0	0	0	0	0	0	0	0	0	0	0	0	0	0	0	0	0	0	0
Rosales	Elaeagnaceae	Elaeagnus pungens	Thunb.	2	Not assessed	0	0	1	1	0	0	0	0	0	1	0	0	0	0	0	0	0	0	0	0	0	0	0	0	0	0	0	0	0	0	0	0	0	0	0	0	0	0	0	0	0	0	0	0
Arecales	Arecaceae	Elaeis guineensis	Jacq.	2	Least concern	0	0	1	1	0	0	0	0	0	0	0	0	0	0	0	0	0	0	1	1	1	0	0	0	0	0	0	0	0	0	0	0	0	0	0	0	0	0	0	0	0	0	0	0
Oxalidales	Elaeocarpaceae	Elaeocarpus grandis	F.Muell.	1	Not assessed	0	0	0	0	0	0	0	0	0	0	0	0	0	0	0	0	0	0	0	0	0	0	0	0	0	0	0	0	0	0	0	0	0	0	0	0	0	0	0	1	0	0	0	0
Oxalidales	Elaeocarpaceae	Elaeocarpus reticulatus	Sm.	1	Not assessed	0	0	0	0	0	0	0	0	0	0	0	0	0	0	0	0	0	0	0	0	0	0	0	0	0	0	0	0	0	0	0	0	0	0	0	0	0	0	0	1	0	0	0	0
Oxalidales	Elaeocarpaceae	Elaeocarpus serratus	L.	1	Not assessed	0	0	0	0	0	0	0	0	0	0	0	0	0	0	0	0	0	0	0	0	0	0	0	0	1	0	0	0	0	0	0	0	0	0	0	0	0	0	0	0	0	0	0	0
Celastrales	Celastraceae	Elaeodendron croceum	(Thunb.) DC.	11	Least concern	0	0	0	0	0	0	0	0	0	0	0	0	0	0	0	0	0	0	0	0	0	1	0	0	0	0	0	0	0	0	0	0	0	0	0	0	0	0	0	0	0	0	0	0
Celastrales	Celastraceae	Elaeodendron quadrangulatum	Mart.	1	Not assessed	0	0	0	0	0	0	0	0	0	0	0	0	0	0	0	0	0	0	0	0	0	0	0	0	0	0	0	0	0	0	0	0	0	0	1	0	0	0	0	0	0	0	0	0
Celastrales	Celastraceae	Elaeodendron transvaalense	(Burtt Davy) R.H.Archer	2	Not assessed	0	0	0	0	0	0	0	0	0	0	0	0	0	0	0	0	0	0	0	0	1	1	0	0	0	0	0	0	0	0	0	0	0	0	0	0	0	0	0	0	0	0	0	0
Celastrales	Celastraceae	Elaeodendron zeyheri	Spreng. ex Turcz.	1	Not assessed	0	0	0	0	0	0	0	0	0	0	0	0	0	0	0	0	0	0	0	0	0	1	0	0	0	0	0	0	0	0	0	0	0	0	0	0	0	0	0	0	0	0	0	0
Celastrales	Celastraceae	Elaeondendron croceum	(Thunb.) DC.	1	Least concern	0	0	0	0	0	0	0	0	0	0	0	0	0	0	0	0	0	0	0	0	0	1	0	0	0	0	0	0	0	0	0	0	0	0	0	0	0	0	0	0	0	0	0	0
Fabales	Fabaceae	Elephantorrhiza burkei	Benth.	2	Least concern	0	0	0	0	0	0	0	0	0	0	0	0	0	0	0	0	0	0	0	0	1	1	0	0	0	0	0	0	0	0	0	0	0	0	0	0	0	0	0	0	0	0	0	0
Fabales	Fabaceae	Elephantorrhiza elephantina	(Burch.) Skeels	1	Not assessed	0	0	0	0	0	0	0	0	0	0	0	0	0	0	0	0	0	0	0	0	0	1	0	0	0	0	0	0	0	0	0	0	0	0	0	0	0	0	0	0	0	0	0	0
Gentianales	Rubiaceae	Empogona africana	(Sim) J. Tosh & Robbr.	1	Vulnerable	0	0	0	0	0	0	0	0	0	0	0	0	0	0	0	0	0	0	0	0	0	1	0	0	0	0	0	0	0	0	0	0	0	0	0	0	0	0	0	0	0	0	0	0
Gentianales	Rubiaceae	Empogona coriacea	(Sond.) J. Tosh & Robbr.	1	Not assessed	0	0	0	0	0	0	0	0	0	0	0	0	0	0	0	0	0	0	0	0	0	1	0	0	0	0	0	0	0	0	0	0	0	0	0	0	0	0	0	0	0	0	0	0
Gentianales	Rubiaceae	Empogona lanceolata	(Sond.) J. Tosh & Robbr.	4	Not assessed	0	0	0	0	0	0	0	0	0	0	0	0	0	0	0	0	0	0	0	0	0	1	0	0	0	0	0	0	0	0	0	0	0	0	0	0	0	0	0	0	0	0	0	0
Ericales	Sapotaceae	Englerophytum magalismontanum	(Sond.) T.D. Penn.	8	Not assessed	0	0	0	0	0	0	0	0	0	0	0	0	0	0	0	0	0	0	0	1	1	1	0	0	0	0	0	0	0	0	0	0	0	0	0	0	0	0	0	0	0	0	0	0
Ericales	Sapotaceae	Englerophytum natalense	(Sond.) T.D. Penn.	7	Not assessed	0	0	0	0	0	0	0	0	0	0	0	0	0	0	0	0	0	0	0	0	1	1	0	0	0	0	0	0	0	0	0	0	0	0	0	0	0	0	0	0	0	0	0	0
Ericales	Ericaceae	Enkianthus campanulatus	(Miq.) G.Nicholson	1	Least concern	0	0	0	0	0	0	0	0	0	1	0	0	0	0	0	0	0	0	0	0	0	0	0	0	0	0	0	0	0	0	0	0	0	0	0	0	0	0	0	0	0	0	0	0
Sapindales	Meliaceae	Entandrophragma candollei	Harms	1	Not assessed	0	0	0	0	0	0	0	0	0	0	0	0	0	0	0	0	0	0	0	1	0	0	0	0	0	0	0	0	0	0	0	0	0	0	0	0	0	0	0	0	0	0	0	0
Sapindales	Meliaceae	Entandrophragma caudatum	(Sprague) Sprague	3	Least concern	0	0	0	0	0	0	0	0	0	0	0	0	0	0	0	0	0	0	0	0	1	1	0	0	0	0	0	0	0	0	0	0	0	0	0	0	0	0	0	0	0	0	0	0
Fabales	Fabaceae	Enterolobium contortisiliquum	(Vell.) Morong	1	Least concern	1	0	0	0	0	0	0	0	0	0	0	0	0	0	0	0	0	0	0	0	0	0	0	0	0	0	0	0	0	0	0	0	0	0	1	0	1	0	0	0	0	0	0	0
Fabales	Fabaceae	Enterolobium timbouva	Mart.	1	Not assessed	0	0	0	0	0	0	0	0	0	0	0	0	0	0	0	0	0	0	0	0	0	0	0	0	0	0	0	0	0	0	0	0	0	0	1	0	0	0	0	0	0	0	0	0
Gentianales	Apocynaceae	Ephippiocarpa orientalis	(S.Moore) Markgr.	1	Not assessed	0	0	0	0	0	0	0	0	0	0	0	0	0	0	0	0	0	0	1	0	1	1	0	0	0	0	0	0	0	0	0	0	0	0	0	0	0	0	0	0	0	0	0	0
Ericales	Ericaceae	Erica abietina subsp. atrorosea	E.G.H.Oliv. & I.M.Oliv.	1	Not assessed	0	0	0	0	0	0	0	0	0	0	0	0	0	0	0	0	0	0	0	0	0	0	0	0	0	0	0	0	0	0	0	0	0	0	0	0	0	0	1	0	0	0	0	0
Ericales	Ericaceae	Erica arborea	L.	1	Least concern	0	1	1	0	0	0	0	0	0	0	0	0	0	0	0	0	0	0	0	0	0	0	0	0	0	0	0	0	0	0	0	0	0	0	0	0	0	0	1	0	0	0	0	0
Ericales	Ericaceae	Erica baccans	L.	1	Not assessed	0	0	1	0	0	0	0	0	0	0	0	0	0	0	0	0	0	0	0	0	0	0	0	0	0	0	0	0	0	0	0	0	0	0	0	0	0	0	1	0	0	0	0	0
Ericales	Ericaceae	Erica baueri	Andrews	2	Not assessed	0	0	0	0	0	0	0	0	0	0	0	0	0	0	0	0	0	0	0	0	0	0	0	0	0	0	0	0	0	0	0	0	0	0	0	0	0	0	1	0	0	0	0	0
Ericales	Ericaceae	Erica blenna var. grandiflora	Bolus	1	Not assessed	0	0	0	0	0	0	0	0	0	0	0	0	0	0	0	0	0	0	0	0	0	0	0	0	0	0	0	0	0	0	0	0	0	0	0	0	0	0	1	0	0	0	0	0
Ericales	Ericaceae	Erica caffra	L.	4	Not assessed	0	0	1	0	0	0	0	0	0	0	0	0	0	0	0	0	0	0	0	0	0	1	0	0	0	0	0	0	0	0	0	0	0	0	0	0	0	0	1	0	0	0	0	0
Ericales	Ericaceae	Erica canaliculata	Andrews	1	Not assessed	0	0	0	0	0	0	0	0	0	0	0	0	0	0	0	0	0	0	0	0	0	0	0	0	0	0	0	0	0	0	0	0	0	0	0	0	0	0	1	0	0	0	0	0
Ericales	Ericaceae	Erica caterviflora var. caterviflora	Salisb.	2	Not assessed	0	0	0	0	0	0	0	0	0	0	0	0	0	0	0	0	0	0	0	0	0	0	0	0	0	0	0	0	0	0	0	0	0	0	0	0	0	0	1	0	0	0	0	0
Ericales	Ericaceae	Erica cerinthoides	L.	1	Not assessed	0	0	0	0	0	0	0	0	0	0	0	0	0	0	0	0	0	0	0	0	0	1	0	0	0	0	0	0	0	0	0	0	0	0	0	0	0	0	1	0	0	0	0	0
Ericales	Ericaceae	Erica coccinea	L.	1	Not assessed	0	0	0	0	0	0	0	0	0	0	0	0	0	0	0	0	0	0	0	0	0	0	0	0	0	0	0	0	0	0	0	0	0	0	0	0	0	0	1	0	0	0	0	0
Ericales	Ericaceae	Erica croceovirens	E.G.H.Oliv. & I.M.Oliv.	1	Not assessed	0	0	0	0	0	0	0	0	0	0	0	0	0	0	0	0	0	0	0	0	0	0	0	0	0	0	0	0	0	0	0	0	0	0	0	0	0	0	1	0	0	0	0	0
Ericales	Ericaceae	Erica curviflora	L.	1	Not assessed	0	0	0	0	0	0	0	0	0	0	0	0	0	0	0	0	0	0	0	0	0	1	0	0	0	0	0	0	0	0	0	0	0	0	0	0	0	0	1	0	0	0	0	0
Ericales	Ericaceae	Erica densifolia	Willd.	1	Not assessed	0	0	0	0	0	0	0	0	0	0	0	0	0	0	0	0	0	0	0	0	0	0	0	0	0	0	0	0	0	0	0	0	0	0	0	0	0	0	1	0	0	0	0	0
Ericales	Ericaceae	Erica discolor	Andrews	1	Not assessed	0	0	0	0	0	0	0	0	0	0	0	0	0	0	0	0	0	0	0	0	0	1	0	0	0	0	0	0	0	0	0	0	0	0	0	0	0	0	1	0	0	0	0	0
Ericales	Ericaceae	Erica glomiflora	Salisb.	1	Not assessed	0	0	0	0	0	0	0	0	0	0	0	0	0	0	0	0	0	0	0	0	0	0	0	0	0	0	0	0	0	0	0	0	0	0	0	0	0	0	1	0	0	0	0	0
Ericales	Ericaceae	Erica glomiflora cv. 'Monique'	Salisb.	1	NA	0	0	0	0	0	0	0	0	0	0	0	0	0	0	0	0	0	0	0	0	0	0	0	0	0	0	0	0	0	0	0	0	0	0	0	0	0	0	0	0	0	0	0	0
Ericales	Ericaceae	Erica mammosa	L.	2	Not assessed	0	0	0	0	0	0	0	0	0	0	0	0	0	0	0	0	0	0	0	0	0	0	0	0	0	0	0	0	0	0	0	0	0	0	0	0	0	0	1	0	0	0	0	0
Ericales	Ericaceae	Erica monsoniana	L.f.	1	Not assessed	0	0	0	0	0	0	0	0	0	0	0	0	0	0	0	0	0	0	0	0	0	0	0	0	0	0	0	0	0	0	0	0	0	0	0	0	0	0	1	0	0	0	0	0
Ericales	Ericaceae	Erica patersonii x nana cv. 'Gengold'	NA	1	NA	0	0	0	0	0	0	0	0	0	0	0	0	0	0	0	0	0	0	0	0	0	0	0	0	0	0	0	0	0	0	0	0	0	0	0	0	0	0	0	0	0	0	0	0
Ericales	Ericaceae	Erica peziza	Lodd.	1	Not assessed	0	0	0	0	0	0	0	0	0	0	0	0	0	0	0	0	0	0	0	0	0	0	0	0	0	0	0	0	0	0	0	0	0	0	0	0	0	0	1	0	0	0	0	0
Ericales	Ericaceae	Erica plukenetii	P.J.Bergius	1	Not assessed	0	0	0	0	0	0	0	0	0	0	0	0	0	0	0	0	0	0	0	0	0	1	0	0	0	0	0	0	0	0	0	0	0	0	0	0	0	0	1	0	0	0	0	0
Ericales	Ericaceae	Erica scabruiscula	Lodd.	1	Not assessed	0	0	0	0	0	0	0	0	0	0	0	0	0	0	0	0	0	0	0	0	0	0	0	0	0	0	0	0	0	0	0	0	0	0	0	0	0	0	1	0	0	0	0	0
Ericales	Ericaceae	Erica sessiliflora	J.C.Wendl.	1	Not assessed	0	0	0	0	0	0	0	0	0	0	0	0	0	0	0	0	0	0	0	0	0	1	0	0	0	0	0	0	0	0	0	0	0	0	0	0	0	0	1	0	0	0	0	0
Ericales	Ericaceae	Erica tristis	Bartl.	1	Not assessed	0	0	0	0	0	0	0	0	0	0	0	0	0	0	0	0	0	0	0	0	0	0	0	0	0	0	0	0	0	0	0	0	0	0	0	0	0	0	1	0	0	0	0	0
Rosales	Rosaceae	Eriobotrya japonica	(Thunb.) Lindl.	9	Not assessed	1	0	1	1	1	0	0	0	0	1	0	0	0	0	0	0	0	0	0	0	0	0	0	0	0	0	0	0	0	0	0	0	0	0	0	0	0	0	0	0	0	0	0	0
Fabales	Fabaceae	Erythrina abyssinica	Lam.	6	Not assessed	0	0	0	0	0	0	0	0	0	0	0	0	0	0	0	0	0	0	1	1	0	0	0	0	0	0	0	0	0	0	0	0	0	0	0	0	0	0	0	0	0	0	0	0
Fabales	Fabaceae	Erythrina acanthocarpa	E.Mey.	1	Not assessed	0	0	0	0	0	0	0	0	0	0	0	0	0	0	0	0	0	0	0	0	0	1	0	0	0	0	0	0	0	0	0	0	0	0	0	0	0	0	0	0	0	0	0	0
Fabales	Fabaceae	Erythrina caffra	Thunb.	19	Not assessed	0	0	0	0	1	1	0	0	0	0	0	0	0	0	0	0	0	0	0	0	0	1	0	0	0	0	0	0	0	0	0	0	0	0	0	0	0	0	0	0	0	0	0	0
Fabales	Fabaceae	Erythrina crista-galli	L.	6	Not assessed	0	0	1	0	1	0	0	0	0	0	0	0	0	0	0	0	0	0	0	0	0	0	0	0	0	0	0	0	0	0	0	0	0	0	1	0	1	0	0	0	0	0	0	0
Fabales	Fabaceae	Erythrina decora	Harms.	1	Not assessed	0	0	0	0	0	0	0	0	0	0	0	0	0	0	0	0	0	0	0	0	0	1	0	0	0	0	0	0	0	0	0	0	0	0	0	0	0	0	0	0	0	0	0	0
Fabales	Fabaceae	Erythrina falcata	Benth.	1	Least concern	0	0	0	0	0	0	0	0	0	0	0	0	0	0	0	0	0	0	0	0	0	0	0	0	0	0	0	0	0	0	0	0	0	0	1	0	1	0	0	0	0	0	0	0
Fabales	Fabaceae	Erythrina fusca	Lour.	1	Not assessed	0	0	0	0	0	0	0	0	0	0	0	0	0	0	0	0	0	0	0	0	1	0	1	0	1	1	0	0	0	1	0	1	1	0	1	0	0	0	0	0	0	0	0	0
Fabales	Fabaceae	Erythrina humeana	Spreng.	8	Not assessed	0	0	0	0	1	0	0	0	0	0	0	0	0	0	0	0	0	0	0	0	0	1	0	0	0	0	0	0	0	0	0	0	0	0	0	0	0	0	0	0	0	0	0	0
Fabales	Fabaceae	Erythrina latissima	E.Mey.	11	Not assessed	0	0	0	0	0	0	0	0	0	0	0	0	0	0	0	0	0	0	0	0	1	1	0	0	0	0	0	0	0	0	0	0	0	0	0	0	0	0	0	0	0	0	0	0
Fabales	Fabaceae	Erythrina livingstoniana	Baker	2	Not assessed	0	0	0	0	1	0	0	0	0	0	0	0	0	0	0	0	0	0	0	0	1	0	0	0	0	0	0	0	0	0	0	0	0	0	0	0	0	0	0	0	0	0	0	0
Fabales	Fabaceae	Erythrina lysistemon	Hutch.	27	Not assessed	0	0	0	0	1	0	0	0	0	0	0	0	0	0	0	0	0	0	0	0	1	1	0	0	0	0	0	0	0	0	0	0	0	0	0	0	0	0	0	0	0	0	0	0
Fabales	Fabaceae	Erythrina madagascariensis	Du Puy & Labat	1	Least concern	0	0	0	0	0	0	0	0	0	0	0	0	0	0	0	0	0	0	0	0	0	0	1	0	0	0	0	0	0	0	0	0	0	0	0	0	0	0	0	0	0	0	0	0
Fabales	Fabaceae	Erythrina pallida	Britton & Rose	1	Not assessed	0	0	0	0	0	0	0	0	0	0	0	0	0	0	0	0	0	0	0	0	0	0	0	0	0	0	0	0	0	0	0	1	0	0	0	0	0	0	0	0	0	0	0	0
Fabales	Fabaceae	Erythrina tahitensis	Nadeaud	1	Critically endangered	0	0	0	0	0	0	0	0	0	0	0	0	0	0	0	0	0	0	0	0	0	0	0	0	0	0	0	0	0	1	0	0	0	0	0	0	0	0	0	0	0	0	0	0
Fabales	Fabaceae	Erythrina zeyheri	Harv.	4	Not assessed	0	0	0	0	0	0	0	0	0	0	0	0	0	0	0	0	0	0	0	0	1	1	0	0	0	0	0	0	0	0	0	0	0	0	0	0	0	0	0	0	0	0	0	0
Fabales	Fabaceae	Erythrophleum lasianthum	Corbishley	5	Not assessed	0	0	0	0	0	0	0	0	0	0	0	0	0	0	0	0	0	0	0	0	0	1	0	0	0	0	0	0	0	0	0	0	0	0	0	0	0	0	0	0	0	0	0	0
Fabales	Fabaceae	Erythrophleum suaveolens	(Guill. & Perr.) Brenan	1	Not assessed	0	0	0	0	0	0	0	0	0	0	0	0	0	0	0	0	0	1	0	1	1	0	0	0	0	0	0	0	0	0	0	0	0	0	0	0	0	0	0	0	0	0	0	0
Sapindales	Sapindaceae	Erythrophysa alata	(Eckl. & Zeyh.) Hutch.	1	Not assessed	0	0	0	0	0	0	0	0	0	0	0	0	0	0	0	0	0	0	0	0	0	1	0	0	0	0	0	0	0	0	0	0	0	0	0	0	0	0	0	0	0	0	0	0
Sapindales	Sapindaceae	Erythrophysa transvaalensis	Verdc.	3	Least concern	0	0	0	0	0	0	0	0	0	0	0	0	0	0	0	0	0	0	0	0	0	1	0	0	0	0	0	0	0	0	0	0	0	0	0	0	0	0	0	0	0	0	0	0
Malpighiales	Erythroxylaceae	Erythroxylum coca	Lam.	1	Not assessed	0	0	0	0	0	0	0	0	0	0	0	0	0	0	0	0	0	0	0	0	0	0	0	0	0	0	0	0	0	0	0	0	0	1	1	1	0	0	0	0	0	0	0	0
Malpighiales	Erythroxylaceae	Erythroxylum delagoense	Schinz	2	Not assessed	0	0	0	0	0	0	0	0	0	0	0	0	0	0	0	0	0	0	0	0	0	1	0	0	0	0	0	0	0	0	0	0	0	0	0	0	0	0	0	0	0	0	0	0
Malpighiales	Erythroxylaceae	Erythroxylum emarginatum	Thonn.	2	Least concern	0	0	0	0	0	0	0	0	0	0	0	0	0	0	0	0	0	0	0	1	1	1	0	0	0	0	0	0	0	0	0	0	0	0	0	0	0	0	0	0	0	0	0	0
Malpighiales	Erythroxylaceae	Erythroxylum pictum	E.Mey ex Sond.	2	Vulnerable	0	0	0	0	0	0	0	0	0	0	0	0	0	0	0	0	0	0	0	0	0	1	0	0	0	0	0	0	0	0	0	0	0	0	0	0	0	0	0	0	0	0	0	0
Escalloniales	Escalloniaceae	Escallonia × exoniensis cv. 'Fradesii'	Veitch	1	NA	0	0	0	0	0	0	0	0	0	0	0	0	0	0	0	0	0	0	0	0	0	0	0	0	0	0	0	0	0	0	0	0	0	0	0	0	0	0	0	0	0	0	0	0
Myrtales	Myrtaceae	Eucalyptus acmenoides	Schauer	1	Least concern	0	0	0	0	0	0	0	0	0	0	0	0	0	0	0	0	0	0	0	0	0	0	0	0	0	0	0	0	0	0	0	0	0	0	0	0	0	0	0	1	0	0	0	0
Myrtales	Myrtaceae	Eucalyptus andrewsii subsp. andrewsii	Maiden	1	Least concern	0	0	0	0	0	0	0	0	0	0	0	0	0	0	0	0	0	0	0	0	0	0	0	0	0	0	0	0	0	0	0	0	0	0	0	0	0	0	0	1	0	0	0	0
Myrtales	Myrtaceae	Eucalyptus botryoides	Sm.	2	Near threatened	1	0	0	0	0	0	0	0	0	0	0	0	0	0	0	0	0	0	0	0	0	0	0	0	0	0	0	0	0	0	0	0	0	0	0	0	0	0	0	1	0	0	0	0
Myrtales	Myrtaceae	Eucalyptus caesia	Benth.	1	Least concern	0	0	0	0	0	0	0	0	0	0	0	0	0	0	0	0	0	0	0	0	0	0	0	0	0	0	0	0	0	0	0	0	0	0	0	0	0	0	0	0	1	0	0	0
Myrtales	Myrtaceae	Eucalyptus camaldulensis	Dehnh.	5	Near threatened	1	0	1	0	0	0	0	0	0	0	0	0	0	0	0	0	0	0	0	0	0	0	0	0	0	0	0	0	0	0	0	0	0	0	0	0	0	0	0	1	0	0	0	0
Myrtales	Myrtaceae	Eucalyptus camphora	R.T. Baker	1	Near threatened	0	0	0	0	0	0	0	0	0	0	0	0	0	0	0	0	0	0	0	0	0	0	0	0	0	0	0	0	0	0	0	0	0	0	0	0	0	0	0	1	0	0	0	0
Myrtales	Myrtaceae	Eucalyptus cinerea	Benth.	8	Not assessed	0	0	1	0	0	0	0	0	0	0	0	0	0	0	0	0	0	0	0	0	0	0	0	0	0	0	0	0	0	0	0	0	0	0	0	0	0	0	0	1	0	0	0	0
Myrtales	Myrtaceae	Eucalyptus cladocalyx	F.Muell.	4	Vulnerable	1	1	1	0	0	0	0	0	0	0	0	0	0	0	0	0	0	0	0	0	0	0	0	0	0	0	0	0	0	0	0	0	0	0	0	0	0	0	0	0	0	1	0	0
Myrtales	Myrtaceae	Eucalyptus cloeziana	F.Muell.	1	Least concern	1	0	0	0	0	0	0	0	0	0	0	0	0	0	0	0	0	0	0	0	0	0	0	0	0	0	0	0	0	0	0	0	0	0	0	0	0	0	0	1	0	0	0	0
Myrtales	Myrtaceae	Eucalyptus conica	H.Deane & Maiden	1	Vulnerable	0	0	0	0	0	0	0	0	0	0	0	0	0	0	0	0	0	0	0	0	0	0	0	0	0	0	0	0	0	0	0	0	0	0	0	0	0	0	0	1	0	0	0	0
Myrtales	Myrtaceae	Eucalyptus deglupta	Blume	4	Vulnerable	0	0	0	0	0	0	0	0	0	0	0	0	0	0	0	0	0	0	0	0	0	0	0	0	0	0	1	0	0	0	0	0	0	0	0	0	0	0	0	0	0	0	0	0
Myrtales	Myrtaceae	Eucalyptus diversicolor	F.Muell.	2	Least concern	1	1	0	0	0	0	0	0	0	0	0	0	0	0	0	0	0	0	0	0	0	0	0	0	0	0	0	0	0	0	0	0	0	0	0	0	0	0	0	0	1	0	0	0
Myrtales	Myrtaceae	Eucalyptus exserta	F.Muell.	1	Vulnerable	1	0	0	0	0	0	0	0	0	0	0	0	0	0	0	0	0	0	0	0	0	0	0	0	0	0	0	0	0	0	0	0	0	0	0	0	0	0	0	1	0	0	0	0
Myrtales	Myrtaceae	Eucalyptus fastigata	H.Deane & Maiden	3	Least concern	1	0	0	0	0	0	0	0	0	0	0	0	0	0	0	0	0	0	0	0	0	0	0	0	0	0	0	0	0	0	0	0	0	0	0	0	0	0	0	1	0	0	0	0
Myrtales	Myrtaceae	Eucalyptus fraxinoides	H.Deane & Maiden	1	Least concern	0	0	0	0	0	0	0	0	0	0	0	0	0	0	0	0	0	0	0	0	0	0	0	0	0	0	0	0	0	0	0	0	0	0	0	0	0	0	0	1	0	0	0	0
Myrtales	Myrtaceae	Eucalyptus globoidea	Blakely	1	Near threatened	0	0	0	0	0	0	0	0	0	0	0	0	0	0	0	0	0	0	0	0	0	0	0	0	0	0	0	0	0	0	0	0	0	0	0	0	0	0	0	1	0	0	0	0
Myrtales	Myrtaceae	Eucalyptus globulus	Labill.	4	Least concern	1	1	1	0	0	0	0	0	0	0	0	0	0	0	0	0	0	0	0	0	0	0	0	0	0	0	0	0	0	0	0	0	0	0	0	0	0	0	0	1	0	0	0	0
Myrtales	Myrtaceae	Eucalyptus globulus subsp. maidenii	(F.Muell.) J.B. Kirkp.	1	Not assessed	0	0	0	0	0	0	0	0	0	0	0	0	0	0	0	0	0	0	0	0	0	0	0	0	0	0	0	0	0	0	0	0	0	0	0	0	0	0	0	1	0	0	0	0
Myrtales	Myrtaceae	Eucalyptus gomphocephala	DC.	2	Vulnerable	1	0	0	0	0	0	0	0	0	0	0	0	0	0	0	0	0	0	0	0	0	0	0	0	0	0	0	0	0	0	0	0	0	0	0	0	0	0	0	0	1	0	0	0
Myrtales	Myrtaceae	Eucalyptus goniocalyx	Miq.	1	Vulnerable	0	0	0	0	0	0	0	0	0	0	0	0	0	0	0	0	0	0	0	0	0	0	0	0	0	0	0	0	0	0	0	0	0	0	0	0	0	0	0	1	0	0	0	0
Myrtales	Myrtaceae	Eucalyptus grandis	W.Hill ex Maiden	16	Near threatened	1	0	1	0	0	0	0	0	0	0	0	0	0	0	0	0	0	0	0	0	0	0	0	0	0	0	0	0	0	0	0	0	0	0	0	0	0	0	0	1	0	0	0	0
Myrtales	Myrtaceae	Eucalyptus laevopinea	R.T.Baker	1	Not assessed	0	0	0	0	0	0	0	0	0	0	0	0	0	0	0	0	0	0	0	0	0	0	0	0	0	0	0	0	0	0	0	0	0	0	0	0	0	0	0	1	0	0	0	0
Myrtales	Myrtaceae	Eucalyptus leucoxylon	F.Muell.	3	Vulnerable	1	0	0	0	0	0	0	0	0	0	0	0	0	0	0	0	0	0	0	0	0	0	0	0	0	0	0	0	0	0	0	0	0	0	0	0	0	0	0	1	0	1	0	0
Myrtales	Myrtaceae	Eucalyptus leucoxylon subsp. pruinosa	(F.Muell. ex Miq.) Boland	2	Not assessed	0	0	0	0	0	0	0	0	0	0	0	0	0	0	0	0	0	0	0	0	0	0	0	0	0	0	0	0	0	0	0	0	0	0	0	0	0	0	0	1	0	0	0	0
Myrtales	Myrtaceae	Eucalyptus longifolia	Link	1	Vulnerable	0	0	0	0	0	0	0	0	0	0	0	0	0	0	0	0	0	0	0	0	0	0	0	0	0	0	0	0	0	0	0	0	0	0	0	0	0	0	0	1	0	0	0	0
Myrtales	Myrtaceae	Eucalyptus macarthurii	H.Deane & Maiden	2	Vulnerable	0	0	0	0	0	0	0	0	0	0	0	0	0	0	0	0	0	0	0	0	0	0	0	0	0	0	0	0	0	0	0	0	0	0	0	0	0	0	0	1	0	0	0	0
Myrtales	Myrtaceae	Eucalyptus melliodora	A.Cunn. Ex Schauer	1	Vulnerable	1	0	0	0	0	0	0	0	0	0	0	0	0	0	0	0	0	0	0	0	0	0	0	0	0	0	0	0	0	0	0	0	0	0	0	0	0	0	0	1	0	0	0	0
Myrtales	Myrtaceae	Eucalyptus microcorys	F.Muell.	2	Near threatened	1	0	0	0	0	0	0	0	0	0	0	0	0	0	0	0	0	0	0	0	0	0	0	0	0	0	0	0	0	0	0	0	0	0	0	0	0	0	0	1	0	0	0	0
Myrtales	Myrtaceae	Eucalyptus nicholii	Maiden & Blakely	1	Vulnerable	0	0	0	0	0	0	0	0	0	0	0	0	0	0	0	0	0	0	0	0	0	0	0	0	0	0	0	0	0	0	0	0	0	0	0	0	0	0	0	1	0	0	0	0
Myrtales	Myrtaceae	Eucalyptus nitens	(H.Deane & Maiden) Maiden	2	Least concern	0	0	0	0	0	0	0	0	0	0	0	0	0	0	0	0	0	0	0	0	0	0	0	0	0	0	0	0	0	0	0	0	0	0	0	0	0	0	0	1	0	0	0	0
Myrtales	Myrtaceae	Eucalyptus obliqua	L'Her.	2	Near threatened	0	0	0	0	0	0	0	0	0	0	0	0	0	0	0	0	0	0	0	0	0	0	0	0	0	0	0	0	0	0	0	0	0	0	0	0	0	0	0	1	0	0	0	0
Myrtales	Myrtaceae	Eucalyptus paniculata	Sm.	7	Near threatened	1	0	0	0	0	0	0	0	0	0	0	0	0	0	0	0	0	0	0	0	0	0	0	0	0	0	0	0	0	0	0	0	0	0	0	0	0	0	0	1	0	0	0	0
Myrtales	Myrtaceae	Eucalyptus pauciflora subsp. niphophila	(Maiden & Blakely) L.A.S.Johnson & Blaxell	1	Not assessed	0	0	0	0	0	0	0	0	0	0	0	0	0	0	0	0	0	0	0	0	0	0	0	0	0	0	0	0	0	0	0	0	0	0	0	0	0	0	0	1	0	0	0	0
Myrtales	Myrtaceae	Eucalyptus pilularis	Sm.	2	Near threatened	0	0	0	0	0	0	0	0	0	0	0	0	0	0	0	0	0	0	0	0	0	0	0	0	0	0	0	0	0	0	0	0	0	0	0	0	0	0	0	1	0	0	0	0
Myrtales	Myrtaceae	Eucalyptus radiata	Sieber ex DC.	2	Near threatened	0	0	0	0	0	0	0	0	0	0	0	0	0	0	0	0	0	0	0	0	0	0	0	0	0	0	0	0	0	0	0	0	0	0	0	0	0	0	0	1	0	0	0	0
Myrtales	Myrtaceae	Eucalyptus radiata subsp. robertsonii	(Blakely) L.A.S.Johnson & K.D.Hill	1	Near threatened	0	0	0	0	0	0	0	0	0	0	0	0	0	0	0	0	0	0	0	0	0	0	0	0	0	0	0	0	0	0	0	0	0	0	0	0	0	0	0	1	0	0	0	0
Myrtales	Myrtaceae	Eucalyptus regnans	F.Muell.	1	Least concern	1	0	0	0	0	0	0	0	0	0	0	0	0	0	0	0	0	0	0	0	0	0	0	0	0	0	0	0	0	0	0	0	0	0	0	0	0	0	0	1	0	0	0	0
Myrtales	Myrtaceae	Eucalyptus resinifera	Sm.	1	Least concern	0	0	0	0	0	0	0	0	0	0	0	0	0	0	0	0	0	0	0	0	0	0	0	0	0	0	0	0	0	0	0	0	0	0	0	0	0	0	0	1	0	0	0	0
Myrtales	Myrtaceae	Eucalyptus robusta	Sm.	2	Near threatened	0	0	1	0	0	0	0	0	0	0	0	0	0	0	0	0	0	0	0	0	0	0	0	0	0	0	0	0	0	0	0	0	0	0	0	0	0	0	0	1	0	0	0	0
Myrtales	Myrtaceae	Eucalyptus saligna	Sm.	3	Least concern	0	0	0	0	0	0	0	0	0	0	0	0	0	0	0	0	0	0	0	0	0	0	0	0	0	0	0	0	0	0	0	0	0	0	0	0	0	0	0	1	0	0	0	0
Myrtales	Myrtaceae	Eucalyptus sideroxylon	A.Cunn. ex Woolls	14	Least concern	1	0	0	0	0	0	0	0	0	0	0	0	0	0	0	0	0	0	0	0	0	0	0	0	0	0	0	0	0	0	0	0	0	0	0	0	0	0	0	1	0	0	0	0
Myrtales	Myrtaceae	Eucalyptus sieberi	L.A.S.Johnson	1	Least concern	0	0	0	0	0	0	0	0	0	0	0	0	0	0	0	0	0	0	0	0	0	0	0	0	0	0	0	0	0	0	0	0	0	0	0	0	0	0	0	1	0	0	0	0
Myrtales	Myrtaceae	Eucalyptus tereticornis	Sm.	3	Least concern	1	0	0	0	0	0	0	0	0	0	0	0	0	0	0	0	0	0	0	0	0	0	0	0	0	0	0	0	0	0	0	0	0	0	0	0	0	0	0	1	0	0	0	0
Myrtales	Myrtaceae	Eucalyptus viminalis	Labill.	1	Not assessed	0	0	0	0	0	0	0	0	0	0	0	0	0	0	0	0	0	0	0	0	0	0	0	0	0	0	0	0	0	0	0	0	0	0	0	0	0	0	0	1	0	0	0	0
Ericales	Ebenaceae	Euclea coriacea	A.DC.	1	Not assessed	0	0	0	0	0	0	0	0	0	0	0	0	0	0	0	0	0	0	0	0	1	1	0	0	0	0	0	0	0	0	0	0	0	0	0	0	0	0	0	0	0	0	0	0
Ericales	Ebenaceae	Euclea crispa	(Thunb.) Gürke	11	Not assessed	0	0	0	0	0	0	0	0	0	0	0	0	0	0	0	0	0	0	0	0	1	1	0	0	0	0	0	0	0	0	0	0	0	0	0	0	0	0	0	0	0	0	0	0
Ericales	Ebenaceae	Euclea divinorum	Hiern	3	Not assessed	0	0	0	0	0	0	0	0	0	0	0	0	0	0	0	0	0	1	1	1	1	1	0	0	0	0	0	0	0	0	0	0	0	0	0	0	0	0	0	0	0	0	0	0
Ericales	Ebenaceae	Euclea linearis	Zeyh. ex Hiern	1	Not assessed	0	0	0	0	0	0	0	0	0	0	0	0	0	0	0	0	0	0	0	0	0	1	0	0	0	0	0	0	0	0	0	0	0	0	0	0	0	0	1	0	0	0	0	0
Ericales	Ebenaceae	Euclea natalensis	A.DC.	7	Least concern	0	0	0	0	0	0	0	0	0	0	0	0	0	0	0	0	0	0	0	0	0	1	0	0	0	0	0	0	0	0	0	0	0	0	0	0	0	0	0	0	0	0	0	0
Ericales	Ebenaceae	Euclea natalensis subsp. acutifolia	F.White	1	Not assessed	0	0	0	0	0	0	0	0	0	0	0	0	0	0	0	0	0	0	0	0	1	0	0	0	0	0	0	0	0	0	0	0	0	0	0	0	0	0	0	0	0	0	0	0
Ericales	Ebenaceae	Euclea natalensis subsp. angustifolia	F.White	1	Not assessed	0	0	0	0	0	0	0	0	0	0	0	0	0	0	0	0	0	0	0	0	0	1	0	0	0	0	0	0	0	0	0	0	0	0	0	0	0	0	0	0	0	0	0	0
Ericales	Ebenaceae	Euclea natalensis subsp. obovata	F. White	1	Not assessed	0	0	0	0	0	0	0	0	0	0	0	0	0	0	0	0	0	0	1	0	1	1	0	0	0	0	0	0	0	0	0	0	0	0	0	0	0	0	0	0	0	0	0	0
Ericales	Ebenaceae	Euclea pseudebenus	E.Mey. ex A.DC.	2	Least concern	0	0	0	0	0	0	0	0	0	0	0	0	0	0	0	0	0	0	0	0	1	1	0	0	0	0	0	0	0	0	0	0	0	0	0	0	0	0	0	0	0	0	0	0
Ericales	Ebenaceae	Euclea racemosa	L.	1	Not assessed	0	0	0	0	0	0	0	0	0	0	0	0	0	0	0	0	0	1	1	1	1	1	0	0	0	0	0	0	0	0	0	0	0	0	0	0	0	0	0	0	0	0	0	0
Ericales	Ebenaceae	Euclea racemosa subsp. schimperi	(A.DC.) F.White	1	Not assessed	0	0	0	0	0	0	0	0	0	0	0	0	0	0	0	0	1	1	1	1	1	1	0	0	0	0	0	0	0	0	0	0	0	0	0	0	0	0	0	0	0	0	0	0
Ericales	Ebenaceae	Euclea schimperi	(A.DC.) Dandy	1	Not assessed	0	0	0	0	0	0	0	0	0	0	0	0	0	0	0	0	0	0	1	0	1	1	0	0	0	0	0	0	0	0	0	0	0	0	0	0	0	0	0	0	0	0	0	0
Ericales	Ebenaceae	Euclea tomentosa	E.Mey. ex A.DC.	1	Least concern	0	0	0	0	0	0	0	0	0	0	0	0	0	0	0	0	0	0	0	0	0	1	0	0	0	0	0	0	0	0	0	0	0	0	0	0	0	0	0	0	0	0	0	0
Ericales	Ebenaceae	Euclea undulata	Thunb.	5	Least concern	0	0	0	0	0	0	0	0	0	0	0	0	0	0	0	0	0	0	0	0	1	1	0	0	0	0	0	0	0	0	0	0	0	0	0	0	0	0	0	0	0	0	0	0
Myrtales	Myrtaceae	Eugenia brasiliensis	Lam.	3	Not assessed	0	0	1	0	0	0	0	0	0	0	0	0	0	0	0	0	0	0	0	0	0	0	0	0	0	0	0	0	0	0	0	0	0	0	1	0	0	0	0	0	0	0	0	0
Myrtales	Myrtaceae	Eugenia capensis	(Eckl. & Zeyh.) Sond.	1	Not assessed	0	0	0	0	0	0	0	0	0	0	0	0	0	0	0	0	0	0	0	0	0	1	0	0	0	0	0	0	0	0	0	0	0	0	0	0	0	0	0	0	0	0	0	0
Myrtales	Myrtaceae	Eugenia capensis subsp. zeyheri	(Harv.) F.White	1	Not assessed	0	0	0	0	0	0	0	0	0	0	0	0	0	0	0	0	0	0	0	0	0	1	0	0	0	0	0	0	0	0	0	0	0	0	0	0	0	0	0	0	0	0	0	0
Myrtales	Myrtaceae	Eugenia erythrophylla	Strey	2	Near threatened	0	0	0	0	0	0	0	0	0	0	0	0	0	0	0	0	0	0	0	0	0	1	0	0	0	0	0	0	0	0	0	0	0	0	0	0	0	0	0	0	0	0	0	0
Myrtales	Myrtaceae	Eugenia mespiloides	Lam.	1	Not assessed	0	0	0	0	0	0	0	0	0	0	0	0	0	0	0	0	0	0	0	0	0	0	1	0	0	0	0	0	0	0	0	0	0	0	0	0	0	0	0	0	0	0	0	0
Myrtales	Myrtaceae	Eugenia natalitia	Sond.	3	Not assessed	0	0	0	0	0	0	0	0	0	0	0	0	0	0	0	0	0	0	0	0	1	1	0	0	0	0	0	0	0	0	0	0	0	0	0	0	0	0	0	0	0	0	0	0
Myrtales	Myrtaceae	Eugenia simii	Dümmer	2	Not assessed	0	0	0	0	0	0	0	0	0	0	0	0	0	0	0	0	0	0	0	0	0	1	0	0	0	0	0	0	0	0	0	0	0	0	0	0	0	0	0	0	0	0	0	0
Myrtales	Myrtaceae	Eugenia umtamvunensis	A.E. van Wyk	2	Vulnerable	0	0	0	0	0	0	0	0	0	0	0	0	0	0	0	0	0	0	0	0	0	1	0	0	0	0	0	0	0	0	0	0	0	0	0	0	0	0	0	0	0	0	0	0
Myrtales	Myrtaceae	Eugenia uniflora	L.	3	Not assessed	1	1	1	1	0	0	0	0	0	0	0	0	0	0	0	0	0	0	0	0	0	0	0	0	0	0	0	0	0	0	0	0	0	0	1	0	1	0	0	0	0	0	0	0
Myrtales	Myrtaceae	Eugenia verdoorniae	A.E. van Wyk	2	Near threatened	0	0	0	0	0	0	0	0	0	0	0	0	0	0	0	0	0	0	0	0	0	1	0	0	0	0	0	0	0	0	0	0	0	0	0	0	0	0	0	0	0	0	0	0
Myrtales	Myrtaceae	Eugenia woodii	Dümmer	1	Not assessed	0	0	0	0	0	0	0	0	0	0	0	0	0	0	0	0	0	0	0	0	0	1	0	0	0	0	0	0	0	0	0	0	0	0	0	0	0	0	0	0	0	0	0	0
Myrtales	Myrtaceae	Eugenia zeyheri	Harv.	3	Data deficient	0	0	0	0	0	0	0	0	0	0	0	0	0	0	0	0	0	0	0	0	0	1	0	0	0	0	0	0	0	0	0	0	0	0	0	0	0	0	0	0	0	0	0	0
Celastrales	Celastraceae	Euonymus japonicus	Thunb.	4	Not assessed	0	0	0	0	0	0	0	0	0	1	0	0	0	0	0	0	0	0	0	0	0	0	0	0	0	0	0	0	0	0	0	0	0	0	0	0	0	0	0	0	0	0	0	0
Malpighiales	Euphorbiaceae	Euphorbia bicompacta	Bruyns	1	Least concern	0	0	0	0	0	0	0	0	0	0	0	0	0	0	0	0	0	0	0	0	1	1	0	0	0	0	0	0	0	0	0	0	0	0	0	0	0	0	0	0	0	0	0	0
Malpighiales	Euphorbiaceae	Euphorbia confinalis	R.A.Dyer	4	Not assessed	0	0	0	0	0	0	0	0	0	0	0	0	0	0	0	0	0	0	0	0	0	1	0	0	0	0	0	0	0	0	0	0	0	0	0	0	0	0	0	0	0	0	0	0
Malpighiales	Euphorbiaceae	Euphorbia cooperi	N.E.Br. ex A.Berger	5	Least concern	0	0	0	0	0	0	0	0	0	0	0	0	0	0	0	0	0	0	0	0	1	1	0	0	0	0	0	0	0	0	0	0	0	0	0	0	0	0	0	0	0	0	0	0
Malpighiales	Euphorbiaceae	Euphorbia curvirama	R.A.Dyer	1	Not assessed	0	0	0	0	0	0	0	0	0	0	0	0	0	0	0	0	0	0	0	0	0	1	0	0	0	0	0	0	0	0	0	0	0	0	0	0	0	0	0	0	0	0	0	0
Malpighiales	Euphorbiaceae	Euphorbia evansii	Pax	2	Not assessed	0	0	0	0	0	0	0	0	0	0	0	0	0	0	0	0	0	0	0	0	0	1	0	0	0	0	0	0	0	0	0	0	0	0	0	0	0	0	0	0	0	0	0	0
Malpighiales	Euphorbiaceae	Euphorbia fortissima	L.C.Leach	1	Not assessed	0	0	0	0	0	0	0	0	0	0	0	0	0	0	0	0	0	0	0	1	1	0	0	0	0	0	0	0	0	0	0	0	0	0	0	0	0	0	0	0	0	0	0	0
Malpighiales	Euphorbiaceae	Euphorbia gracilicaulis	L.C.Leach	1	Least concern	0	0	0	0	0	0	0	0	0	0	0	0	0	0	0	0	0	0	0	0	1	0	0	0	0	0	0	0	0	0	0	0	0	0	0	0	0	0	0	0	0	0	0	0
Malpighiales	Euphorbiaceae	Euphorbia grandidens	Haw.	1	Least concern	0	0	0	0	0	0	0	0	0	0	0	0	0	0	0	0	0	0	0	0	0	1	0	0	0	0	0	0	0	0	0	0	0	0	0	0	0	0	0	0	0	0	0	0
Malpighiales	Euphorbiaceae	Euphorbia ingens	E.Mey. ex Boiss.	7	Not assessed	0	0	0	0	0	0	0	0	0	0	0	0	0	0	0	0	0	0	0	0	1	1	0	0	0	0	0	0	0	0	0	0	0	0	0	0	0	0	0	0	0	0	0	0
Malpighiales	Euphorbiaceae	Euphorbia intisy	Drake	1	Near threatened	0	0	0	0	0	0	0	0	0	0	0	0	0	0	0	0	0	0	0	0	0	0	1	0	0	0	0	0	0	0	0	0	0	0	0	0	0	0	0	0	0	0	0	0
Malpighiales	Euphorbiaceae	Euphorbia kamponii	Rauh & Petignat	1	Critically endangered	0	0	0	0	0	0	0	0	0	0	0	0	0	0	0	0	0	0	0	0	0	0	1	0	0	0	0	0	0	0	0	0	0	0	0	0	0	0	0	0	0	0	0	0
Malpighiales	Euphorbiaceae	Euphorbia pulcherrima	Willd.	2	Least concern	1	0	0	0	0	0	0	0	0	0	0	0	0	0	0	0	0	0	0	0	0	0	0	0	0	0	0	0	0	0	0	1	0	0	0	0	0	0	0	0	0	0	0	0
Malpighiales	Euphorbiaceae	Euphorbia sekukuniensis	R.A.Dyer	2	Near threatened	0	0	0	0	0	0	0	0	0	0	0	0	0	0	0	0	0	0	0	0	0	1	0	0	0	0	0	0	0	0	0	0	0	0	0	0	0	0	0	0	0	0	0	0
Malpighiales	Euphorbiaceae	Euphorbia stenoclada	Baill.	1	Least concern	0	0	0	0	0	0	0	0	0	0	0	0	0	0	0	0	0	0	0	0	0	0	1	0	0	0	0	0	0	0	0	0	0	0	0	0	0	0	0	0	0	0	0	0
Malpighiales	Euphorbiaceae	Euphorbia tirucalli	L.	12	Least concern	0	0	0	0	0	0	0	0	0	0	0	0	0	0	0	0	0	1	1	0	1	1	1	0	0	0	0	0	0	0	0	0	0	0	0	0	0	0	0	0	0	0	0	0
Malpighiales	Euphorbiaceae	Euphorbia triangularis	Desf.	2	Least concern	0	0	0	0	0	0	0	0	0	0	0	0	0	0	0	0	0	0	0	0	0	1	0	0	0	0	0	0	0	0	0	0	0	0	0	0	0	0	0	0	0	0	0	0
Malpighiales	Euphorbiaceae	Euphorbia trigona	Haw.	1	Not assessed	0	0	0	0	0	0	0	0	0	0	0	0	0	0	0	0	0	0	0	1	1	0	0	0	0	0	0	0	0	0	0	0	0	0	0	0	0	0	0	0	0	0	0	0
Fagales	Fagaceae	Fagus sylvatica	L.	8	Not assessed	0	0	1	0	1	0	0	1	0	0	0	1	0	0	0	0	0	0	0	0	0	0	0	0	0	0	0	0	0	0	0	0	0	0	0	0	0	0	0	0	0	0	0	0
Fagales	Fagaceae	Fagus sylvatica cv. 'Purpurea'	L.	4	NA	0	0	0	0	0	0	0	0	0	0	0	0	0	0	0	0	0	0	0	0	0	0	0	0	0	0	0	0	0	0	0	0	0	0	0	0	0	0	0	0	0	0	0	0
Fabales	Fabaceae	Faidherbia albida	(Delile) A.Chev.	13	Not assessed	0	0	0	0	0	0	0	0	0	0	0	0	0	0	0	0	0	1	1	1	1	1	0	0	0	0	0	0	0	0	0	0	0	0	0	0	0	0	0	0	0	0	0	0
Apiales	Araliaceae	Fatsia japonica	Decne. & Planch.	1	Not assessed	0	0	0	0	1	0	0	0	0	1	0	0	0	0	0	0	0	0	0	0	0	0	0	0	0	0	0	0	0	0	0	0	0	0	0	0	0	0	0	0	0	0	0	0
Proteales	Proteaceae	Faurea galpinii	E.Phillips	2	Not assessed	0	0	0	0	0	0	0	0	0	0	0	0	0	0	0	0	0	0	0	0	0	1	0	0	0	0	0	0	0	0	0	0	0	0	0	0	0	0	0	0	0	0	0	0
Proteales	Proteaceae	Faurea macnaughtonii	Phillips	3	Least concern	0	0	0	0	0	0	0	0	0	0	0	0	0	0	0	0	0	0	0	0	0	1	0	0	0	0	0	0	0	0	0	0	0	0	0	0	0	0	0	0	0	0	0	0
Proteales	Proteaceae	Faurea rochetiana	(A.Rich.) Chiov. Ex Pic.Serm.	3	Not assessed	0	0	0	0	0	0	0	0	0	0	0	0	0	0	0	0	0	1	1	1	1	1	0	0	0	0	0	0	0	0	0	0	0	0	0	0	0	0	0	0	0	0	0	0
Proteales	Proteaceae	Faurea saligna	Harv.	5	Not assessed	0	0	0	0	0	0	0	0	0	0	0	0	0	0	0	0	0	0	0	0	0	1	0	0	0	0	0	0	0	0	0	0	0	0	0	0	0	0	0	0	0	0	0	0
Lamiales	Bignoniaceae	Fernandoa abbreviata	Bidgood	1	Not assessed	0	0	0	0	0	0	0	0	0	0	0	0	0	0	0	0	0	0	0	0	1	0	0	0	0	0	0	0	0	0	0	0	0	0	0	0	0	0	0	0	0	0	0	0
Lamiales	Bignoniaceae	Fernandoa madagascariensis	(Baker) A.H. Gentry	1	Least concern	0	0	0	0	0	0	0	0	0	0	0	0	0	0	0	0	0	0	0	0	0	0	1	0	0	0	0	0	0	0	0	0	0	0	0	0	0	0	0	0	0	0	0	0
Lamiales	Bignoniaceae	Fernandoa magnifica	Seem.	3	Not assessed	0	0	0	0	0	0	0	0	0	0	0	0	0	0	0	0	0	0	0	0	1	0	0	0	0	0	0	0	0	0	0	0	0	0	0	0	0	0	0	0	0	0	0	0
Rosales	Moraceae	Ficus abutilifolia	(Miq.) Miq.	7	Not assessed	0	0	0	0	0	0	0	0	0	0	0	0	0	0	0	0	0	1	0	1	1	1	0	0	0	0	0	0	0	0	0	0	0	0	0	0	0	0	0	0	0	0	0	0
Rosales	Moraceae	Ficus annulata	Blume	1	Not assessed	0	0	0	0	0	0	0	0	0	0	0	0	0	0	0	0	0	0	0	0	0	0	0	0	0	1	1	0	0	0	0	0	0	0	0	0	0	0	0	0	0	0	0	0
Rosales	Moraceae	Ficus aspera	G.Forst.	2	Not assessed	0	0	0	0	0	0	0	0	0	0	0	0	0	0	0	0	0	0	0	0	0	0	0	0	0	0	0	0	0	1	0	0	0	0	0	0	0	0	0	0	0	0	0	0
Rosales	Moraceae	Ficus benghalensis	L.	3	Not assessed	0	0	1	0	0	0	0	0	0	0	0	0	0	0	0	0	0	0	0	0	0	0	0	0	1	0	0	0	0	0	0	0	0	0	0	0	0	0	0	0	0	0	0	0
Rosales	Moraceae	Ficus benjamina	L.	13	Least concern	0	0	1	0	1	0	0	0	0	1	0	0	0	0	0	0	0	0	0	0	0	0	0	0	1	1	1	0	0	0	0	0	0	0	0	0	0	0	0	1	0	0	0	0
Rosales	Moraceae	Ficus benjamina cv. 'Exotica'	L.	1	NA	0	0	0	0	0	0	0	0	0	0	0	0	0	0	0	0	0	0	0	0	0	0	0	0	0	0	0	0	0	0	0	0	0	0	0	0	0	0	0	0	0	0	0	0
Rosales	Moraceae	Ficus benjamina cv. 'Starlight'	L.	1	NA	0	0	0	0	0	0	0	0	0	0	0	0	0	0	0	0	0	0	0	0	0	0	0	0	0	0	0	0	0	0	0	0	0	0	0	0	0	0	0	0	0	0	0	0
Rosales	Moraceae	Ficus bizanae	Hutch. & Burtt Davy	2	Vulnerable	0	0	0	0	0	0	0	0	0	0	0	0	0	0	0	0	0	0	0	0	0	1	0	0	0	0	0	0	0	0	0	0	0	0	0	0	0	0	0	0	0	0	0	0
Rosales	Moraceae	Ficus bubu	Warb.	5	Not assessed	0	0	0	0	0	0	0	0	0	0	0	0	0	0	0	0	0	0	0	1	1	1	0	0	0	0	0	0	0	0	0	0	0	0	0	0	0	0	0	0	0	0	0	0
Rosales	Moraceae	Ficus burkei	(Miq.) Miq.	8	Not assessed	0	0	0	0	0	0	0	0	0	0	0	0	0	0	0	0	0	0	1	1	1	1	0	0	0	0	0	0	0	0	0	0	0	0	0	0	0	0	0	0	0	0	0	0
Rosales	Moraceae	Ficus burtt-davyi	Hutch.	4	Not assessed	0	0	0	0	0	0	0	0	0	0	0	0	0	0	0	0	0	1	1	1	1	1	0	0	0	0	0	0	0	0	0	0	0	0	0	0	0	0	0	0	0	0	0	0
Rosales	Moraceae	Ficus capreifolia	Delile	4	Not assessed	0	0	0	0	0	0	0	0	0	0	0	0	0	0	0	0	0	1	1	1	1	1	0	0	0	0	0	0	0	0	0	0	0	0	0	0	0	0	0	0	0	0	0	0
Rosales	Moraceae	Ficus carica	L.	7	Least concern	1	1	1	0	1	0	0	0	0	0	1	1	0	0	0	0	0	0	0	0	0	0	0	0	0	0	0	0	0	0	0	0	0	0	0	0	0	0	0	0	0	0	0	0
Rosales	Moraceae	Ficus cordata	Thunb.	2	Least concern	0	0	0	0	0	0	0	0	0	0	0	0	0	0	0	0	0	0	0	0	0	1	0	0	0	0	0	0	0	0	0	0	0	0	0	0	0	0	0	0	0	0	0	0
Rosales	Moraceae	Ficus cordata subsp. salicifolia	(Vahl) C.C. Berg	3	Not assessed	0	0	0	0	0	0	0	0	0	0	0	0	0	0	0	0	1	1	1	1	1	1	0	0	0	0	0	0	0	0	0	0	0	0	0	0	0	0	0	0	0	0	0	0
Rosales	Moraceae	Ficus cotinifolia	Kunth	1	Not assessed	0	0	0	0	0	0	0	0	0	0	0	0	0	0	0	0	0	0	0	0	0	0	0	0	0	0	0	0	0	0	0	1	0	0	0	0	0	0	0	0	0	0	0	0
Rosales	Moraceae	Ficus craterostoma	Warb. ex Mildbr. & Burret	5	Not assessed	0	0	0	0	0	0	0	0	0	0	0	0	0	0	0	0	0	0	0	1	1	1	0	0	0	0	0	0	0	0	0	0	0	0	0	0	0	0	0	0	0	0	0	0
Rosales	Moraceae	Ficus elastica	Roxb. ex Hornem.	8	Not assessed	1	0	0	0	0	0	0	0	0	0	0	0	0	0	0	0	0	0	0	0	0	0	0	0	1	1	0	0	0	0	0	0	0	0	0	0	0	0	0	0	0	0	0	0
Rosales	Moraceae	Ficus glumosa	Delile	4	Least concern	0	0	0	0	0	0	0	0	0	0	0	0	0	0	0	0	0	0	0	0	1	1	0	0	0	0	0	0	0	0	0	0	0	0	0	0	0	0	0	0	0	0	0	0
Rosales	Moraceae	Ficus ilicina	(Sond.) Miq.	1	Least concern	0	0	0	0	0	0	0	0	0	0	0	0	0	0	0	0	0	0	0	0	0	1	0	0	0	0	0	0	0	0	0	0	0	0	0	0	0	0	0	0	0	0	0	0
Rosales	Moraceae	Ficus ingens	(Miq.) Miq.	8	Not assessed	0	0	0	0	0	0	0	0	0	0	0	0	0	0	0	0	1	1	1	1	1	1	0	0	0	0	0	0	0	0	0	0	0	0	0	0	0	0	0	0	0	0	0	0
Rosales	Moraceae	Ficus lutea	Vahl	6	Not assessed	0	0	0	0	0	0	0	0	0	0	0	0	0	0	0	0	0	0	1	1	1	1	1	0	0	0	0	0	0	0	0	0	0	0	0	0	0	0	0	0	0	0	0	0
Rosales	Moraceae	Ficus lyrata	Warb.	8	Not assessed	0	0	0	0	0	0	0	0	0	0	0	0	0	0	0	0	0	0	0	0	0	0	0	0	0	0	0	0	0	0	0	0	0	0	0	0	0	0	0	1	0	0	0	0
Rosales	Moraceae	Ficus macrophylla	Desf. ex Pers.	21	Not assessed	1	0	0	0	1	0	0	0	0	0	0	0	0	0	0	0	0	0	0	0	0	0	0	0	0	0	0	0	0	0	0	0	0	0	0	0	0	0	0	1	0	0	0	0
Rosales	Moraceae	Ficus microcarpa	L.f.	7	Not assessed	0	1	1	1	1	0	0	0	0	0	0	0	0	0	0	0	0	0	0	0	0	0	0	0	0	0	0	0	0	0	0	0	0	0	0	0	0	0	0	1	0	0	0	0
Rosales	Moraceae	Ficus natalensis	Hochst.	22	Not assessed	0	0	0	0	1	0	0	0	0	0	0	0	0	0	0	0	0	0	0	1	1	1	0	0	0	0	0	0	0	0	0	0	0	0	0	0	0	0	0	0	0	0	0	0
Rosales	Moraceae	Ficus natalensis subsp. leprieurii	(Miq.) C.C.Berg	1	Not assessed	0	0	0	0	0	0	0	0	0	0	0	0	0	0	0	0	0	0	0	1	1	0	0	0	0	0	0	0	0	0	0	0	0	0	0	0	0	0	0	0	0	0	0	0
Rosales	Moraceae	Ficus nigropunctata	Mildbr. & Burret	1	Not assessed	0	0	0	0	0	0	0	0	0	0	0	0	0	0	0	0	0	0	0	0	1	1	0	0	0	0	0	0	0	0	0	0	0	0	0	0	0	0	0	0	0	0	0	0
Rosales	Moraceae	Ficus polita	Vahl	5	Not assessed	0	0	0	0	0	0	0	0	0	0	0	0	0	0	0	0	0	1	0	1	1	1	1	0	0	0	0	0	0	0	0	0	0	0	0	0	0	0	0	0	0	0	0	0
Rosales	Moraceae	Ficus pumila	L.	3	Not assessed	0	0	0	0	0	0	0	0	0	0	0	0	0	0	0	0	0	0	0	0	0	0	0	0	0	0	0	0	0	0	0	0	0	0	0	0	0	0	0	1	0	0	0	0
Rosales	Moraceae	Ficus religiosa	L.	8	Not assessed	0	0	1	0	0	0	0	0	0	0	0	0	0	0	0	0	0	0	0	0	0	0	0	0	1	1	0	0	0	0	0	0	0	0	0	0	0	0	0	0	0	0	0	0
Rosales	Moraceae	Ficus rubiginosa	Desf. ex Vent.	3	Not assessed	0	0	0	1	0	0	0	0	0	0	0	0	0	0	0	0	0	0	0	0	0	0	0	0	0	0	0	0	0	0	0	0	0	0	0	0	0	0	0	1	0	0	0	0
Rosales	Moraceae	Ficus rumphii	Blume	1	Not assessed	0	0	0	0	0	0	0	0	0	1	0	0	0	0	0	0	0	0	0	0	0	0	0	0	0	1	0	0	0	0	0	0	0	0	0	0	0	0	0	0	0	0	0	0
Rosales	Moraceae	Ficus salicifolia	Vahl	4	Not assessed	0	0	0	0	0	0	0	0	0	0	0	0	0	0	0	0	1	1	1	1	1	1	0	0	0	0	0	0	0	0	0	0	0	0	0	0	0	0	0	0	0	0	0	0
Rosales	Moraceae	Ficus sansibarica	Warb.	3	Not assessed	0	0	0	0	0	0	0	0	0	0	0	0	0	0	0	0	0	1	0	1	1	1	0	0	0	0	0	0	0	0	0	0	0	0	0	0	0	0	0	0	0	0	0	0
Rosales	Moraceae	Ficus stuhlmannii	Warb.	3	Not assessed	0	0	0	0	0	0	0	0	0	0	0	0	0	0	0	0	0	0	0	0	1	1	0	0	0	0	0	0	0	0	0	0	0	0	0	0	0	0	0	0	0	0	0	0
Rosales	Moraceae	Ficus sur	Forssk.	26	Not assessed	0	0	0	0	1	0	0	0	0	0	0	0	0	0	0	0	0	0	0	1	1	1	0	0	0	0	0	0	0	0	0	0	0	0	0	0	0	0	0	0	0	0	0	0
Rosales	Moraceae	Ficus sycomorus	L.	10	Not assessed	0	0	0	0	0	0	0	0	0	0	0	1	0	0	0	0	0	1	0	1	1	1	1	0	0	0	0	0	0	0	0	0	0	0	0	0	0	0	0	0	0	0	0	0
Rosales	Moraceae	Ficus tettensis	Hutch.	1	Least concern	0	0	0	0	0	0	0	0	0	0	0	0	0	0	0	0	0	1	1	1	1	1	0	0	0	0	0	0	0	0	0	0	0	0	0	0	0	0	0	0	0	0	0	0
Rosales	Moraceae	Ficus thonninghi	Blume	1	Not assessed	0	0	0	0	0	0	0	0	0	0	0	0	0	0	0	0	0	0	1	1	1	1	0	0	0	0	0	0	0	0	0	0	0	0	0	0	0	0	0	0	0	0	0	0
Rosales	Moraceae	Ficus thonningii	Blume	5	Not assessed	0	0	0	0	0	0	0	0	0	0	0	0	0	0	0	0	0	0	1	1	1	1	0	0	0	0	0	0	0	0	0	0	0	0	0	0	0	0	0	0	0	0	0	0
Rosales	Moraceae	Ficus tremula	Warb.	3	Least concern	0	0	0	0	0	0	0	0	0	0	0	0	0	0	0	0	0	0	0	1	1	1	0	0	0	0	0	0	0	0	0	0	0	0	0	0	0	0	0	0	0	0	0	0
Rosales	Moraceae	Ficus trichopoda	Baker	3	Not assessed	0	0	0	0	0	0	0	0	0	0	0	0	0	0	0	0	0	0	0	1	1	1	0	0	0	0	0	0	0	0	0	0	0	0	0	0	0	0	0	0	0	0	0	0
Rosales	Moraceae	Ficus verruculosa	Warb.	1	Least concern	0	0	0	0	0	0	0	0	0	0	0	0	0	0	0	0	0	1	0	1	1	1	0	0	0	0	0	0	0	0	0	0	0	0	0	0	0	0	0	0	0	0	0	0
Rosales	Moraceae	Ficus virens var. sublanceolata	(Miq.) Corner	1	Not assessed	0	0	0	0	0	0	0	0	0	0	0	0	0	0	0	0	0	0	0	0	0	0	0	0	0	0	0	0	0	0	0	0	0	0	0	0	0	0	0	1	0	0	0	0
Sapindales	Sapindaceae	Filicium decipiens	(Wight & Arn.) Thwaites	1	Least concern	0	0	0	0	0	0	0	0	0	0	0	0	0	0	0	0	0	0	1	0	1	0	1	0	1	0	0	0	0	0	0	0	0	0	0	0	0	0	0	0	0	0	0	0
Malvales	Malvaceae	Firmiana simplex	(L.) W.Wight	4	Not assessed	0	0	0	0	1	0	0	0	0	1	0	0	0	0	0	0	0	0	0	0	0	0	0	0	0	0	0	0	0	0	0	0	0	0	0	0	0	0	0	0	0	0	0	0
Malpighiales	Salicaceae	Flacourtia indica	(Burm.f.) Merr.	1	Least concern	0	0	1	1	0	0	0	0	0	1	0	0	0	0	0	0	0	0	0	1	1	1	1	0	1	1	1	0	0	0	0	0	0	0	0	0	0	0	0	1	0	0	0	0
Sapindales	Rutaceae	Flindersia brayleyana	F.Muell.	4	Least concern	0	0	0	0	0	0	0	0	0	0	0	0	0	0	0	0	0	0	0	0	0	0	0	0	0	0	0	0	0	0	0	0	0	0	0	0	0	0	0	1	0	0	0	0
Sapindales	Rutaceae	Flindersia xanthoxyla	(A.Cunn. ex Hook.) Domin	1	Least concern	0	0	0	0	0	0	0	0	0	0	0	0	0	0	0	0	0	0	0	0	0	0	0	0	0	0	0	0	0	0	0	0	0	0	0	0	0	0	0	1	0	0	0	0
Asparagales	Asparagaceae	Flueggea virosa	(Roxb. ex Willd.) Royle	4	Least concern	0	0	1	0	0	0	0	0	0	0	0	0	0	0	0	0	0	1	1	1	1	1	0	0	0	0	0	0	0	0	0	0	0	0	0	0	0	0	0	0	0	0	0	0
Gentianales	Apocynaceae	Fockea edulis	(Thunb.) K.Schum.	1	Not assessed	0	0	0	0	0	0	0	0	0	0	0	0	0	0	0	0	0	0	0	0	0	1	0	0	0	0	0	0	0	0	0	0	0	0	0	0	0	0	1	0	0	0	0	0
Gentianales	Apocynaceae	Fockea multiflora	K.Schum.	1	Not assessed	0	0	0	0	0	0	0	0	0	0	0	0	0	0	0	0	0	0	0	1	1	0	0	0	0	0	0	0	0	0	0	0	0	0	0	0	0	0	0	0	0	0	0	0
Lamiales	Oleaceae	Forsythia x intermedia	Zabel	1	Not assessed	0	0	0	0	0	0	0	0	0	0	0	0	0	0	0	0	0	0	0	0	0	0	0	0	0	0	0	0	0	0	0	0	0	0	0	0	0	0	0	0	0	0	0	0
Ericales	Fouquieriaceae	Fouquieria diguetii	I.M.Johnst.	1	Vulnerable	0	0	0	0	0	0	0	0	0	0	0	0	0	0	0	1	0	0	0	0	0	0	0	0	0	0	0	0	0	0	0	0	0	0	0	0	0	0	0	0	0	0	0	0
Ericales	Fouquieriaceae	Fouquieria fasciculata	(Willd. ex Roem. & Schult.) Nash	1	Vulnerable	0	0	0	0	0	0	0	0	0	0	0	0	0	0	0	0	0	0	0	0	0	0	0	0	0	0	0	0	0	0	0	1	0	0	0	0	0	0	0	0	0	0	0	0
Ericales	Fouquieriaceae	Fouquieria splendens	Engelm.	1	Not assessed	0	0	0	0	0	0	0	0	0	0	0	0	0	0	0	1	0	0	0	0	0	0	0	0	0	0	0	0	0	0	0	0	0	0	0	0	0	0	0	0	0	0	0	0
Lamiales	Oleaceae	Fraxinus americana	L.	4	Critically endangered	1	0	1	0	1	0	0	0	0	0	0	0	0	1	1	0	0	0	0	0	0	0	0	0	0	0	0	0	0	0	0	0	0	0	0	0	0	0	0	0	0	0	0	0
Lamiales	Oleaceae	Fraxinus angustifolia	Vahl	6	Least concern	1	0	1	0	0	0	0	0	0	0	1	1	0	0	0	0	0	0	0	0	0	0	0	0	0	0	0	0	0	0	0	0	0	0	0	0	0	0	0	0	0	0	0	0
Lamiales	Oleaceae	Fraxinus excelsior	L.	3	Near threatened	0	0	0	0	1	0	0	1	0	0	1	1	0	0	0	0	0	0	0	0	0	0	0	0	0	0	0	0	0	0	0	0	0	0	0	0	0	0	0	0	0	0	0	0
Lamiales	Oleaceae	Fraxinus ornus	L.	2	Least concern	0	0	1	0	0	0	0	0	0	0	0	1	0	0	0	0	0	0	0	0	0	0	0	0	0	0	0	0	0	0	0	0	0	0	0	0	0	0	0	0	0	0	0	0
Lamiales	Oleaceae	Fraxinus pennsylvanica	L.	2	Critically endangered	1	0	1	0	0	0	0	0	0	0	0	0	0	1	1	0	0	0	0	0	0	0	0	0	0	0	0	0	0	0	0	0	0	0	0	0	0	0	0	0	0	0	0	0
Lamiales	Oleaceae	Fraxinus uhdei	(Wenz.) Lingelsh.	1	Least concern	0	1	1	0	1	0	0	0	0	0	0	0	0	0	0	0	0	0	0	0	0	0	0	0	0	0	0	0	0	0	0	1	0	0	0	0	0	0	0	0	0	0	0	0
Lamiales	Oleaceae	Fraxinus velutina	Torr.	3	Not assessed	0	0	0	0	1	0	0	0	0	0	0	0	0	0	0	1	0	0	0	0	0	0	0	0	0	0	0	0	0	0	0	0	0	0	0	0	0	0	0	0	0	0	0	0
Lamiales	Scrophulariaceae	Freylina lanceolata	(L.f.) G.Don	1	Not assessed	0	0	0	0	0	0	0	0	0	0	0	0	0	0	0	0	0	0	0	0	0	1	0	0	0	0	0	0	0	0	0	0	0	0	0	0	0	0	1	0	0	0	0	0
Lamiales	Scrophulariaceae	Freylinia crispa	Van Jaarsv.	1	Not assessed	0	0	0	0	0	0	0	0	0	0	0	0	0	0	0	0	0	0	0	0	0	0	0	0	0	0	0	0	0	0	0	0	0	0	0	0	0	0	1	0	0	0	0	0
Lamiales	Scrophulariaceae	Freylinia densiflora	Benth.	1	Not assessed	0	0	0	0	0	0	0	0	0	0	0	0	0	0	0	0	0	0	0	0	0	0	0	0	0	0	0	0	0	0	0	0	0	0	0	0	0	0	1	0	0	0	0	0
Lamiales	Scrophulariaceae	Freylinia lanceolata	(L.f.) G.Don	6	Not assessed	0	0	0	0	0	0	0	0	0	0	0	0	0	0	0	0	0	0	0	0	0	1	0	0	0	0	0	0	0	0	0	0	0	0	0	0	0	0	1	0	0	0	0	0
Lamiales	Scrophulariaceae	Freylinia tropica	S.Moore	5	Not assessed	0	0	0	0	0	0	0	0	0	0	0	0	0	0	0	0	0	0	0	0	1	1	0	0	0	0	0	0	0	0	0	0	0	0	0	0	0	0	0	0	0	0	0	0
Lamiales	Scrophulariaceae	Freylinia undulata	(L.f.) Benth.	2	Not assessed	0	0	0	0	0	0	0	0	0	0	0	0	0	0	0	0	0	0	0	0	0	1	0	0	0	0	0	0	0	0	0	0	0	0	0	0	0	0	1	0	0	0	0	0
Lamiales	Scrophulariaceae	Freylinia visseri	Van Jaarsv.	1	Not assessed	0	0	0	0	0	0	0	0	0	0	0	0	0	0	0	0	0	0	0	0	0	0	0	0	0	0	0	0	0	0	0	0	0	0	0	0	0	0	1	0	0	0	0	0
Myrtales	Onagraceae	Fuchsia boliviana	Britton	1	Not assessed	0	0	1	1	0	0	0	0	0	0	0	0	0	0	0	0	0	0	0	0	0	0	0	0	0	0	0	0	0	0	0	0	0	0	0	1	1	0	0	0	0	0	0	0
Myrtales	Onagraceae	Fuchsia fulgens	DC.	1	Not assessed	0	0	0	0	0	0	0	0	0	0	0	0	0	0	0	0	0	0	0	0	0	0	0	0	0	0	0	0	0	0	0	1	0	0	0	0	0	0	0	0	0	0	0	0
Gentianales	Apocynaceae	Funtumia africana	(Benth.) Stapf	1	Least concern	0	0	0	0	0	0	0	0	0	0	0	0	0	0	0	0	0	0	0	0	0	0	0	0	0	0	0	0	0	0	0	0	0	0	0	0	0	0	0	0	0	0	0	0
Malpighiales	Malpighiaceae	Galphimia glauca	Cav.	1	Not assessed	0	0	0	0	0	0	0	0	0	0	0	0	0	0	0	0	0	0	0	0	0	0	0	0	0	0	0	0	0	0	0	1	0	0	0	0	0	0	0	0	0	0	0	0
Myrtales	Lythraceae	Galpinia transvaalica	N.E.Br.	10	Least concern	0	0	0	0	0	0	0	0	0	0	0	0	0	0	0	0	0	0	0	0	0	1	0	0	0	0	0	0	0	0	0	0	0	0	0	0	0	0	0	0	0	0	0	0
Malpighiales	Clusiaceae	Garcinia gerrardii	Harv. ex Sim	4	Not assessed	0	0	0	0	0	0	0	0	0	0	0	0	0	0	0	0	0	0	0	0	0	1	0	0	0	0	0	0	0	0	0	0	0	0	0	0	0	0	0	0	0	0	0	0
Malpighiales	Clusiaceae	Garcinia livingstonei	T.Anders	5	Not assessed	0	0	0	0	0	0	0	0	0	0	0	0	0	0	0	0	0	1	1	1	1	1	0	0	0	0	0	0	0	0	0	0	0	0	0	0	0	0	0	0	0	0	0	0
Malpighiales	Clusiaceae	Garcinia mangostana	L.	1	Not assessed	0	0	0	0	0	0	0	0	0	0	0	0	0	0	0	0	0	0	0	0	0	0	0	0	0	1	0	0	0	0	0	0	0	0	0	0	0	0	0	0	0	0	0	0
Malpighiales	Clusiaceae	Garcinia xanthochymus	Hook.f. ex T.Anderson	1	Not assessed	0	0	0	0	0	0	0	0	0	0	0	0	0	0	0	0	0	0	0	0	0	0	0	0	1	1	0	0	0	0	0	0	0	0	0	0	0	0	0	0	0	0	0	0
Gentianales	Rubiaceae	Gardenia cornuta	Hemsl.	2	Not assessed	0	0	0	0	0	0	0	0	0	0	0	0	0	0	0	0	0	0	0	0	0	1	0	0	0	0	0	0	0	0	0	0	0	0	0	0	0	0	0	0	0	0	0	0
Gentianales	Rubiaceae	Gardenia globosa	Hemsl.	2	Least concern	0	0	0	0	0	0	0	0	0	0	0	0	0	0	0	0	0	0	0	0	0	1	0	0	0	0	0	0	0	0	0	0	0	0	0	0	0	0	0	0	0	0	0	0
Gentianales	Rubiaceae	Gardenia jasminoides	Ellis	3	Not assessed	0	0	0	0	0	0	0	0	0	1	0	0	0	0	0	0	0	0	0	0	0	0	0	0	1	1	0	0	0	0	0	0	0	0	0	0	0	0	0	0	0	0	0	0
Gentianales	Rubiaceae	Gardenia resiniflua	Hiern	1	Not assessed	0	0	0	0	0	0	0	0	0	0	0	0	0	0	0	0	0	0	0	1	1	1	0	0	0	0	0	0	0	0	0	0	0	0	0	0	0	0	0	0	0	0	0	0
Gentianales	Rubiaceae	Gardenia ternifolia subsp. jovis-tonantis	(Welw.) Verdc.	3	Least concern	0	0	0	0	0	0	0	0	0	0	0	0	0	0	0	0	0	0	0	1	1	0	0	0	0	0	0	0	0	0	0	0	0	0	0	0	0	0	0	0	0	0	0	0
Gentianales	Rubiaceae	Gardenia ternifolia subsp. jovis-tonantis var. goetzei	(Stapf & Hutch.) Verdc.	1	Not assessed	0	0	0	0	0	0	0	0	0	0	0	0	0	0	0	0	0	0	0	0	0	1	0	0	0	0	0	0	0	0	0	0	0	0	0	0	0	0	0	0	0	0	0	0
Gentianales	Rubiaceae	Gardenia thunbergia	Thunb.	18	Not assessed	0	0	0	0	0	0	0	0	0	0	0	0	0	0	0	0	0	0	0	0	0	1	0	0	0	0	0	0	0	0	0	0	0	0	0	0	0	0	0	0	0	0	0	0
Gentianales	Rubiaceae	Gardenia volkensii	K.Schum.	8	Least concern	0	0	0	0	0	0	0	0	0	0	0	0	0	0	0	0	0	0	0	0	0	1	0	0	0	0	0	0	0	0	0	0	0	0	0	0	0	0	0	0	0	0	0	0
Gentianales	Rubiaceae	Gardenia volkensii subsp. spatulifolia	(Stapf. & Hutch.) Verdc.	3	Least concern	0	0	0	0	0	0	0	0	0	0	0	0	0	0	0	0	0	0	0	0	1	1	0	0	0	0	0	0	0	0	0	0	0	0	0	0	0	0	0	0	0	0	0	0
Arecales	Arecaceae	Gastrococcos crispa	(Kunth) H.E.Moore	1	Not assessed	0	0	0	0	0	0	0	0	0	0	0	0	0	0	0	0	0	0	0	0	0	0	0	0	0	0	0	0	0	0	0	1	0	0	0	0	0	0	0	0	0	0	0	0
Arecales	Arecaceae	Gaussia attenuata	(O.F. Cooke) Becc.	1	Vulnerable	0	0	0	0	0	0	0	0	0	0	0	0	0	0	0	0	0	0	0	0	0	0	0	0	0	0	0	0	0	0	0	1	0	0	0	0	0	0	0	0	0	0	0	0
Arecales	Arecaceae	Gaussia maya	(O.F.Cook) H.J.Quero & Read	1	Vulnerable	0	0	0	0	0	0	0	0	0	0	0	0	0	0	0	0	0	0	0	0	0	0	0	0	0	0	0	0	0	0	0	1	0	0	0	0	0	0	0	0	0	0	0	0
Gentianales	Loganiaceae	Gelsemium sempervirens	(L.) J. St.-Hil.	2	Not assessed	0	0	0	0	0	0	0	0	0	0	0	0	0	0	0	0	0	0	0	0	0	0	0	0	0	0	0	0	0	0	0	1	0	0	0	0	0	0	0	0	0	0	0	0
Huertales	Gerrardinaceae	Gerrardina foliosa	Oliv.	1	Least concern	0	0	0	0	0	0	0	0	0	0	0	0	0	0	0	0	0	0	0	0	0	1	0	0	0	0	0	0	0	0	0	0	0	0	0	0	0	0	0	0	0	0	0	0
Proteales	Proteaceae	Gevuina avellana	Molina	1	Least concern	0	0	0	0	0	0	0	0	0	0	0	0	0	0	0	0	0	0	0	0	0	0	0	0	0	0	0	0	0	0	0	0	0	0	0	1	0	0	0	0	0	0	0	0
Ginkgoales	Ginkgoaceae	Ginkgo biloba	L.	23	Endangered	0	0	0	0	0	0	0	0	0	1	0	0	0	0	0	0	0	0	0	0	0	0	0	0	0	0	0	0	0	0	0	0	0	0	0	0	0	0	0	0	0	0	0	0
Fabales	Fabaceae	Gleditsia japonica	Miq.	1	Least concern	0	0	0	0	0	0	0	0	0	1	0	0	0	0	0	0	0	0	0	0	0	0	0	0	0	0	0	0	0	0	0	0	0	0	0	0	0	0	0	0	0	0	0	0
Fabales	Fabaceae	Gleditsia japonica var. stenocarpa	Nakai	1	Not assessed	0	0	0	0	0	0	0	0	0	1	0	0	0	0	0	0	0	0	0	0	0	0	0	0	0	0	0	0	0	0	0	0	0	0	0	0	0	0	0	0	0	0	0	0
Fabales	Fabaceae	Gleditsia triacanthos	L.	6	Least concern	1	1	1	0	1	1	0	0	0	0	0	0	0	1	1	0	0	0	0	0	0	0	0	0	0	0	0	0	0	0	0	0	0	0	0	0	0	0	0	0	0	0	0	0
Fabales	Fabaceae	Gliricidia sepium	(Jacq.) Kunth	2	Least concern	0	0	1	0	0	0	0	0	0	0	0	0	0	0	0	0	0	0	0	0	0	0	0	0	0	0	0	0	0	0	0	1	0	0	0	0	0	0	0	0	0	0	0	0
Lamiales	Lamiaceae	Gmelina arborea	Roxb. ex Sm.	3	Least concern	1	0	0	0	0	0	0	0	0	0	0	0	0	0	0	0	0	0	0	0	0	0	0	0	1	1	0	0	0	0	0	0	0	0	0	0	0	0	0	0	0	0	0	0
Lamiales	Lamiaceae	Gmelina leichardtii	(F.Muell.) Benth.	1	Not assessed	0	0	0	0	0	0	0	0	0	0	0	0	0	0	0	0	0	0	0	0	0	0	0	0	0	0	0	0	0	0	0	0	0	0	0	0	0	0	0	1	0	0	0	0
Gnetales	Gnetaceae	Gnetum gnemon	L.	2	Least concern	0	0	0	0	0	0	0	0	0	1	0	0	0	0	0	0	0	0	0	0	0	0	0	0	1	1	0	0	0	0	0	0	0	0	0	0	0	0	0	0	0	0	0	0
Gentianales	Apocynaceae	Gonioma kamassi	E.Mey.	8	Least concern	0	0	0	0	0	0	0	0	0	0	0	0	0	0	0	0	0	0	0	0	0	1	0	0	0	0	0	0	0	0	0	0	0	0	0	0	0	0	0	0	0	0	0	0
Malvales	Malvaceae	Gossypium herbaceum	L.	1	Data deficient	0	0	0	0	0	0	0	0	0	1	0	0	0	0	0	0	0	0	0	0	0	0	0	0	0	1	0	0	0	0	0	0	0	0	0	0	0	0	0	0	0	0	0	0
Proteales	Proteaceae	Grevillea banksii	R.Br.	2	Not assessed	1	0	1	0	0	0	0	0	0	0	0	0	0	0	0	0	0	0	0	0	0	0	0	0	0	0	0	0	0	0	0	0	0	0	0	0	0	0	0	1	0	0	0	0
Proteales	Proteaceae	Grevillea hookeriana	Meisn.	1	Least concern	0	0	0	0	0	0	0	0	0	0	0	0	0	0	0	0	0	0	0	0	0	0	0	0	0	0	0	0	0	0	0	0	0	0	0	0	0	0	0	0	1	0	0	0
Proteales	Proteaceae	Grevillea humilis	Makinson	1	Not assessed	0	0	0	0	0	0	0	0	0	0	0	0	0	0	0	0	0	0	0	0	0	0	0	0	0	0	0	0	0	0	0	0	0	0	0	0	0	0	0	1	0	0	0	0
Proteales	Proteaceae	Grevillea juniperina subsp. sulphurea	(A.Cunn.) Makinson	1	Not assessed	0	0	0	0	0	0	0	0	0	0	0	0	0	0	0	0	0	0	0	0	0	0	0	0	0	0	0	0	0	0	0	0	0	0	0	0	0	0	0	1	0	0	0	0
Proteales	Proteaceae	Grevillea lanigera cv. 'Mt Tamboritha'	A.Cunn. ex Meisn.	1	NA	0	0	0	0	0	0	0	0	0	0	0	0	0	0	0	0	0	0	0	0	0	0	0	0	0	0	0	0	0	0	0	0	0	0	0	0	0	0	0	0	0	0	0	0
Proteales	Proteaceae	Grevillea pteridifolia	Knight	1	Not assessed	0	0	0	0	0	0	0	0	0	0	0	0	0	0	0	0	0	0	0	0	0	0	0	0	0	0	0	0	0	0	0	0	0	0	0	0	0	0	0	1	0	0	0	0
Proteales	Proteaceae	Grevillea robusta	A.Cunn.	22	Not assessed	1	0	1	1	0	0	0	0	0	0	0	0	0	0	0	0	0	0	0	0	0	0	0	0	0	0	0	0	0	0	0	0	0	0	0	0	0	0	0	1	0	0	0	0
Proteales	Proteaceae	Grevillea rosmariniifolia	A.Cunn.	1	Least concern	1	0	0	0	0	0	0	0	0	0	0	0	0	0	0	0	0	0	0	0	0	0	0	0	0	0	0	0	0	0	0	0	0	0	0	0	0	0	0	1	0	0	0	0
Proteales	Proteaceae	Grevillea rosmariniifolia cv. 'Jenkinsii'	A.Cunn.	1	NA	0	0	0	0	0	0	0	0	0	0	0	0	0	0	0	0	0	0	0	0	0	0	0	0	0	0	0	0	0	0	0	0	0	0	0	0	0	0	0	0	0	0	0	0
Proteales	Proteaceae	Grevillea thelemanniana	Hügel ex Lindl.	1	Not assessed	0	0	0	0	0	0	0	0	0	0	0	0	0	0	0	0	0	0	0	0	0	0	0	0	0	0	0	0	0	0	0	0	0	0	0	0	0	0	0	0	1	0	0	0
Malvales	Malvaceae	Grewia bicolor	Juss.	1	Not assessed	0	0	0	0	0	0	0	0	0	0	0	0	0	0	0	0	1	1	1	1	1	1	0	0	0	0	0	0	0	0	0	0	0	0	0	0	0	0	0	0	0	0	0	0
Malvales	Malvaceae	Grewia caffra	Meisn.	1	Not assessed	0	0	0	0	0	0	0	0	0	0	0	0	0	0	0	0	0	0	0	0	0	1	0	0	0	0	0	0	0	0	0	0	0	0	0	0	0	0	0	0	0	0	0	0
Malvales	Malvaceae	Grewia flava	DC.	3	Not assessed	0	0	0	0	0	0	0	0	0	0	0	0	0	0	0	0	0	0	0	0	0	1	0	0	0	0	0	0	0	0	0	0	0	0	0	0	0	0	0	0	0	0	0	0
Malvales	Malvaceae	Grewia flavescens	Juss.	2	Not assessed	0	0	0	0	0	0	0	0	0	0	0	0	0	0	0	0	1	1	0	1	1	1	0	0	1	0	0	0	0	0	0	0	0	0	0	0	0	0	0	0	0	0	0	0
Malvales	Malvaceae	Grewia hispida	Harv.	1	Not assessed	0	0	0	0	0	0	0	0	0	0	0	0	0	0	0	0	0	0	0	0	0	1	0	0	0	0	0	0	0	0	0	0	0	0	0	0	0	0	0	0	0	0	0	0
Malvales	Malvaceae	Grewia lasiocarpa	E.Mey ex Harv.	5	Not assessed	0	0	0	0	0	0	0	0	0	0	0	0	0	0	0	0	0	0	0	0	0	1	0	0	0	0	0	0	0	0	0	0	0	0	0	0	0	0	0	0	0	0	0	0
Malvales	Malvaceae	Grewia monticola	Sond.	3	Least concern	0	0	0	0	0	0	0	0	0	0	0	0	0	0	0	0	0	0	0	0	1	1	0	0	0	0	0	0	0	0	0	0	0	0	0	0	0	0	0	0	0	0	0	0
Malvales	Malvaceae	Grewia occidentalis	L.	14	Not assessed	0	0	0	0	1	0	0	0	0	0	0	0	0	0	0	0	0	0	0	0	0	1	0	0	0	0	0	0	0	0	0	0	0	0	0	0	0	0	0	0	0	0	0	0
Malvales	Malvaceae	Grewia sulcata	Mast.	1	Not assessed	0	0	0	0	0	0	0	0	0	0	0	0	0	0	0	0	0	0	0	0	1	1	0	0	0	0	0	0	0	0	0	0	0	0	0	0	0	0	0	0	0	0	0	0
Geraniales	Francoaceae	Greyia flanaganii	Bolus	6	Data deficient	0	0	0	0	0	0	0	0	0	0	0	0	0	0	0	0	0	0	0	0	0	1	0	0	0	0	0	0	0	0	0	0	0	0	0	0	0	0	0	0	0	0	0	0
Geraniales	Francoaceae	Greyia radlkoferi	Szyszyl.	5	Not assessed	0	0	0	0	0	0	0	0	0	0	0	0	0	0	0	0	0	0	0	0	0	1	0	0	0	0	0	0	0	0	0	0	0	0	0	0	0	0	0	0	0	0	0	0
Geraniales	Francoaceae	Greyia sutherlandii	Hook. & Harv.	5	Not assessed	0	0	0	0	0	0	0	0	0	0	0	0	0	0	0	0	0	0	0	0	0	1	0	0	0	0	0	0	0	0	0	0	0	0	0	0	0	0	0	0	0	0	0	0
Malvales	Sterculiaceae	Guazuma ulmifolia	Lam.	1	Not assessed	0	0	0	0	0	0	0	0	0	0	0	0	0	0	0	0	0	0	0	0	0	0	0	0	0	0	0	0	0	0	0	1	0	0	0	0	0	0	0	0	0	0	0	0
Fabales	Fabaceae	Guibourtia coleosperma	(Benth.) Leonard	1	Not assessed	0	0	0	0	0	0	0	0	0	0	0	0	0	0	0	0	0	0	0	1	1	1	0	0	0	0	0	0	0	0	0	0	0	0	0	0	0	0	0	0	0	0	0	0
Fabales	Fabaceae	Guibourtia conjugata	(Bolle) J. Léonard	1	Least concern	0	0	0	0	0	0	0	0	0	0	0	0	0	0	0	0	0	0	0	0	1	1	0	0	0	0	0	0	0	0	0	0	0	0	0	0	0	0	0	0	0	0	0	0
Celastrales	Celastraceae	Gymnosporia bachmannii	Loes.	3	Vulnerable	0	0	0	0	0	0	0	0	0	0	0	0	0	0	0	0	0	0	0	0	0	1	0	0	0	0	0	0	0	0	0	0	0	0	0	0	0	0	0	0	0	0	0	0
Celastrales	Celastraceae	Gymnosporia buxifolia	(L.) Szyszyl.	3	Not assessed	0	0	0	0	1	0	0	0	0	0	0	0	0	0	0	0	0	1	1	1	1	1	0	0	0	0	0	0	0	0	0	0	0	0	0	0	0	0	0	0	0	0	0	0
Celastrales	Celastraceae	Gymnosporia heterophylla	(Eckl. & Zeyh.) Loes.	1	Least concern	0	0	0	0	0	0	0	0	0	0	0	0	0	0	0	0	0	0	0	0	0	1	0	0	0	0	0	0	0	0	0	0	0	0	0	0	0	0	0	0	0	0	0	0
Celastrales	Celastraceae	Gymnosporia mossambicensis	(Klotzsch) Loes.	1	Least concern	0	0	0	0	0	0	0	0	0	0	0	0	0	0	0	0	0	0	0	0	1	1	0	0	0	0	0	0	0	0	0	0	0	0	0	0	0	0	0	0	0	0	0	0
Celastrales	Celastraceae	Gymnosporia nemorosa	(Eckl. & Zeyh.) Szyszyl.	1	Not assessed	0	0	0	0	0	0	0	0	0	0	0	0	0	0	0	0	0	0	0	0	0	1	0	0	0	0	0	0	0	0	0	0	0	0	0	0	0	0	0	0	0	0	0	0
Celastrales	Celastraceae	Gymnosporia senegalensis	(Lam.) Loes.	3	Least concern	0	0	0	0	0	0	0	0	0	0	0	0	0	0	0	0	0	1	1	1	1	1	0	0	0	0	0	0	0	0	0	0	0	0	0	0	0	0	0	0	0	0	0	0
Laurales	Hernandiaceae	Gyrocarpus americanus subsp. africanus	Kubitzki	1	Not assessed	0	0	0	0	0	0	0	0	0	0	0	0	0	0	0	0	0	0	1	0	1	1	0	0	0	0	0	0	0	0	0	0	0	0	0	0	0	0	0	0	0	0	0	0
Laurales	Hernandiaceae	Gyrocarpus americanus subsp. americanus	Jacq.	1	Least concern	0	0	0	0	0	0	0	0	0	0	0	0	0	0	0	0	0	0	1	0	1	0	0	0	1	0	0	0	0	0	0	0	0	0	0	0	0	0	0	1	0	0	0	0
Proteales	Proteaceae	Hakea salicifolia	(Vent.) B.L.Burtt	2	Not assessed	1	1	1	0	0	0	0	0	0	0	0	0	0	0	0	0	0	0	0	0	0	0	0	0	0	0	0	0	0	0	0	0	0	0	0	0	0	0	0	1	0	0	0	0
Ericales	Styracaceae	Halesia carolina	L.	2	Least concern	0	0	0	0	0	0	0	0	0	0	0	0	0	1	1	0	0	0	0	0	0	0	0	0	0	0	0	0	0	0	0	0	0	0	0	0	0	0	0	0	0	0	0	0
Lamiales	Scrophulariaceae	Halleria elliptica	Thunb.	2	Not assessed	0	0	0	0	0	0	0	0	0	0	0	0	0	0	0	0	0	0	0	0	0	0	0	0	0	0	0	0	0	0	0	0	0	0	0	0	0	0	1	0	0	0	0	0
Lamiales	Scrophulariaceae	Halleria lucida	L.	28	Least concern	0	0	0	0	1	0	0	0	0	0	0	0	0	0	0	0	0	0	0	0	1	1	0	0	0	0	0	0	0	0	0	0	0	0	0	0	0	0	0	0	0	0	0	0
Lamiales	Scrophulariaceae	Halleria ovata	Benth.	1	Not assessed	0	0	0	0	0	0	0	0	0	0	0	0	0	0	0	0	0	0	0	0	0	0	0	0	0	0	0	0	0	0	0	0	0	0	0	0	0	0	1	0	0	0	0	0
Saxifragales	Hamamelidaceae	Hamamelis mollis	Oliv. ex Forbes & Hemsl.	1	Least concern	0	0	0	0	0	0	0	0	0	1	0	0	0	0	0	0	0	0	0	0	0	0	0	0	0	0	0	0	0	0	0	0	0	0	0	0	0	0	0	0	0	0	0	0
Gentianales	Rubiaceae	Hamelia chrysantha	Sw.	2	Not assessed	0	0	0	0	0	0	0	0	0	0	0	0	0	0	0	0	0	0	0	0	0	0	0	0	0	0	0	0	0	0	0	1	0	0	0	0	0	0	0	0	0	0	0	0
Gentianales	Rubiaceae	Hamelia patens	Jacq.	1	Least concern	0	0	0	0	0	0	0	0	0	0	0	0	0	0	0	0	0	0	0	0	0	0	0	0	0	0	0	0	0	0	0	1	1	1	1	0	1	0	0	0	0	0	0	0
Lamiales	Bignoniaceae	Handroanthus chrysanthus	(Jacq.) S.O.Grose	1	Not assessed	0	0	0	0	0	0	0	0	0	0	0	0	0	0	0	0	0	0	0	0	0	0	0	0	0	0	0	0	0	0	0	1	1	0	0	0	0	0	0	0	0	0	0	0
Lamiales	Bignoniaceae	Handroanthus chrysotrichus	(Mart. ex A.DC.) Mattos	2	Not assessed	1	0	0	0	0	0	0	0	0	0	0	0	0	0	0	0	0	0	0	0	0	0	0	0	0	0	0	0	0	0	0	0	0	0	1	0	0	0	0	0	0	0	0	0
Lamiales	Bignoniaceae	Handroanthus heptaphyllus	(Vell.) Mattos	3	Least concern	0	0	0	0	0	0	0	0	0	0	0	0	0	0	0	0	0	0	0	0	0	0	0	0	0	0	0	0	0	0	0	0	0	0	1	0	1	0	0	0	0	0	0	0
Lamiales	Bignoniaceae	Handroanthus impetiginosus	(Mart. ex DC.) Mattos	2	Least concern	0	0	0	0	1	0	0	0	0	0	0	0	0	0	0	0	0	0	0	0	0	0	0	0	0	0	0	0	0	0	0	1	1	1	1	0	0	0	0	0	0	0	0	0
Lamiales	Bignoniaceae	Handroanthus ochraceus	(Cham.) Mattos	1	Not assessed	0	0	0	0	0	0	0	0	0	0	0	0	0	0	0	0	0	0	0	0	0	0	0	0	0	0	0	0	0	0	0	0	0	1	1	0	0	0	0	0	0	0	0	0
Lamiales	Bignoniaceae	Handroanthus umbellatus	(Sond.) Mattos	1	Not assessed	0	0	0	0	0	0	0	0	0	0	0	0	0	0	0	0	0	0	0	0	0	0	0	0	0	0	0	0	0	0	0	0	0	0	1	0	0	0	0	0	0	0	0	0
Lamiales	Bignoniaceae	Handroanthus vellosoi	(Toledo) Mattos	1	Not assessed	0	0	0	0	0	0	0	0	0	0	0	0	0	0	0	0	0	0	0	0	0	0	0	0	0	0	0	0	0	0	0	0	0	0	1	0	0	0	0	0	0	0	0	0
Sapindales	Anacardiaceae	Harpephyllum caffrum	Bernh. ex Krauss	31	Least concern	0	0	0	0	1	0	0	0	0	0	0	0	0	0	0	0	0	0	0	0	1	1	0	0	0	0	0	0	0	0	0	0	0	0	0	0	0	0	0	0	0	0	0	0
Sapindales	Sapindaceae	Harpullia pendula	Planch. ex F.Muell.	1	Not assessed	0	0	0	0	1	0	0	0	0	0	0	0	0	0	0	0	0	0	0	0	0	0	0	0	0	0	0	0	0	0	0	0	0	0	0	0	0	0	0	1	0	0	0	0
Malpighiales	Hypericaceae	Harungana madagascariensis	Lam. ex Poir.	1	Least concern	0	0	1	0	0	0	0	0	0	0	0	0	0	0	0	0	0	0	0	0	0	0	1	0	0	0	0	0	0	0	0	0	0	0	0	0	0	0	0	0	0	0	0	0
Sapindales	Anacardiaceae	Heeria argentea	Meisn.	2	Least concern	0	0	0	0	0	0	0	0	0	0	0	0	0	0	0	0	0	0	0	0	0	0	0	0	0	0	0	0	0	0	0	0	0	0	0	0	0	0	1	0	0	0	0	0
Apiales	Araliaceae	Heptapleurum actinophyllum	(Endl.) Lowry & G.M. Plunkett	11	Not assessed	1	1	1	1	0	0	0	0	0	0	0	0	0	0	0	0	0	0	0	0	0	0	0	0	0	0	0	0	0	0	0	0	0	0	0	0	0	0	0	1	0	0	0	0
Apiales	Araliaceae	Heptapleurum arboricola	Hayata	2	Not assessed	1	0	1	0	0	0	0	0	0	1	0	0	0	0	0	0	0	0	0	0	0	0	0	0	0	0	0	0	0	0	0	0	0	0	0	0	0	0	0	0	0	0	0	0
Apiales	Araliaceae	Heptapleurum calyptratum	(Hook.f. & Thomson) Y.F. Deng	1	Least concern	0	0	0	0	0	0	0	0	0	1	0	0	0	0	0	0	0	0	0	0	0	0	0	0	0	1	0	0	0	0	0	0	0	0	0	0	0	0	0	0	0	0	0	0
Malvales	Sterculiaceae	Heritiera macrophylla	Wall. ex Kurz	1	Not assessed	0	0	0	0	0	0	0	0	0	0	0	0	0	0	0	0	0	0	0	0	0	0	0	0	0	1	0	0	0	0	0	0	0	0	0	0	0	0	0	0	0	0	0	0
Laurales	Hernandiaceae	Hernandia nymphaeifolia	(C.Presl) Kubitzki	1	Not assessed	0	0	0	0	0	0	0	0	0	1	0	0	0	0	0	0	0	0	0	0	0	0	0	0	0	1	1	0	0	0	0	0	0	0	0	0	0	0	0	0	0	0	0	0
Laurales	Hernandiaceae	Hernandia ovigera	L.	1	Not assessed	0	0	0	0	0	0	0	0	0	0	0	0	0	0	0	0	0	0	0	0	0	0	0	0	0	1	1	0	0	0	0	0	0	0	0	0	0	0	0	0	0	0	0	0
Apiales	Apiaceae	Heteromorpha arborescens	(Spreng.) Cham. & Schltdl.	10	Least concern	0	0	0	0	0	0	0	0	0	0	0	0	0	0	0	0	0	0	0	0	1	1	0	0	0	0	0	0	0	0	0	0	0	0	0	0	0	0	1	0	0	0	0	0
Apiales	Apiaceae	Heteromorpha arborescens var. abyssinica	(A.Rich.) H.Wolff	5	Not assessed	0	0	0	0	0	0	0	0	0	0	0	0	0	0	0	0	0	0	0	0	1	1	0	0	0	0	0	0	0	0	0	0	0	0	0	0	0	0	0	0	0	0	0	0
Apiales	Araliaceae	Heteropanax fragrans	(Roxb.) Seem.	1	Not assessed	0	0	0	0	0	0	0	0	0	1	0	0	0	0	0	0	0	0	0	0	0	0	0	0	1	1	0	0	0	0	0	0	0	0	0	0	0	0	0	0	0	0	0	0
Myrtales	Myrtaceae	Heteropyxis canescens	Oliv.	2	Not assessed	0	0	0	0	0	0	0	0	0	0	0	0	0	0	0	0	0	0	0	0	0	1	0	0	0	0	0	0	0	0	0	0	0	0	0	0	0	0	0	0	0	0	0	0
Myrtales	Myrtaceae	Heteropyxis dehniae	Suess.	1	Not assessed	0	0	0	0	0	0	0	0	0	0	0	0	0	0	0	0	0	0	0	0	1	1	0	0	0	0	0	0	0	0	0	0	0	0	0	0	0	0	0	0	0	0	0	0
Myrtales	Myrtaceae	Heteropyxis natalensis	Harv.	19	Least concern	0	0	0	0	0	0	0	0	0	0	0	0	0	0	0	0	0	0	0	0	0	1	0	0	0	0	0	0	0	0	0	0	0	0	0	0	0	0	0	0	0	0	0	0
Malpighiales	Euphorbiaceae	Hevea brasiliensis	(Willd. ex A.Juss.) Muell.Arg.	1	Least concern	0	0	1	0	0	0	0	0	0	0	0	0	0	0	0	0	0	0	0	0	0	0	0	0	0	0	0	0	0	0	0	0	0	1	1	0	0	0	0	0	0	0	0	0
Magnoliales	Annonaceae	Hexalobus monopetalus var. monopetalus	(A.Rich.) Engl. &Diels	1	Least concern	0	0	0	0	0	0	0	0	0	0	0	0	0	0	0	0	0	0	0	1	1	1	0	0	0	0	0	0	0	0	0	0	0	0	0	0	0	0	0	0	0	0	0	0
Malpighiales	Phyllanthaceae	Heywoodia lucens	Sim	5	Not assessed	0	0	0	0	0	0	0	0	0	0	0	0	0	0	0	0	0	0	0	0	1	1	0	0	0	0	0	0	0	0	0	0	0	0	0	0	0	0	0	0	0	0	0	0
Malvales	Malvaceae	Hibiscus boryanus	DC.	1	Not assessed	0	0	0	0	0	0	0	0	0	0	0	0	0	0	0	0	0	0	0	0	0	0	1	0	0	0	0	0	0	0	0	0	0	0	0	0	0	0	0	0	0	0	0	0
Malvales	Malvaceae	Hibiscus diversifolius	Jacq.	1	Not assessed	0	0	0	0	0	0	0	0	0	0	0	0	0	0	0	0	0	0	1	1	1	1	0	0	0	0	1	0	0	0	0	0	0	0	0	0	0	0	0	1	0	0	1	0
Malvales	Malvaceae	Hibiscus greenwayi	Baker f.	1	Vulnerable	0	0	0	0	0	0	0	0	0	0	0	0	0	0	0	0	0	0	0	0	1	0	0	0	0	0	0	0	0	0	0	0	0	0	0	0	0	0	0	0	0	0	0	0
Malvales	Malvaceae	Hibiscus ludwigii	Eckl. & Zeyh.	1	Not assessed	0	0	0	0	0	0	0	0	0	0	0	0	0	0	0	0	0	0	0	0	0	1	0	0	0	0	0	0	0	0	0	0	0	0	0	0	0	0	0	0	0	0	0	0
Malvales	Malvaceae	Hibiscus pendunculatus	L.f.	1	Not assessed	0	0	0	0	0	0	0	0	0	0	0	0	0	0	0	0	0	0	0	0	0	1	0	0	0	0	0	0	0	0	0	0	0	0	0	0	0	0	1	0	0	0	0	0
Malvales	Malvaceae	Hibiscus rosa-sinensis	L.	8	Not assessed	0	0	0	0	1	0	0	0	0	1	0	0	0	0	0	0	0	0	0	0	0	0	0	0	0	0	0	0	0	0	0	0	0	0	0	0	0	0	0	0	0	0	0	0
Malvales	Malvaceae	Hibiscus schizopetalus	(Mast.) Hook.f.	1	Not assessed	0	0	0	0	0	0	0	0	0	0	0	0	0	0	0	0	0	0	0	0	1	0	0	0	0	0	0	0	0	0	0	0	0	0	0	0	0	0	0	0	0	0	0	0
Malvales	Malvaceae	Hibiscus syriacus	L.	6	Not assessed	0	0	0	0	0	0	0	0	0	1	0	0	0	0	0	0	0	0	0	0	0	0	0	0	0	0	0	0	0	0	0	0	0	0	0	0	0	0	0	0	0	0	0	0
Malvales	Malvaceae	Hibiscus tiliaceus	L.	4	Least concern	0	0	0	0	0	0	0	0	0	0	0	0	0	0	0	0	0	0	0	0	0	1	0	0	0	0	0	0	0	0	0	0	0	0	0	0	0	0	0	0	0	0	0	0
Sapindales	Sapindaceae	Hippobromus pauciflorus	Radkl.	3	Least concern	0	0	0	0	0	0	0	0	0	0	0	0	0	0	0	0	0	0	0	0	0	1	0	0	0	0	0	0	0	0	0	0	0	0	0	0	0	0	0	0	0	0	0	0
Lamiales	Verbenaceae	Holmskioldia sanguinea	Retz.	1	Not assessed	0	0	0	0	0	0	0	0	0	0	0	0	0	0	0	0	0	0	0	0	0	0	0	0	1	0	0	0	0	0	0	0	0	0	0	0	0	0	0	0	0	0	0	0
Malpighiales	Salicaceae	Homalium dentatum	Warb.	3	Not assessed	0	0	0	0	0	0	0	0	0	0	0	0	0	0	0	0	0	0	0	0	1	1	0	0	0	0	0	0	0	0	0	0	0	0	0	0	0	0	0	0	0	0	0	0
Caryophyllales	Polygonaceae	Homalocladium platycladum	(F.J.Müll.) L.H.Bailey	1	Not assessed	0	0	0	0	0	0	0	0	0	0	0	0	0	0	0	0	0	0	0	0	0	0	0	0	0	0	0	0	0	1	0	0	0	0	0	0	0	0	0	0	0	0	0	0
Rosales	Rhamnaceae	Hovenia dulcis	Thunb.	2	Least concern	0	0	1	0	0	0	0	0	0	1	0	0	0	0	0	0	0	0	0	0	0	0	0	0	0	0	0	0	0	0	0	0	0	0	0	0	0	0	0	0	0	0	0	0
Arecales	Arecaceae	Howea forsteriana	(C.Moore & F.Muell.) Becc.	5	Not assessed	0	0	0	0	0	0	0	0	0	0	0	0	0	0	0	0	0	0	0	0	0	0	0	0	0	0	0	0	1	0	0	0	0	0	0	0	0	0	0	0	0	0	0	0
Sapindales	Meliaceae	Humbertioturraea maculata	(Sm.) Cheek	1	Endangered	0	0	0	0	0	0	0	0	0	0	0	0	0	0	0	0	0	0	0	0	0	0	1	0	0	0	0	0	0	0	0	0	0	0	0	0	0	0	0	0	0	0	0	0
Rosales	Cannabaceae	Humulus lupulus	L.	1	Least concern	0	0	0	0	0	0	0	1	0	0	0	1	0	0	0	0	0	0	0	0	0	0	0	0	0	0	0	0	0	0	0	0	0	0	0	0	0	0	0	0	0	0	0	0
Malpighiales	Euphorbiaceae	Hura crepitans	L.	1	Not assessed	0	0	1	0	0	0	0	0	0	0	0	0	0	0	0	0	0	0	0	0	0	0	0	0	0	0	0	0	0	0	0	1	1	0	0	0	0	0	0	0	0	0	0	0
Malpighiales	Picrodendraceae	Hyaenanche globosa	(Gaertn.) Lamb	3	Not assessed	0	0	0	0	0	0	0	0	0	0	0	0	0	0	0	0	0	0	0	0	0	0	0	0	0	0	0	0	0	0	0	0	0	0	0	0	0	0	1	0	0	0	0	0
Malpighiales	Achariaceae	Hydnocarpus pentandrus	(Buch.-Ham.) Oken	1	Vulnerable	0	0	0	0	0	0	0	0	0	0	0	0	0	0	0	0	0	0	0	0	0	0	0	0	1	0	0	0	0	0	0	0	0	0	0	0	0	0	0	0	0	0	0	0
Gentianales	Rubiaceae	Hydnophytum formicarum	Jack	1	Not assessed	0	0	0	0	0	0	0	0	0	0	0	0	0	0	0	0	0	0	0	0	0	0	0	0	0	0	1	0	0	0	0	0	0	0	0	0	0	0	0	0	0	0	0	0
Gentianales	Rubiaceae	Hydnophytum puffii	Y.W.Low, Sugau & K.M.Wong	1	Not assessed	0	0	0	0	0	0	0	0	0	0	0	0	0	0	0	0	0	0	0	0	0	0	0	0	0	0	1	0	0	0	0	0	0	0	0	0	0	0	0	0	0	0	0	0
Cornales	Hydrangeaceae	Hydrangea macrophylla	(Thunb.) Ser.	3	Not assessed	0	0	0	0	0	0	0	0	0	1	0	0	0	0	0	0	0	0	0	0	0	0	0	0	0	0	0	0	0	0	0	0	0	0	0	0	0	0	0	0	0	0	0	0
Cornales	Hydrangeaceae	Hydrangea quercifolia	W. Bartram	1	Least concern	0	0	0	0	0	0	0	0	0	0	0	0	0	0	1	0	0	0	0	0	0	0	0	0	0	0	0	0	0	0	0	0	0	0	0	0	0	0	0	0	0	0	0	0
Fabales	Fabaceae	Hymenaea courbaril	L.	1	Least concern	0	0	0	0	0	0	0	0	0	0	0	0	0	0	0	0	0	0	0	0	0	0	0	0	0	0	0	0	0	0	0	1	1	1	1	0	0	0	0	0	0	0	0	0
Fabales	Fabaceae	Hymenaea verrucosa	Gaertn.	1	Not assessed	0	0	0	0	0	0	0	0	0	0	0	0	0	0	0	0	0	0	0	0	1	0	1	0	0	0	0	0	0	0	0	0	0	0	0	0	0	0	0	0	0	0	0	0
Malpighiales	Euphorbiaceae	Hymenocardia ulmoides	Oliv.	3	Least concern	0	0	0	0	0	0	0	0	0	0	0	0	0	0	0	0	0	1	0	1	1	1	0	0	0	0	0	0	0	0	0	0	0	0	0	0	0	0	0	0	0	0	0	0
Asterales	Asteraceae	Hymenolepis crithmifolia	(L.) Greuter, M.V.Agab. & Wagenitz	1	Not assessed	0	0	0	0	0	0	0	0	0	0	0	0	0	0	0	0	0	0	0	0	0	1	0	0	0	0	0	0	0	0	0	0	0	0	0	0	0	0	1	0	0	0	0	0
Apiales	Pittosporaceae	Hymenosporum flavum	(Hook.) F.Muell.	8	Not assessed	0	0	0	0	1	0	0	0	0	0	0	0	0	0	0	0	0	0	0	0	0	0	0	0	0	0	0	0	0	0	0	0	0	0	0	0	0	0	0	1	0	0	0	0
Arecales	Arecaceae	Hyophorbe lagenicaulis	(L.H. Bailey) H.E. Moore	3	Critically endangered	0	0	0	0	0	0	0	0	0	0	0	0	0	0	0	0	0	0	0	0	0	0	1	0	0	0	0	0	0	0	0	0	0	0	0	0	0	0	0	0	0	0	0	0
Arecales	Arecaceae	Hyophorbe verschaffeltii	H.Wendl.	3	Critically endangered	0	0	0	0	0	0	0	0	0	0	0	0	0	0	0	0	0	0	0	0	0	0	1	0	0	0	0	0	0	0	0	0	0	0	0	0	0	0	0	0	0	0	0	0
Gentianales	Rubiaceae	Hyperacanthus amoenus	(Sims) Bridson	4	Least concern	0	0	0	0	0	0	0	0	0	0	0	0	0	0	0	0	0	0	0	0	0	1	0	0	0	0	0	0	0	0	0	0	0	0	0	0	0	0	0	0	0	0	0	0
Gentianales	Rubiaceae	Hyperacanthus microphyllus	(K. Schum.) Bridson	1	Not assessed	0	0	0	0	0	0	0	0	0	0	0	0	0	0	0	0	0	0	0	0	0	1	0	0	0	0	0	0	0	0	0	0	0	0	0	0	0	0	0	0	0	0	0	0
Malpighiales	Hypericaceae	Hypericum perfoliatum	L.	1	Not assessed	0	0	0	0	0	0	0	1	0	0	0	1	0	0	0	0	0	0	0	0	0	0	0	0	0	0	0	0	0	0	0	0	0	0	0	0	0	0	0	0	0	0	0	0
Malpighiales	Hypericaceae	Hypericum revolutum	Vahl	5	Least concern	0	0	0	0	0	0	0	0	0	0	0	0	0	0	0	0	0	0	1	1	1	1	0	0	0	0	0	0	0	0	0	0	0	0	0	0	0	0	0	0	0	0	0	0
Malpighiales	Hypericaceae	Hypericum roeperianum	W.G.Schimper ex A.Rich.	2	Least concern	0	0	0	0	0	0	0	0	0	0	0	0	0	0	0	0	0	1	1	0	1	1	0	0	0	0	0	0	0	0	0	0	0	0	0	0	0	0	0	0	0	0	0	0
Arecales	Arecaceae	Hyphaena coriacea	Gaertn.	2	Least concern	0	0	0	0	0	0	0	0	0	0	0	0	0	0	0	0	0	0	1	0	1	1	1	0	0	0	0	0	0	0	0	0	0	0	0	0	0	0	0	0	0	0	0	0
Arecales	Arecaceae	Hyphaene petersiana	Klotzsch ex Mart.	1	Least concern	0	0	0	0	0	0	0	0	0	0	0	0	0	0	0	0	0	0	0	0	1	1	0	0	0	0	0	0	0	0	0	0	0	0	0	0	0	0	0	0	0	0	0	0
Fabales	Fabaceae	Hypocalyptus sophoroides	Druce	1	Least concern	0	0	0	0	0	0	0	0	0	0	0	0	0	0	0	0	0	0	0	0	0	0	0	0	0	0	0	0	0	0	0	0	0	0	0	0	0	0	1	0	0	0	0	0
Malpighiales	Salicaceae	Idesia polycarpa	Maxim.	1	Not assessed	0	0	0	0	0	0	0	0	0	1	0	0	0	0	0	0	0	0	0	0	0	0	0	0	0	0	0	0	0	0	0	0	0	0	0	0	0	0	0	0	0	0	0	0
Aquifoliales	Aquifoliaceae	Ilex aquifolium	L.	11	Least concern	0	1	1	0	0	0	0	1	0	0	0	1	0	0	0	0	0	0	0	0	0	0	0	0	0	0	0	0	0	0	0	0	0	0	0	0	0	0	0	0	0	0	0	0
Aquifoliales	Aquifoliaceae	Ilex aquifoluim cv. 'Golden queen'	L.	1	NA	0	0	0	0	0	0	0	0	0	0	0	0	0	0	0	0	0	0	0	0	0	0	0	0	0	0	0	0	0	0	0	0	0	0	0	0	0	0	0	0	0	0	0	0
Aquifoliales	Aquifoliaceae	Ilex cornuta	Lindl.	3	Least concern	0	0	0	0	1	1	0	0	0	1	0	0	0	0	0	0	0	0	0	0	0	0	0	0	0	0	0	0	0	0	0	0	0	0	0	0	0	0	0	0	0	0	0	0
Aquifoliales	Aquifoliaceae	Ilex latifolia	Murray	1	Least concern	0	0	0	0	1	0	0	0	0	1	0	0	0	0	0	0	0	0	0	0	0	0	0	0	0	0	0	0	0	0	0	0	0	0	0	0	0	0	0	0	0	0	0	0
Aquifoliales	Aquifoliaceae	Ilex mitis	(L.) Radlk.	13	Least concern	0	0	0	0	1	0	0	0	0	0	0	0	0	0	0	0	0	0	1	1	1	1	0	0	0	0	0	0	0	0	0	0	0	0	0	0	0	0	1	0	0	0	0	0
Aquifoliales	Aquifoliaceae	Ilex opaca	Aiton	1	Least concern	0	0	0	0	0	0	0	0	0	0	0	0	0	1	1	0	0	0	0	0	0	0	0	0	0	0	0	0	0	0	0	0	0	0	0	0	0	0	0	0	0	0	0	0
Aquifoliales	Aquifoliaceae	Ilex paraguariensis	A.St.-Hil.	1	Near threatened	0	0	0	0	0	0	0	0	0	0	0	0	0	0	0	0	0	0	0	0	0	0	0	0	0	0	0	0	0	0	0	0	0	0	1	0	1	0	0	0	0	0	0	0
Aquifoliales	Aquifoliaceae	Ilex rotunda	Thunb.	1	Least concern	0	0	0	0	0	0	0	0	0	1	0	0	0	0	0	0	0	0	0	0	0	0	0	0	0	0	0	0	0	0	0	0	0	0	0	0	0	0	0	0	0	0	0	0
Fabales	Fabaceae	Indigofera arrecta	Hochst. ex. A. Rich.	1	Not assessed	0	0	0	0	0	0	0	0	0	0	0	0	0	0	0	0	0	0	0	0	1	1	0	0	0	0	0	0	0	0	0	0	0	0	0	0	0	0	0	0	0	0	0	0
Fabales	Fabaceae	Indigofera filifolia	Thunb.	1	Least concern	0	0	0	0	0	0	0	0	0	0	0	0	0	0	0	0	0	0	0	0	0	0	0	0	0	0	0	0	0	0	0	0	0	0	0	0	0	0	1	0	0	0	0	0
Fabales	Fabaceae	Indigofera frutescens	L.f.	1	Not assessed	0	0	0	0	0	0	0	0	0	0	0	0	0	0	0	0	0	0	0	0	0	1	0	0	0	0	0	0	0	0	0	0	0	0	0	0	0	0	0	0	0	0	0	0
Fabales	Fabaceae	Indigofera hedyantha	Eckl. & Zeyh.	1	Not assessed	0	0	0	0	0	0	0	0	0	0	0	0	0	0	0	0	0	0	0	0	1	1	0	0	0	0	0	0	0	0	0	0	0	0	0	0	0	0	0	0	0	0	0	0
Fabales	Fabaceae	Indigofera jucunda	Schrire	4	Not assessed	0	0	0	0	0	0	0	0	0	0	0	0	0	0	0	0	0	0	0	0	0	1	0	0	0	0	0	0	0	0	0	0	0	0	0	0	0	0	0	0	0	0	0	0
Fabales	Fabaceae	Indigofera natalensis	Bolus	2	Not assessed	0	0	0	0	0	0	0	0	0	0	0	0	0	0	0	0	0	0	0	0	0	1	0	0	0	0	0	0	0	0	0	0	0	0	0	0	0	0	0	0	0	0	0	0
Fabales	Fabaceae	Indigofera tinctoria	Chapm.	1	Not assessed	0	0	0	0	0	0	0	0	0	0	0	0	0	0	0	0	0	0	0	1	1	1	1	0	0	1	1	0	0	0	0	0	0	0	0	0	0	0	0	1	0	0	0	0
Fabales	Fabaceae	Inga edulis	Mart.	1	Least concern	0	0	0	0	0	0	0	0	0	0	0	0	0	0	0	0	0	0	0	0	0	0	0	0	0	0	0	0	0	0	0	0	1	1	1	0	0	0	0	0	0	0	0	0
Ericales	Sapotaceae	Inhambanella henriquesii	(Engl.) Dubard	1	Not assessed	0	0	0	0	0	0	0	0	0	0	0	0	0	0	0	0	0	0	0	0	0	1	0	0	0	0	0	0	0	0	0	0	0	0	0	0	0	0	0	0	0	0	0	0
Solanales	Solanaceae	Iochroma cyaneum	(Lindl.) M.L. Green ex G.H.M. Lawr. & J.M. Tucker	1	Not assessed	0	0	0	0	0	0	0	0	0	0	0	0	0	0	0	0	0	0	0	0	0	0	0	0	0	0	0	0	0	0	0	0	0	1	0	1	0	0	0	0	0	0	0	0
Solanales	Solanaceae	Iochroma fuchsioides	(Bonpl.) Miers	1	Not assessed	0	0	0	0	0	0	0	0	0	0	0	0	0	0	0	0	0	0	0	0	0	0	0	0	0	0	0	0	0	0	0	0	0	1	1	0	0	0	0	0	0	0	0	0
Solanales	Solanaceae	Iochroma grandiflorum	Benth.	1	Not assessed	0	0	0	0	0	0	0	0	0	0	0	0	0	0	0	0	0	0	0	0	0	0	0	0	0	0	0	0	0	0	0	0	0	1	0	0	0	0	0	0	0	0	0	0
Solanales	Convolvulaceae	Ipomoea albivenia	(Lindl.) Sweet	1	Not assessed	0	0	0	0	0	0	0	0	0	0	0	0	0	0	0	0	0	0	0	0	1	1	0	0	0	0	0	0	0	0	0	0	0	0	0	0	0	0	0	0	0	0	0	0
Solanales	Convolvulaceae	Ipomoea arborescens	(Humb. & Bonpl. Ex Will.) G.Don	4	Not assessed	0	0	0	0	0	0	0	0	0	0	0	0	0	0	0	1	0	0	0	0	0	0	0	0	0	0	0	0	0	0	0	0	0	0	0	0	0	0	0	0	0	0	0	0
Solanales	Convolvulaceae	Ipomoea carnea	Jacq.	1	Not assessed	1	0	1	0	0	0	0	0	0	0	0	0	0	0	0	0	0	0	0	0	0	0	0	0	0	0	0	0	0	0	0	1	1	0	0	0	0	0	0	0	0	0	0	0
Solanales	Convolvulaceae	Ipomoea lobata	(Cerv.) Thell.	1	Not assessed	0	0	0	0	0	0	0	0	0	0	0	0	0	0	0	0	0	0	0	0	0	0	0	0	0	0	0	0	0	0	0	1	0	0	0	0	0	0	0	0	0	0	0	0
Lamiales	Scrophulariaceae	Ixianthes retzioides	Benth.	1	Not assessed	0	0	0	0	0	0	0	0	0	0	0	0	0	0	0	0	0	0	0	0	0	0	0	0	0	0	0	0	0	0	0	0	0	0	0	0	0	0	1	0	0	0	0	0
Gentianales	Rubiaceae	Ixora coccinea	L.	1	Not assessed	1	0	0	0	0	0	0	0	0	0	0	0	0	0	0	0	0	0	0	0	0	0	0	0	1	0	0	0	0	0	0	0	0	0	0	0	0	0	0	0	0	0	0	0
Gentianales	Rubiaceae	Ixora finlaysoniana	Wall. ex G.Don	1	Not assessed	0	0	1	0	0	0	0	0	0	1	0	0	0	0	0	0	0	0	0	0	0	0	0	0	1	1	1	0	0	0	0	0	0	0	0	0	0	0	0	0	0	0	0	0
Gentianales	Rubiaceae	Ixora hookeri	(Oudem.) Bremek.	1	Not assessed	0	0	0	0	0	0	0	0	0	0	0	0	0	0	0	0	0	0	0	0	0	0	1	0	0	0	0	0	0	0	0	0	0	0	0	0	0	0	0	0	0	0	0	0
Gentianales	Rubiaceae	Ixora javanica	(Blume) DC.	1	Least concern	0	0	0	0	0	0	0	0	0	0	0	0	0	0	0	0	0	0	0	0	0	0	0	0	0	1	1	0	0	0	0	0	0	0	0	0	0	0	0	0	0	0	0	0
Lamiales	Bignoniaceae	Jacaranda mimosifolia	D.Don	35	Vulnerable	1	1	1	1	1	0	0	0	0	0	0	0	0	0	0	0	0	0	0	0	0	0	0	0	0	0	0	0	0	0	0	0	0	0	1	0	1	0	0	0	0	0	0	0
Lamiales	Oleaceae	Jasminum angulare	Vahl	1	Not assessed	0	0	0	0	0	0	0	0	0	0	0	0	0	0	0	0	0	0	0	0	0	1	0	0	0	0	0	0	0	0	0	0	0	0	0	0	0	0	0	0	0	0	0	0
Lamiales	Oleaceae	Jasminum humile	L.	2	Not assessed	1	1	1	0	0	0	0	0	0	1	1	0	0	0	0	0	0	0	0	0	0	0	0	0	0	0	0	0	0	0	0	0	0	0	0	0	0	0	0	0	0	0	0	0
Lamiales	Oleaceae	Jasminum humile cv. 'Revolutum'	L.	1	NA	0	0	0	0	0	0	0	0	0	0	0	0	0	0	0	0	0	0	0	0	0	0	0	0	0	0	0	0	0	0	0	0	0	0	0	0	0	0	0	0	0	0	0	0
Lamiales	Oleaceae	Jasminum multipartitum	Hochst.	2	Not assessed	0	0	0	0	0	0	0	0	0	0	0	0	0	0	0	0	0	0	0	0	0	1	0	0	0	0	0	0	0	0	0	0	0	0	0	0	0	0	0	0	0	0	0	0
Lamiales	Oleaceae	Jasminum nudiflorum	Lindl.	2	Not assessed	0	0	0	0	0	0	0	0	0	1	0	0	0	0	0	0	0	0	0	0	0	0	0	0	0	0	0	0	0	0	0	0	0	0	0	0	0	0	0	0	0	0	0	0
Lamiales	Oleaceae	Jasminum officinale	L.	1	Not assessed	0	0	0	0	0	0	0	0	0	1	0	0	0	0	0	0	0	0	0	0	0	0	0	0	1	1	0	0	0	0	0	0	0	0	0	0	0	0	0	0	0	0	0	0
Lamiales	Oleaceae	Jasminum polyanthum	Franch.	3	Not assessed	1	0	0	0	0	0	0	0	0	1	0	0	0	0	0	0	0	0	0	0	0	0	0	0	0	0	0	0	0	0	0	0	0	0	0	0	0	0	0	0	0	0	0	0
Malpighiales	Euphorbiaceae	Jatropha curcas	L.	2	Not assessed	1	0	1	0	0	0	0	0	0	0	0	0	0	0	0	0	0	0	0	0	0	0	0	0	0	0	0	0	0	0	0	1	0	0	1	1	0	0	0	0	0	0	0	0
Malpighiales	Euphorbiaceae	Jatropha integerrima	Jacq.	1	Not assessed	0	0	0	0	0	0	0	0	0	0	0	0	0	0	0	0	0	0	0	0	0	0	0	0	0	0	0	0	0	0	0	1	0	0	0	0	0	0	0	0	0	0	0	0
Malpighiales	Euphorbiaceae	Jatropha multifida	L.	2	Not assessed	1	0	0	0	0	0	0	0	0	0	0	0	0	0	0	0	0	0	0	0	0	0	0	0	0	0	0	0	0	0	0	1	0	0	0	0	0	0	0	0	0	0	0	0
Arecales	Arecaceae	Jubaea chilensis	Baill.	1	Vulnerable	0	0	0	0	0	0	0	0	0	0	0	0	0	0	0	0	0	0	0	0	0	0	0	0	0	0	0	0	0	0	0	0	0	0	0	1	0	0	0	0	0	0	0	0
Arecales	Arecaceae	Jubaeopsis caffra	Becc.	3	Vulnerable	0	0	0	0	0	0	0	0	0	0	0	0	0	0	0	0	0	0	0	0	0	1	0	0	0	0	0	0	0	0	0	0	0	0	0	0	0	0	0	0	0	0	0	0
Fagales	Juglandaceae	Juglans mandschurica	Maxim.	1	Not assessed	0	0	1	0	1	0	0	0	0	1	0	0	0	0	0	0	0	0	0	0	0	0	0	0	0	0	0	0	0	0	0	0	0	0	0	0	0	0	0	0	0	0	0	0
Fagales	Juglandaceae	Juglans microcarpa	Berland.	1	Not assessed	0	0	0	0	0	0	0	0	0	0	0	0	0	0	1	0	0	0	0	0	0	0	0	0	0	0	0	0	0	0	0	0	0	0	0	0	0	0	0	0	0	0	0	0
Fagales	Juglandaceae	Juglans nigra	L.	2	Near threatened	0	0	0	0	1	0	0	0	0	0	0	0	0	1	1	0	0	0	0	0	0	0	0	0	0	0	0	0	0	0	0	0	0	0	0	0	0	0	0	0	0	0	0	0
Cupressales	Cupressaceae	Juniperus × pfitzeriana	(Späth) P.A. Schmidt	1	Not assessed	0	0	0	0	0	0	0	0	0	0	0	0	0	0	0	0	0	0	0	0	0	0	0	0	0	0	0	0	0	0	0	0	0	0	0	0	0	0	0	0	0	0	0	0
Cupressales	Cupressaceae	Juniperus barbadensis	L.	1	Vulnerable	0	0	0	0	0	0	0	0	0	0	0	0	0	0	0	0	0	0	0	0	0	0	0	0	0	0	0	0	0	0	0	1	0	0	0	0	0	0	0	0	0	0	0	0
Cupressales	Cupressaceae	Juniperus bermudiana	L.	1	Critically endangered	0	0	1	1	0	0	0	0	0	0	0	0	0	0	0	0	0	0	0	0	0	0	0	0	0	0	0	0	0	0	0	1	0	0	0	0	0	0	0	0	0	0	0	0
Cupressales	Cupressaceae	Juniperus brevifolia	Seub.) Antoine	1	Vulnerable	0	0	0	0	0	0	0	0	0	0	0	0	1	0	0	0	0	0	0	0	0	0	0	0	0	0	0	0	0	0	0	0	0	0	0	0	0	0	0	0	0	0	0	0
Cupressales	Cupressaceae	Juniperus chinensis	L.	1	Least concern	0	0	0	0	1	0	0	0	0	1	0	0	0	0	0	0	0	0	0	0	0	0	0	0	0	0	0	0	0	0	0	0	0	0	0	0	0	0	0	0	0	0	0	0
Cupressales	Cupressaceae	Juniperus communis	L.	1	Least concern	0	0	1	0	0	0	0	1	1	0	1	0	0	0	0	0	0	0	0	0	0	0	0	0	0	0	0	0	0	0	0	0	0	0	0	0	0	0	0	0	0	0	0	0
Cupressales	Cupressaceae	Juniperus horizontalis	Moench	1	Least concern	0	0	0	0	0	0	0	0	0	0	0	0	0	1	0	0	0	0	0	0	0	0	0	0	0	0	0	0	0	0	0	0	0	0	0	0	0	0	0	0	0	0	0	0
Cupressales	Cupressaceae	Juniperus procumbens cv. 'Nana'	(Siebold ex Endl.) Miq.	1	NA	0	0	0	0	0	0	0	0	0	0	0	0	0	0	0	0	0	0	0	0	0	0	0	0	0	0	0	0	0	0	0	0	0	0	0	0	0	0	0	0	0	0	0	0
Cupressales	Cupressaceae	Juniperus sabina var. sabina	L.	1	Least concern	0	0	0	0	0	0	0	1	0	1	1	0	0	0	0	0	0	0	0	0	0	0	0	0	0	0	0	0	0	0	0	0	0	0	0	0	0	0	0	0	0	0	0	0
Cupressales	Cupressaceae	Juniperus scopulorum	Sarg.	1	Least concern	0	0	0	0	0	0	0	0	0	0	0	0	0	0	0	1	0	0	0	0	0	0	0	0	0	0	0	0	0	0	0	0	0	0	0	0	0	0	0	0	0	0	0	0
Cupressales	Cupressaceae	Juniperus scopulorum cv. 'Skyrocket'	Sarg.	1	NA	0	0	0	0	0	0	0	0	0	0	0	0	0	0	0	0	0	0	0	0	0	0	0	0	0	0	0	0	0	0	0	0	0	0	0	0	0	0	0	0	0	0	0	0
Cupressales	Cupressaceae	Juniperus semiglobosa	Regel	1	Least concern	0	0	0	0	0	0	0	0	0	0	1	0	0	0	0	0	0	0	0	0	0	0	0	0	0	0	0	0	0	0	0	0	0	0	0	0	0	0	0	0	0	0	0	0
Cupressales	Cupressaceae	Juniperus virginiana	L.	7	Least concern	1	0	1	0	0	0	0	0	0	0	0	0	0	1	1	0	0	0	0	0	0	0	0	0	0	0	0	0	0	0	0	0	0	0	0	0	0	0	0	0	0	0	0	0
Lamiales	Acanthaceae	Justicia aconitiflora	(A.Meeuse) Cubey	1	Not assessed	0	0	0	0	0	0	0	0	0	0	0	0	0	0	0	0	0	0	0	0	0	1	0	0	0	0	0	0	0	0	0	0	0	0	0	0	0	0	0	0	0	0	0	0
Lamiales	Acanthaceae	Justicia adhatodoides	(E.Mey. ex Nees) V.A.W. Graham	8	Least concern	0	0	0	0	0	0	0	0	0	0	0	0	0	0	0	0	0	0	0	0	0	1	0	0	0	0	0	0	0	0	0	0	0	0	0	0	0	0	0	0	0	0	0	0
Saxifragales	Crassulaceae	Kalanchoë beharensis	Drake	4	Not assessed	0	0	0	0	0	0	0	0	0	0	0	0	0	0	0	0	0	0	0	0	0	0	1	0	0	0	0	0	0	0	0	0	0	0	0	0	0	0	0	0	0	0	0	0
Lamiales	Lamiaceae	Karomia speciosa	(Hutch. & Corbishley) R.Fern.	7	Least concern	0	0	0	0	0	0	0	0	0	0	0	0	0	0	0	0	0	0	0	0	0	1	0	0	0	0	0	0	0	0	0	0	0	0	0	0	0	0	0	0	0	0	0	0
Lamiales	Lamiaceae	Karomia tettensis	(Klotzsch) R.Fern.	2	Least concern	0	0	0	0	0	0	0	0	0	0	0	0	0	0	0	0	0	0	0	0	1	0	0	0	0	0	0	0	0	0	0	0	0	0	0	0	0	0	0	0	0	0	0	0
Dipsacales	Caprifoliaceae	Kerria japonica	(L.) DC.	3	Not assessed	0	0	0	0	0	0	0	0	0	1	0	0	0	0	0	0	0	0	0	0	0	0	0	0	0	0	0	0	0	0	0	0	0	0	0	0	0	0	0	0	0	0	0	0
Sapindales	Meliaceae	Khaya anthotheca	(Welw.) C. DC.	10	Vulnerable	0	0	0	0	0	0	0	0	0	0	0	0	0	0	0	0	0	1	0	1	1	0	0	0	0	0	0	0	0	0	0	0	0	0	0	0	0	0	0	0	0	0	0	0
Lamiales	Bignoniaceae	Kigelia africana	(Lam.) Benth.	25	Not assessed	0	0	0	0	0	0	0	0	0	0	0	0	0	0	0	0	0	1	0	1	1	1	0	0	0	0	0	0	0	0	0	0	0	0	0	0	0	0	1	0	0	0	0	0
Malpighiales	Achariaceae	Kiggelaria africana	L.	21	Not assessed	0	0	0	0	1	1	0	0	0	0	0	0	0	0	0	0	0	0	0	0	1	1	0	0	0	0	0	0	0	0	0	0	0	0	0	0	0	0	0	0	0	0	0	0
Sapindales	Kirkiaceae	Kirkia acuminata	Oliv.	7	Least concern	0	0	0	0	0	0	0	0	0	0	0	0	0	0	0	0	0	0	0	0	0	1	0	0	0	0	0	0	0	0	0	0	0	0	0	0	0	0	0	0	0	0	0	0
Sapindales	Kirkiaceae	Kirkia wilmsii	Engl.	7	Not assessed	0	0	0	0	0	0	0	0	0	0	0	0	0	0	0	0	0	0	0	0	0	1	0	0	0	0	0	0	0	0	0	0	0	0	0	0	0	0	0	0	0	0	0	0
Malvales	Sterculiaceae	Kleinhovia hospita	L.	1	Not assessed	0	0	0	0	0	0	0	0	0	1	0	0	0	0	0	0	0	0	0	0	0	0	0	0	1	1	1	0	0	0	1	0	0	0	0	0	0	0	0	1	0	0	0	0
Sapindales	Sapindaceae	Koelreuteria bipinnata	Franch.	1	Not assessed	0	0	0	0	1	0	0	0	0	1	0	0	0	0	0	0	0	0	0	0	0	0	0	0	0	0	0	0	0	0	0	0	0	0	0	0	0	0	0	0	0	0	0	0
Sapindales	Sapindaceae	Koelreuteria elegans	(Seem.) A.C.Sm.	1	Not assessed	0	0	0	0	1	0	0	0	0	0	0	0	0	0	0	0	0	0	0	0	0	0	0	0	0	0	0	0	0	1	0	0	0	0	0	0	0	0	0	0	0	0	0	0
Sapindales	Sapindaceae	Koelreuteria paniculata	Laxm.	3	Least concern	1	0	0	0	0	0	0	0	0	1	0	0	0	0	0	0	0	0	0	0	0	0	0	0	0	0	0	0	0	0	0	0	0	0	0	0	0	0	0	0	0	0	0	0
Gentianales	Apocynaceae	Kopsia fruticosa	(Roxb.) A. DC.	1	Not assessed	0	0	0	0	0	0	0	0	0	0	0	0	0	0	0	0	0	0	0	0	0	0	0	0	0	1	0	0	0	0	0	0	0	0	0	0	0	0	0	0	0	0	0	0
Gentianales	Rubiaceae	Kraussia floribunda	Harv.	7	Least concern	0	0	0	0	0	0	0	0	0	0	0	0	0	0	0	0	0	0	0	0	0	1	0	0	0	0	0	0	0	0	0	0	0	0	0	0	0	0	0	0	0	0	0	0
Asparagales	Asphodelaceae	Kumara plicatilis	(L.) G.D. Rowley	2	Not assessed	0	0	0	0	0	0	0	0	0	0	0	0	0	0	0	0	0	0	0	0	0	0	0	0	0	0	0	0	0	0	0	0	0	0	0	0	0	0	1	0	0	0	0	0
Malpighiales	Phyllanthaceae	Lachnostylis bilocularis	R.A.Dyer	1	Not assessed	0	0	0	0	0	0	0	0	0	0	0	0	0	0	0	0	0	0	0	0	0	0	0	0	0	0	0	0	0	0	0	0	0	0	0	0	0	0	1	0	0	0	0	0
Malpighiales	Phyllanthaceae	Lachnostylis hirta	(L.f.) Müll.Arg.	1	Not assessed	0	0	0	0	0	0	0	0	0	0	0	0	0	0	0	0	0	0	0	0	0	0	0	0	0	0	0	0	0	0	0	0	0	0	0	0	0	0	1	0	0	0	0	0
Myrtales	Lythraceae	Lafoensia vandelliana	DC. Ex Cham. & Schltdlt.	1	Not assessed	0	0	0	0	0	0	0	0	0	0	0	0	0	0	0	0	0	0	0	0	0	0	0	0	0	0	0	0	0	0	0	0	0	1	1	0	0	0	0	0	0	0	0	0
Myrtales	Lythraceae	Lagerstroemia floribunda var. brevifolia	Craib	1	Not assessed	0	0	0	0	0	0	0	0	0	1	0	0	0	0	0	0	0	0	0	0	0	0	0	0	0	1	0	0	0	0	0	0	0	0	0	0	0	0	0	0	0	0	0	0
Myrtales	Lythraceae	Lagerstroemia indica	L.	17	Least concern	1	0	0	0	0	0	0	0	0	1	0	0	0	0	0	0	0	0	0	0	0	0	0	0	1	1	1	0	0	0	0	0	0	0	0	0	0	0	0	0	0	0	0	0
Myrtales	Lythraceae	Lagerstroemia speciosa	(L.) Pers.	1	Not assessed	1	0	0	0	0	0	0	0	0	1	0	0	0	0	0	0	0	0	0	0	0	0	0	0	1	1	1	0	0	0	0	0	0	0	0	0	0	0	0	1	0	0	0	0
Myrtales	Lythraceae	Lagerstroemia x mathewsii	Searl	1	Not assessed	0	0	0	0	0	0	0	0	0	0	0	0	0	0	0	0	0	0	0	0	0	0	0	0	0	0	0	0	0	0	0	0	0	0	0	0	0	0	0	0	0	0	0	0
Malvales	Malvaceae	Lagunaria patersonia	(Andrews) G.Don	10	Not assessed	0	0	0	0	0	0	0	0	0	0	0	0	0	0	0	0	0	0	0	0	0	0	0	0	0	0	0	0	0	0	0	0	0	0	0	0	0	0	0	1	0	0	0	0
Sapindales	Anacardiaceae	Lannea discolor	(Sond.) Engl.	3	Least concern	0	0	0	0	0	0	0	0	0	0	0	0	0	0	0	0	0	0	0	0	1	1	0	0	0	0	0	0	0	0	0	0	0	0	0	0	0	0	0	0	0	0	0	0
Sapindales	Anacardiaceae	Lannea schweinfurthii	(Engl.) Engl.	1	Not assessed	0	0	0	0	0	0	0	0	0	0	0	0	0	0	0	0	0	0	0	0	1	1	0	0	0	0	0	0	0	0	0	0	0	0	0	0	0	0	0	0	0	0	0	0
Lamiales	Verbenaceae	Lantana camara	L.	2	Not assessed	1	0	1	1	0	0	0	0	0	0	0	0	0	0	0	0	0	0	0	0	0	0	0	0	0	0	0	0	0	0	0	1	1	0	0	0	0	0	0	0	0	0	0	0
Lamiales	Verbenaceae	Lantana camara cv. 'Daidem'	L.	1	NA	0	0	0	1	0	0	0	0	0	0	0	0	0	0	0	0	0	0	0	0	0	0	0	0	0	0	0	0	0	0	0	0	0	0	0	0	0	0	0	0	0	0	0	0
Lamiales	Verbenaceae	Lantana rugosa	Thunb.	1	Not assessed	0	0	0	0	0	0	0	0	0	0	0	0	0	0	0	0	0	0	0	0	0	1	0	0	0	0	0	0	0	0	0	0	0	0	0	0	0	0	0	0	0	0	0	0
Pinales	Pinaceae	Larix decidua	Mill.	1	Least concern	0	0	1	0	0	0	0	1	0	0	0	0	0	0	0	0	0	0	0	0	0	0	0	0	0	0	0	0	0	0	0	0	0	0	0	0	0	0	0	0	0	0	0	0
Arecales	Arecaceae	Latania loddigesii	Mart.	1	Endangered	0	0	0	0	0	0	0	0	0	0	0	0	0	0	0	0	0	0	0	0	0	0	1	0	0	0	0	0	0	0	0	0	0	0	0	0	0	0	0	0	0	0	0	0
Arecales	Arecaceae	Latania verschaffeltii	Lem.	1	Endangered	0	0	0	0	0	0	0	0	0	0	0	0	0	0	0	0	0	0	0	0	0	0	1	0	0	0	0	0	0	0	0	0	0	0	0	0	0	0	0	0	0	0	0	0
Celastrales	Celastraceae	Lauridia reticulata	Eckl. & Zeyh.	1	Not assessed	0	0	0	0	0	0	0	0	0	0	0	0	0	0	0	0	0	0	0	0	0	1	0	0	0	0	0	0	0	0	0	0	0	0	0	0	0	0	0	0	0	0	0	0
Celastrales	Celastraceae	Lauridia tetragona	(L.f.) R.H.Archer	1	Not assessed	0	0	0	0	0	0	0	0	0	0	0	0	0	0	0	0	0	0	0	0	0	1	0	0	0	0	0	0	0	0	0	0	0	0	0	0	0	0	0	0	0	0	0	0
Sapindales	Anacardiaceae	Laurophyllus capensis	Thunb.	2	Least concern	0	0	0	0	0	0	0	0	0	0	0	0	0	0	0	0	0	0	0	0	0	0	0	0	0	0	0	0	0	0	0	0	0	0	0	0	0	0	1	0	0	0	0	0
Laurales	Lauraceae	Laurus nobilis	L.	8	Least concern	0	0	1	0	0	0	0	0	0	0	0	1	0	0	0	0	0	0	0	0	0	0	0	0	0	0	0	0	0	0	0	0	0	0	0	0	0	0	0	0	0	0	0	0
Malvales	Malvaceae	Lavatera arborea	L.	1	Not assessed	0	0	1	0	0	0	0	1	0	0	0	1	0	0	0	0	0	0	0	0	0	0	0	0	0	0	0	0	0	0	0	0	0	0	0	0	0	0	0	0	0	0	0	0
Myrtales	Lythraceae	Lawsonia inermis	L.	3	Not assessed	0	0	0	0	0	0	0	0	0	0	0	0	0	0	0	0	0	1	1	1	1	1	1	0	1	0	0	0	0	0	0	0	0	0	0	0	0	0	0	0	0	0	0	0
Ericales	Lecythidaceae	Lecythis zabucajo	Aubl.	1	Not assessed	0	0	0	0	0	0	0	0	0	0	0	0	0	0	0	0	0	0	0	0	0	0	0	0	0	0	0	0	0	0	0	0	1	1	0	0	0	0	0	0	0	0	0	0
Vitales	Vitaceae	Leea guineensis	G.Don	2	Not assessed	0	0	0	0	0	0	0	0	0	1	0	0	0	0	0	0	0	1	0	1	1	0	1	0	1	1	0	0	0	0	0	0	0	0	0	0	0	0	0	0	0	0	0	0
Lamiales	Lamiaceae	Leonotis leonurus	(L.) R.Br.	1	Not assessed	0	0	0	0	0	0	0	0	0	0	0	0	0	0	0	0	0	0	0	0	0	1	0	0	0	0	0	0	0	0	0	0	0	0	0	0	0	0	0	0	0	0	0	0
Lamiales	Lamiaceae	Leonotis ocymifolia	(Burm.f.) Iwarsson	1	Not assessed	0	0	0	0	0	0	0	0	0	0	0	0	0	0	0	0	0	0	1	1	1	1	0	0	0	0	0	0	0	0	0	0	0	0	0	0	0	0	1	0	0	0	0	0
Myrtales	Myrtaceae	Leptospermum semibaccatum	Cheel	1	Not assessed	0	0	0	0	0	0	0	0	0	0	0	0	0	0	0	0	0	0	0	0	0	0	0	0	0	0	0	0	0	0	0	0	0	0	0	0	0	0	0	1	0	0	0	0
Proteales	Proteaceae	Leucadendron album	(Thunb.) Fourc.	1	Not assessed	0	0	0	0	0	0	0	0	0	0	0	0	0	0	0	0	0	0	0	0	0	0	0	0	0	0	0	0	0	0	0	0	0	0	0	0	0	0	1	0	0	0	0	0
Proteales	Proteaceae	Leucadendron argenteum	(L.) R.Br.	6	Vulnerable	0	0	0	0	0	0	0	0	0	0	0	0	0	0	0	0	0	0	0	0	0	0	0	0	0	0	0	0	0	0	0	0	0	0	0	0	0	0	1	0	0	0	0	0
Proteales	Proteaceae	Leucadendron chamelaea	(Lam.) I.Williams	1	Critically endangered	0	0	0	0	0	0	0	0	0	0	0	0	0	0	0	0	0	0	0	0	0	0	0	0	0	0	0	0	0	0	0	0	0	0	0	0	0	0	1	0	0	0	0	0
Proteales	Proteaceae	Leucadendron coniferum	Sieber ex Meisn.	3	Not assessed	0	0	0	0	0	0	0	0	0	0	0	0	0	0	0	0	0	0	0	0	0	0	0	0	0	0	0	0	0	0	0	0	0	0	0	0	0	0	1	0	0	0	0	0
Proteales	Proteaceae	Leucadendron cv. 'Inca Gold'	NA	1	NA	0	0	0	0	0	0	0	0	0	0	0	0	0	0	0	0	0	0	0	0	0	0	0	0	0	0	0	0	0	0	0	0	0	0	0	0	0	0	0	0	0	0	0	0
Proteales	Proteaceae	Leucadendron cv. 'Safari Sunset'	NA	1	NA	0	0	0	0	0	0	0	0	0	0	0	0	0	0	0	0	0	0	0	0	0	0	0	0	0	0	0	0	0	0	0	0	0	0	0	0	0	0	0	0	0	0	0	0
Proteales	Proteaceae	Leucadendron discolor	E. Phillips & Hutch.	2	Vulnerable	0	0	0	0	0	0	0	0	0	0	0	0	0	0	0	0	0	0	0	1	1	1	0	0	0	0	0	0	0	0	0	0	0	0	0	0	0	0	0	0	0	0	0	0
Proteales	Proteaceae	Leucadendron eucalyptifolium	H.Buek ex Meisn.	1	Least concern	0	0	0	0	0	0	0	0	0	0	0	0	0	0	0	0	0	0	0	0	0	0	0	0	0	0	0	0	0	0	0	0	0	0	0	0	0	0	1	0	0	0	0	0
Proteales	Proteaceae	Leucadendron macowanii	E.Phillips	1	Not assessed	0	0	0	0	0	0	0	0	0	0	0	0	0	0	0	0	0	0	0	0	0	0	0	0	0	0	0	0	0	0	0	0	0	0	0	0	0	0	1	0	0	0	0	0
Proteales	Proteaceae	Leucadendron nervosum	E.Phillips & Hutch.	1	Least concern	0	0	0	0	0	0	0	0	0	0	0	0	0	0	0	0	0	0	0	0	0	0	0	0	0	0	0	0	0	0	0	0	0	0	0	0	0	0	1	0	0	0	0	0
Proteales	Proteaceae	Leucadendron pondoense	A.E. van Wyk	1	Not assessed	0	0	0	0	0	0	0	0	0	0	0	0	0	0	0	0	0	0	0	0	0	1	0	0	0	0	0	0	0	0	0	0	0	0	0	0	0	0	0	0	0	0	0	0
Proteales	Proteaceae	Leucadendron pubescens	R.Br.	1	Not assessed	0	0	0	0	0	0	0	0	0	0	0	0	0	0	0	0	0	0	0	0	0	0	0	0	0	0	0	0	0	0	0	0	0	0	0	0	0	0	1	0	0	0	0	0
Proteales	Proteaceae	Leucadendron salignum	P.J.Bergius	1	Not assessed	0	0	0	0	0	0	0	0	0	0	0	0	0	0	0	0	0	0	0	0	0	0	0	0	0	0	0	0	0	0	0	0	0	0	0	0	0	0	1	0	0	0	0	0
Proteales	Proteaceae	Leucadendron teretifolium	(Andrews) I.Williams	1	Not assessed	0	0	0	0	0	0	0	0	0	0	0	0	0	0	0	0	0	0	0	0	0	0	0	0	0	0	0	0	0	0	0	0	0	0	0	0	0	0	1	0	0	0	0	0
Proteales	Proteaceae	Leucadendron xanthoconus	(Kuntze) K.Schum.	1	Least concern	0	0	0	0	0	0	0	0	0	0	0	0	0	0	0	0	0	0	0	0	0	0	0	0	0	0	0	0	0	0	0	0	0	0	0	0	0	0	1	0	0	0	0	0
Fabales	Fabaceae	Leucaena leucocephala	(Lam.) de Wit	2	Not assessed	1	1	1	1	0	0	0	0	0	0	0	0	0	0	0	0	0	0	0	0	0	0	0	0	0	0	0	0	0	0	0	1	0	0	0	0	0	0	0	0	0	0	0	0
Rosales	Rosaceae	Leucosidea sericea	Eckl. & Zeyh.	13	Not assessed	0	0	0	0	0	0	0	0	0	0	0	0	0	0	0	0	0	0	0	0	0	1	0	0	0	0	0	0	0	0	0	0	0	0	0	0	0	0	0	0	0	0	0	0
Proteales	Proteaceae	Leucospermum × conocarpodendron cv. 'Veld Fire'	NA	1	NA	0	0	0	0	0	0	0	0	0	0	0	0	0	0	0	0	0	0	0	0	0	0	0	0	0	0	0	0	0	0	0	0	0	0	0	0	0	0	0	0	0	0	0	0
Proteales	Proteaceae	Leucospermum × glabrum cv. 'Soleil'	NA	1	NA	0	0	0	0	0	0	0	0	0	0	0	0	0	0	0	0	0	0	0	0	0	0	0	0	0	0	0	0	0	0	0	0	0	0	0	0	0	0	0	0	0	0	0	0
Proteales	Proteaceae	Leucospermum conocarpodendron	H.Buek	2	Near threatened	0	0	0	0	0	0	0	0	0	0	0	0	0	0	0	0	0	0	0	0	0	0	0	0	0	0	0	0	0	0	0	0	0	0	0	0	0	0	1	0	0	0	0	0
Proteales	Proteaceae	Leucospermum conocarpodendron subsp. viridum	Rourke	2	Near threatened	0	0	0	0	0	0	0	0	0	0	0	0	0	0	0	0	0	0	0	0	0	0	0	0	0	0	0	0	0	0	0	0	0	0	0	0	0	0	1	0	0	0	0	0
Proteales	Proteaceae	Leucospermum cordifolium	(Salisb. ex Knight) Fourc.	3	Not assessed	0	0	0	0	0	0	0	0	0	0	0	0	0	0	0	0	0	0	0	0	0	0	0	0	0	0	0	0	0	0	0	0	0	0	0	0	0	0	1	0	0	0	0	0
Proteales	Proteaceae	Leucospermum cv. 'High Gold'	NA	1	NA	0	0	0	0	0	0	0	0	0	0	0	0	0	0	0	0	0	0	0	0	0	0	0	0	0	0	0	0	0	0	0	0	0	0	0	0	0	0	0	0	0	0	0	0
Proteales	Proteaceae	Leucospermum grandiflorum	R.Br.	1	Not assessed	0	0	0	0	0	0	0	0	0	0	0	0	0	0	0	0	0	0	0	0	0	0	0	0	0	0	0	0	0	0	0	0	0	0	0	0	0	0	1	0	0	0	0	0
Proteales	Proteaceae	Leucospermum reflexum	H.Buek ex Meisn.	3	Not assessed	0	0	0	0	0	0	0	0	0	0	0	0	0	0	0	0	0	0	0	0	0	0	0	0	0	0	0	0	0	0	0	0	0	0	0	0	0	0	1	0	0	0	0	0
Proteales	Proteaceae	Leucospermum reflexum var. luteum	Rourke	1	Not assessed	0	0	0	0	0	0	0	0	0	0	0	0	0	0	0	0	0	0	0	0	0	0	0	0	0	0	0	0	0	0	0	0	0	0	0	0	0	0	1	0	0	0	0	0
Proteales	Proteaceae	Leucospermum rodolentum	(Salisb. ex Knight) Rourke	1	Not assessed	0	0	0	0	0	0	0	0	0	0	0	0	0	0	0	0	0	0	0	0	0	0	0	0	0	0	0	0	0	0	0	0	0	0	0	0	0	0	1	0	0	0	0	0
Proteales	Proteaceae	Leucospermum saxosum	S.Moore	1	Least concern	0	0	0	0	0	0	0	0	0	0	0	0	0	0	0	0	0	0	0	0	0	1	0	0	0	0	0	0	0	0	0	0	0	0	0	0	0	0	0	0	0	0	0	0
Arecales	Arecaceae	Leucothrinax morrisii	(H.Wendl.) C.Lewis & Zona	1	Not assessed	0	0	0	0	0	0	0	0	0	0	0	0	0	0	0	0	0	0	0	0	0	0	0	0	0	0	0	0	0	0	0	1	0	0	0	0	0	0	0	0	0	0	0	0
Fabales	Fabaceae	Libidibia coriaria	(Jacq.) Schltdl.	1	Not assessed	0	0	0	0	0	0	0	0	0	0	0	0	0	0	0	0	0	0	0	0	0	0	0	0	0	0	0	0	0	0	0	1	1	0	0	0	0	0	0	0	0	0	0	0
Malpighiales	Chrysobalanaceae	Licania tomentosa	(Benth.) Fritsch	1	Not assessed	0	0	0	0	0	0	0	0	0	0	0	0	0	0	0	0	0	0	0	0	0	0	0	0	0	0	0	0	0	0	0	0	0	0	1	0	0	0	0	0	0	0	0	0
Arecales	Arecaceae	Licuala grandis	H.Wendl.	1	Not assessed	0	0	0	0	0	0	0	0	0	0	0	0	0	0	0	0	0	0	0	0	0	0	0	0	0	0	0	0	0	1	0	0	0	0	0	0	0	0	0	0	0	0	0	0
Lamiales	Oleaceae	Ligustrum japonicum	Thunb.	1	Not assessed	1	0	1	0	0	0	0	0	0	1	0	0	0	0	0	0	0	0	0	0	0	0	0	0	0	0	0	0	0	0	0	0	0	0	0	0	0	0	0	0	0	0	0	0
Lamiales	Oleaceae	Ligustrum lucidum	W.T.Aiton	10	Least concern	1	1	1	1	0	0	0	0	0	1	0	0	0	0	0	0	0	0	0	0	0	0	0	0	0	0	0	0	0	0	0	0	0	0	0	0	0	0	0	0	0	0	0	0
Lamiales	Oleaceae	Ligustrum lucidum cv. 'Aureum'	W.T.Aiton	1	NA	0	0	0	0	0	0	0	0	0	0	0	0	0	0	0	0	0	0	0	0	0	0	0	0	0	0	0	0	0	0	0	0	0	0	0	0	0	0	0	0	0	0	0	0
Lamiales	Oleaceae	Ligustrum lucidum cv. 'Excelsum Superbum'	W.T.Aiton	1	NA	0	0	0	0	0	0	0	0	0	0	0	0	0	0	0	0	0	0	0	0	0	0	0	0	0	0	0	0	0	0	0	0	0	0	0	0	0	0	0	0	0	0	0	0
Lamiales	Oleaceae	Ligustrum lucidum cv. 'Tricolor'	W.T.Aiton	1	NA	0	0	0	0	0	0	0	0	0	0	0	0	0	0	0	0	0	0	0	0	0	0	0	0	0	0	0	0	0	0	0	0	0	0	0	0	0	0	0	0	0	0	0	0
Lamiales	Oleaceae	Ligustrum ovalifolium	Hassk.	1	Not assessed	0	0	1	0	0	0	0	0	0	1	0	0	0	0	0	0	0	0	0	0	0	0	0	0	0	0	0	0	0	0	0	0	0	0	0	0	0	0	0	0	0	0	0	0
Lamiales	Oleaceae	Ligustrum ovalifolium cv. 'Aureum'	Hassk.	2	NA	0	0	0	0	0	0	0	0	0	0	0	0	0	0	0	0	0	0	0	0	0	0	0	0	0	0	0	0	0	0	0	0	0	0	0	0	0	0	0	0	0	0	0	0
Lamiales	Oleaceae	Ligustrum sinense	Lour.	1	Not assessed	0	1	1	1	0	0	0	0	0	1	0	0	0	0	0	0	0	0	0	0	0	0	0	0	0	1	0	0	0	0	0	0	0	0	0	0	0	0	0	0	0	0	0	0
Lamiales	Oleaceae	Ligustrum x 'Vicaryi'	Rehder	1	Not assessed	0	0	0	0	0	0	0	0	0	0	0	0	0	0	0	0	0	0	0	0	0	0	0	0	0	0	0	0	0	0	0	0	0	0	0	0	0	0	0	0	0	0	0	0
Lamiales	Verbenaceae	Lippia javanica	(Burm.f.) Spreng.	4	Not assessed	0	0	0	0	0	0	0	0	0	0	0	0	0	0	0	0	0	0	1	0	1	1	0	0	0	0	0	0	0	0	0	0	0	0	0	0	0	0	0	0	0	0	0	0
Saxifragales	Altingiaceae	Liquidambar formosana	Hance	2	Least concern	0	0	0	0	1	0	0	0	0	1	0	0	0	0	0	0	0	0	0	0	0	0	0	0	0	0	0	0	0	0	0	0	0	0	0	0	0	0	0	0	0	0	0	0
Saxifragales	Altingiaceae	Liquidambar styraciflua	L.	25	Least concern	1	0	0	0	1	1	0	0	0	0	0	0	0	1	1	0	0	0	0	0	0	0	0	0	0	0	0	0	0	0	0	0	0	0	0	0	0	0	0	0	0	0	0	0
Magnoliales	Magnoliaceae	Liriodendron tulipifera	L.	10	Least concern	0	0	0	0	0	0	0	0	0	0	0	0	0	1	1	0	0	0	0	0	0	0	0	0	0	0	0	0	0	0	0	0	0	0	0	0	0	0	0	0	0	0	0	0
Magnoliales	Magnoliaceae	Liriodendron tulipifera cv. 'Aurea'	L.	1	NA	0	0	0	0	0	0	0	0	0	0	0	0	0	0	0	0	0	0	0	0	0	0	0	0	0	0	0	0	0	0	0	0	0	0	0	0	0	0	0	0	0	0	0	0
Sapindales	Sapindaceae	Litchi chinensis	Sonn.	3	Not assessed	0	0	0	0	0	0	0	0	0	1	0	0	0	0	0	0	0	0	0	0	0	0	0	0	0	0	0	0	0	0	0	0	0	0	0	0	0	0	0	0	0	0	0	0
Laurales	Lauraceae	Litsea glutinosa	(Lour.) C.B.Rob.	1	Least concern	1	1	1	1	0	0	0	0	0	0	0	0	0	0	0	0	0	0	0	0	0	0	0	0	1	1	1	0	0	0	1	0	0	0	0	0	0	0	0	1	0	0	0	0
Arecales	Arecaceae	Livistona australis	(R.Br.) Mart.	3	Not assessed	0	0	0	0	0	0	0	0	0	0	0	0	0	0	0	0	0	0	0	0	0	0	0	0	0	0	0	0	0	0	0	0	0	0	0	0	0	0	0	1	0	0	0	0
Arecales	Arecaceae	Livistona chinensis	R.Br.	15	Not assessed	0	0	1	1	1	0	0	0	0	1	0	0	0	0	0	0	0	0	0	0	0	0	0	0	0	0	0	0	0	0	0	0	0	0	0	0	0	0	0	0	0	0	0	0
Arecales	Arecaceae	Livistona decora	(W.Bull.) Dowe	1	Least concern	0	0	0	0	0	0	0	0	0	0	0	0	0	0	0	0	0	0	0	0	0	0	0	0	0	0	0	0	0	0	0	0	0	0	0	0	0	0	0	1	0	0	0	0
Arecales	Arecaceae	Livistona jenkinsiana	Griff.	1	Not assessed	0	0	0	0	0	0	0	0	0	0	0	0	0	0	0	0	0	0	0	0	0	0	0	0	0	1	0	0	0	0	0	0	0	0	0	0	0	0	0	0	0	0	0	0
Arecales	Arecaceae	Livistona mariae	F.Muell.	1	Least concern	0	0	0	0	0	0	0	0	0	0	0	0	0	0	0	0	0	0	0	0	0	0	0	0	0	0	0	0	0	0	0	0	0	0	0	0	0	0	0	1	0	0	0	0
Fabales	Fabaceae	Lonchocarpus sericeus	(Poir.) Kunth ex DC.	1	Least concern	0	0	0	0	0	0	0	0	0	0	0	0	0	0	0	0	0	0	0	1	0	0	0	0	0	0	0	0	0	0	0	1	1	1	1	0	0	0	0	0	0	0	0	0
Dipsacales	Caprifoliaceae	Lonicera ligustrina var. yunnanensis	Franch.	1	Not assessed	0	0	0	0	0	0	0	0	0	1	0	0	0	0	0	0	0	0	0	0	0	0	0	0	0	0	0	0	0	0	0	0	0	0	0	0	0	0	0	0	0	0	0	0
Dipsacales	Caprifoliaceae	Lonicera periclymenum	Gouan	1	Not assessed	0	0	0	0	0	0	0	1	0	0	0	1	0	0	0	0	0	0	0	0	0	0	0	0	0	0	0	0	0	0	0	0	0	0	0	0	0	0	0	0	0	0	0	0
Asterales	Asteraceae	Lopholaena coriifolia	(Sond.) E.Phillips & C.A.Sm.	1	Not assessed	0	0	0	0	0	0	0	0	0	0	0	0	0	0	0	0	0	0	0	0	0	1	0	0	0	0	0	0	0	0	0	0	0	0	0	0	0	0	0	0	0	0	0	0
Myrtales	Myrtaceae	Lophostemon confertus	(R.Br.) P.G. Wilson & J.T. Waterh.	12	Not assessed	0	0	0	0	0	0	0	0	0	0	0	0	0	0	0	0	0	0	0	0	0	0	0	0	0	0	0	0	0	0	0	0	0	0	0	0	0	0	0	1	0	0	0	0
Sapindales	Anacardiaceae	Loxostylis alata	Spreng. ex Rchb.	10	Not assessed	0	0	0	0	0	0	0	0	0	0	0	0	0	0	0	0	0	0	0	0	0	1	0	0	0	0	0	0	0	0	0	0	0	0	0	0	0	0	0	0	0	0	0	0
Malvales	Malvaceae	Luehea divaricata	Mart.	1	Data deficient	0	0	0	0	1	0	0	0	0	0	0	0	0	0	0	0	0	0	0	0	0	0	0	0	0	0	0	0	0	0	0	0	0	1	1	0	0	0	0	0	0	0	0	0
Malvales	Malvaceae	Luehea speciosa	Willd.	1	Not assessed	0	0	0	0	0	0	0	0	0	0	0	0	0	0	0	0	0	0	0	0	0	0	0	0	0	0	0	0	0	0	0	1	1	1	0	0	0	0	0	0	0	0	0	0
Solanales	Solanaceae	Lycium ferocissimum	Miers	2	Not assessed	0	0	1	0	0	0	0	0	0	0	0	0	0	0	0	0	0	0	0	0	0	1	0	0	0	0	0	0	0	0	0	0	0	0	0	0	0	0	0	0	0	0	0	0
Solanales	Solanaceae	Lycium oxycarpum	Dunal	1	Least concern	0	0	0	0	0	0	0	0	0	0	0	0	0	0	0	0	0	0	0	0	0	1	0	0	0	0	0	0	0	0	0	0	0	0	0	0	0	0	1	0	0	0	0	0
Celastrales	Celastraceae	Lydenburgia abbottii	(A.E. van Wyk & Prins) Steenkamp, A.E. van Wyk & Prins	1	Not assessed	0	0	0	0	0	0	0	0	0	0	0	0	0	0	0	0	0	0	0	0	0	1	0	0	0	0	0	0	0	0	0	0	0	0	0	0	0	0	0	0	0	0	0	0
Celastrales	Celastraceae	Lydenburgia cassinoides	N.Robson	2	Not assessed	0	0	0	0	0	0	0	0	0	0	0	0	0	0	0	0	0	0	0	0	0	1	0	0	0	0	0	0	0	0	0	0	0	0	0	0	0	0	0	0	0	0	0	0
Fabales	Fabaceae	Lysiloma latisiliqua	(L.) Benth.	1	Not assessed	0	0	0	0	0	0	0	0	0	0	0	0	0	0	0	0	0	0	0	0	0	0	0	0	0	0	0	0	0	0	0	1	0	0	0	0	0	0	0	0	0	0	0	0
Proteales	Proteaceae	Macadamia integrifolia	Maiden & Betche	6	Not assessed	0	0	0	0	1	0	0	0	0	0	0	0	0	0	0	0	0	0	0	0	0	0	0	0	0	0	0	0	0	0	0	0	0	0	0	0	0	0	0	1	0	0	0	0
Proteales	Proteaceae	Macadamia ternifolia	F.Muell.	1	Not assessed	0	0	0	0	0	0	0	0	0	0	0	0	0	0	0	0	0	0	0	0	0	0	0	0	0	0	0	0	0	0	0	0	0	0	0	0	0	0	0	1	0	0	0	0
Proteales	Proteaceae	Macadamia tetraphylla	L.A.S.Johnson	1	Not assessed	0	0	1	0	0	0	0	0	0	0	0	0	0	0	0	0	0	0	0	0	0	0	0	0	0	0	0	0	0	0	0	0	0	0	0	0	0	0	0	1	0	0	0	0
Malpighiales	Euphorbiaceae	Macaranga capensis	(Baill.) Benth. ex Sim	4	Least concern	0	0	0	0	0	0	0	0	0	0	0	0	0	0	0	0	0	0	1	1	1	1	0	0	0	0	0	0	0	0	0	0	0	0	0	0	0	0	0	0	0	0	0	0
Fabales	Fabaceae	Macfadyena unguis-cati	(L.) A.H.Gentry	2	Not assessed	1	1	0	1	0	0	0	0	0	0	0	0	0	0	0	0	0	0	0	0	0	0	0	0	0	0	0	0	0	0	0	1	1	1	1	0	0	0	0	0	0	0	0	0
Lamiales	Acanthaceae	Mackaya bella	Harv.	8	Not assessed	0	0	0	0	0	0	0	0	0	0	0	0	0	0	0	0	0	0	0	0	0	1	0	0	0	0	0	0	0	0	0	0	0	0	0	0	0	0	0	0	0	0	0	0
Ranunculales	Papaveraceae	Macleaya cordata	(Willd.) R.Br.	1	Not assessed	0	0	0	0	0	0	0	0	0	1	0	0	0	0	0	0	0	0	0	0	0	0	0	0	0	0	0	0	0	0	0	0	0	0	0	0	0	0	0	0	0	0	0	0
Rosales	Moraceae	Maclura africana	(Bureau) Corner	1	Least concern	0	0	0	0	0	0	0	0	0	0	0	0	0	0	0	0	0	0	0	0	1	1	1	0	0	0	0	0	0	0	0	0	0	0	0	0	0	0	0	0	0	0	0	0
Rosales	Moraceae	Maclura pomifera	(Raf.) C.K.Schneid.	2	Least concern	0	0	1	0	0	0	0	0	0	0	0	0	0	1	1	0	0	0	0	0	0	0	0	0	0	0	0	0	0	0	0	0	0	0	0	0	0	0	0	0	0	0	0	0
Rosales	Moraceae	Maclura tinctoria	(L.) D. Don ex Steud.	1	Least concern	0	0	0	0	0	0	0	0	0	0	0	0	0	0	0	0	0	0	0	0	0	0	0	0	0	0	0	0	0	0	0	1	1	1	1	0	0	0	0	0	0	0	0	0
Brassicales	Capparaceae	Maerua angolensis subsp. angolensis	DC.	1	Not assessed	0	0	0	0	0	0	0	0	0	0	0	0	0	0	0	0	0	1	1	1	1	1	0	0	0	0	0	0	0	0	0	0	0	0	0	0	0	0	0	0	0	0	0	0
Brassicales	Capparaceae	Maerua cafra	(DC.) Pax	2	Least concern	0	0	0	0	0	0	0	0	0	0	0	0	0	0	0	0	0	0	0	0	0	1	0	0	0	0	0	0	0	0	0	0	0	0	0	0	0	0	0	0	0	0	0	0
Ericales	Primulaceae	Maesa lanceolata	Forssk.	7	Least concern	0	0	0	0	0	0	0	0	0	0	0	0	0	0	0	0	0	1	1	1	1	1	1	0	0	0	0	0	0	0	0	0	0	0	0	0	0	0	0	0	0	0	0	0
Rosales	Rhamnaceae	Maesopsis eminii	Engl.	1	Least concern	0	0	1	0	0	0	0	0	0	0	0	0	0	0	0	0	0	0	0	1	0	0	0	0	0	0	0	0	0	0	0	0	0	0	0	0	0	0	0	0	0	0	0	0
Magnoliales	Magnoliaceae	Magnolia × soulangeana	Soul.-Bod.	6	Data deficient	0	0	0	0	0	0	0	0	0	0	0	0	0	0	0	0	0	0	0	0	0	0	0	0	0	0	0	0	0	0	0	0	0	0	0	0	0	0	0	0	0	0	0	0
Magnoliales	Magnoliaceae	Magnolia × soulangeana cv. 'Lennei'	Soul.-Bod.	1	Data deficient	0	0	0	0	0	0	0	0	0	0	0	0	0	0	0	0	0	0	0	0	0	0	0	0	0	0	0	0	0	0	0	0	0	0	0	0	0	0	0	0	0	0	0	0
Magnoliales	Magnoliaceae	Magnolia × soulangeana cv. 'Rubra'	Soul.-Bod.	1	Data deficient	0	0	0	0	0	0	0	0	0	0	0	0	0	0	0	0	0	0	0	0	0	0	0	0	0	0	0	0	0	0	0	0	0	0	0	0	0	0	0	0	0	0	0	0
Magnoliales	Magnoliaceae	Magnolia ashei	Weath.	1	Least concern	0	0	0	0	0	0	0	0	0	0	0	0	0	1	1	0	0	0	0	0	0	0	0	0	0	0	0	0	0	0	0	0	0	0	0	0	0	0	0	0	0	0	0	0
Magnoliales	Magnoliaceae	Magnolia figo	(Lour.) DC.	5	Least concern	0	0	0	0	0	0	0	0	0	1	0	0	0	0	0	0	0	0	0	0	0	0	0	0	0	0	0	0	0	0	0	0	0	0	0	0	0	0	0	0	0	0	0	0
Magnoliales	Magnoliaceae	Magnolia grandiflora	L.	22	Least concern	0	0	0	0	1	0	0	0	0	0	0	0	0	0	1	0	0	0	0	0	0	0	0	0	0	0	0	0	0	0	0	0	0	0	0	0	0	0	0	0	0	0	0	0
Magnoliales	Magnoliaceae	Magnolia kobus	DC.	1	Data deficient	0	0	0	0	0	0	0	0	0	1	0	0	0	0	0	0	0	0	0	0	0	0	0	0	0	0	0	0	0	0	0	0	0	0	0	0	0	0	0	0	0	0	0	0
Magnoliales	Magnoliaceae	Magnolia liliiflora cv. 'Nigra'	Desr.	1	NA	0	0	0	0	0	0	0	0	0	0	0	0	0	0	0	0	0	0	0	0	0	0	0	0	0	0	0	0	0	0	0	0	0	0	0	0	0	0	0	0	0	0	0	0
Magnoliales	Magnoliaceae	Magnolia sprengeri	Pamp.	1	Least concern	0	0	0	0	0	0	0	0	0	1	0	0	0	0	0	0	0	0	0	0	0	0	0	0	0	0	0	0	0	0	0	0	0	0	0	0	0	0	0	0	0	0	0	0
Magnoliales	Magnoliaceae	Magnolia tripetala	L.	1	Least concern	0	0	0	0	0	0	0	0	0	0	0	0	0	1	1	0	0	0	0	0	0	0	0	0	0	0	0	0	0	0	0	0	0	0	0	0	0	0	0	0	0	0	0	0
Ranunculales	Berberidaceae	Mahonia oiwakensis	Hayata	6	Vulnerable	0	0	0	0	0	0	0	0	0	1	0	0	0	0	0	0	0	0	0	0	0	0	0	0	0	0	0	0	0	0	0	0	0	0	0	0	0	0	0	0	0	0	0	0
Malpighiales	Euphorbiaceae	Mallotus japonicus	(Spreng.) Müll. Arg.	1	Not assessed	0	0	0	0	0	0	0	0	0	1	0	0	0	0	0	0	0	0	0	0	0	0	0	0	0	0	0	0	0	0	0	0	0	0	0	0	0	0	0	0	0	0	0	0
Rosales	Rosaceae	Malus × purpurea	(E.Barbier) Rehder	1	Not assessed	0	0	0	0	0	0	0	0	0	0	0	0	0	0	0	0	0	0	0	0	0	0	0	0	0	0	0	0	0	0	0	0	0	0	0	0	0	0	0	0	0	0	0	0
Rosales	Rosaceae	Malus × purpurea cv. 'Limoinei'	(E.Barbier) Rehder	1	NA	0	0	0	0	0	0	0	0	0	0	0	0	0	0	0	0	0	0	0	0	0	0	0	0	0	0	0	0	0	0	0	0	0	0	0	0	0	0	0	0	0	0	0	0
Rosales	Rosaceae	Malus floribunda	Siebold ex Van Houtte	6	Not assessed	0	0	0	0	1	0	0	0	0	1	0	0	0	0	0	0	0	0	0	0	0	0	0	0	0	0	0	0	0	0	0	0	0	0	0	0	0	0	0	0	0	0	0	0
Rosales	Rosaceae	Malus hupuhensis	(Pamp.) Rehder	1	Least concern	0	0	0	0	0	0	0	0	0	1	0	0	0	0	0	0	0	0	0	0	0	0	0	0	0	0	0	0	0	0	0	0	0	0	0	0	0	0	0	0	0	0	0	0
Rosales	Rosaceae	Malus pumila cv. 'Flower of Kent'	Mill.	1	NA	0	0	0	0	0	0	0	0	0	0	0	0	0	0	0	0	0	0	0	0	0	0	0	0	0	0	0	0	0	0	0	0	0	0	0	0	0	0	0	0	0	0	0	0
Rosales	Rosaceae	Malus spectabilis	(Aiton) Borkh.	1	Data deficient	0	0	0	0	0	0	0	0	0	1	0	0	0	0	0	0	0	0	0	0	0	0	0	0	0	0	0	0	0	0	0	0	0	0	0	0	0	0	0	0	0	0	0	0
Rosales	Rosaceae	Malus sylvestris	Mill.	2	Data deficient	0	0	0	0	0	0	0	1	0	0	0	1	0	0	0	0	0	0	0	0	0	0	0	0	0	0	0	0	0	0	0	0	0	0	0	0	0	0	0	0	0	0	0	0
Malvales	Malvaceae	Malvaviscus arboreus	Cav.	3	Least concern	1	0	0	0	0	0	0	0	0	0	0	0	0	0	0	0	0	0	0	0	0	0	0	0	0	0	0	0	0	0	0	1	0	0	0	0	0	0	0	0	0	0	0	0
Malpighiales	Calophyllaceae	Mammea americana	L.	2	Not assessed	0	0	0	0	0	0	0	0	0	0	0	0	0	0	0	0	0	0	0	0	0	0	0	0	0	0	0	0	0	0	0	1	0	0	0	0	0	0	0	0	0	0	0	0
Gentianales	Apocynaceae	Mandevilla spendens	(Hook.) Woodson	1	Not assessed	0	0	0	0	0	0	0	0	0	0	0	0	0	0	0	0	0	0	0	0	0	0	0	0	0	0	0	0	0	0	0	0	0	0	1	0	0	0	0	0	0	0	0	0
Sapindales	Anacardiaceae	Mangifera indica	L.	7	Data deficient	1	0	1	0	0	0	0	0	0	0	0	0	0	0	0	0	0	0	0	0	0	0	0	0	1	1	0	0	0	0	0	0	0	0	0	0	0	0	0	0	0	0	0	0
Malpighiales	Euphorbiaceae	Manihot esculenta	Crantz	3	Not assessed	1	0	0	0	0	0	0	0	0	0	0	0	0	0	0	0	0	0	0	0	0	0	0	0	0	0	0	0	0	0	0	0	0	0	0	0	0	0	0	0	0	0	0	0
Malpighiales	Euphorbiaceae	Manihot glaziovii	Müll. Arg.	1	Not assessed	0	0	1	0	0	0	0	0	0	0	0	0	0	0	0	0	0	0	0	0	0	0	0	0	0	0	0	0	0	0	0	0	0	0	1	0	0	0	0	0	0	0	0	0
Ericales	Sapotaceae	Manilkara discolor	(Sond.) J.H. Hemsl.	3	Least concern	0	0	0	0	0	0	0	0	0	0	0	0	0	0	0	0	0	0	0	0	1	1	0	0	0	0	0	0	0	0	0	0	0	0	0	0	0	0	0	0	0	0	0	0
Ericales	Sapotaceae	Manilkara mochisia	(Baker) Dubard	1	Least concern	0	0	0	0	0	0	0	0	0	0	0	0	0	0	0	0	0	0	1	0	1	1	0	0	0	0	0	0	0	0	0	0	0	0	0	0	0	0	0	0	0	0	0	0
Ericales	Sapotaceae	Manilkara nicholsonii	A.E. van Wyk	1	Endangered	0	0	0	0	0	0	0	0	0	0	0	0	0	0	0	0	0	0	0	0	0	1	0	0	0	0	0	0	0	0	0	0	0	0	0	0	0	0	0	0	0	0	0	0
Ericales	Sapotaceae	Manilkara zapota	(L.) P.Royen	1	Least concern	0	0	0	0	0	0	0	0	0	0	0	0	0	0	0	0	0	0	0	0	0	0	0	0	0	0	0	0	0	0	0	1	0	0	0	0	0	0	0	0	0	0	0	0
Malpighiales	Phyllanthaceae	Margaritaria discoidea	(Baill.) G.L.Webster	1	Least concern	0	0	0	0	0	0	0	0	0	0	0	0	0	0	0	0	0	0	0	1	1	1	0	0	0	0	0	0	0	0	0	0	0	0	0	0	0	0	0	0	0	0	0	0
Malpighiales	Phyllanthaceae	Margaritaria discoidea var. fagifolia	(Pax) Radcl.-Sm.	1	Not assessed	0	0	0	0	0	0	0	0	0	0	0	0	0	0	0	0	0	0	0	1	1	1	0	0	0	0	0	0	0	0	0	0	0	0	0	0	0	0	0	0	0	0	0	0
Lamiales	Bignoniaceae	Markhamia lutea	(Benth.) K.Schum.	2	Not assessed	0	0	0	0	0	0	0	0	0	0	0	0	0	0	0	0	0	1	0	1	0	0	0	0	0	0	0	0	0	0	0	0	0	0	0	0	0	0	0	0	0	0	0	0
Lamiales	Bignoniaceae	Markhamia obtusifolia	(Baker) Sprague	1	Least concern	0	0	0	0	0	0	0	0	0	0	0	0	0	0	0	0	0	0	0	0	0	1	0	0	0	0	0	0	0	0	0	0	0	0	0	0	0	0	0	0	0	0	0	0
Lamiales	Bignoniaceae	Markhamia zanzibarica	(Bojer ex DC.) K.Schum.	5	Least concern	0	0	0	0	0	0	0	0	0	0	0	0	0	0	0	0	0	0	1	1	1	1	0	0	0	0	0	0	0	0	0	0	0	0	0	0	0	0	0	0	0	0	0	0
Gentianales	Apocynaceae	Mascarenhasia arborescens	A.DC.	1	Least concern	0	0	0	0	0	0	0	0	0	0	0	0	0	0	0	0	0	0	0	1	1	0	1	0	0	0	0	0	0	0	0	0	0	0	0	0	0	0	0	0	0	0	0	0
Celastrales	Celastraceae	Maurocenia frangula	Mill.	3	Not assessed	0	0	0	0	0	0	0	0	0	0	0	0	0	0	0	0	0	0	0	0	0	0	0	0	0	0	0	0	0	0	0	0	0	0	0	0	0	0	1	0	0	0	0	0
Celastrales	Celastraceae	Maytenus acuminata	(L.f.) Loes.	5	Least concern	0	0	0	0	0	0	0	0	0	0	0	0	0	0	0	0	0	0	0	1	1	1	0	0	0	0	0	0	0	0	0	0	0	0	0	0	0	0	0	0	0	0	0	0
Celastrales	Celastraceae	Maytenus heterophylla	(Eckl. & Zeyh.) N.Robson	1	Least concern	0	0	0	0	0	0	0	0	0	0	0	0	0	0	0	0	0	1	1	1	1	1	1	0	0	0	0	0	0	0	0	0	0	0	0	0	0	0	0	0	0	0	0	0
Celastrales	Celastraceae	Maytenus lucida	(L.) Loes.	1	Not assessed	0	0	0	0	0	0	0	0	0	0	0	0	0	0	0	0	0	0	0	0	0	0	0	0	0	0	0	0	0	0	0	0	0	0	0	0	0	0	1	0	0	0	0	0
Celastrales	Celastraceae	Maytenus oleoides	(Lam.) Loes.	1	Least concern	0	0	0	0	0	0	0	0	0	0	0	0	0	0	0	0	0	0	0	0	0	1	0	0	0	0	0	0	0	0	0	0	0	0	0	0	0	0	1	0	0	0	0	0
Celastrales	Celastraceae	Maytenus peduncularis	(Sond.) Loes.	3	Least concern	0	0	0	0	0	0	0	0	0	0	0	0	0	0	0	0	0	0	0	0	0	1	0	0	0	0	0	0	0	0	0	0	0	0	0	0	0	0	0	0	0	0	0	0
Celastrales	Celastraceae	Maytenus procumbens	(L.f.) Loes.	4	Least concern	0	0	0	0	0	0	0	0	0	0	0	0	0	0	0	0	0	0	0	0	0	1	0	0	0	0	0	0	0	0	0	0	0	0	0	0	0	0	0	0	0	0	0	0
Celastrales	Celastraceae	Maytenus undata	(Thunb.) Blakelock	7	Least concern	0	0	0	0	0	0	0	0	0	0	0	0	0	0	0	0	0	1	1	1	1	1	1	0	0	0	0	0	0	0	0	0	0	0	0	0	0	0	0	0	0	0	0	0
Lamiales	Acanthaceae	Megaskepasma erythrochlamys	Lindau	2	Not assessed	0	0	0	0	0	0	0	0	0	0	0	0	0	0	0	0	0	0	0	0	0	0	0	0	0	0	0	0	0	0	0	0	1	0	0	0	0	0	0	0	0	0	0	0
Myrtales	Myrtaceae	Melaleuca alternifolia	(Maiden & Betche) Cheel	4	Not assessed	0	0	0	0	0	0	0	0	0	0	0	0	0	0	0	0	0	0	0	0	0	0	0	0	0	0	0	0	0	0	0	0	0	0	0	0	0	0	0	1	0	0	0	0
Myrtales	Myrtaceae	Melaleuca armillaris	(Sol. ex Gaertn.) Sm.	3	Not assessed	1	0	0	0	0	0	0	0	0	0	0	0	0	0	0	0	0	0	0	0	0	0	0	0	0	0	0	0	0	0	0	0	0	0	0	0	0	0	0	1	0	0	0	0
Myrtales	Myrtaceae	Melaleuca bracteata	F.Muell.	10	Not assessed	0	0	0	0	0	0	0	0	0	0	0	0	0	0	0	0	0	0	0	0	0	0	0	0	0	0	0	0	0	0	0	0	0	0	0	0	0	0	0	1	0	0	0	0
Myrtales	Myrtaceae	Melaleuca cuticularis	Labill.	1	Not assessed	0	0	0	0	0	0	0	0	0	0	0	0	0	0	0	0	0	0	0	0	0	0	0	0	0	0	0	0	0	0	0	0	0	0	0	0	0	0	0	0	1	0	0	0
Myrtales	Myrtaceae	Melaleuca decora	(Salisb.) Britten	1	Least concern	0	0	0	0	0	0	0	0	0	0	0	0	0	0	0	0	0	0	0	0	0	0	0	0	0	0	0	0	0	0	0	0	0	0	0	0	0	0	0	1	0	0	0	0
Myrtales	Myrtaceae	Melaleuca ericifolia	Sm.	2	Not assessed	0	0	0	0	0	0	0	0	0	0	0	0	0	0	0	0	0	0	0	0	0	0	0	0	0	0	0	0	0	0	0	0	0	0	0	0	0	0	0	1	0	0	0	0
Myrtales	Myrtaceae	Melaleuca hypericifolia	Sm.	2	Not assessed	1	0	1	0	0	0	0	0	0	0	0	0	0	0	0	0	0	0	0	0	0	0	0	0	0	0	0	0	0	0	0	0	0	0	0	0	0	0	0	1	0	0	0	0
Myrtales	Myrtaceae	Melaleuca leucadendra	(L.) L.	2	Not assessed	0	0	0	0	0	0	0	0	0	0	0	0	0	0	0	0	0	0	0	0	0	0	0	0	0	0	1	0	0	0	0	0	0	0	0	0	0	0	0	1	0	0	0	0
Myrtales	Myrtaceae	Melaleuca linariifolia	Sm.	4	Least concern	0	0	0	0	0	0	0	0	0	0	0	0	0	0	0	0	0	0	0	0	0	0	0	0	0	0	0	0	0	0	0	0	0	0	0	0	0	0	0	1	0	0	0	0
Myrtales	Myrtaceae	Melaleuca nesophila	F.Muell.	1	Not assessed	1	0	0	0	0	0	0	0	0	0	0	0	0	0	0	0	0	0	0	0	0	0	0	0	0	0	0	0	0	0	0	0	0	0	0	0	0	0	0	0	1	0	0	0
Myrtales	Myrtaceae	Melaleuca quinquenervia	(Cav.) S.T.Blake	6	Least concern	1	1	1	1	0	0	0	0	0	0	0	0	0	0	0	0	0	0	0	0	0	0	0	0	0	0	0	0	0	0	0	0	0	0	0	0	0	0	0	1	0	0	0	0
Myrtales	Myrtaceae	Melaleuca saligna	Schauer	1	Not assessed	0	0	0	0	0	0	0	0	0	0	0	0	0	0	0	0	0	0	0	0	0	0	0	0	0	0	0	0	0	0	0	0	0	0	0	0	0	0	0	1	0	0	0	0
Myrtales	Myrtaceae	Melaleuca styphelioides	Sm.	12	Least concern	1	0	1	0	0	0	0	0	0	0	0	0	0	0	0	0	0	0	0	0	0	0	0	0	0	0	0	0	0	0	0	0	0	0	0	0	0	0	0	1	0	0	0	0
Sapindales	Meliaceae	Melia azedarach	L.	15	Least concern	1	1	1	1	1	0	0	0	0	1	0	0	0	0	0	0	0	0	0	0	0	0	0	0	1	1	0	0	0	0	0	0	0	0	0	0	0	0	0	0	0	0	0	0
Geraniales	Francoaceae	Melianthus comosus	Vahl	2	Least concern	0	0	1	0	0	0	0	0	0	0	0	0	0	0	0	0	0	0	0	0	0	1	0	0	0	0	0	0	0	0	0	0	0	0	0	0	0	0	1	0	0	0	0	0
Geraniales	Francoaceae	Melianthus elongatus	Wijnands	2	Not assessed	0	0	0	0	0	0	0	0	0	0	0	0	0	0	0	0	0	0	0	0	0	1	0	0	0	0	0	0	0	0	0	0	0	0	0	0	0	0	1	0	0	0	0	0
Geraniales	Francoaceae	Melianthus major	L.	4	Not assessed	0	1	1	0	0	0	0	0	0	0	0	0	0	0	0	0	0	0	0	0	0	1	0	0	0	0	0	0	0	0	0	0	0	0	0	0	0	0	1	0	0	0	0	0
Geraniales	Francoaceae	Melianthus villosus	Bolus	1	Not assessed	0	0	0	0	0	0	0	0	0	0	0	0	0	0	0	0	0	0	0	0	0	1	0	0	0	0	0	0	0	0	0	0	0	0	0	0	0	0	1	0	0	0	0	0
Myrtales	Melastomataceae	Memecylon bachmannii	Engl.	1	Not assessed	0	0	0	0	0	0	0	0	0	0	0	0	0	0	0	0	0	0	0	0	0	1	0	0	0	0	0	0	0	0	0	0	0	0	0	0	0	0	0	0	0	0	0	0
Myrtales	Melastomataceae	Memecylon umbellatum	Burm. f.	1	Not assessed	0	0	0	0	0	0	0	0	0	0	0	0	0	0	0	0	0	0	0	0	0	0	0	0	1	1	1	0	0	0	0	0	0	0	0	0	0	0	0	0	0	0	0	0
Rosales	Rosaceae	Mespilus germanica	L.	1	Least concern	0	0	0	0	0	0	0	1	0	0	1	0	0	0	0	0	0	0	0	0	0	0	0	0	0	0	0	0	0	0	0	0	0	0	0	0	0	0	0	0	0	0	0	0
Lamiales	Acanthaceae	Metarungia longistrobus	Baden	1	Not assessed	0	0	0	0	0	0	0	0	0	0	0	0	0	0	0	0	0	0	0	0	0	1	0	0	0	0	0	0	0	0	0	0	0	0	0	0	0	0	0	0	0	0	0	0
Cupressales	Cupressaceae	Metasequoia glyptostroboides	Hu & W.C.Cheng	8	Endangered	1	0	0	0	1	0	0	0	0	1	0	0	0	0	0	0	0	0	0	0	0	0	0	0	0	0	0	0	0	0	0	0	0	0	0	0	0	0	0	0	0	0	0	0
Myrtales	Myrtaceae	Metrosideros angustifolia	(L.) Sm.	6	Not assessed	0	0	0	0	0	0	0	0	0	0	0	0	0	0	0	0	0	0	0	0	0	0	0	0	0	0	0	0	0	0	0	0	0	0	0	0	0	0	1	0	0	0	0	0
Myrtales	Myrtaceae	Metrosideros excelsa	Gaertn.	11	Not assessed	1	0	1	0	0	0	0	0	0	0	0	0	0	0	0	0	0	0	0	0	0	0	0	0	0	0	0	0	0	0	0	0	0	0	0	0	0	0	0	0	0	0	1	0
Myrtales	Myrtaceae	Metrosideros excelsa cv. 'Variegata'	Gaertn.	1	NA	0	0	0	0	0	0	0	0	0	0	0	0	0	0	0	0	0	0	0	0	0	0	0	0	0	0	0	0	0	0	0	0	0	0	0	0	0	0	0	0	0	0	0	0
Myrtales	Myrtaceae	Metrosideros kermadecensis	W.R.B. Oliv.	1	Not assessed	0	0	0	0	0	0	0	0	0	0	0	0	0	0	0	0	0	0	0	0	0	0	0	0	0	0	0	0	0	0	0	0	0	0	0	0	0	0	0	0	0	0	1	0
Magnoliales	Magnoliaceae	Michelia champaca	L.	3	Least concern	0	0	1	0	0	0	0	0	0	1	0	0	0	0	0	0	0	0	0	0	0	0	0	0	1	1	1	0	0	0	0	0	0	0	0	0	0	0	0	0	0	0	0	0
Magnoliales	Magnoliaceae	Michelia figo	(Lour.) Spreng.	3	Least concern	0	0	0	0	0	0	0	0	0	0	0	0	0	0	0	0	0	0	0	0	0	0	0	0	0	0	0	0	0	0	0	0	0	0	0	0	0	0	0	0	0	0	0	0
Rosales	Moraceae	Milicia excelsa	(Welw.) C.C. Berg	1	Not assessed	0	0	0	0	0	0	0	0	0	0	0	0	0	0	0	0	0	1	1	1	1	0	0	0	0	0	0	0	0	0	0	0	0	0	0	0	0	0	0	0	0	0	0	0
Fabales	Fabaceae	Millettia brandisiana	Kurz	1	Not assessed	0	0	0	0	0	0	0	0	0	0	0	0	0	0	0	0	0	0	0	0	0	0	0	0	0	1	0	0	0	0	0	0	0	0	0	0	0	0	0	0	0	0	0	0
Fabales	Fabaceae	Millettia dura	Dunn	3	Not assessed	0	0	1	0	0	0	0	0	0	0	0	0	0	0	0	0	0	0	0	1	1	0	0	0	0	0	0	0	0	0	0	0	0	0	0	0	0	0	0	0	0	0	0	0
Fabales	Fabaceae	Millettia grandis	(E.Mey.) Skeels	15	Least concern	0	0	0	0	0	0	0	0	0	0	0	0	0	0	0	0	0	0	0	0	0	1	0	0	0	0	0	0	0	0	0	0	0	0	0	0	0	0	0	0	0	0	0	0
Fabales	Fabaceae	Millettia stuhlmannii	Taub.	2	Not assessed	0	0	0	0	0	0	0	0	0	0	0	0	0	0	0	0	0	0	0	0	1	0	0	0	0	0	0	0	0	0	0	0	0	0	0	0	0	0	0	0	0	0	0	0
Fabales	Fabaceae	Millettia sutherlandii	Harv.	1	Not assessed	0	0	0	0	0	0	0	0	0	0	0	0	0	0	0	0	0	0	0	0	1	0	0	0	0	0	0	0	0	0	0	0	0	0	0	0	0	0	0	0	0	0	0	0
Fabales	Fabaceae	Millettia usaramensis	Taub.	1	Not assessed	0	0	0	0	0	0	0	0	0	0	0	0	0	0	0	0	0	0	0	0	1	0	0	0	0	0	0	0	0	0	0	0	0	0	0	0	0	0	0	0	0	0	0	0
Proteales	Proteaceae	Mimetes capitulatus	R.Br.	1	Not assessed	0	0	0	0	0	0	0	0	0	0	0	0	0	0	0	0	0	0	0	0	0	0	0	0	0	0	0	0	0	0	0	0	0	0	0	0	0	0	1	0	0	0	0	0
Proteales	Proteaceae	Mimetes chrysanthus	Rourke	1	Vulnerable	0	0	0	0	0	0	0	0	0	0	0	0	0	0	0	0	0	0	0	0	0	0	0	0	0	0	0	0	0	0	0	0	0	0	0	0	0	0	1	0	0	0	0	0
Proteales	Proteaceae	Mimetes cucullatus	(L.) R.Br.	3	Not assessed	0	0	0	0	0	0	0	0	0	0	0	0	0	0	0	0	0	0	0	0	0	1	0	0	0	0	0	0	0	0	0	0	0	0	0	0	0	0	1	0	0	0	0	0
Proteales	Proteaceae	Mimetes fimbriifolius	Knight	2	Not assessed	0	0	0	0	0	0	0	0	0	0	0	0	0	0	0	0	0	0	0	0	0	0	0	0	0	0	0	0	0	0	0	0	0	0	0	0	0	0	1	0	0	0	0	0
Proteales	Proteaceae	Mimetes hirtus	(L.) Knight	1	Not assessed	0	0	0	0	0	0	0	0	0	0	0	0	0	0	0	0	0	0	0	0	0	0	0	0	0	0	0	0	0	0	0	0	0	0	0	0	0	0	1	0	0	0	0	0
Proteales	Proteaceae	Mimetes hottentoticus	E.Phillips & Hutch.	1	Not assessed	0	0	0	0	0	0	0	0	0	0	0	0	0	0	0	0	0	0	0	0	0	0	0	0	0	0	0	0	0	0	0	0	0	0	0	0	0	0	1	0	0	0	0	0
Proteales	Proteaceae	Mimetes stokoei	E.Phillips & Hutch.	1	Not assessed	0	0	0	0	0	0	0	0	0	0	0	0	0	0	0	0	0	0	0	0	0	0	0	0	0	0	0	0	0	0	0	0	0	0	0	0	0	0	1	0	0	0	0	0
Fabales	Fabaceae	Mimosa polycarpa var. spegazzinii	(Pirotta) Burkart	1	Not assessed	0	0	0	0	0	0	0	0	0	0	0	0	0	0	0	0	0	0	0	0	0	0	0	0	0	0	0	0	0	0	0	0	0	0	1	0	1	0	0	0	0	0	0	0
Ericales	Sapotaceae	Mimusops caffra	E.Mey ex A.DC.	4	Not assessed	0	0	0	0	0	0	0	0	0	0	0	0	0	0	0	0	0	0	0	0	0	1	0	0	0	0	0	0	0	0	0	0	0	0	0	0	0	0	0	0	0	0	0	0
Ericales	Sapotaceae	Mimusops commersonii	(G.Don) Engl.	1	Not assessed	0	0	0	0	0	0	0	0	0	0	0	0	0	0	0	0	0	0	0	0	0	0	1	0	0	0	0	0	0	0	0	0	0	0	0	0	0	0	0	0	0	0	0	0
Ericales	Sapotaceae	Mimusops obovata	Sond.	7	Not assessed	0	0	0	0	0	0	0	0	0	0	0	0	0	0	0	0	0	0	0	0	0	1	0	0	0	0	0	0	0	0	0	0	0	0	0	0	0	0	0	0	0	0	0	0
Ericales	Sapotaceae	Mimusops zeyheri	Sond.	5	Not assessed	0	0	0	0	0	0	0	0	0	0	0	0	0	0	0	0	0	0	0	1	1	1	0	0	0	0	0	0	0	0	0	0	0	0	0	0	0	0	0	0	0	0	0	0
Gentianales	Rubiaceae	Mitriostigma axillare	Hochst.	2	Not assessed	0	0	0	0	0	0	0	0	0	0	0	0	0	0	0	0	0	0	0	0	0	1	0	0	0	0	0	0	0	0	0	0	0	0	0	0	0	0	0	0	0	0	0	0
Magnoliales	Annonaceae	Monanthotaxis caffra	(Sond.) Verdc.	3	Not assessed	0	0	0	0	0	0	0	0	0	0	0	0	0	0	0	0	0	0	0	0	0	1	0	0	0	0	0	0	0	0	0	0	0	0	0	0	0	0	0	0	0	0	0	0
Gentianales	Apocynaceae	Mondia whitei	(Hook.f.) Skeels	2	Not assessed	0	0	0	0	0	0	0	0	0	0	0	0	0	0	0	0	0	1	0	1	1	1	0	0	0	0	0	0	0	0	0	0	0	0	0	0	0	0	0	0	0	0	0	0
Magnoliales	Annonaceae	Monodora junodii	Engl. & Diels	2	Not assessed	0	0	0	0	0	0	0	0	0	0	0	0	0	0	0	0	0	0	0	0	1	1	0	0	0	0	0	0	0	0	0	0	0	0	0	0	0	0	0	0	0	0	0	0
Fagales	Myricaceae	Morella integra	(A.Chev.) Killick	1	Not assessed	0	0	0	0	0	0	0	0	0	0	0	0	0	0	0	0	0	0	0	0	0	1	0	0	0	0	0	0	0	0	0	0	0	0	0	0	0	0	0	0	0	0	0	0
Fagales	Myricaceae	Morella pilulifera	(Rendle) Killick	1	Least concern	0	0	0	0	0	0	0	0	0	0	0	0	0	0	0	0	0	0	0	0	1	1	0	0	0	0	0	0	0	0	0	0	0	0	0	0	0	0	0	0	0	0	0	0
Fagales	Myricaceae	Morella serrata	(Lam.) Killick	2	Not assessed	0	0	0	0	0	0	0	0	0	0	0	0	0	0	0	0	0	0	0	0	1	1	0	0	0	0	0	0	0	0	0	0	0	0	0	0	0	0	0	0	0	0	0	0
Gentianales	Rubiaceae	Morinda citrifolia	L.	1	Not assessed	0	0	1	0	0	0	0	0	0	1	0	0	0	0	0	0	0	0	0	0	0	0	0	0	1	1	1	0	0	0	0	0	0	0	0	0	0	0	0	1	0	0	0	0
Brassicales	Moringaceae	Moringa drouhardii	Jum.	1	Least concern	0	0	0	0	0	0	0	0	0	0	0	0	0	0	0	0	0	0	0	0	0	0	1	0	0	0	0	0	0	0	0	0	0	0	0	0	0	0	0	0	0	0	0	0
Brassicales	Moringaceae	Moringa hildebrandtii	Engl.	1	Critically endangered	0	0	0	0	0	0	0	0	0	0	0	0	0	0	0	0	0	0	0	0	0	0	1	0	0	0	0	0	0	0	0	0	0	0	0	0	0	0	0	0	0	0	0	0
Brassicales	Moringaceae	Moringa oleifera	Lam.	2	Least concern	1	0	0	0	0	0	0	0	0	0	0	0	0	0	0	0	0	0	0	0	0	0	0	0	1	0	0	0	0	0	0	0	0	0	0	0	0	0	0	0	0	0	0	0
Brassicales	Moringaceae	Moringa ovalifolia	Dinter & A.Berger	3	Not assessed	0	0	0	0	0	0	0	0	0	0	0	0	0	0	0	0	0	0	0	0	0	1	0	0	0	0	0	0	0	0	0	0	0	0	0	0	0	0	0	0	0	0	0	0
Rosales	Moraceae	Morus alba	L.	5	Least concern	1	1	1	1	1	0	0	0	0	1	0	0	0	0	0	0	0	0	0	0	0	0	0	0	0	0	0	0	0	0	0	0	0	0	0	0	0	0	0	0	0	0	0	0
Rosales	Moraceae	Morus alba cv. 'Pendula'	L.	1	NA	0	0	0	0	0	0	0	0	0	0	0	0	0	0	0	0	0	0	0	0	0	0	0	0	0	0	0	0	0	0	0	0	0	0	0	0	0	0	0	0	0	0	0	0
Rosales	Moraceae	Morus mesozygia	Stapf	1	Not assessed	0	0	0	0	0	0	0	0	0	0	0	0	0	0	0	0	0	1	0	1	1	1	0	0	0	0	0	0	0	0	0	0	0	0	0	0	0	0	0	0	0	0	0	0
Rosales	Moraceae	Morus nigra	L.	3	Not assessed	0	0	0	0	1	0	0	0	0	0	1	0	0	0	0	0	0	0	0	0	0	0	0	0	0	0	0	0	0	0	0	0	0	0	0	0	0	0	0	0	0	0	0	0
Fabales	Fabaceae	Moullava spicata	(Dalzell) Nicolson	1	Not assessed	0	0	0	0	0	0	0	0	0	0	0	0	0	0	0	0	0	0	0	0	0	0	0	0	1	0	0	0	0	0	0	0	0	0	0	0	0	0	0	0	0	0	0	0
Fabales	Fabaceae	Mundulea sericea	(Willd.) A.Chev.	7	Least concern	0	0	0	0	0	0	0	0	0	0	0	0	0	0	0	0	0	0	0	0	1	1	1	0	1	0	0	0	0	0	0	0	0	0	0	0	0	0	0	0	0	0	0	0
Sapindales	Rutaceae	Murraya koenigii	(L.) Spreng.	1	Not assessed	0	0	0	0	0	0	0	0	0	1	0	0	0	0	0	0	0	0	0	0	0	0	0	0	1	1	0	0	0	0	0	0	0	0	0	0	0	0	0	0	0	0	0	0
Sapindales	Rutaceae	Murraya paniculata	(L.) Jack	5	Not assessed	0	0	1	0	0	0	0	0	0	0	0	0	0	0	0	0	0	0	0	0	0	0	0	0	0	0	1	0	1	0	0	0	0	0	0	0	0	0	0	1	0	0	0	0
Rosales	Urticaceae	Musanga cecropioides	R.Br. ex Tedlie	1	Not assessed	0	0	0	0	0	0	0	0	0	0	0	0	0	0	0	0	0	1	0	1	1	0	0	0	0	0	0	0	0	0	0	0	0	0	0	0	0	0	0	0	0	0	0	0
Gentianales	Rubiaceae	Mussaenda erythrophylla	Schum. & Thonn.	3	Least concern	0	0	0	0	0	0	0	0	0	0	0	0	0	0	0	0	0	0	0	1	0	0	0	0	0	0	0	0	0	0	0	0	0	0	0	0	0	0	0	0	0	0	0	0
Lamiales	Scrophulariaceae	Myoporum laetum	G.Forst.	4	Not assessed	1	0	1	0	0	0	0	0	0	0	0	0	0	0	0	0	0	0	0	0	0	0	0	0	0	0	0	0	0	0	0	0	0	0	0	0	0	0	0	0	0	0	1	0
Lamiales	Scrophulariaceae	Myoporum tetrandrum	(Labill.) Domin	3	Not assessed	0	0	0	0	0	0	0	0	0	0	0	0	0	0	0	0	0	0	0	0	0	0	0	0	0	0	0	0	0	0	0	0	0	0	0	0	0	0	0	0	1	0	0	0
Fagales	Myricaceae	Myrica cordifolia	(L.) Killick	1	Not assessed	0	0	0	0	0	0	0	0	0	0	0	0	0	0	0	0	0	0	0	0	0	1	0	0	0	0	0	0	0	0	0	0	0	0	0	0	0	0	1	0	0	0	0	0
Magnoliales	Myristicaceae	Myristica fragrans	Houtt.	1	Data deficient	0	0	0	0	0	0	0	0	0	0	0	0	0	0	0	0	0	0	0	0	0	0	0	0	0	1	1	0	0	0	0	0	0	0	0	0	0	0	0	0	0	0	0	0
Gunnerales	Myrothamnaceae	Myrothamnus flabellifolius	Welw.	1	Not assessed	0	0	0	0	0	0	0	0	0	0	0	0	0	0	0	0	0	0	0	1	1	1	0	0	0	0	0	0	0	0	0	0	0	0	0	0	0	0	0	0	0	0	0	0
Fabales	Fabaceae	Myroxylon balsamum	(L.) Harms	1	Not assessed	0	0	1	0	0	0	0	0	0	0	0	0	0	0	0	0	0	0	0	0	0	0	0	0	0	0	0	0	0	0	0	1	1	1	0	0	0	0	0	0	0	0	0	0
Ericales	Primulaceae	Myrsine africana	L.	7	Not assessed	0	0	0	0	0	0	0	0	0	1	0	0	1	0	0	0	1	0	1	0	1	1	0	0	1	0	0	0	0	0	0	0	0	0	0	0	0	0	0	0	0	0	0	0
Ericales	Primulaceae	Myrsine pillansii	Adamson	2	Not assessed	0	0	0	0	0	0	0	0	0	0	0	0	0	0	0	0	0	0	0	0	0	1	0	0	0	0	0	0	0	0	0	0	0	0	0	0	0	0	0	0	0	0	0	0
Myrtales	Myrtaceae	Myrtus communis	L.	7	Least concern	0	0	0	0	0	0	0	1	0	0	0	1	0	0	0	0	0	0	0	0	0	0	0	0	0	0	0	0	0	0	0	0	0	0	0	0	0	0	0	0	0	0	0	0
Myrtales	Myrtaceae	Myrtus communis cv. 'Variegata'	L.	1	NA	0	0	0	0	0	0	0	0	0	0	0	0	0	0	0	0	0	0	0	0	0	0	0	0	0	0	0	0	0	0	0	0	0	0	0	0	0	0	0	0	0	0	0	0
Celastrales	Celastraceae	Mystroxylon aethiopicum	(Thunb.) Loes.	5	Least concern	0	0	0	0	0	0	0	0	0	0	0	0	0	0	0	0	0	1	1	1	1	1	1	0	0	0	0	0	0	0	0	0	0	0	0	0	0	0	0	0	0	0	0	0
Celastrales	Celastraceae	Mystroxylon aethiopicum subsp. burkeanum	(Sond.) R.H.Archer	1	Not assessed	0	0	0	0	0	0	0	0	0	0	0	0	0	0	0	0	0	0	0	0	0	1	0	0	0	0	0	0	0	0	0	0	0	0	0	0	0	0	0	0	0	0	0	0
Podocarpales	Podocarpaceae	Nageia formosensis	(Dummer) C.N. Page	1	Near threatened	0	0	0	0	0	0	0	0	0	1	0	0	0	0	0	0	0	0	0	0	0	0	0	0	0	0	0	0	0	0	0	0	0	0	0	0	0	0	0	0	0	0	0	0
Ranunculales	Berberidaceae	Nandina domestica	Thunb.	10	Not assessed	1	1	1	0	0	0	0	0	0	1	0	0	0	0	0	0	0	0	0	0	0	0	0	0	0	0	0	0	0	0	0	0	0	0	0	0	0	0	0	0	0	0	0	0
Ranunculales	Berberidaceae	Nandina domestica cv. 'Pygmaea'	Thunb.	1	NA	0	0	0	0	0	0	0	0	0	0	0	0	0	0	0	0	0	0	0	0	0	0	0	0	0	0	0	0	0	0	0	0	0	0	0	0	0	0	0	0	0	0	0	0
Malpighiales	Erythroxylaceae	Nectaropetalum capense	(Bolus) Stapf & Boodle	2	Not assessed	0	0	0	0	0	0	0	0	0	0	0	0	0	0	0	0	0	0	0	0	0	1	0	0	0	0	0	0	0	0	0	0	0	0	0	0	0	0	0	0	0	0	0	0
Malpighiales	Erythroxylaceae	Nectaropetalum zuluense	(Schönland) Corbishley	3	Not assessed	0	0	0	0	0	0	0	0	0	0	0	0	0	0	0	0	0	0	0	0	0	1	0	0	0	0	0	0	0	0	0	0	0	0	0	0	0	0	0	0	0	0	0	0
Apiales	Araliaceae	Neocussonia umbellifera	(Sond.) Hutch.	8	Not assessed	0	0	0	0	0	0	0	0	0	0	0	0	0	0	0	0	0	0	0	0	0	1	0	0	0	0	0	0	0	0	0	0	0	0	0	0	0	0	0	0	0	0	0	0
Sapindales	Sapindaceae	Nephelium lappaceum	L.	1	Least concern	0	0	0	0	0	0	0	0	0	0	0	0	0	0	0	0	0	0	0	0	0	0	0	0	0	1	1	0	0	0	0	0	0	0	0	0	0	0	0	0	0	0	0	0
Gentianales	Apocynaceae	Nerium oleander	L.	7	Least concern	1	0	1	0	0	0	0	0	0	0	1	1	0	0	0	0	1	0	0	0	0	0	0	0	0	0	0	0	0	0	0	0	0	0	0	0	0	0	0	0	0	0	0	0
Gentianales	Apocynaceae	Nerium oleander cv. 'Fiesta Pienk'	L.	1	NA	0	0	0	0	0	0	0	0	0	0	0	0	0	0	0	0	0	0	0	0	0	0	0	0	0	0	0	0	0	0	0	0	0	0	0	0	0	0	0	0	0	0	0	0
Fabales	Fabaceae	Newtonia buchananii	(Baker f.) G.C.C. Glibert& Boutique	1	Least concern	0	0	0	0	0	0	0	0	0	0	0	0	0	0	0	0	0	0	0	1	1	0	0	0	0	0	0	0	0	0	0	0	0	0	0	0	0	0	0	0	0	0	0	0
Fabales	Fabaceae	Newtonia hildebrantii	(Vatke) Torre	2	Not assessed	0	0	0	0	0	0	0	0	0	0	0	0	0	0	0	0	0	0	0	0	1	1	0	0	0	0	0	0	0	0	0	0	0	0	0	0	0	0	0	0	0	0	0	0
Rosales	Rhamnaceae	Noltea africana	(L.) Rchb. f.	5	Not assessed	0	0	0	0	0	0	0	0	0	0	0	0	0	0	0	0	0	0	0	0	0	1	0	0	0	0	0	0	0	0	0	0	0	0	0	0	0	0	0	0	0	0	0	0
Lamiales	Oleaceae	Noronhia battiscombei	Hong-Wa & Besnard	1	Not assessed	0	0	0	0	0	0	0	0	0	0	0	0	0	0	0	0	0	0	0	0	1	1	0	0	0	0	0	0	0	0	0	0	0	0	0	0	0	0	0	0	0	0	0	0
Lamiales	Oleaceae	Noronhia emarginata	(Lam.) Poir.	1	Least concern	0	0	1	0	0	0	0	0	0	0	0	0	0	0	0	0	0	0	0	0	0	0	1	0	0	0	0	0	0	0	0	0	0	0	0	0	0	0	0	0	0	0	0	0
Lamiales	Oleaceae	Noronhia foveolata	(E.Mey) Hong-Wa & Besnard	7	Not assessed	0	0	0	0	0	0	0	0	0	0	0	0	0	0	0	0	0	0	0	0	0	1	0	0	0	0	0	0	0	0	0	0	0	0	0	0	0	0	0	0	0	0	0	0
Lamiales	Oleaceae	Noronhia foveolata subsp. major	(I. Verd.) Hong-Wa & Besnard	3	Not assessed	0	0	0	0	0	0	0	0	0	0	0	0	0	0	0	0	0	0	0	0	0	1	0	0	0	0	0	0	0	0	0	0	0	0	0	0	0	0	0	0	0	0	0	0
Lamiales	Oleaceae	Noronhia foveolata subsp. tomentella	(I. Verd.) Hong-Wa & Besnard	1	Not assessed	0	0	0	0	0	0	0	0	0	0	0	0	0	0	0	0	0	0	0	0	0	1	0	0	0	0	0	0	0	0	0	0	0	0	0	0	0	0	0	0	0	0	0	0
Lamiales	Oleaceae	Noronhia peglerae	(C.H.Wright) Hong-Wa & Besnard	5	Not assessed	0	0	0	0	0	0	0	0	0	0	0	0	0	0	0	0	0	0	0	0	0	1	0	0	0	0	0	0	0	0	0	0	0	0	0	0	0	0	0	0	0	0	0	0
Fagales	Nothofagaceae	Nothofagus alpina	(Poepp. & Endl.) Oerst.	1	Least concern	0	0	0	0	0	0	0	0	0	0	0	0	0	0	0	0	0	0	0	0	0	0	0	0	0	0	0	0	0	0	0	0	0	0	0	1	0	0	0	0	0	0	0	0
Fagales	Nothofagaceae	Nothofagus cunninghamii	(Hook.) Oerst.	1	Vulnerable	0	0	0	0	0	0	0	0	0	0	0	0	0	0	0	0	0	0	0	0	0	0	0	0	0	0	0	0	0	0	0	0	0	0	0	0	0	0	0	1	0	0	0	0
Fagales	Nothofagaceae	Nothofagus moorei	(F.Muell.) Krasser	2	Vulnerable	0	0	0	0	0	0	0	0	0	0	0	0	0	0	0	0	0	0	0	0	0	0	0	0	0	0	0	0	0	0	0	0	0	0	0	0	0	0	0	1	0	0	0	0
Fagales	Nothofagaceae	Nothofagus obliqua	(Mirb.) Oerst.	1	Least concern	0	0	0	0	0	0	0	0	0	0	0	0	0	0	0	0	0	0	0	0	0	0	0	0	0	0	0	0	0	0	0	0	0	0	0	1	0	0	0	0	0	0	0	0
Apiales	Apiaceae	Notobubon galbanum	(L.) Magee	1	Not assessed	0	0	0	0	0	0	0	0	0	0	0	0	0	0	0	0	0	0	0	0	0	0	0	0	0	0	0	0	0	0	0	0	0	0	0	0	0	0	1	0	0	0	0	0
Gentianales	Loganiaceae	Nuxia congesta	R.Br. ex Fresen.	8	Least concern	0	0	0	0	0	0	0	0	0	0	0	0	0	0	0	0	0	0	1	1	1	1	0	0	0	0	0	0	0	0	0	0	0	0	0	0	0	0	0	0	0	0	0	0
Gentianales	Loganiaceae	Nuxia floribunda	Benth.	22	Least concern	0	0	0	0	1	0	0	0	0	0	0	0	0	0	0	0	0	0	0	0	1	1	0	0	0	0	0	0	0	0	0	0	0	0	0	0	0	0	0	0	0	0	0	0
Gentianales	Loganiaceae	Nuxia gracilis	Engl.	2	Not assessed	0	0	0	0	0	0	0	0	0	0	0	0	0	0	0	0	0	0	0	0	0	1	0	0	0	0	0	0	0	0	0	0	0	0	0	0	0	0	0	0	0	0	0	0
Gentianales	Loganiaceae	Nuxia oppositifolia	(Hochst.) Benth.	1	Least concern	0	0	0	0	0	0	0	0	0	0	0	0	0	0	0	0	0	0	0	0	0	1	0	0	0	0	0	0	0	0	0	0	0	0	0	0	0	0	0	0	0	0	0	0
Sapindales	Meliaceae	Nymania capensis	(Thunb.) Lindb.	3	Not assessed	0	0	0	0	0	0	0	0	0	0	0	0	0	0	0	0	0	0	0	0	0	1	0	0	0	0	0	0	0	0	0	0	0	0	0	0	0	0	0	0	0	0	0	0
Cornales	Nyssaceae	Nyssa sylvatica	Marshall	1	Not assessed	0	0	0	0	0	0	0	0	0	0	0	0	0	1	1	0	0	0	0	0	0	0	0	0	0	0	0	0	0	0	0	0	0	0	0	0	0	0	0	0	0	0	0	0
Rosales	Urticaceae	Obetia carruthersiana	(Hiern) Rendle	1	Not assessed	0	0	0	0	0	0	0	0	0	0	0	0	0	0	0	0	0	0	0	0	0	1	0	0	0	0	0	0	0	0	0	0	0	0	0	0	0	0	0	0	0	0	0	0
Rosales	Urticaceae	Obetia tenax	(N.E.Br.) Friis	1	Least concern	0	0	0	0	0	0	0	0	0	0	0	0	0	0	0	0	0	0	0	0	1	1	0	0	0	0	0	0	0	0	0	0	0	0	0	0	0	0	0	0	0	0	0	0
Malpighiales	Ochnaceae	Ochna arborea	Burch. ex DC.	4	Least concern	0	0	0	0	0	0	0	0	0	0	0	0	0	0	0	0	0	0	0	0	0	1	0	0	0	0	0	0	0	0	0	0	0	0	0	0	0	0	0	0	0	0	0	0
Malpighiales	Ochnaceae	Ochna arborea var. oconnorii	(E.Phillips) Du Toit	2	Not assessed	0	0	0	0	0	0	0	0	0	0	0	0	0	0	0	0	0	0	0	0	0	1	0	0	0	0	0	0	0	0	0	0	0	0	0	0	0	0	0	0	0	0	0	0
Malpighiales	Ochnaceae	Ochna gamostigmata	Du Toit	1	Not assessed	0	0	0	0	0	0	0	0	0	0	0	0	0	0	0	0	0	0	0	0	0	1	0	0	0	0	0	0	0	0	0	0	0	0	0	0	0	0	0	0	0	0	0	0
Malpighiales	Ochnaceae	Ochna holstii	Engl.	2	Least concern	0	0	0	0	0	0	0	0	0	0	0	0	0	0	0	0	0	0	0	0	1	1	0	0	0	0	0	0	0	0	0	0	0	0	0	0	0	0	0	0	0	0	0	0
Malpighiales	Ochnaceae	Ochna natalitia	(Meisn.) Walp.	5	Not assessed	0	0	0	0	0	0	0	0	0	0	0	0	0	0	0	0	0	0	0	0	0	1	0	0	0	0	0	0	0	0	0	0	0	0	0	0	0	0	0	0	0	0	0	0
Malpighiales	Ochnaceae	Ochna pretoriensis	Phillips	4	Not assessed	0	0	0	0	0	0	0	0	0	0	0	0	0	0	0	0	0	0	0	0	0	1	0	0	0	0	0	0	0	0	0	0	0	0	0	0	0	0	0	0	0	0	0	0
Malpighiales	Ochnaceae	Ochna pulchra	Hook.	2	Least concern	0	0	0	0	0	0	0	0	0	0	0	0	0	0	0	0	0	0	0	1	1	1	0	0	0	0	0	0	0	0	0	0	0	0	0	0	0	0	0	0	0	0	0	0
Malpighiales	Ochnaceae	Ochna serrulata	Walp.	9	Not assessed	0	0	1	0	0	0	0	0	0	0	0	0	0	0	0	0	0	0	0	0	0	1	0	0	0	0	0	0	0	0	0	0	0	0	0	0	0	0	0	0	0	0	0	0
Malvales	Malvaceae	Ochroma pyramidale	(Cav. ex Lam.) Urb.	1	Least concern	0	0	1	0	0	0	0	0	0	0	0	0	0	0	0	0	0	0	0	0	0	0	0	0	0	0	0	0	0	0	0	1	1	1	0	0	0	0	0	0	0	0	0	0
Gentianales	Apocynaceae	Ochrosia oppositifolia	(Lam.) K.Schum.	1	Not assessed	0	0	0	0	0	0	0	0	0	0	0	0	0	0	0	0	0	0	0	0	0	0	0	0	1	1	1	0	1	1	1	0	0	0	0	0	0	0	0	0	0	0	0	0
Laurales	Lauraceae	Ocotea bullata	(Burch) E.Mey.	7	Not assessed	0	0	0	0	0	0	0	0	0	0	0	0	0	0	0	0	0	0	0	0	0	1	0	0	0	0	0	0	0	0	0	0	0	0	0	0	0	0	0	0	0	0	0	0
Laurales	Lauraceae	Ocotea foetens	(Aiton) Baill.	1	Least concern	0	0	0	0	0	0	0	0	0	0	0	0	1	0	0	0	0	0	0	0	0	0	0	0	0	0	0	0	0	0	0	0	0	0	0	0	0	0	0	0	0	0	0	0
Laurales	Lauraceae	Ocotea porosa	(Nees & Mart.) Barroso	2	Vulnerable	0	0	0	0	0	0	0	0	0	0	0	0	0	0	0	0	0	0	0	0	0	0	0	0	0	0	0	0	0	0	0	0	0	0	1	0	0	0	0	0	0	0	0	0
Santalales	Olacaceae	Olax dissitiflora	Oliv.	1	Least concern	0	0	0	0	0	0	0	0	0	0	0	0	0	0	0	0	0	0	0	0	1	1	0	0	0	0	0	0	0	0	0	0	0	0	0	0	0	0	0	0	0	0	0	0
Asterales	Asteraceae	Oldenburgia grandis	Baill.	2	Near threatened	0	0	0	0	0	0	0	0	0	0	0	0	0	0	0	0	0	0	0	0	0	1	0	0	0	0	0	0	0	0	0	0	0	0	0	0	0	0	0	0	0	0	0	0
Lamiales	Oleaceae	Olea africana	L.	3	Not assessed	0	0	0	0	0	0	0	0	0	0	0	0	0	0	0	0	0	0	0	1	1	1	1	0	0	0	0	0	0	0	0	0	0	0	0	0	0	0	0	0	0	0	0	0
Lamiales	Oleaceae	Olea capensis	L.	7	Not assessed	0	0	0	0	0	0	0	0	0	0	0	0	0	0	0	0	0	0	0	1	1	1	1	0	0	0	0	0	0	0	0	0	0	0	0	0	0	0	0	0	0	0	0	0
Lamiales	Oleaceae	Olea capensis subsp. macrocarpa	(C.H. Wright) I.Verd.	6	Not assessed	0	0	0	0	0	0	0	0	0	0	0	0	0	0	0	0	0	0	0	1	1	1	1	0	0	0	0	0	0	0	0	0	0	0	0	0	0	0	0	0	0	0	0	0
Lamiales	Oleaceae	Olea europaea	L.	6	Data deficient	0	1	1	1	1	0	0	0	0	0	1	1	0	0	0	0	0	0	1	1	1	1	1	0	1	0	0	0	0	0	0	0	0	0	0	0	0	0	0	0	0	0	0	0
Lamiales	Oleaceae	Olea europaea subsp. cuspidata	(Wall. ex G.Don) Cif.	32	Not assessed	0	0	0	1	1	0	0	0	0	0	1	1	0	0	0	0	0	0	1	1	1	1	1	0	1	0	0	0	0	0	0	0	0	0	0	0	0	0	0	0	0	0	0	0
Lamiales	Oleaceae	Olea exasperata	Jacq.	3	Least concern	0	0	0	0	0	0	0	0	0	0	0	0	0	0	0	0	0	0	0	0	0	0	0	0	0	0	0	0	0	0	0	0	0	0	0	0	0	0	1	0	0	0	0	0
Lamiales	Oleaceae	Olea woodiana	Knobl.	5	Not assessed	0	0	0	0	0	0	0	0	0	0	0	0	0	0	0	0	0	0	0	0	1	1	0	0	0	0	0	0	0	0	0	0	0	0	0	0	0	0	0	0	0	0	0	0
Myrtales	Penaeaceae	Olinia emarginata	Burtt Davy	3	Not assessed	0	0	0	0	0	0	0	0	0	0	0	0	0	0	0	0	0	0	0	0	0	1	0	0	0	0	0	0	0	0	0	0	0	0	0	0	0	0	0	0	0	0	0	0
Myrtales	Penaeaceae	Olinia ventosa	(L.) Cufod.	7	Least concern	0	0	0	0	1	0	0	0	0	0	0	0	0	0	0	0	0	0	0	0	0	1	0	0	0	0	0	0	0	0	0	0	0	0	0	0	0	0	0	0	0	0	0	0
Malpighiales	Salicaceae	Oncoba spinosa	Forssk.	7	Least concern	0	0	0	0	0	0	0	0	0	0	0	0	0	0	0	0	1	1	1	1	1	1	0	0	0	0	0	0	0	0	0	0	0	0	0	0	0	0	0	0	0	0	0	0
Sapindales	Anacardiaceae	Operculicarya decaryi	H.Perrier	1	Least concern	0	0	0	0	0	0	0	0	0	0	0	0	0	0	0	0	0	0	0	0	0	0	1	0	0	0	0	0	0	0	0	0	0	0	0	0	0	0	0	0	0	0	0	0
Sapindales	Rutaceae	Oricia bachmannii	(Engl.) I. Verd.	1	Least concern	0	0	0	0	0	0	0	0	0	0	0	0	0	0	0	0	0	0	0	0	1	1	0	0	0	0	0	0	0	0	0	0	0	0	0	0	0	0	0	0	0	0	0	0
Fabales	Fabaceae	Ormocarpum kirkii	S. Moore	1	Least concern	0	0	0	0	0	0	0	0	0	0	0	0	0	0	0	0	0	0	0	1	1	1	0	0	0	0	0	0	0	0	0	0	0	0	0	0	0	0	0	0	0	0	0	0
Fabales	Fabaceae	Ormocarpum trichocarpum	(Taub.) Engl.	3	Least concern	0	0	0	0	0	0	0	0	0	0	0	0	0	0	0	0	0	1	1	1	1	1	0	0	0	0	0	0	0	0	0	0	0	0	0	0	0	0	0	0	0	0	0	0
Lamiales	Oleaceae	Osmanthus fragrans	(Thunb.) Lour.	1	Least concern	0	0	0	0	1	0	0	0	0	1	0	0	0	0	0	0	0	0	0	0	0	0	0	0	0	0	0	0	0	0	0	0	0	0	0	0	0	0	0	0	0	0	0	0
Fagales	Betulaceae	Ostrya carpinifolia	Scop.	1	Least concern	0	0	0	0	0	0	0	1	0	0	0	1	0	0	0	0	0	0	0	0	0	0	0	0	0	0	0	0	0	0	0	0	0	0	0	0	0	0	0	0	0	0	0	0
Santalales	Santalaceae	Osyris compressa	(P.J.Bergius) A.DC.	1	Not assessed	0	0	0	0	0	0	0	0	0	0	0	0	0	0	0	0	0	0	0	0	0	1	0	0	0	0	0	0	0	0	0	0	0	0	0	0	0	0	1	0	0	0	0	0
Santalales	Santalaceae	Osyris quadripartita	Salzm. ex Decne.	1	Least concern	0	0	0	0	0	0	0	0	0	1	0	0	0	0	0	0	0	1	1	1	1	1	0	0	1	1	0	0	0	0	0	0	0	0	0	0	0	0	0	0	0	0	0	0
Gentianales	Rubiaceae	Oxyanthus latifolius	Sond.	1	Not assessed	0	0	0	0	0	0	0	0	0	0	0	0	0	0	0	0	0	0	0	0	0	1	0	0	0	0	0	0	0	0	0	0	0	0	0	0	0	0	0	0	0	0	0	0
Gentianales	Rubiaceae	Oxyanthus pyriformis	(Hochst.) Skeels	4	Not assessed	0	0	0	0	0	0	0	0	0	0	0	0	0	0	0	0	0	0	0	0	0	1	0	0	0	0	0	0	0	0	0	0	0	0	0	0	0	0	0	0	0	0	0	0
Gentianales	Rubiaceae	Oxyanthus speciosus	DC.	1	Least concern	0	0	0	0	0	0	0	0	0	0	0	0	0	0	0	0	0	0	0	1	1	0	0	0	0	0	0	0	0	0	0	0	0	0	0	0	0	0	0	0	0	0	0	0
Gentianales	Rubiaceae	Oxyanthus speciosus subsp. gerarrdii	(Sond.) Bridson	1	Not assessed	0	0	0	0	0	0	0	0	0	0	0	0	0	0	0	0	0	0	0	0	0	1	0	0	0	0	0	0	0	0	0	0	0	0	0	0	0	0	0	0	0	0	0	0
Sapindales	Anacardiaceae	Ozoroa engleri	R.Fern. & A.Fern.	1	Least concern	0	0	0	0	0	0	0	0	0	0	0	0	0	0	0	0	0	0	0	0	0	1	0	0	0	0	0	0	0	0	0	0	0	0	0	0	0	0	0	0	0	0	0	0
Sapindales	Anacardiaceae	Ozoroa insignis subsp. reticulata	(Baker f.) R. Fern. & A. Fern.	2	Not assessed	0	0	0	0	0	0	0	0	0	0	0	0	0	0	0	0	0	0	0	0	1	0	0	0	0	0	0	0	0	0	0	0	0	0	0	0	0	0	0	0	0	0	0	0
Sapindales	Anacardiaceae	Ozoroa obovata	(Oliv.) R.Fern. & A.Fern.	2	Not assessed	0	0	0	0	0	0	0	0	0	0	0	0	0	0	0	0	0	0	0	1	1	1	0	0	0	0	0	0	0	0	0	0	0	0	0	0	0	0	0	0	0	0	0	0
Sapindales	Anacardiaceae	Ozoroa paniculosa	(Sond.) R. Fern. & A. Fern.	1	Least concern	0	0	0	0	0	0	0	0	0	0	0	0	0	0	0	0	0	0	0	0	0	1	0	0	0	0	0	0	0	0	0	0	0	0	0	0	0	0	0	0	0	0	0	0
Malvales	Malvaceae	Pachira aquatica	Aubl.	1	Not assessed	0	0	0	0	0	0	0	0	0	0	0	0	0	0	0	0	0	0	0	0	0	0	0	0	0	0	0	0	0	0	0	1	1	1	0	0	0	0	0	0	0	0	0	0
Malvales	Malvaceae	Pachira insignis	(Sw.) Savigny	2	Not assessed	0	0	0	0	0	0	0	0	0	0	0	0	0	0	0	0	0	0	0	0	0	0	0	0	0	0	0	0	0	0	0	0	1	1	0	0	0	0	0	0	0	0	0	0
Gentianales	Apocynaceae	Pachypodium baronii	Costantin & Bios	1	Endangered	0	0	0	0	0	0	0	0	0	0	0	0	0	0	0	0	0	0	0	0	0	0	1	0	0	0	0	0	0	0	0	0	0	0	0	0	0	0	0	0	0	0	0	0
Gentianales	Apocynaceae	Pachypodium geayi	Costantin & Bois	3	Least concern	0	0	0	0	0	0	0	0	0	0	0	0	0	0	0	0	0	0	0	0	0	0	1	0	0	0	0	0	0	0	0	0	0	0	0	0	0	0	0	0	0	0	0	0
Gentianales	Apocynaceae	Pachypodium lamerei	Drake	2	Least concern	0	0	0	0	0	0	0	0	0	0	0	0	0	0	0	0	0	0	0	0	0	0	1	0	0	0	0	0	0	0	0	0	0	0	0	0	0	0	0	0	0	0	0	0
Gentianales	Apocynaceae	Pachypodium lealii	Welw.	1	Not assessed	0	0	0	0	0	0	0	0	0	0	0	0	0	0	0	0	0	0	0	0	0	1	0	0	0	0	0	0	0	0	0	0	0	0	0	0	0	0	0	0	0	0	0	0
Gentianales	Apocynaceae	Pachypodium namaquanum	Welw.	1	Near threatened	0	0	0	0	0	0	0	0	0	0	0	0	0	0	0	0	0	0	0	0	0	1	0	0	0	0	0	0	0	0	0	0	0	0	0	0	0	0	0	0	0	0	0	0
Gentianales	Apocynaceae	Pachypodium rutenbergianum	Vatke	2	Least concern	0	0	0	0	0	0	0	0	0	0	0	0	0	0	0	0	0	0	0	0	0	0	1	0	0	0	0	0	0	0	0	0	0	0	0	0	0	0	0	0	0	0	0	0
Gentianales	Apocynaceae	Pachypodium windsorii	Poiss.	1	Not assessed	0	0	0	0	0	0	0	0	0	0	0	0	0	0	0	0	0	0	0	0	0	0	1	0	0	0	0	0	0	0	0	0	0	0	0	0	0	0	0	0	0	0	0	0
Sapindales	Sapindaceae	Pancovia golungensis	(Hiern) Exell & Mendonça	2	Not assessed	0	0	0	0	0	0	0	0	0	0	0	0	0	0	0	0	0	0	0	0	1	1	0	0	0	0	0	0	0	0	0	0	0	0	0	0	0	0	0	0	0	0	0	0
Pandanales	Pandanaceae	Pandanus livingstonianus	Rendle	1	Not assessed	0	0	0	0	0	0	0	0	0	0	0	0	0	0	0	0	0	0	0	1	1	0	0	0	0	0	0	0	0	0	0	0	0	0	0	0	0	0	0	0	0	0	0	0
Pandanales	Pandanaceae	Pandanus odoratissimus	L.f.	1	Not assessed	0	0	0	0	0	0	0	0	0	0	0	0	0	0	0	0	0	0	0	0	0	0	0	0	1	1	1	0	0	1	0	0	0	0	0	0	0	0	0	0	0	0	0	0
Pandanales	Pandanaceae	Pandanus tectorius	Parkinson	1	Not assessed	0	0	0	0	0	0	0	0	0	0	0	0	0	0	0	0	0	0	0	0	0	0	0	0	0	0	1	0	0	1	1	0	0	0	0	0	0	0	0	0	0	0	0	0
Pandanales	Pandanaceae	Pandanus utilis	Bory	10	Not assessed	0	0	0	0	0	0	0	0	0	0	0	0	0	0	0	0	0	0	0	0	0	0	1	0	0	0	0	0	0	0	0	0	0	0	0	0	0	0	0	0	0	0	0	0
Lamiales	Bignoniaceae	Pandorea jasminoides	(Lindl.) K.Schum.	1	Not assessed	0	0	0	0	0	0	0	0	0	0	0	0	0	0	0	0	0	0	0	0	0	0	0	0	0	0	0	0	0	0	0	0	0	0	0	0	0	0	0	1	0	0	0	0
Sapindales	Sapindaceae	Pappea capensis	Eckl. & Zeyh.	9	Least concern	0	0	0	0	0	0	0	0	0	0	0	0	0	0	0	0	0	0	0	0	1	1	0	0	0	0	0	0	0	0	0	0	0	0	0	0	0	0	0	0	0	0	0	0
Malpighiales	Chrysobalanaceae	Parinari curatellifolia	Planch. ex Benth.	1	Least concern	0	0	0	0	0	0	0	0	0	0	0	0	0	0	0	0	0	1	1	1	1	1	0	0	0	0	0	0	0	0	0	0	0	0	0	0	0	0	0	0	0	0	0	0
Fabales	Fabaceae	Parkinsonia aculeata	L.	3	Not assessed	0	1	1	0	1	1	0	0	0	0	0	0	0	0	0	0	0	0	0	0	0	0	0	0	0	0	0	0	0	0	0	1	0	0	0	0	0	0	0	0	0	0	0	0
Fabales	Fabaceae	Parkinsonia africana	Sond.	1	Least concern	0	0	0	0	0	0	0	0	0	0	0	0	0	0	0	0	0	0	0	0	0	1	0	0	0	0	0	0	0	0	0	0	0	0	0	0	0	0	0	0	0	0	0	0
Lamiales	Bignoniaceae	Parmentiera cereifera	Seem.	1	Not assessed	0	0	0	0	0	0	0	0	0	0	0	0	0	0	0	0	0	0	0	0	0	0	0	0	0	0	0	0	0	0	0	1	0	0	0	0	0	0	0	0	0	0	0	0
Lamiales	Scrophulariaceae	Paulownia tomentosa	(Thunb.) Steud.	4	Not assessed	0	0	1	1	0	0	0	0	0	1	0	0	0	0	0	0	0	0	0	0	0	0	0	0	0	0	0	0	0	0	0	0	0	0	0	0	0	0	0	0	0	0	0	0
Gentianales	Rubiaceae	Pavetta bowkeri	Harv.	1	Not assessed	0	0	0	0	0	0	0	0	0	0	0	0	0	0	0	0	0	0	0	0	0	1	0	0	0	0	0	0	0	0	0	0	0	0	0	0	0	0	0	0	0	0	0	0
Gentianales	Rubiaceae	Pavetta edentula	Sond.	1	Least concern	0	0	0	0	0	0	0	0	0	0	0	0	0	0	0	0	0	0	0	0	0	1	0	0	0	0	0	0	0	0	0	0	0	0	0	0	0	0	0	0	0	0	0	0
Gentianales	Rubiaceae	Pavetta gardeniifolia	A.Rich.	1	Least concern	0	0	0	0	0	0	0	0	0	0	0	0	0	0	0	0	0	1	1	1	1	1	0	0	0	0	0	0	0	0	0	0	0	0	0	0	0	0	0	0	0	0	0	0
Gentianales	Rubiaceae	Pavetta lanceolata	Eckl.	7	Not assessed	0	0	0	0	0	0	0	0	0	0	0	0	0	0	0	0	0	0	0	0	0	1	0	0	0	0	0	0	0	0	0	0	0	0	0	0	0	0	0	0	0	0	0	0
Gentianales	Rubiaceae	Pavetta revoluta	Hochst.	4	Not assessed	0	0	0	0	0	0	0	0	0	0	0	0	0	0	0	0	0	0	0	0	0	1	0	0	0	0	0	0	0	0	0	0	0	0	0	0	0	0	0	0	0	0	0	0
Gentianales	Rubiaceae	Pavetta zeyheri	Sond.	2	Not assessed	0	0	0	0	0	0	0	0	0	0	0	0	0	0	0	0	0	0	0	0	0	1	0	0	0	0	0	0	0	0	0	0	0	0	0	0	0	0	0	0	0	0	0	0
Malvales	Malvaceae	Pavonia praemorsa	(L.f.) Cav.	2	Not assessed	0	0	0	0	0	0	0	0	0	0	0	0	0	0	0	0	0	0	0	0	0	1	0	0	0	0	0	0	0	0	0	0	0	0	0	0	0	0	0	0	0	0	0	0
Malvales	Thymelaeaceae	Peddiea africana	Harv.	3	Not assessed	0	0	0	0	0	0	0	0	0	0	0	0	0	0	0	0	0	0	0	0	1	1	0	0	0	0	0	0	0	0	0	0	0	0	0	0	0	0	0	0	0	0	0	0
Fabales	Fabaceae	Peltophorum africanum	Sond.	19	Least concern	0	0	0	0	0	0	0	0	0	0	0	0	0	0	0	0	0	0	0	0	1	1	0	0	0	0	0	0	0	0	0	0	0	0	0	0	0	0	0	0	0	0	0	0
Fabales	Fabaceae	Peltophorum dubium	(Spreng.) Taub.	1	Least concern	0	0	0	0	0	0	0	0	0	0	0	0	0	0	0	0	0	0	0	0	0	0	0	0	0	0	0	0	0	0	0	0	0	0	1	0	0	0	0	0	0	0	0	0
Fabales	Fabaceae	Peltophorum pterocarpum	(DC.) Backer ex K.Heyne	2	Not assessed	0	0	0	0	0	0	0	0	0	0	0	0	0	0	0	0	0	0	0	0	0	0	0	0	0	0	1	0	0	0	0	0	0	0	0	0	0	0	0	0	0	0	0	0
Caryophyllales	Cactaceae	Pereskia grandifolia	Haw.	4	Least concern	0	0	0	0	0	0	0	0	0	0	0	0	0	0	0	0	0	0	0	0	0	0	0	0	0	0	0	0	0	0	0	0	0	0	1	0	0	0	0	0	0	0	0	0
Laurales	Lauraceae	Persea americana	Mill.	6	Least concern	1	0	1	0	1	1	0	0	0	0	0	0	0	0	0	0	0	0	0	0	0	0	0	0	0	0	0	0	0	0	0	1	0	0	0	0	0	0	0	0	0	0	0	0
Lamiales	Verbenaceae	Petrea volubilis	L.	6	Not assessed	0	0	0	0	0	0	0	0	0	0	0	0	0	0	0	0	0	0	0	0	0	0	0	0	0	0	0	0	0	0	0	1	1	1	1	0	0	0	0	0	0	0	0	0
Fabales	Fabaceae	Philenoptera bussei	(Harms) Schrire	1	Not assessed	0	0	0	0	0	0	0	0	0	0	0	0	0	0	0	0	0	0	0	0	1	1	0	0	0	0	0	0	0	0	0	0	0	0	0	0	0	0	0	0	0	0	0	0
Fabales	Fabaceae	Philenoptera eriocalyx	(Harms) Schrire	1	Not assessed	0	0	0	0	0	0	0	0	0	0	0	0	0	0	0	0	0	1	0	0	1	0	0	0	0	0	0	0	0	0	0	0	0	0	0	0	0	0	0	0	0	0	0	0
Fabales	Fabaceae	Philenoptera sutherlandii	(Harv.) Schrire	3	Not assessed	0	0	0	0	0	0	0	0	0	0	0	0	0	0	0	0	0	0	0	0	0	1	0	0	0	0	0	0	0	0	0	0	0	0	0	0	0	0	0	0	0	0	0	0
Fabales	Fabaceae	Philenoptera violacea	(Klotzsch) Schrire	9	Least concern	0	0	0	0	0	0	0	0	0	0	0	0	0	0	0	0	0	0	0	1	1	1	0	0	0	0	0	0	0	0	0	0	0	0	0	0	0	0	0	0	0	0	0	0
Arecales	Arecaceae	Phoenix canariensis	Chabaud	24	Least concern	1	0	1	1	0	0	0	0	0	0	0	0	1	0	0	0	0	0	0	0	0	0	0	0	0	0	0	0	0	0	0	0	0	0	0	0	0	0	0	0	0	0	0	0
Arecales	Arecaceae	Phoenix dactylifera	L.	7	Not assessed	1	0	1	0	0	0	0	0	0	0	0	0	0	0	0	0	1	0	0	0	0	0	0	0	0	0	0	0	0	0	0	0	0	0	0	0	0	0	0	0	0	0	0	0
Arecales	Arecaceae	Phoenix loureiroi	Kunth	1	Least concern	0	0	0	0	0	0	0	0	0	1	0	0	0	0	0	0	0	0	0	0	0	0	0	0	1	1	1	0	0	0	0	0	0	0	0	0	0	0	0	0	0	0	0	0
Arecales	Arecaceae	Phoenix pusilla	Gaertn.	1	Not assessed	0	0	0	0	0	0	0	0	0	0	0	0	0	0	0	0	0	0	0	0	0	0	0	0	1	0	0	0	0	0	0	0	0	0	0	0	0	0	0	0	0	0	0	0
Arecales	Arecaceae	Phoenix reclinata	Jacq.	25	Least concern	0	0	0	0	0	0	0	0	0	0	0	0	0	0	0	0	0	0	0	0	0	1	0	0	0	0	0	0	0	0	0	0	0	0	0	0	0	0	0	0	0	0	0	0
Arecales	Arecaceae	Phoenix reclinata x canariensis	NA	1	NA	0	0	0	0	0	0	0	0	0	0	0	0	0	0	0	0	0	0	0	0	0	0	0	0	0	0	0	0	0	0	0	0	0	0	0	0	0	0	0	0	0	0	0	0
Arecales	Arecaceae	Phoenix roebelenii	O'Brien	5	Not assessed	0	0	0	0	0	0	0	0	0	0	0	0	0	0	0	0	0	0	0	0	0	0	0	0	0	1	0	0	0	0	0	0	0	0	0	0	0	0	0	0	0	0	0	0
Arecales	Arecaceae	Phoenix sylvestris	(L.) Roxb.	1	Not assessed	0	0	0	0	0	0	0	0	0	1	0	0	0	0	0	0	0	0	0	0	0	0	0	0	1	0	0	0	0	0	0	0	0	0	0	0	0	0	0	0	0	0	0	0
Rosales	Rosaceae	Photinia glabra	(Thunb.) Franch. & Sav.	2	Least concern	0	0	0	0	0	0	0	0	0	1	0	0	0	0	0	0	0	0	0	0	0	0	0	0	0	1	0	0	0	0	0	0	0	0	0	0	0	0	0	0	0	0	0	0
Rosales	Rosaceae	Photinia serratifolia	(Desf.) Kalkm.	1	Not assessed	0	0	1	0	0	0	0	0	0	1	0	0	0	0	0	0	0	0	0	0	0	0	0	0	0	1	1	0	0	0	0	0	0	0	0	0	0	0	0	0	0	0	0	0
Rosales	Rosaceae	Photinia villosa	(Thunb.) DC.	1	Least concern	0	0	0	0	0	0	0	0	0	1	0	0	0	0	0	0	0	0	0	0	0	0	0	0	0	1	0	0	0	0	0	0	0	0	0	0	0	0	0	0	0	0	0	0
Rosales	Rhamnaceae	Phylica buxifolia	L.	2	Not assessed	0	0	0	0	0	0	0	0	0	0	0	0	0	0	0	0	0	0	0	0	0	0	1	0	0	0	0	0	0	0	0	0	0	0	0	0	0	0	1	0	0	0	0	0
Malpighiales	Euphorbiaceae	Phyllanthus emblica	L.	3	Not assessed	0	0	0	0	0	0	0	0	0	0	0	0	0	0	0	0	0	0	0	0	0	0	0	0	1	1	1	0	0	0	0	0	0	0	0	0	0	0	0	0	0	0	0	0
Malpighiales	Phyllanthaceae	Phyllanthus polyspermus	Shumach.	2	Not assessed	0	0	0	0	0	0	0	0	0	0	0	0	0	0	0	0	0	0	0	1	1	1	0	0	0	0	0	0	0	0	0	0	0	0	0	0	0	0	0	0	0	0	0	0
Malpighiales	Phyllanthaceae	Phyllanthus reticulatus	Poir.	2	Least concern	0	0	0	0	0	0	0	0	0	0	0	0	0	0	0	0	0	0	0	0	0	0	0	0	0	0	1	0	0	0	0	0	0	0	0	0	0	0	0	1	0	0	0	0
Podocarpales	Podocarpaceae	Phyllocladus alpinus	Hook.f.	1	Not assessed	0	0	0	0	0	0	0	0	0	0	0	0	0	0	0	0	0	0	0	0	0	0	0	0	0	0	0	0	0	0	0	0	0	0	0	0	0	0	0	0	0	0	1	0
Podocarpales	Podocarpaceae	Phyllocladus trichomanoides	D.Don	1	Least concern	0	0	0	0	0	0	0	0	0	0	0	0	0	0	0	0	0	0	0	0	0	0	0	0	0	0	0	0	0	0	0	0	0	0	0	0	0	0	0	0	0	0	1	0
Caryophyllales	Phytolaccaceae	Phytolacca americana	L.	1	Not assessed	1	0	0	0	0	0	0	0	0	0	0	0	0	1	1	1	0	0	0	0	0	0	0	0	0	0	0	0	0	0	0	0	0	0	0	0	0	0	0	0	0	0	0	0
Caryophyllales	Phytolaccaceae	Phytolacca dioica	L.	8	Not assessed	1	0	1	0	0	0	0	0	0	0	0	0	0	0	0	0	0	0	0	0	0	0	0	0	0	0	0	0	0	0	0	0	0	0	1	1	1	0	0	0	0	0	0	0
Pinales	Pinaceae	Picea abies	(L.) H. Karst.	2	Least concern	0	0	1	0	0	0	0	1	0	0	0	0	0	0	0	0	0	0	0	0	0	0	0	0	0	0	0	0	0	0	0	0	0	0	0	0	0	0	0	0	0	0	0	0
Pinales	Pinaceae	Picea smithiana	(Wall.) Boiss.	2	Least concern	0	0	0	0	0	0	0	0	0	1	0	0	0	0	0	0	0	0	0	0	0	0	0	0	0	0	0	0	0	0	0	0	0	0	0	0	0	0	0	0	0	0	0	0
Sapindales	Simaroubaceae	Picrasma excelsa	(Sw.) Planch.	1	Vulnerable	0	0	0	0	0	0	0	0	0	0	0	0	0	0	0	0	0	0	0	0	0	0	0	0	0	0	0	0	0	0	0	1	1	0	0	1	0	0	0	0	0	0	0	0
Ericales	Ericaceae	Pieris formosa	(Wall.) D.Don	1	Not assessed	0	0	0	0	0	0	0	0	0	1	0	0	0	0	0	0	0	0	0	0	0	0	0	0	0	1	0	0	0	0	0	0	0	0	0	0	0	0	0	0	0	0	0	0
Cornales	Hydrangeaceae	Pileostegia viburnoides	Hook.f. & Thomson	1	Not assessed	0	0	0	0	0	0	0	0	0	1	0	0	0	0	0	0	0	0	0	0	0	0	0	0	0	0	0	0	0	0	0	0	0	0	0	0	0	0	0	0	0	0	0	0
Fabales	Fabaceae	Piliostigma thonningii	(Schumach.) Milne-Redh.	1	Not assessed	0	0	0	0	0	0	0	0	0	0	0	0	0	0	0	0	0	1	1	1	1	1	0	0	0	0	0	0	0	0	0	0	0	0	0	0	0	0	0	0	0	0	0	0
Myrtales	Myrtaceae	Pimenta racemosa	(Mill.) J.W.Moore	1	Not assessed	0	0	0	0	0	0	0	0	0	0	0	0	0	0	0	0	0	0	0	0	0	0	0	0	0	0	0	0	0	0	0	1	0	0	0	0	0	0	0	0	0	0	0	0
Arecales	Arecaceae	Pinanga coronata	(Blume ex Mart.) Blume	2	Not assessed	0	0	1	0	0	0	0	0	0	0	0	0	0	0	0	0	0	0	0	0	0	0	0	0	0	0	1	0	0	0	0	0	0	0	0	0	0	0	0	0	0	0	0	0
Pinales	Pinaceae	Pinus arizonica	Engelm.	2	Least concern	0	0	0	0	0	0	0	0	0	0	0	0	0	0	0	1	0	0	0	0	0	0	0	0	0	0	0	0	0	0	0	0	0	0	0	0	0	0	0	0	0	0	0	0
Pinales	Pinaceae	Pinus ayacahuite	Ehrenb. ex Schltdl.	1	Least concern	0	0	0	0	0	0	0	0	0	0	0	0	0	0	0	1	0	0	0	0	0	0	0	0	0	0	0	0	0	0	0	1	0	0	0	0	0	0	0	0	0	0	0	0
Pinales	Pinaceae	Pinus canariensis	S. Cm.	9	Least concern	1	0	1	0	0	0	0	0	0	0	0	0	1	0	0	0	0	0	0	0	0	0	0	0	0	0	0	0	0	0	0	0	0	0	0	0	0	0	0	0	0	0	0	0
Pinales	Pinaceae	Pinus caribaea var. hondurensis	(Sénécl.) W.H. Barrett & Golfari	1	Least concern	0	0	0	0	0	0	0	0	0	0	0	0	0	0	0	0	0	0	0	0	0	0	0	0	0	0	0	0	0	0	0	1	0	0	0	0	0	0	0	0	0	0	0	0
Pinales	Pinaceae	Pinus cembrioides	Zucc.	3	Least concern	0	0	0	0	0	0	0	0	0	0	0	0	0	0	0	1	0	0	0	0	0	0	0	0	0	0	0	0	0	0	0	0	0	0	0	0	0	0	0	0	0	0	0	0
Pinales	Pinaceae	Pinus densiflora	Siebold & Zucc.	1	Least concern	0	0	0	0	1	0	0	0	0	1	0	0	0	0	0	0	0	0	0	0	0	0	0	0	0	0	0	0	0	0	0	0	0	0	0	0	0	0	0	0	0	0	0	0
Pinales	Pinaceae	Pinus devoniana	Lindl.	1	Least concern	0	0	0	0	0	0	0	0	0	0	0	0	0	0	0	1	0	0	0	0	0	0	0	0	0	0	0	0	0	0	0	1	0	0	0	0	0	0	0	0	0	0	0	0
Pinales	Pinaceae	Pinus douglasiana	Martínez	1	Least concern	0	0	0	0	1	0	0	0	0	0	0	0	0	0	0	1	0	0	0	0	0	0	0	0	0	0	0	0	0	0	0	1	0	0	0	0	0	0	0	0	0	0	0	0
Pinales	Pinaceae	Pinus durangensis	Martínez	1	Near threatened	0	0	0	0	0	0	0	0	0	0	0	0	0	0	0	1	0	0	0	0	0	0	0	0	0	0	0	0	0	0	0	0	0	0	0	0	0	0	0	0	0	0	0	0
Pinales	Pinaceae	Pinus echinata	Mill.	4	Least concern	0	0	0	0	0	0	0	0	0	0	0	0	0	1	1	0	0	0	0	0	0	0	0	0	0	0	0	0	0	0	0	0	0	0	0	0	0	0	0	0	0	0	0	0
Pinales	Pinaceae	Pinus edulis	Engelm.	1	Least concern	0	0	0	0	0	0	0	0	0	0	0	0	0	0	0	1	0	0	0	0	0	0	0	0	0	0	0	0	0	0	0	0	0	0	0	0	0	0	0	0	0	0	0	0
Pinales	Pinaceae	Pinus elliottii	Engelm.	6	Least concern	0	1	1	0	0	0	0	0	0	0	0	0	0	0	1	0	0	0	0	0	0	0	0	0	0	0	0	0	0	0	0	0	0	0	0	0	0	0	0	0	0	0	0	0
Pinales	Pinaceae	Pinus engelmannii	Carrière	1	Least concern	0	0	0	0	0	0	0	0	0	0	0	0	0	0	0	1	0	0	0	0	0	0	0	0	0	0	0	0	0	0	0	0	0	0	0	0	0	0	0	0	0	0	0	0
Pinales	Pinaceae	Pinus glabra	Walter	1	Least concern	0	0	1	0	0	0	0	0	0	0	0	0	0	0	1	0	0	0	0	0	0	0	0	0	0	0	0	0	0	0	0	0	0	0	0	0	0	0	0	0	0	0	0	0
Pinales	Pinaceae	Pinus halepensis	Mill.	8	Least concern	0	1	1	0	0	0	0	0	0	0	0	1	0	0	0	0	0	0	0	0	0	0	0	0	0	0	0	0	0	0	0	0	0	0	0	0	0	0	0	0	0	0	0	0
Pinales	Pinaceae	Pinus heldreichii	H. Christ	1	Least concern	0	0	0	0	0	0	0	0	0	0	0	1	0	0	0	0	0	0	0	0	0	0	0	0	0	0	0	0	0	0	0	0	0	0	0	0	0	0	0	0	0	0	0	0
Pinales	Pinaceae	Pinus kesiya	Royle ex Gordon	3	Least concern	0	0	1	0	0	0	0	0	0	0	0	0	0	0	0	0	0	0	0	0	0	0	0	0	0	1	1	0	0	0	0	0	0	0	0	0	0	0	0	0	0	0	0	0
Pinales	Pinaceae	Pinus lawsonii	Roezl ex Gordon	1	Least concern	0	0	0	0	0	0	0	0	0	0	0	0	0	0	0	1	0	0	0	0	0	0	0	0	0	0	0	0	0	0	0	0	0	0	0	0	0	0	0	0	0	0	0	0
Pinales	Pinaceae	Pinus leiophylla	Schiede ex Schltdl. & Cham.	3	Least concern	0	0	0	0	0	0	0	0	0	0	0	0	0	0	0	1	0	0	0	0	0	0	0	0	0	0	0	0	0	0	0	0	0	0	0	0	0	0	0	0	0	0	0	0
Pinales	Pinaceae	Pinus luzmariae	Pérez de la Rosa	1	Near threatened	0	0	0	0	0	0	0	0	0	0	0	0	0	0	0	1	0	0	0	0	0	0	0	0	0	0	0	0	0	0	0	1	0	0	0	0	0	0	0	0	0	0	0	0
Pinales	Pinaceae	Pinus massoniana	Lamb.	1	Least concern	0	0	0	0	0	0	0	0	0	1	0	0	0	0	0	0	0	0	0	0	0	0	0	0	0	0	0	0	0	0	0	0	0	0	0	0	0	0	0	0	0	0	0	0
Pinales	Pinaceae	Pinus montezumae	Lamb.	3	Least concern	0	0	0	0	0	0	0	0	0	0	0	0	0	0	0	1	0	0	0	0	0	0	0	0	0	0	0	0	0	0	0	1	0	0	0	0	0	0	0	0	0	0	0	0
Pinales	Pinaceae	Pinus monticola	Douglas ex D. Don	1	Near threatened	0	0	0	0	0	0	0	0	0	0	0	0	0	0	0	1	0	0	0	0	0	0	0	0	0	0	0	0	0	0	0	0	0	0	0	0	0	0	0	0	0	0	0	0
Pinales	Pinaceae	Pinus muricata	D. Don	1	Vulnerable	0	0	1	0	0	0	0	0	0	0	0	0	0	0	0	1	0	0	0	0	0	0	0	0	0	0	0	0	0	0	0	0	0	0	0	0	0	0	0	0	0	0	0	0
Pinales	Pinaceae	Pinus nigra	J.F. Arnold	2	Least concern	0	1	1	0	0	0	0	0	0	0	0	1	0	0	0	0	0	0	0	0	0	0	0	0	0	0	0	0	0	0	0	0	0	0	0	0	0	0	0	0	0	0	0	0
Pinales	Pinaceae	Pinus nigra subsp. laricio	(Poir.) Maire	1	Least concern	0	0	0	0	0	0	0	0	0	0	0	1	0	0	0	0	0	0	0	0	0	0	0	0	0	0	0	0	0	0	0	0	0	0	0	0	0	0	0	0	0	0	0	0
Pinales	Pinaceae	Pinus oocarpa	Schiede ex Schltdl.	5	Least concern	0	0	1	0	0	0	0	0	0	0	0	0	0	0	0	0	0	0	0	0	0	0	0	0	0	0	0	0	0	0	0	1	0	0	0	0	0	0	0	0	0	0	0	0
Pinales	Pinaceae	Pinus palustris	Mill.	3	Endangered	0	0	0	0	0	0	0	0	0	0	0	0	0	0	1	0	0	0	0	0	0	0	0	0	0	0	0	0	0	0	0	0	0	0	0	0	0	0	0	0	0	0	0	0
Pinales	Pinaceae	Pinus patula	Schiede ex Schltdl. & Cham.	9	Least concern	1	1	1	0	0	0	0	0	0	0	0	0	0	0	0	1	0	0	0	0	0	0	0	0	0	0	0	0	0	0	0	1	0	0	0	0	0	0	0	0	0	0	0	0
Pinales	Pinaceae	Pinus pinaster	Aiton	2	Least concern	1	1	1	1	0	0	0	0	0	0	0	1	0	0	0	0	0	0	0	0	0	0	0	0	0	0	0	0	0	0	0	0	0	0	0	0	0	0	0	0	0	0	0	0
Pinales	Pinaceae	Pinus pinaster subsp. escarena	(Risso) K. Richt.	1	Least concern	0	0	0	0	0	0	0	0	0	0	0	1	0	0	0	0	0	0	0	0	0	0	0	0	0	0	0	0	0	0	0	0	0	0	0	0	0	0	0	0	0	0	0	0
Pinales	Pinaceae	Pinus pinea	L.	5	Least concern	0	0	1	0	0	0	0	0	0	0	0	1	0	0	0	0	0	0	0	0	0	0	0	0	0	0	0	0	0	0	0	0	0	0	0	0	0	0	0	0	0	0	0	0
Pinales	Pinaceae	Pinus ponderosa	Douglas ex C. Lawson	2	Least concern	0	0	1	0	0	0	0	0	0	0	0	0	0	0	0	1	0	0	0	0	0	0	0	0	0	0	0	0	0	0	0	0	0	0	0	0	0	0	0	0	0	0	0	0
Pinales	Pinaceae	Pinus pseudostrobus var. pseudostrobus	Lindl.	2	Least concern	0	0	0	0	0	0	0	0	0	0	0	0	0	0	0	0	0	0	0	0	0	0	0	0	0	0	0	0	0	0	0	1	0	0	0	0	0	0	0	0	0	0	0	0
Pinales	Pinaceae	Pinus radiata	D. Don	6	Endangered	1	1	1	0	0	0	0	0	0	0	0	0	0	0	0	1	0	0	0	0	0	0	0	0	0	0	0	0	0	0	0	0	0	0	0	0	0	0	0	0	0	0	0	0
Pinales	Pinaceae	Pinus resinosa	Aiton	1	Least concern	0	0	0	0	0	0	0	0	0	0	0	0	0	1	0	0	0	0	0	0	0	0	0	0	0	0	0	0	0	0	0	0	0	0	0	0	0	0	0	0	0	0	0	0
Pinales	Pinaceae	Pinus rigida	Mill.	1	Least concern	0	0	0	0	0	0	0	0	0	0	0	0	0	0	0	1	0	0	0	0	0	0	0	0	0	0	0	0	0	0	0	0	0	0	0	0	0	0	0	0	0	0	0	0
Pinales	Pinaceae	Pinus roxburghii	Sarg.	16	Least concern	1	0	0	0	0	0	0	0	0	0	0	0	0	0	0	0	1	0	0	0	0	0	0	0	1	0	0	0	0	0	0	0	0	0	0	0	0	0	0	0	0	0	0	0
Pinales	Pinaceae	Pinus strobus	L.	1	Least concern	0	0	1	0	0	0	0	0	0	0	0	0	0	1	0	0	0	0	0	0	0	0	0	0	0	0	0	0	0	0	0	0	0	0	0	0	0	0	0	0	0	0	0	0
Pinales	Pinaceae	Pinus sylvestris	L.	3	Least concern	0	0	1	0	0	0	0	1	1	0	1	1	0	0	0	0	0	0	0	0	0	0	0	0	0	0	0	0	0	0	0	0	0	0	0	0	0	0	0	0	0	0	0	0
Pinales	Pinaceae	Pinus taeda	L.	6	Least concern	1	0	1	0	0	0	0	0	0	0	0	0	0	0	1	0	0	0	0	0	0	0	0	0	0	0	0	0	0	0	0	0	0	0	0	0	0	0	0	0	0	0	0	0
Pinales	Pinaceae	Pinus taiwanensis	Hayata	1	Least concern	0	0	0	0	0	0	0	0	0	1	0	0	0	0	0	0	0	0	0	0	0	0	0	0	0	0	0	0	0	0	0	0	0	0	0	0	0	0	0	0	0	0	0	0
Pinales	Pinaceae	Pinus tecunumanii	Eguiluz & J.P.Perry	1	Vulnerable	0	0	0	0	0	0	0	0	0	0	0	0	0	0	0	0	0	0	0	0	0	0	0	0	0	0	0	0	0	0	0	1	0	0	0	0	0	0	0	0	0	0	0	0
Pinales	Pinaceae	Pinus thunbergii	Parl.	3	Least concern	0	0	0	0	0	0	0	0	0	1	0	0	0	0	0	0	0	0	0	0	0	0	0	0	0	0	0	0	0	0	0	0	0	0	0	0	0	0	0	0	0	0	0	0
Pinales	Pinaceae	Pinus wallichiana	A.B. Jacks.	3	Least concern	0	0	0	0	0	0	0	0	0	1	0	0	0	0	0	0	1	0	0	0	0	0	0	0	1	0	0	0	0	0	0	0	0	0	0	0	0	0	0	0	0	0	0	0
Piperales	Piperaceae	Piper nigrum	L.	1	Not assessed	0	0	0	0	0	0	0	0	0	1	0	0	0	0	0	0	0	0	0	0	0	0	0	0	0	1	0	0	0	0	0	0	0	0	0	0	0	0	0	0	0	0	0	0
Fabales	Fabaceae	Piscidia piscipula	Bunge	1	Not assessed	0	0	0	0	0	0	0	0	0	0	0	0	0	0	0	0	0	0	0	0	0	0	0	0	0	0	0	0	0	0	0	1	0	0	0	0	0	0	0	0	0	0	0	0
Sapindales	Anacardiaceae	Pistacia atlantica	Desf.	1	Near threatened	0	0	1	0	0	0	0	0	0	0	1	1	0	0	0	0	0	0	0	0	0	0	0	0	0	0	0	0	0	0	0	0	0	0	0	0	0	0	0	0	0	0	0	0
Sapindales	Anacardiaceae	Pistacia chinensis	Bunge	1	Least concern	0	0	1	0	1	0	0	0	0	1	0	0	0	0	0	0	0	0	0	0	0	0	0	0	0	0	0	0	0	0	0	0	0	0	0	0	0	0	0	0	0	0	0	0
Sapindales	Anacardiaceae	Pistacia lentiscus	L.	1	Least concern	0	0	0	0	0	0	0	0	0	0	0	1	1	0	0	0	0	0	0	0	0	0	0	0	0	0	0	0	0	0	0	0	0	0	0	0	0	0	0	0	0	0	0	0
Sapindales	Anacardiaceae	Pistacia vera	L.	1	Near threatened	0	0	0	0	0	0	0	0	0	0	1	0	0	0	0	0	0	0	0	0	0	0	0	0	0	0	0	0	0	0	0	0	0	0	0	0	0	0	0	0	0	0	0	0
Fabales	Fabaceae	Pithecellobium dulce	(Roxb.) Benth.	1	Not assessed	0	0	1	0	0	0	0	0	0	0	0	0	0	0	0	0	0	0	0	0	0	0	0	0	0	0	0	0	0	0	0	1	0	0	0	0	0	0	0	0	0	0	0	0
Apiales	Pittosporaceae	Pittosporum crassifolium	Banks & Sol. ex A.Cunn.	1	Not assessed	1	0	0	0	0	0	0	0	0	0	0	0	0	0	0	0	0	0	0	0	0	0	0	0	0	0	0	0	0	0	0	0	0	0	0	0	0	0	0	1	0	0	0	0
Apiales	Pittosporaceae	Pittosporum eugenioides cv. 'Variegatum'	A.Cunn.	1	NA	0	0	0	0	0	0	0	0	0	0	0	0	0	0	0	0	0	0	0	0	0	0	0	0	0	0	0	0	0	0	0	0	0	0	0	0	0	0	0	0	0	0	0	0
Apiales	Pittosporaceae	Pittosporum tenuifolium	Banks & Sol. ex Gaertn.	2	Not assessed	0	0	0	1	0	0	0	0	0	0	0	0	0	0	0	0	0	0	0	0	0	0	0	0	0	0	0	0	0	0	0	0	0	0	0	0	0	0	0	0	0	0	1	0
Apiales	Pittosporaceae	Pittosporum tobira	(Thunb.) W.T.Aiton	1	Not assessed	0	0	1	0	0	0	0	0	0	1	0	0	0	0	0	0	0	0	0	0	0	0	0	0	0	0	0	0	0	0	0	0	0	0	0	0	0	0	0	0	0	0	0	0
Apiales	Pittosporaceae	Pittosporum undulatum	Vent.	4	Not assessed	0	1	1	1	1	0	0	0	0	0	0	0	0	0	0	0	0	0	0	0	0	0	0	0	0	0	0	0	0	0	0	0	0	0	0	0	0	0	0	1	0	0	0	0
Apiales	Pittosporaceae	Pittosporum viridiflorum	Sims	13	Not assessed	0	0	0	1	0	0	0	0	0	0	0	0	0	0	0	0	0	1	1	0	1	1	1	0	0	0	0	0	0	0	0	0	0	0	0	0	0	0	0	0	0	0	0	0
Proteales	Platanaceae	Platanus × hispanica cv. 'Acerifolia'	Mill. ex Münchh.	18	NA	1	0	1	0	1	1	0	0	0	0	0	0	0	0	0	0	0	0	0	0	0	0	0	0	0	0	0	0	0	0	0	0	0	0	0	0	0	0	0	0	0	0	0	0
Proteales	Platanaceae	Platanus occidentalis	L.	4	Least concern	0	0	0	0	1	0	0	0	0	0	0	1	0	0	0	0	0	0	0	0	0	0	0	0	0	0	0	0	0	0	0	0	0	0	0	0	0	0	0	0	0	0	0	0
Proteales	Platanaceae	Platanus orientalis	L.	2	Data deficient	0	0	0	0	1	0	0	0	0	0	0	1	0	0	0	0	0	0	0	0	0	0	0	0	0	0	0	0	0	0	0	0	0	0	0	0	0	0	0	0	0	0	0	0
Proteales	Platanaceae	Platanus racemosa	Nutt.	1	Not assessed	0	0	0	0	0	0	0	0	0	0	0	0	0	0	0	1	0	0	0	0	0	0	0	0	0	0	0	0	0	0	0	0	0	0	0	0	0	0	0	0	0	0	0	0
Proteales	Platanaceae	Platanus wrightii	S. Watson	2	Not assessed	0	0	0	0	1	0	0	0	0	0	0	0	0	0	0	1	0	0	0	0	0	0	0	0	0	0	0	0	0	0	0	0	0	0	0	0	0	0	0	0	0	0	0	0
Cupressales	Cupressaceae	Platycladus orientalis	(L.) Franco	15	Near threatened	0	0	0	0	0	0	0	0	0	1	1	0	0	0	0	0	0	0	0	0	0	0	0	0	0	0	0	0	0	0	0	0	0	0	0	0	0	0	0	0	0	0	0	0
Cupressales	Cupressaceae	Platycladus orientalis cv. 'Aureum'	(L.) Franco	1	NA	0	0	0	0	0	0	0	0	0	0	0	0	0	0	0	0	0	0	0	0	0	0	0	0	0	0	0	0	0	0	0	0	0	0	0	0	0	0	0	0	0	0	0	0
Oxalidales	Cunoniaceae	Platylophus trifoliatus	D. Don	5	Not assessed	0	0	0	0	0	0	0	0	0	0	0	0	0	0	0	0	0	0	0	0	0	0	0	0	0	0	0	0	0	0	0	0	0	0	0	0	0	0	1	0	0	0	0	0
Fabales	Fabaceae	Platymiscium trinitatis	Benth.	1	Not assessed	0	0	0	0	0	0	0	0	0	0	0	0	0	0	0	0	0	0	0	0	0	0	0	0	0	0	0	0	0	0	0	1	1	0	0	0	0	0	0	0	0	0	0	0
Sapindales	Anacardiaceae	Pleiogynium timorense	(DC.) Leenh.	1	Not assessed	0	0	0	0	0	0	0	0	0	0	0	0	0	0	0	0	0	0	0	0	0	0	0	0	0	0	1	0	0	0	0	0	0	0	0	0	0	0	0	1	0	0	0	0
Apiales	Araliaceae	Plerandra elegantissima	(Veitch ex Mast.) Lowry, G.M. Plunkett & Frodin	2	Endangered	0	0	0	0	0	0	0	0	0	0	0	0	0	0	0	0	0	0	0	0	0	0	0	0	0	0	0	0	1	0	0	0	0	0	0	0	0	0	0	0	0	0	0	0
Myrtales	Melastomataceae	Pleroma elegans	Gardner	1	Not assessed	1	0	0	0	0	0	0	0	0	0	0	0	0	0	0	0	0	0	0	0	0	0	0	0	0	0	0	0	0	0	0	0	0	0	1	0	0	0	0	0	0	0	0	0
Myrtales	Melastomataceae	Pleroma granulosum	(Desr.) D.Don	6	Not assessed	1	0	0	0	0	0	0	0	0	0	0	0	0	0	0	0	0	0	0	0	0	0	0	0	0	0	0	0	0	0	0	0	0	0	1	0	0	0	0	0	0	0	0	0
Caryophyllales	Amaranthaceae	Pleuropetalum darwinii	Hook.f.	1	Vulnerable	0	0	0	0	0	0	0	0	0	0	0	0	0	0	0	0	0	0	0	0	0	0	0	0	0	0	0	0	0	0	0	0	0	0	0	1	0	0	0	0	0	0	0	0
Caryophyllales	Amaranthaceae	Pleuropetalum sprucei	(Hook.f.) Standl.	1	Least concern	0	0	0	0	0	0	0	0	0	0	0	0	0	0	0	0	0	0	0	0	0	0	0	0	0	0	0	0	0	0	0	1	0	0	0	0	0	0	0	0	0	0	0	0
Celastrales	Celastraceae	Pleurostylia capensis	(Turcz.) Loes.	2	Least concern	0	0	0	0	0	0	0	0	0	0	0	0	0	0	0	0	0	0	0	0	0	1	0	0	0	0	0	0	0	0	0	0	0	0	0	0	0	0	0	0	0	0	0	0
Myrtales	Myrtaceae	Plinia cauliflora	(DC.) Kausel	2	Not assessed	0	0	0	0	0	0	0	0	0	0	0	0	0	0	0	0	0	0	0	0	0	0	0	0	0	0	0	0	0	0	0	0	0	0	1	0	0	0	0	0	0	0	0	0
Caryophyllales	Plumbaginaceae	Plumbago auriculata	Lam.	7	Not assessed	0	0	1	0	0	0	0	0	0	0	0	0	0	0	0	0	0	0	0	0	0	1	0	0	0	0	0	0	0	0	0	0	0	0	0	0	0	0	0	0	0	0	0	0
Caryophyllales	Plumbaginaceae	Plumbago auriculata fo. alba	(Pasq.) Z.X. Peng	2	Not assessed	0	0	1	0	0	0	0	0	0	0	0	0	0	0	0	0	0	0	0	0	0	1	0	0	0	0	0	0	0	0	0	0	0	0	0	0	0	0	1	0	0	0	0	0
Caryophyllales	Plumbaginaceae	Plumbago zeylanica	L.	1	Not assessed	0	0	0	0	0	0	0	0	0	1	0	0	0	0	0	0	0	0	0	0	1	0	0	0	1	1	1	1	0	0	0	0	0	0	0	0	0	0	0	1	0	0	0	0
Gentianales	Apocynaceae	Plumeria alba	L.	2	Not assessed	0	0	0	0	0	0	0	0	0	1	0	0	0	0	0	0	0	0	0	0	0	0	0	0	0	0	0	0	0	0	0	1	0	0	0	0	0	0	0	0	0	0	0	0
Gentianales	Apocynaceae	Plumeria obtusa	L.	2	Not assessed	0	0	0	0	0	0	0	0	0	0	0	0	0	0	0	0	0	0	0	0	0	0	0	0	0	0	0	0	0	0	0	1	0	0	0	0	0	0	0	0	0	0	0	0
Gentianales	Apocynaceae	Plumeria pudica	Jacq.	1	Not assessed	0	0	0	0	0	0	0	0	0	0	0	0	0	0	0	0	0	0	0	0	0	0	0	0	0	0	0	0	0	0	0	1	0	0	0	0	0	0	0	0	0	0	0	0
Gentianales	Apocynaceae	Plumeria rubra	L.	7	Least concern	0	0	0	0	1	0	0	0	0	0	0	0	0	0	0	0	0	0	0	0	0	0	0	0	0	0	0	0	0	0	0	1	0	0	0	0	0	0	0	0	0	0	0	0
Fabales	Fabaceae	Podalyria calyptrata	(Retz.) Willd.	4	Least concern	0	0	0	0	1	1	0	0	0	0	0	0	0	0	0	0	0	0	0	0	0	0	0	0	0	0	0	0	0	0	0	0	0	0	0	0	0	0	1	0	0	0	0	0
Fabales	Fabaceae	Podalyria sericea	(Andrews) R.Br. ex W.T.Aiton	1	Not assessed	0	0	0	0	0	0	0	0	0	0	0	0	0	0	0	0	0	0	0	0	0	1	0	0	0	0	0	0	0	0	0	0	0	0	0	0	0	0	1	0	0	0	0	0
Podocarpales	Podocarpaceae	Podocarpus chinensis	(Roxb.) Wall. ex Forbes	2	Least concern	0	0	0	0	0	0	0	0	0	1	0	0	0	0	0	0	0	0	0	0	0	0	0	0	0	0	0	0	0	0	0	0	0	0	0	0	0	0	0	0	0	0	0	0
Podocarpales	Podocarpaceae	Podocarpus elatus	R.Br. ex Endl.	2	Least concern	0	0	0	0	0	0	0	0	0	0	0	0	0	0	0	0	0	0	0	0	0	0	0	0	0	0	0	0	0	0	0	0	0	0	0	0	0	0	0	1	0	0	0	0
Podocarpales	Podocarpaceae	Podocarpus elongatus	(Aiton) L'Her. ex Pers.	12	Least concern	0	0	0	0	0	0	0	0	0	0	0	0	0	0	0	0	0	0	0	0	0	0	0	0	0	0	0	0	0	0	0	0	0	0	0	0	0	0	1	0	0	0	0	0
Podocarpales	Podocarpaceae	Podocarpus henkelii	Stapf ex Dallim. & A.B. Jacks.	30	Endangered	0	0	0	0	1	0	0	0	0	0	0	0	0	0	0	0	0	0	0	0	1	1	0	0	0	0	0	0	0	0	0	0	0	0	0	0	0	0	0	0	0	0	0	0
Podocarpales	Podocarpaceae	Podocarpus latifolius	(Thunb.) R.Br. ex Mirb.	32	Least concern	0	0	0	0	0	0	0	0	0	0	0	0	0	0	0	0	0	0	0	0	0	0	0	0	0	0	0	0	0	0	0	0	0	0	0	0	0	0	1	0	0	0	0	0
Podocarpales	Podocarpaceae	Podocarpus lawrencii	Hook. f.	1	Least concern	0	0	0	0	0	0	0	0	0	0	0	0	0	0	0	0	0	0	0	0	0	0	0	0	0	0	0	0	0	0	0	0	0	0	0	0	0	0	0	1	0	0	0	0
Podocarpales	Podocarpaceae	Podocarpus macrophyllus	(Thunb.) Sweet	1	Least concern	0	0	0	0	0	0	0	0	0	1	0	0	0	0	0	0	0	0	0	0	0	0	0	0	0	0	0	0	0	0	0	0	0	0	0	0	0	0	0	0	0	0	0	0
Podocarpales	Podocarpaceae	Podocarpus milanjianus	Rendle	1	Least concern	0	0	0	0	0	0	0	0	0	0	0	0	0	0	0	0	0	0	0	1	1	0	0	0	0	0	0	0	0	0	0	0	0	0	0	0	0	0	0	0	0	0	0	0
Podocarpales	Podocarpaceae	Podocarpus nubigenus	Lindl.	1	Near threatened	0	0	0	0	0	0	0	0	0	0	0	0	0	0	0	0	0	0	0	0	0	0	0	0	0	0	0	0	0	0	0	0	0	0	0	1	0	0	0	0	0	0	0	0
Podocarpales	Podocarpaceae	Podocarpus totara	G.Benn. ex D.Don	3	Least concern	0	0	0	0	0	0	0	0	0	0	0	0	0	0	0	0	0	0	0	0	0	0	0	0	0	0	0	0	0	0	0	0	0	0	0	0	0	0	0	0	0	0	1	0
Lamiales	Bignoniaceae	Podranea ricasoliana	(Tanfani) Sprague	2	Not assessed	0	0	0	0	0	0	0	0	0	0	0	0	0	0	0	0	0	0	0	0	0	1	0	0	0	0	0	0	0	0	0	0	0	0	0	0	0	0	0	0	0	0	0	0
Fabales	Fabaceae	Poincianella pluviosa	(DC.) L.P. Queiroz	1	Not assessed	0	0	0	0	0	0	0	0	0	0	0	0	0	0	0	0	0	0	0	0	0	0	0	0	0	0	0	0	0	0	0	0	0	1	1	0	1	0	0	0	0	0	0	0
Fabales	Fabaceae	Polhillia canescens	C.H.Stirt.	1	Not assessed	0	0	0	0	0	0	0	0	0	0	0	0	0	0	0	0	0	0	0	0	0	0	0	0	0	0	0	0	0	0	0	0	0	0	0	0	0	0	1	0	0	0	0	0
Magnoliales	Annonaceae	Polyalthia longifolia	(Sonn.) Thaites	1	Not assessed	0	0	0	0	0	0	0	0	0	0	0	0	0	0	0	0	0	0	0	0	0	0	0	0	1	0	0	0	0	0	0	0	0	0	0	0	0	0	0	0	0	0	0	0
Magnoliales	Annonaceae	Polyalthia suberosa	(Roxb.) Thwaites	1	Not assessed	0	0	0	0	0	0	0	0	0	0	0	0	0	0	0	0	0	0	0	0	0	0	0	0	0	1	0	0	0	0	0	0	0	0	0	0	0	0	0	0	0	0	0	0
Fabales	Polygalaceae	Polygala fruticosa	P.J. Bergius	1	Not assessed	0	0	0	0	0	0	0	0	0	0	0	0	0	0	0	0	0	0	0	0	0	1	0	0	0	0	0	0	0	0	0	0	0	0	0	0	0	0	1	0	0	0	0	0
Fabales	Polygalaceae	Polygala myrtifolia	L.	5	Not assessed	0	1	1	0	0	0	0	0	0	0	0	0	0	0	0	0	0	0	0	0	0	1	0	0	0	0	0	0	0	0	0	0	0	0	0	0	0	0	0	0	0	0	0	0
Fabales	Polygalaceae	Polygala virgata	Thunb.	4	Not assessed	0	1	1	0	0	0	0	0	0	0	0	0	0	0	0	0	0	0	0	1	1	1	0	0	0	0	0	0	0	0	0	0	0	0	0	0	0	0	0	0	0	0	0	0
Apiales	Araliaceae	Polyscias fulva	(Hiern) Harms	1	Least concern	0	0	0	0	0	0	0	0	0	0	0	0	0	0	0	0	0	1	1	1	1	0	0	0	0	0	0	0	0	0	0	0	0	0	0	0	0	0	0	0	0	0	0	0
Fabales	Fabaceae	Pongamia pinnata	(L.) Pierre	2	Least concern	0	0	0	0	0	0	0	0	0	1	0	0	0	0	0	0	0	0	0	0	0	0	0	0	1	1	1	0	0	0	0	0	0	0	0	0	0	0	0	0	0	0	0	0
Malpighiales	Salicaceae	Populus × canescens	(Ait.) Sm.	3	Not assessed	1	0	1	0	1	1	0	1	0	0	1	1	0	0	0	0	0	0	0	0	0	0	0	0	0	0	0	0	0	0	0	0	0	0	0	0	0	0	0	0	0	0	0	0
Malpighiales	Salicaceae	Populus alba	L.	2	Not assessed	1	1	1	1	1	1	0	1	0	0	1	1	0	0	0	0	0	0	0	0	0	0	0	0	0	0	0	0	0	0	0	0	0	0	0	0	0	0	0	0	0	0	0	0
Malpighiales	Salicaceae	Populus deltoides	Marsh.	3	Least concern	1	0	1	0	0	0	0	0	0	0	0	0	0	1	1	1	0	0	0	0	0	0	0	0	0	0	0	0	0	0	0	0	0	0	0	0	0	0	0	0	0	0	0	0
Malpighiales	Salicaceae	Populus deltoides var. wislizeni	(S.Watson) Dorn	1	Not assessed	0	0	0	0	0	0	0	0	0	0	0	0	0	0	1	0	0	0	0	0	0	0	0	0	0	0	0	0	0	0	0	0	0	0	0	0	0	0	0	0	0	0	0	0
Malpighiales	Salicaceae	Populus fremontii	S.Watson	3	Not assessed	0	0	0	0	1	0	0	0	0	0	0	0	0	0	0	1	0	0	0	0	0	0	0	0	0	0	0	0	0	0	0	0	0	0	0	0	0	0	0	0	0	0	0	0
Malpighiales	Salicaceae	Populus nigra	L.	3	Least concern	0	0	1	0	1	1	0	1	0	0	0	1	0	0	0	0	0	0	0	0	0	0	0	0	0	0	0	0	0	0	0	0	0	0	0	0	0	0	0	0	0	0	0	0
Malpighiales	Salicaceae	Populus nigra cv. 'Italica'	L.	2	NA	1	0	0	0	0	0	0	0	0	0	0	0	0	0	0	0	0	0	0	0	0	0	0	0	0	0	0	0	0	0	0	0	0	0	0	0	0	0	0	0	0	0	0	0
Malpighiales	Salicaceae	Populus simonii	Carriére	2	Not assessed	0	0	0	0	0	0	0	0	0	1	1	0	0	0	0	0	0	0	0	0	0	0	0	0	0	0	0	0	0	0	0	0	0	0	0	0	0	0	0	0	0	0	0	0
Caryophyllales	Didiereaceae	Portulacaria afra	Jacq.	12	Least concern	0	0	0	0	0	0	0	0	0	0	0	0	0	0	0	0	0	0	0	0	0	1	0	0	0	0	0	0	0	0	0	0	0	0	0	0	0	0	0	0	0	0	0	0
Caryophyllales	Didiereaceae	Portulacaria afra cv. 'Variegata'	Jacq.	1	NA	0	0	0	0	0	0	0	0	0	0	0	0	0	0	0	0	0	0	0	0	0	0	0	0	0	0	0	0	0	0	0	0	0	0	0	0	0	0	0	0	0	0	0	0
Gentianales	Rubiaceae	Posoqueria latifolia	(Rudge) Schult.	1	Least concern	0	0	0	0	0	0	0	0	0	0	0	0	0	0	0	0	0	0	0	0	0	0	0	0	0	0	0	0	0	0	0	1	1	1	0	0	0	0	0	0	0	0	0	0
Ericales	Sapotaceae	Pouteria campechiana	(Kunth) Baehni	1	Least concern	0	0	0	0	0	0	0	0	0	0	0	0	0	0	0	0	0	0	0	0	0	0	0	0	0	0	0	0	0	0	0	1	0	0	0	0	0	0	0	0	0	0	0	0
Ericales	Sapotaceae	Pouteria dominigensis	(C.F.Gaertn.) Baehni	1	Not assessed	0	0	0	0	0	0	0	0	0	0	0	0	0	0	0	0	0	0	0	0	0	0	0	0	0	0	0	0	0	0	0	1	0	0	0	0	0	0	0	0	0	0	0	0
Ericales	Sapotaceae	Pouteria gardneriana	(A. DC.) Radlk.	1	Least concern	0	0	0	0	0	0	0	0	0	0	0	0	0	0	0	0	0	0	0	0	0	0	0	0	0	0	0	0	0	0	0	0	0	0	1	0	1	0	0	0	0	0	0	0
Ericales	Sapotaceae	Pouteria multiflora	(A. DC.) Eyma	1	Not assessed	0	0	0	0	0	0	0	0	0	0	0	0	0	0	0	0	0	0	0	0	0	0	0	0	0	0	0	0	0	0	0	1	1	0	0	1	0	0	0	0	0	0	0	0
Rosales	Urticaceae	Pouzolzia mixta	Solms	1	Least concern	0	0	0	0	0	0	0	0	0	0	0	0	0	0	0	0	0	0	0	0	1	1	0	0	0	0	0	0	0	0	0	0	0	0	0	0	0	0	0	0	0	0	0	0
Lamiales	Lamiaceae	Premna mooiensis	W. Piep.	2	Least concern	0	0	0	0	0	0	0	0	0	0	0	0	0	0	0	0	0	0	0	0	0	1	0	0	0	0	0	0	0	0	0	0	0	0	0	0	0	0	0	0	0	0	0	0
Arecales	Arecaceae	Pritchardia maideniana	Becc.	1	Not assessed	0	0	0	0	0	0	0	0	0	0	0	0	0	0	0	0	0	0	0	0	0	0	0	0	0	0	0	1	0	0	0	0	0	0	0	0	0	0	0	0	0	0	0	0
Fabales	Fabaceae	Prosopis glandulosa	Torr.	2	Not assessed	1	1	1	1	0	0	0	0	0	0	0	0	0	0	1	1	0	0	0	0	0	0	0	0	0	0	0	0	0	0	0	0	0	0	0	0	0	0	0	0	0	0	0	0
Proteales	Proteaceae	Protea × susannae cv. 'Pink Ice'	NA	2	NA	0	0	0	0	0	0	0	0	0	0	0	0	0	0	0	0	0	0	0	0	0	0	0	0	0	0	0	0	0	0	0	0	0	0	0	0	0	0	0	0	0	0	0	0
Proteales	Proteaceae	Protea aristata	E. Phillips	1	Vulnerable	0	0	0	0	0	0	0	0	0	0	0	0	0	0	0	0	0	0	0	0	0	0	0	0	0	0	0	0	0	0	0	0	0	0	0	0	0	0	1	0	0	0	0	0
Proteales	Proteaceae	Protea aurea subsp. aurea	(Burm.f.) Rourke	1	Least concern	0	0	0	0	0	0	0	0	0	0	0	0	0	0	0	0	0	0	0	0	0	0	0	0	0	0	0	0	0	0	0	0	0	0	0	0	0	0	1	0	0	0	0	0
Proteales	Proteaceae	Protea burchellii	Stapf	1	Not assessed	0	0	0	0	0	0	0	0	0	0	0	0	0	0	0	0	0	0	0	0	0	0	0	0	0	0	0	0	0	0	0	0	0	0	0	0	0	0	1	0	0	0	0	0
Proteales	Proteaceae	Protea caffra	Meisn.	4	Not assessed	0	0	0	0	0	0	0	0	0	0	0	0	0	0	0	0	0	0	0	0	0	1	0	0	0	0	0	0	0	0	0	0	0	0	0	0	0	0	0	0	0	0	0	0
Proteales	Proteaceae	Protea compacta	R.Br.	1	Least concern	0	0	0	0	0	0	0	0	0	0	0	0	0	0	0	0	0	0	0	0	0	0	0	0	0	0	0	0	0	0	0	0	0	0	0	0	0	0	1	0	0	0	0	0
Proteales	Proteaceae	Protea comptonii	Beard	1	Vulnerable	0	0	0	0	0	0	0	0	0	0	0	0	0	0	0	0	0	0	0	0	0	1	0	0	0	0	0	0	0	0	0	0	0	0	0	0	0	0	0	0	0	0	0	0
Proteales	Proteaceae	Protea cv. 'Liebencherry'	NA	1	NA	0	0	0	0	0	0	0	0	0	0	0	0	0	0	0	0	0	0	0	0	0	0	0	0	0	0	0	0	0	0	0	0	0	0	0	0	0	0	0	0	0	0	0	0
Proteales	Proteaceae	Protea cv. 'Susara	NA	1	NA	0	0	0	0	0	0	0	0	0	0	0	0	0	0	0	0	0	0	0	0	0	0	0	0	0	0	0	0	0	0	0	0	0	0	0	0	0	0	0	0	0	0	0	0
Proteales	Proteaceae	Protea cynaroides	(L.) L.	4	Not assessed	0	0	0	0	0	0	0	0	0	0	0	0	0	0	0	0	0	0	0	0	0	0	0	0	0	0	0	0	0	0	0	0	0	0	0	0	0	0	1	0	0	0	0	0
Proteales	Proteaceae	Protea cynaroides cv. 'Madiba'	L.	1	NA	0	0	0	0	0	0	0	0	0	0	0	0	0	0	0	0	0	0	0	0	0	0	0	0	0	0	0	0	0	0	0	0	0	0	0	0	0	0	0	0	0	0	0	0
Proteales	Proteaceae	Protea cynaroides cv. 'Red Rex'	L.	1	NA	0	0	0	0	0	0	0	0	0	0	0	0	0	0	0	0	0	0	0	0	0	0	0	0	0	0	0	0	0	0	0	0	0	0	0	0	0	0	0	0	0	0	0	0
Proteales	Proteaceae	Protea eximia	(Salisb. ex Knight) Fourc.	2	Not assessed	0	0	0	0	0	0	0	0	0	0	0	0	0	0	0	0	0	0	0	0	0	0	0	0	0	0	0	0	0	0	0	0	0	0	0	0	0	0	1	0	0	0	0	0
Proteales	Proteaceae	Protea eximia × susannae cv. 'Cardinal'	NA	1	NA	0	0	0	0	0	0	0	0	0	0	0	0	0	0	0	0	0	0	0	0	0	0	0	0	0	0	0	0	0	0	0	0	0	0	0	0	0	0	0	0	0	0	0	0
Proteales	Proteaceae	Protea gaguedi	J.F. Gmel.	1	Least concern	0	0	0	0	0	0	0	0	0	0	0	0	0	0	0	0	0	0	1	0	1	1	0	0	0	0	0	0	0	0	0	0	0	0	0	0	0	0	0	0	0	0	0	0
Proteales	Proteaceae	Protea grandiceps	Tratt.	2	Not assessed	0	0	0	0	0	0	0	0	0	0	0	0	0	0	0	0	0	0	0	0	0	0	0	0	0	0	0	0	0	0	0	0	0	0	0	0	0	0	1	0	0	0	0	0
Proteales	Proteaceae	Protea lacticolor	Salisb.	1	Not assessed	0	0	0	0	0	0	0	0	0	0	0	0	0	0	0	0	0	0	0	0	0	0	0	0	0	0	0	0	0	0	0	0	0	0	0	0	0	0	1	0	0	0	0	0
Proteales	Proteaceae	Protea lanceolata	E.Mey. ex Meisn.	1	Least concern	0	0	0	0	0	0	0	0	0	0	0	0	0	0	0	0	0	0	0	0	0	0	0	0	0	0	0	0	0	0	0	0	0	0	0	0	0	0	1	0	0	0	0	0
Proteales	Proteaceae	Protea laurifolia	Thunb.	3	Not assessed	0	0	0	0	0	0	0	0	0	0	0	0	0	0	0	0	0	0	0	0	0	0	0	0	0	0	0	0	0	0	0	0	0	0	0	0	0	0	1	0	0	0	0	0
Proteales	Proteaceae	Protea lorifolia	(Knight) Fourc.	1	Not assessed	0	0	0	0	0	0	0	0	0	0	0	0	0	0	0	0	0	0	0	0	0	0	0	0	0	0	0	0	0	0	0	0	0	0	0	0	0	0	1	0	0	0	0	0
Proteales	Proteaceae	Protea magnifica	Link	1	Least concern	0	0	0	0	0	0	0	0	0	0	0	0	0	0	0	0	0	0	0	0	0	0	0	0	0	0	0	0	0	0	0	0	0	0	0	0	0	0	1	0	0	0	0	0
Proteales	Proteaceae	Protea mundii	Klotzsch	4	Not assessed	0	0	0	0	1	0	0	0	0	0	0	0	0	0	0	0	0	0	0	0	0	0	0	0	0	0	0	0	0	0	0	0	0	0	0	0	0	0	1	0	0	0	0	0
Proteales	Proteaceae	Protea neriifolia	R.Br.	2	Not assessed	0	0	0	0	0	0	0	0	0	0	0	0	0	0	0	0	0	0	0	0	0	0	0	0	0	0	0	0	0	0	0	0	0	0	0	0	0	0	1	0	0	0	0	0
Proteales	Proteaceae	Protea nitida	Mill.	4	Not assessed	0	0	0	0	0	0	0	0	0	0	0	0	0	0	0	0	0	0	0	0	0	0	0	0	0	0	0	0	0	0	0	0	0	0	0	0	0	0	1	0	0	0	0	0
Proteales	Proteaceae	Protea obtusifolia	De Wild.	2	Near threatened	0	0	0	0	0	0	0	0	0	0	0	0	0	0	0	0	0	0	0	0	0	0	0	0	0	0	0	0	0	0	0	0	0	0	0	0	0	0	1	0	0	0	0	0
Proteales	Proteaceae	Protea punctata	Meisn.	2	Not assessed	0	0	0	0	0	0	0	0	0	0	0	0	0	0	0	0	0	0	0	0	0	0	0	0	0	0	0	0	0	0	0	0	0	0	0	0	0	0	1	0	0	0	0	0
Proteales	Proteaceae	Protea repens	L.	5	Not assessed	0	0	0	0	0	0	0	0	0	0	0	0	0	0	0	0	0	0	0	0	0	0	0	0	0	0	0	0	0	0	0	0	0	0	0	0	0	0	1	0	0	0	0	0
Proteales	Proteaceae	Protea roupelliae	Meisn.	2	Least concern	0	0	0	0	0	0	0	0	0	0	0	0	0	0	0	0	0	0	0	0	0	1	0	0	0	0	0	0	0	0	0	0	0	0	0	0	0	0	0	0	0	0	0	0
Proteales	Proteaceae	Protea scolymocephala	(L) Reichard	2	Vulnerable	0	0	0	0	0	0	0	0	0	0	0	0	0	0	0	0	0	0	0	0	0	0	0	0	0	0	0	0	0	0	0	0	0	0	0	0	0	0	1	0	0	0	0	0
Proteales	Proteaceae	Protea susannae	E.Phillips	1	Near threatened	0	0	0	0	0	0	0	0	0	0	0	0	0	0	0	0	0	0	0	0	0	0	0	0	0	0	0	0	0	0	0	0	0	0	0	0	0	0	1	0	0	0	0	0
Sapindales	Anacardiaceae	Protorhus longifolia	(Bernh.) Engl.	11	Not assessed	0	0	0	0	0	0	0	0	0	0	0	0	0	0	0	0	0	0	0	0	0	1	0	0	0	0	0	0	0	0	0	0	0	0	0	0	0	0	0	0	0	0	0	0
Podocarpales	Podocarpaceae	Prumnopitys andina	(Poepp. ex Endl.) de Laub.	1	Vulnerable	0	0	0	0	0	0	0	0	0	0	0	0	0	0	0	0	0	0	0	0	0	0	0	0	0	0	0	0	0	0	0	0	0	0	0	1	0	0	0	0	0	0	0	0
Podocarpales	Podocarpaceae	Prumnopitys ferruginea	(G.Benn. ex D.Don) de Laub.	1	Least concern	0	0	0	0	0	0	0	0	0	0	0	0	0	0	0	0	0	0	0	0	0	0	0	0	0	0	0	0	0	0	0	0	0	0	0	0	0	0	0	0	0	0	1	0
Podocarpales	Podocarpaceae	Prumnopitys taxifolia	(Sol. ex D.Don) de Laub.	2	Not assessed	0	0	0	0	0	0	0	0	0	0	0	0	0	0	0	0	0	0	0	0	0	0	0	0	0	0	0	0	0	0	0	0	0	0	0	0	0	0	0	0	0	0	1	0
Rosales	Rosaceae	Prunus africana	(Hook.f.) Kalkman	13	Vulnerable	0	0	0	0	1	0	0	0	0	0	0	0	0	0	0	0	0	0	0	1	1	1	0	0	0	0	0	0	0	0	0	0	0	0	0	0	0	0	0	0	0	0	0	0
Rosales	Rosaceae	Prunus angustifolia	Marsh	1	Least concern	0	0	0	0	0	0	0	0	0	0	0	0	0	0	1	0	0	0	0	0	0	0	0	0	0	0	0	0	0	0	0	0	0	0	0	0	0	0	0	0	0	0	0	0
Rosales	Rosaceae	Prunus avium	L.	1	Least concern	0	0	0	0	1	0	0	1	1	0	1	0	0	0	0	0	0	0	0	0	0	0	0	0	0	0	0	0	0	0	0	0	0	0	0	0	0	0	0	0	0	0	0	0
Rosales	Rosaceae	Prunus campanulata	Maxim.	3	Not assessed	0	0	0	1	0	0	0	0	0	1	0	0	0	0	0	0	0	0	0	0	0	0	0	0	0	1	0	0	0	0	0	0	0	0	0	0	0	0	0	0	0	0	0	0
Rosales	Rosaceae	Prunus cerasifera	Ehrh.	2	Not assessed	0	1	1	0	1	0	0	0	0	1	1	0	0	0	0	0	0	0	0	0	0	0	0	0	0	0	0	0	0	0	0	0	0	0	0	0	0	0	0	0	0	0	0	0
Rosales	Rosaceae	Prunus cerasifera cv. 'Atropurpurea'	Ehrh.	2	NA	0	0	0	0	0	0	0	0	0	0	0	0	0	0	0	0	0	0	0	0	0	0	0	0	0	0	0	0	0	0	0	0	0	0	0	0	0	0	0	0	0	0	0	0
Rosales	Rosaceae	Prunus cerasifera cv. 'Nigra'	Ehrh.	3	NA	0	0	0	0	0	0	0	0	0	0	0	0	0	0	0	0	0	0	0	0	0	0	0	0	0	0	0	0	0	0	0	0	0	0	0	0	0	0	0	0	0	0	0	0
Rosales	Rosaceae	Prunus cerasus	L.	1	Not assessed	0	0	1	0	0	0	0	0	0	0	1	0	0	0	0	0	0	0	0	0	0	0	0	0	0	0	0	0	0	0	0	0	0	0	0	0	0	0	0	0	0	0	0	0
Rosales	Rosaceae	Prunus domestica	L.	1	Data deficient	0	0	0	0	0	0	0	0	0	0	1	0	0	0	0	0	0	0	0	0	0	0	0	0	0	0	0	0	0	0	0	0	0	0	0	0	0	0	0	0	0	0	0	0
Rosales	Rosaceae	Prunus glandulosa	Thunb.	1	Data deficient	0	0	0	0	0	0	0	0	0	1	0	0	0	0	0	0	0	0	0	0	0	0	0	0	0	0	0	0	0	0	0	0	0	0	0	0	0	0	0	0	0	0	0	0
Rosales	Rosaceae	Prunus laurocerasus	L.	1	Least concern	0	1	1	0	0	0	0	0	0	0	1	1	0	0	0	0	0	0	0	0	0	0	0	0	0	0	0	0	0	0	0	0	0	0	0	0	0	0	0	0	0	0	0	0
Rosales	Rosaceae	Prunus mume	Siebold & Zucc.	1	Least concern	0	0	0	0	1	0	0	0	0	1	0	0	0	0	0	0	0	0	0	0	0	0	0	0	0	0	0	0	0	0	0	0	0	0	0	0	0	0	0	0	0	0	0	0
Rosales	Rosaceae	Prunus persica	(L.) Batsch.	5	Not assessed	1	0	1	0	1	1	0	0	0	1	0	0	0	0	0	0	0	0	0	0	0	0	0	0	0	0	0	0	0	0	0	0	0	0	0	0	0	0	0	0	0	0	0	0
Rosales	Rosaceae	Prunus persica cv. 'Versicolor'	(L.) Batsch.	1	NA	0	0	0	0	0	0	0	0	0	0	0	0	0	0	0	0	0	0	0	0	0	0	0	0	0	0	0	0	0	0	0	0	0	0	0	0	0	0	0	0	0	0	0	0
Rosales	Rosaceae	Prunus serotina	Ehrh.	1	Least concern	1	1	1	0	1	0	0	0	0	0	0	0	0	1	1	0	0	0	0	0	0	0	0	0	0	0	0	0	0	0	0	0	0	0	0	0	0	0	0	0	0	0	0	0
Rosales	Rosaceae	Prunus serrulata	Lindl.	4	Not assessed	0	0	0	0	1	0	0	0	0	1	0	0	0	0	0	0	0	0	0	0	0	0	0	0	0	0	0	0	0	0	0	0	0	0	0	0	0	0	0	0	0	0	0	0
Rosales	Rosaceae	Prunus spinosa	L.	1	Least concern	0	0	0	0	0	0	0	1	0	0	0	1	0	0	0	0	0	0	0	0	0	0	0	0	0	0	0	0	0	0	0	0	0	0	0	0	0	0	0	0	0	0	0	0
Sapindales	Meliaceae	Pseudobersama mossambicensis	(Sim) Verdc.	1	Near threatened	0	0	0	0	0	0	0	0	0	0	0	0	0	0	0	0	0	0	0	0	1	1	0	0	0	0	0	0	0	0	0	0	0	0	0	0	0	0	0	0	0	0	0	0
Malvales	Malvaceae	Pseudobombax ellipticum	(Kunth) Dugand	1	Least concern	0	0	0	0	0	0	0	0	0	0	0	0	0	0	0	0	0	0	0	0	0	0	0	0	0	0	0	0	0	0	0	1	0	0	0	0	0	0	0	0	0	0	0	0
Malvales	Malvaceae	Pseudobombax grandiflorum	(Cav.) A. Robyns	1	Not assessed	0	0	0	0	0	0	0	0	0	0	0	0	0	0	0	0	0	0	0	0	0	0	0	0	0	0	0	0	0	0	0	0	0	0	1	0	0	0	0	0	0	0	0	0
Malpighiales	Phyllanthaceae	Pseudolachnostylis maprouneifolia var. glabra	(Pax) Brenan	1	Not assessed	0	0	0	0	0	0	0	0	0	0	0	0	0	0	0	0	0	0	0	0	1	1	0	0	0	0	0	0	0	0	0	0	0	0	0	0	0	0	0	0	0	0	0	0
Malpighiales	Phyllanthaceae	Pseudolachnostylis maprouneifolia var. maprouneifolia	Pax	1	Least concern	0	0	0	0	0	0	0	0	0	0	0	0	0	0	0	0	0	0	0	1	1	1	0	0	0	0	0	0	0	0	0	0	0	0	0	0	0	0	0	0	0	0	0	0
Malpighiales	Salicaceae	Pseudoscolopia polyantha	Gilg	1	Near threatened	0	0	0	0	0	0	0	0	0	0	0	0	0	0	0	0	0	0	0	0	0	1	0	0	0	0	0	0	0	0	0	0	0	0	0	0	0	0	1	0	0	0	0	0
Pinales	Pinaceae	Pseudotsuga menziesii	(Mirb.) Franco	1	Least concern	0	0	1	0	0	0	0	0	0	0	0	0	0	0	0	1	0	0	0	0	0	0	0	0	0	0	0	0	0	0	0	0	0	0	0	0	0	0	0	0	0	0	0	0
Pinales	Pinaceae	Pseudotsuga sinensis	Dode	1	Vulnerable	0	0	0	0	0	0	0	0	0	1	0	0	0	0	0	0	0	0	0	0	0	0	0	0	0	0	0	0	0	0	0	0	0	0	0	0	0	0	0	0	0	0	0	0
Canallales	Winteraceae	Pseudowintera axillaris	(J.R. Forst. &G. Forst.) Dandy	1	Not assessed	0	0	0	0	0	0	0	0	0	0	0	0	0	0	0	0	0	0	0	0	0	0	0	0	0	0	0	0	0	0	0	0	0	0	0	0	0	0	0	0	0	0	1	0
Myrtales	Myrtaceae	Psidium cattleyanum	Sabine	6	Not assessed	1	1	1	1	0	0	0	0	0	0	0	0	0	0	0	0	0	0	0	0	0	0	0	0	0	0	0	0	0	0	0	0	0	0	1	0	1	0	0	0	0	0	0	0
Myrtales	Myrtaceae	Psidium guajava	L.	2	Least concern	1	1	1	1	1	0	0	0	0	0	0	0	0	0	0	0	0	0	0	0	0	0	0	0	0	0	0	0	0	0	0	1	0	0	0	1	0	0	0	0	0	0	0	0
Fabales	Fabaceae	Psoralea fleta	C.H.Stirt.	1	Not assessed	0	0	0	0	0	0	0	0	0	0	0	0	0	0	0	0	0	0	0	0	0	0	0	0	0	0	0	0	0	0	0	0	0	0	0	0	0	0	1	0	0	0	0	0
Fabales	Fabaceae	Psoralea pinnata	L.	5	Not assessed	0	1	1	1	1	1	0	0	0	0	0	0	0	0	0	0	0	0	0	0	0	1	0	0	0	0	0	0	0	0	0	0	0	0	0	0	0	0	1	0	0	0	0	0
Gentianales	Rubiaceae	Psychotria capensis	(Eckl.) Vatke	12	Least concern	0	0	0	0	0	0	0	0	0	0	0	0	0	0	0	0	0	0	0	0	1	1	0	0	0	0	0	0	0	0	0	0	0	0	0	0	0	0	0	0	0	0	0	0
Gentianales	Rubiaceae	Psychotria limonensis	K.Krause	1	Not assessed	0	0	0	0	0	0	0	0	0	0	0	0	0	0	0	0	0	0	0	0	0	0	0	0	0	0	0	0	0	0	0	1	0	0	0	0	0	0	0	0	0	0	0	0
Gentianales	Rubiaceae	Psychotria viridis	Ruiz & Pav.	1	Not assessed	0	0	0	0	0	0	0	0	0	0	0	0	0	0	0	0	0	0	0	0	0	0	0	0	0	0	0	0	0	0	0	0	1	1	1	0	0	0	0	0	0	0	0	0
Gentianales	Rubiaceae	Psychotria zombamontana	(Kuntze) E.M.A. Petit	1	Near threatened	0	0	0	0	0	0	0	0	0	0	0	0	0	0	0	0	0	0	0	0	1	1	0	0	0	0	0	0	0	0	0	0	0	0	0	0	0	0	0	0	0	0	0	0
Gentianales	Rubiaceae	Psydrax obovata	Ruiz & Pav.	5	Least concern	0	0	0	0	0	0	0	0	0	0	0	0	0	0	0	0	0	0	0	0	0	1	0	0	0	0	0	0	0	0	0	0	0	0	0	0	0	0	0	0	0	0	0	0
Gentianales	Rubiaceae	Psydrax subcordata	(DC.) Bridson	1	Not assessed	0	0	0	0	0	0	0	0	0	0	0	0	0	0	0	0	0	0	0	1	1	0	0	0	0	0	0	0	0	0	0	0	0	0	0	0	0	0	0	0	0	0	0	0
Sapindales	Rutaceae	Ptaeroxylon obliquum	(Thunb.) Radlk.	14	Not assessed	0	0	0	0	0	0	0	0	0	0	0	0	0	0	0	0	0	0	0	0	1	1	0	0	0	0	0	0	0	0	0	0	0	0	0	0	0	0	0	0	0	0	0	0
Myrtales	Combretaceae	Pteleopsis myrtifolia	(M.A.Lawson) Engl. & Diels	5	Not assessed	0	0	0	0	0	0	0	0	0	0	0	0	0	0	0	0	0	0	0	0	1	1	0	0	0	0	0	0	0	0	0	0	0	0	0	0	0	0	0	0	0	0	0	0
Fabales	Fabaceae	Pterocarpus angolensis	DC.	5	Near threatened	0	0	0	0	0	0	0	0	0	0	0	0	0	0	0	0	0	0	0	1	1	1	0	0	0	0	0	0	0	0	0	0	0	0	0	0	0	0	0	0	0	0	0	0
Fabales	Fabaceae	Pterocarpus brenanii	Barbosa & Torre	1	Least concern	0	0	0	0	0	0	0	0	0	0	0	0	0	0	0	0	0	0	0	0	1	0	0	0	0	0	0	0	0	0	0	0	0	0	0	0	0	0	0	0	0	0	0	0
Fabales	Fabaceae	Pterocarpus indicus	Willd.	1	Vulnerable	0	0	0	0	0	0	0	0	0	1	0	0	0	0	0	0	0	0	0	0	0	0	0	0	0	1	1	0	0	1	0	0	0	0	0	0	0	0	0	0	0	0	0	0
Fabales	Fabaceae	Pterocarpus rotundifolius	(Sond.) Druce	8	Least concern	0	0	0	0	0	0	0	0	0	0	0	0	0	0	0	0	0	0	0	1	1	1	0	0	0	0	0	0	0	0	0	0	0	0	0	0	0	0	0	0	0	0	0	0
Fabales	Fabaceae	Pterocarpus santalinus	Blanco	1	Near threatened	0	0	0	0	0	0	0	0	0	0	0	0	0	0	0	0	0	0	0	0	0	0	0	0	1	0	0	0	0	0	0	0	0	0	0	0	0	0	0	0	0	0	0	0
Fagales	Juglandaceae	Pterocarya stenoptera	DC.	2	Least concern	1	0	0	0	0	0	0	0	0	1	0	0	0	0	0	0	0	0	0	0	0	0	0	0	0	0	0	0	0	0	0	0	0	0	0	0	0	0	0	0	0	0	0	0
Celastrales	Celastraceae	Pterocelastrus rostratus	Walp.	2	Least concern	0	0	0	0	0	0	0	0	0	0	0	0	0	0	0	0	0	0	0	0	1	1	0	0	0	0	0	0	0	0	0	0	0	0	0	0	0	0	0	0	0	0	0	0
Celastrales	Celastraceae	Pterocelastrus tricuspidatus	(Lam.) Sond.	4	Least concern	0	0	0	0	0	0	0	0	0	0	0	0	0	0	0	0	0	0	0	0	0	1	0	0	0	0	0	0	0	0	0	0	0	0	0	0	0	0	1	0	0	0	0	0
Malvales	Malvaceae	Pterospermum acerifolium	Willd.	1	Not assessed	0	0	0	0	0	0	0	0	0	1	0	0	0	0	0	0	0	0	0	0	0	0	0	0	1	1	1	0	0	0	0	0	0	0	0	0	0	0	0	0	0	0	0	0
Malvales	Malvaceae	Pterospermum heyneanum	Wall. ex Wight & Arn.	1	Not assessed	0	0	0	0	0	0	0	0	0	0	0	0	0	0	0	0	0	0	0	0	0	0	0	0	1	0	0	0	0	0	0	0	0	0	0	0	0	0	0	0	0	0	0	0
Malvales	Malvaceae	Pterospermum semisagittatum	Buch.-Ham. ex Roxb.	1	Not assessed	0	0	0	0	0	0	0	0	0	0	0	0	0	0	0	0	0	0	0	0	0	0	0	0	0	1	0	0	0	0	0	0	0	0	0	0	0	0	0	0	0	0	0	0
Malvales	Malvaceae	Pterygota alata	(Roxb.) R.Br.	1	Not assessed	0	0	0	0	0	0	0	0	0	0	0	0	0	0	0	0	0	0	0	0	0	0	0	0	1	0	0	0	0	0	0	0	0	0	0	0	0	0	0	0	0	0	0	0
Arecales	Arecaceae	Ptychosperma elegans	(R.Br.) Blume	1	Least concern	0	0	0	0	0	0	0	0	0	0	0	0	0	0	0	0	0	0	0	0	0	0	0	0	0	0	0	0	0	0	0	0	0	0	0	0	0	0	0	1	0	0	0	0
Arecales	Arecaceae	Ptychosperma macarthurii	(H. Wendl. ex H.J. Veitch) H. Wendl. ex Hook.f.	1	Not assessed	0	0	1	0	0	0	0	0	0	0	0	0	0	0	0	0	0	0	0	0	0	0	0	0	0	0	1	0	0	0	0	0	0	0	0	0	0	0	0	1	0	0	0	0
Arecales	Arecaceae	Ptychosperma microcarpum	(Burret) Burret	1	Least concern	0	0	0	0	0	0	0	0	0	0	0	0	0	0	0	0	0	0	0	0	0	0	0	0	0	0	1	0	0	0	0	0	0	0	0	0	0	0	0	0	0	0	0	0
Myrtales	Lythraceae	Punica granatum	L.	5	Least concern	1	0	1	0	0	0	0	1	0	0	1	0	0	0	0	0	0	0	0	0	0	0	0	0	0	0	0	0	0	0	0	0	0	0	0	0	0	0	0	0	0	0	0	0
Celastrales	Celastraceae	Putterlickia pyracantha	(L.) Szyszyl.	3	Least concern	0	0	0	0	0	0	0	0	0	0	0	0	0	0	0	0	0	0	0	0	0	1	0	0	0	0	0	0	0	0	0	0	0	0	0	0	0	0	1	0	0	0	0	0
Celastrales	Celastraceae	Putterlickia verrucosa	(E.Mey. ex Sond.) Szyszyl.	1	Least concern	0	0	0	0	0	0	0	0	0	0	0	0	0	0	0	0	0	0	0	0	0	1	0	0	0	0	0	0	0	0	0	0	0	0	0	0	0	0	0	0	0	0	0	0
Rosales	Rosaceae	Pyracantha angustifolia	(Franch.) C.K.Schneid.	5	Not assessed	1	1	1	0	0	0	0	0	0	1	0	0	0	0	0	0	0	0	0	0	0	0	0	0	0	0	0	0	0	0	0	0	0	0	0	0	0	0	0	0	0	0	0	0
Rosales	Rosaceae	Pyracantha coccinea	M.J.Roemer	3	Not assessed	1	0	1	0	0	0	0	1	0	0	0	1	0	0	0	0	0	0	0	0	0	0	0	0	0	0	0	0	0	0	0	0	0	0	0	0	0	0	0	0	0	0	0	0
Rosales	Rosaceae	Pyracantha crenulata	(D.Don) M.Roem.	1	Not assessed	1	1	1	0	0	0	0	0	0	1	0	0	0	0	0	0	0	0	0	0	0	0	0	0	1	1	0	0	0	0	0	0	0	0	0	0	0	0	0	0	0	0	0	0
Lamiales	Bignoniaceae	Pyrostegia venusta	(Ker Gawl.) Miers	2	Not assessed	0	0	0	0	0	0	0	0	0	0	0	0	0	0	0	0	0	0	0	0	0	0	0	0	0	0	0	0	0	0	0	0	0	0	1	0	0	0	0	0	0	0	0	0
Rosales	Rosaceae	Pyrus calleryana	Decne.	2	Not assessed	0	0	1	1	0	0	0	0	0	1	0	0	0	0	0	0	0	0	0	0	0	0	0	0	0	0	0	0	0	0	0	0	0	0	0	0	0	0	0	0	0	0	0	0
Rosales	Rosaceae	Pyrus communis	L.	1	Least concern	0	0	0	0	0	0	0	1	0	0	1	0	0	0	0	0	0	0	0	0	0	0	0	0	0	0	0	0	0	0	0	0	0	0	0	0	0	0	0	0	0	0	0	0
Fagales	Fagaceae	Quercus acutissima	Carruth.	9	Least concern	1	0	1	0	0	0	0	0	0	1	1	0	0	0	0	0	0	0	0	0	0	0	0	0	0	0	0	0	0	0	0	0	0	0	0	0	0	0	0	0	0	0	0	0
Fagales	Fagaceae	Quercus canariensis	Willd.	6	Data deficient	1	0	0	0	0	0	0	0	0	0	0	1	0	0	0	0	0	0	0	0	0	0	0	0	0	0	0	0	0	0	0	0	0	0	0	0	0	0	0	0	0	0	0	0
Fagales	Fagaceae	Quercus cerris	L.	13	Least concern	1	0	0	0	0	0	0	1	0	0	0	1	0	0	0	0	0	0	0	0	0	0	0	0	0	0	0	0	0	0	0	0	0	0	0	0	0	0	0	0	0	0	0	0
Fagales	Fagaceae	Quercus coccinea	Münchh.	2	Least concern	0	0	0	0	0	0	0	0	0	0	0	0	0	1	0	0	0	0	0	0	0	0	0	0	0	0	0	0	0	0	0	0	0	0	0	0	0	0	0	0	0	0	0	0
Fagales	Fagaceae	Quercus glauca	Thunb.	1	Least concern	0	0	0	0	0	0	0	0	0	1	0	0	0	0	0	0	0	0	0	0	0	0	0	0	0	0	0	0	0	0	0	0	0	0	0	0	0	0	0	0	0	0	0	0
Fagales	Fagaceae	Quercus ilex	L.	5	Least concern	0	0	0	0	1	0	0	0	0	0	0	1	0	0	0	0	0	0	0	0	0	0	0	0	0	0	0	0	0	0	0	0	0	0	0	0	0	0	0	0	0	0	0	0
Fagales	Fagaceae	Quercus incana	Roxb.	1	Not assessed	0	0	0	0	0	0	0	0	0	0	0	0	0	1	1	0	0	0	0	0	0	0	0	0	0	0	0	0	0	0	0	0	0	0	0	0	0	0	0	0	0	0	0	0
Fagales	Fagaceae	Quercus lanata	Sm.	2	Not assessed	0	0	0	0	0	0	0	0	0	1	1	0	0	0	0	0	0	0	0	0	0	0	0	0	0	0	0	0	0	0	0	0	0	0	0	0	0	0	0	0	0	0	0	0
Fagales	Fagaceae	Quercus leucotrichophora	A. Camus	5	Not assessed	0	0	0	0	0	0	0	0	0	0	0	0	0	0	0	0	0	0	0	0	0	0	0	0	1	1	0	0	0	0	0	0	0	0	0	0	0	0	0	0	0	0	0	0
Fagales	Fagaceae	Quercus macranthera	Fisch. & C.A.Mey. ex Hohen.	1	Not assessed	0	0	0	0	0	0	0	1	0	0	0	0	0	0	0	0	0	0	0	0	0	0	0	0	0	0	0	0	0	0	0	0	0	0	0	0	0	0	0	0	0	0	0	0
Fagales	Fagaceae	Quercus macrocarpa	Fisch. & C.A.Mey. ex Hohen.	3	Least concern	0	0	0	0	1	0	0	0	0	0	0	0	0	1	1	0	0	0	0	0	0	0	0	0	0	0	0	0	0	0	0	0	0	0	0	0	0	0	0	0	0	0	0	0
Fagales	Fagaceae	Quercus mexicana	Humb. & Bonpl.	1	Not assessed	0	0	0	0	1	0	0	0	0	0	0	0	0	0	0	0	0	0	0	0	0	0	0	0	0	0	0	0	0	0	0	1	0	0	0	0	0	0	0	0	0	0	0	0
Fagales	Fagaceae	Quercus nigra	L.	12	Least concern	0	0	0	0	0	0	0	0	0	0	0	0	0	1	1	0	0	0	0	0	0	0	0	0	0	0	0	0	0	0	0	0	0	0	0	0	0	0	0	0	0	0	0	0
Fagales	Fagaceae	Quercus palustris	L.	18	Least concern	1	0	0	0	1	1	0	0	0	0	0	0	0	1	0	0	0	0	0	0	0	0	0	0	0	0	0	0	0	0	0	0	0	0	0	0	0	0	0	0	0	0	0	0
Fagales	Fagaceae	Quercus petraea	L. ex Liebl.	2	Least concern	0	0	0	0	0	0	0	1	0	0	0	1	0	0	0	0	0	0	0	0	0	0	0	0	0	0	0	0	0	0	0	0	0	0	0	0	0	0	0	0	0	0	0	0
Fagales	Fagaceae	Quercus prinus	L.	1	Least concern	0	0	0	0	0	0	0	0	0	0	0	0	0	1	0	0	0	0	0	0	0	0	0	0	0	0	0	0	0	0	0	0	0	0	0	0	0	0	0	0	0	0	0	0
Fagales	Fagaceae	Quercus robur	L.	28	Least concern	1	0	1	0	1	1	0	1	0	0	0	1	0	0	0	0	0	0	0	0	0	0	0	0	0	0	0	0	0	0	0	0	0	0	0	0	0	0	0	0	0	0	0	0
Fagales	Fagaceae	Quercus rubra	L.	5	Least concern	0	0	1	0	1	0	0	0	0	0	0	0	0	1	1	0	0	0	0	0	0	0	0	0	0	0	0	0	0	0	0	0	0	0	0	0	0	0	0	0	0	0	0	0
Fagales	Fagaceae	Quercus rugosa	Née	9	Least concern	0	0	0	0	1	0	0	0	0	0	0	0	0	0	0	1	0	0	0	0	0	0	0	0	0	0	0	0	0	0	0	1	0	0	0	0	0	0	0	0	0	0	0	0
Fagales	Fagaceae	Quercus serrata	Thunb.	2	Not assessed	0	0	0	0	0	0	0	0	0	1	0	0	0	0	0	0	0	0	0	0	0	0	0	0	0	0	0	0	0	0	0	0	0	0	0	0	0	0	0	0	0	0	0	0
Fagales	Fagaceae	Quercus suber	L.	15	Least concern	1	0	0	0	1	0	0	0	0	0	0	1	0	0	0	0	0	0	0	0	0	0	0	0	0	0	0	0	0	0	0	0	0	0	0	0	0	0	0	0	0	0	0	0
Fagales	Fagaceae	Quercus velutina	Lam.	2	Least concern	0	0	0	0	0	0	0	0	0	0	0	0	0	1	1	0	0	0	0	0	0	0	0	0	0	0	0	0	0	0	0	0	0	0	0	0	0	0	0	0	0	0	0	0
Fagales	Fagaceae	Quercus virginiana	Lam.	2	Least concern	0	0	0	0	1	0	0	0	0	0	0	0	0	1	1	0	0	0	0	0	0	0	0	0	0	0	0	0	0	0	0	0	0	0	0	0	0	0	0	0	0	0	0	0
Myrtales	Combretaceae	Quisqualis indica	L.	1	Not assessed	0	0	0	0	0	0	0	0	0	0	0	0	0	0	0	0	0	0	0	0	0	0	0	0	0	1	1	0	0	0	0	0	0	0	0	0	0	0	0	0	0	0	0	0
Ericales	Primulaceae	Rapanea gilliana	(Sond.) Mez	1	Vulnerable	0	0	0	0	0	0	0	0	0	0	0	0	0	0	0	0	0	0	0	0	0	1	0	0	0	0	0	0	0	0	0	0	0	0	0	0	0	0	0	0	0	0	0	0
Ericales	Primulaceae	Rapanea melanophloeos	(L.) Mez	17	Not assessed	0	0	0	0	1	0	0	0	0	0	0	0	0	0	0	0	0	0	0	0	1	1	0	0	0	0	0	0	0	0	0	0	0	0	0	0	0	0	0	0	0	0	0	0
Arecales	Arecaceae	Raphia australis	Oberm. & Strey	7	Vulnerable	0	0	0	0	0	0	0	0	0	0	0	0	0	0	0	0	0	0	0	0	0	1	0	0	0	0	0	0	0	0	0	0	0	0	0	0	0	0	0	0	0	0	0	0
Arecales	Arecaceae	Raphia farinifera	(Gaertn.) Hyl.	1	Least concern	0	0	0	0	0	0	0	0	0	0	0	0	0	0	0	0	0	0	0	1	1	0	0	0	0	0	0	0	0	0	0	0	0	0	0	0	0	0	0	0	0	0	0	0
Gentianales	Apocynaceae	Rauvolfia caffra	Sond.	21	Least concern	0	0	0	0	0	0	0	0	0	0	0	0	0	0	0	0	0	1	0	1	1	1	0	0	0	0	0	0	0	0	0	0	0	0	0	0	0	0	0	0	0	0	0	0
Zingiberales	Strelitziaceae	Ravenala madagascariensis	Sonn.	8	Not assessed	0	1	1	0	0	0	0	0	0	0	0	0	0	0	0	0	0	0	0	0	0	0	1	0	0	0	0	0	0	0	0	0	0	0	0	0	0	0	0	0	0	0	0	0
Malpighiales	Achariaceae	Rawsonia lucida	Harv. & Sond.	5	Least concern	0	0	0	0	0	0	0	0	0	0	0	0	0	0	0	0	0	0	0	0	1	1	0	0	0	0	0	0	0	0	0	0	0	0	0	0	0	0	0	0	0	0	0	0
Malvales	Sterculiaceae	Reevesia thyrsoidea	Lindl.	1	Least concern	0	0	0	0	0	0	0	0	0	0	0	0	0	0	0	0	0	0	0	0	0	0	0	0	1	0	0	0	0	0	0	0	0	0	0	0	0	0	0	0	0	0	0	0
Malpighiales	Euphorbiaceae	Reutealis trisperma	(Blanco) Airy Shaw	1	Vulnerable	0	0	0	0	0	0	0	0	0	0	0	0	0	0	0	0	0	0	0	0	0	0	0	0	0	0	1	0	0	0	0	0	0	0	0	0	0	0	0	0	0	0	0	0
Rosales	Rhamnaceae	Rhamnus cathartica	L.	1	Least concern	0	1	1	1	0	0	0	1	0	0	0	1	0	0	0	0	0	0	0	0	0	0	0	0	0	0	0	0	0	0	0	0	0	0	0	0	0	0	0	0	0	0	0	0
Rosales	Rhamnaceae	Rhamnus prinoides	L'Her.	9	Least concern	0	0	0	0	0	0	0	0	0	0	0	0	0	0	0	0	0	0	0	1	1	1	0	0	0	0	0	0	0	0	0	0	0	0	0	0	0	0	0	0	0	0	0	0
Rosales	Rosaceae	Rhaphiolepis indica	(L.) Lindl.	7	Least concern	0	0	0	0	0	0	0	0	0	1	0	0	0	0	0	0	0	0	0	0	0	0	0	0	0	1	0	0	0	0	0	0	0	0	0	0	0	0	0	0	0	0	0	0
Rosales	Rosaceae	Rhaphiolepis umbellata	(Thunb.) Makino	1	Not assessed	0	0	0	0	0	0	0	0	0	1	0	0	0	0	0	0	0	0	0	0	0	0	0	0	0	0	0	0	0	0	0	0	0	0	0	0	0	0	0	0	0	0	0	0
Rosales	Rosaceae	Rhaphiolepis x delacourii	André	1	Not assessed	0	0	0	0	0	0	0	0	0	0	0	0	0	0	0	0	0	0	0	0	0	0	0	0	0	0	0	0	0	0	0	0	0	0	0	0	0	0	0	0	0	0	0	0
Arecales	Arecaceae	Rhapis excelsa	(Thunb.) Henry	3	Not assessed	0	0	0	0	0	0	0	0	0	1	0	0	0	0	0	0	0	0	0	0	0	0	0	0	0	0	0	0	0	0	0	0	0	0	0	0	0	0	0	0	0	0	0	0
Malpighiales	Clusiaceae	Rheedia brasiliensis	(Mart.) Planch. & Triana	1	Not assessed	0	0	0	0	0	0	0	0	0	0	0	0	0	0	0	0	0	0	0	0	0	0	0	0	0	0	0	0	0	0	0	0	1	1	0	0	0	0	0	0	0	0	0	0
Lamiales	Bignoniaceae	Rhigozum brevispinosum	Kuntze	1	Least concern	0	0	0	0	0	0	0	0	0	0	0	0	0	0	0	0	0	0	0	0	0	1	0	0	0	0	0	0	0	0	0	0	0	0	0	0	0	0	0	0	0	0	0	0
Lamiales	Bignoniaceae	Rhigozum madagascariensis	Drake	1	Not assessed	0	0	0	0	0	0	0	0	0	0	0	0	0	0	0	0	0	0	0	0	0	0	1	0	0	0	0	0	0	0	0	0	0	0	0	0	0	0	0	0	0	0	0	0
Lamiales	Bignoniaceae	Rhigozum obovatum	Burch.	3	Least concern	0	0	0	0	0	0	0	0	0	0	0	0	0	0	0	0	0	0	0	0	0	1	0	0	0	0	0	0	0	0	0	0	0	0	0	0	0	0	0	0	0	0	0	0
Malpighiales	Rhizophoraceae	Rhizophora mucronata	Lam.	1	Least concern	0	0	0	0	0	0	0	0	0	0	0	0	0	0	0	0	0	0	1	1	1	1	0	0	1	1	1	0	0	0	0	0	0	0	0	0	0	0	0	1	0	0	0	0
Ericales	Ericaceae	Rhododendron arboreum	Sm.	2	Least concern	0	0	0	0	0	0	0	0	0	1	0	0	0	0	0	0	0	0	0	0	0	0	0	0	1	1	0	0	0	0	0	0	0	0	0	0	0	0	0	0	0	0	0	0
Ericales	Ericaceae	Rhododendron grande	Wight	1	Not assessed	0	0	0	0	0	0	0	0	0	1	0	0	0	0	0	0	0	0	0	0	0	0	0	0	0	0	0	0	0	0	0	0	0	0	0	0	0	0	0	0	0	0	0	0
Ericales	Ericaceae	Rhododendron indicum	Sweet	4	Not assessed	0	0	0	0	0	0	0	0	0	1	0	0	0	0	0	0	0	0	0	0	0	0	0	0	0	0	0	0	0	0	0	0	0	0	0	0	0	0	0	0	0	0	0	0
Ericales	Ericaceae	Rhododendron ponticum	L.	2	Not assessed	0	1	1	1	0	0	0	0	0	0	0	1	0	0	0	0	0	0	0	0	0	0	0	0	0	0	0	0	0	0	0	0	0	0	0	0	0	0	0	0	0	0	0	0
Ericales	Ericaceae	Rhododendron x pulchrum	Sweet	2	Not assessed	0	0	0	0	0	0	0	0	0	0	0	0	0	0	0	0	0	0	0	0	0	0	0	0	0	0	0	0	0	0	0	0	0	0	0	0	0	0	0	0	0	0	0	0
Myrtales	Myrtaceae	Rhodomyrtus tomentosa	(Aiton) Hassk.	1	Least concern	0	1	1	1	0	0	0	0	0	1	1	0	0	0	0	0	0	0	0	0	0	0	0	0	0	0	0	0	0	0	0	0	0	0	0	0	0	0	0	0	0	0	0	0
Sapindales	Anacardiaceae	Rhodosphaera rhodanthema	(F.Muell.) Engl.	1	Not assessed	0	0	0	0	0	0	0	0	0	0	0	0	0	0	0	0	0	0	0	0	0	0	0	0	0	0	0	0	0	0	0	0	0	0	0	0	0	0	0	1	0	0	0	0
Vitales	Vitaceae	Rhoicissus digitata	(L.f.) Gilg. & M.Brandt	1	Not assessed	0	0	0	0	0	0	0	0	0	0	0	0	0	0	0	0	0	0	0	0	0	1	0	0	0	0	0	0	0	0	0	0	0	0	0	0	0	0	0	0	0	0	0	0
Vitales	Vitaceae	Rhoicissus kougabergensis	Retief & Van Jaarsv.	1	Not assessed	0	0	0	0	0	0	0	0	0	0	0	0	0	0	0	0	0	0	0	0	0	1	0	0	0	0	0	0	0	0	0	0	0	0	0	0	0	0	0	0	0	0	0	0
Vitales	Vitaceae	Rhoicissus tomentosa	(Lam.) Wild & R.B.Drumm.	3	Not assessed	0	0	0	0	0	0	0	0	0	0	0	0	0	0	0	0	0	0	0	0	1	1	0	0	0	0	0	0	0	0	0	0	0	0	0	0	0	0	1	0	0	0	0	0
Vitales	Vitaceae	Rhoicissus tridentata	(L.f.) Wild & R.B.Drumm.	1	Least concern	0	0	0	0	0	0	0	0	0	0	0	0	0	0	0	0	0	0	0	0	0	1	0	0	0	0	0	0	0	0	0	0	0	0	0	0	0	0	0	0	0	0	0	0
Arecales	Arecaceae	Rhopalostylis sapida	H.Wendl. & Drude	1	Least concern	0	0	0	0	0	0	0	0	0	0	0	0	0	0	0	0	0	0	0	0	0	0	0	0	0	0	0	0	0	0	0	0	0	0	0	0	0	0	0	0	0	0	1	0
Myrtales	Penaeaceae	Rhynchocalyx lawsonioides	Oliv.	1	Vulnerable	0	0	0	0	0	0	0	0	0	0	0	0	0	0	0	0	0	0	0	0	0	1	0	0	0	0	0	0	0	0	0	0	0	0	0	0	0	0	0	0	0	0	0	0
Ericales	Ericaceae	Richea pandanifolia	Hook.f.	1	Not assessed	0	0	0	0	0	0	0	0	0	0	0	0	0	0	0	0	0	0	0	0	0	0	0	0	0	0	0	0	0	0	0	0	0	0	0	0	0	0	0	1	0	0	0	0
Malpighiales	Violaceae	Rinorea angustifolia	(Thouars) Baill.	1	Not assessed	0	0	0	0	0	0	0	0	0	0	0	0	0	0	0	0	0	0	0	0	0	1	0	0	0	0	0	0	0	0	0	0	0	0	0	0	0	0	0	0	0	0	0	0
Malpighiales	Violaceae	Rinorea angustifolia subsp. natalensis	(Engl.) Grey-Wilson	1	Not assessed	0	0	0	0	0	0	0	0	0	0	0	0	0	0	0	0	0	0	0	0	0	1	0	0	0	0	0	0	0	0	0	0	0	0	0	0	0	0	0	0	0	0	0	0
Fabales	Fabaceae	Robinia pseudoacacia	L.	3	Not assessed	1	1	1	1	1	0	0	0	0	0	0	0	0	1	1	0	0	0	0	0	0	0	0	0	0	0	0	0	0	0	0	0	0	0	0	0	0	0	0	0	0	0	0	0
Fabales	Fabaceae	Robinia pseudoacacia cv. 'Umbraculifera'	L.	2	NA	0	0	0	0	0	0	0	0	0	0	0	0	0	0	0	0	0	0	0	0	0	0	0	0	0	0	0	0	0	0	0	0	0	0	0	0	0	0	0	0	0	0	0	0
Celastrales	Celastraceae	Robsonodendron eucleiforme	(Eckl. & Zeyh.) R.H.Archer	1	Least concern	0	0	0	0	0	0	0	0	0	0	0	0	0	0	0	0	0	0	0	0	0	1	0	0	0	0	0	0	0	0	0	0	0	0	0	0	0	0	1	0	0	0	0	0
Gentianales	Rubiaceae	Rogiera amoena	(Planch.) Hemsl.	1	Least concern	0	0	0	0	0	0	0	0	0	0	0	0	0	0	0	0	0	0	0	0	0	0	0	0	0	0	0	0	0	0	0	1	0	0	0	0	0	0	0	0	0	0	0	0
Rosales	Rosaceae	Rosa banksiae	W.T. Aiton	2	Not assessed	0	0	0	0	0	0	0	0	0	1	0	0	0	0	0	0	0	0	0	0	0	0	0	0	0	0	0	0	0	0	0	0	0	0	0	0	0	0	0	0	0	0	0	0
Rosales	Rosaceae	Rosa canina	L.	1	Least concern	0	1	1	0	0	0	0	1	0	0	0	0	0	0	0	0	0	0	0	0	0	0	0	0	0	0	0	0	0	0	0	0	0	0	0	0	0	0	0	0	0	0	0	0
Rosales	Rosaceae	Rosa chinensis cv. 'Viridflora'	Jacq.	1	NA	0	0	0	0	0	0	0	0	0	0	0	0	0	0	0	0	0	0	0	0	0	0	0	0	0	0	0	0	0	0	0	0	0	0	0	0	0	0	0	0	0	0	0	0
Rosales	Rosaceae	Rosa cv. 'Amy's Rose'	NA	1	NA	0	0	0	0	0	0	0	0	0	0	0	0	0	0	0	0	0	0	0	0	0	0	0	0	0	0	0	0	0	0	0	0	0	0	0	0	0	0	0	0	0	0	0	0
Rosales	Rosaceae	Rosa cv. 'Archbishop Desmond Tutu'	NA	1	NA	0	0	0	0	0	0	0	0	0	0	0	0	0	0	0	0	0	0	0	0	0	0	0	0	0	0	0	0	0	0	0	0	0	0	0	0	0	0	0	0	0	0	0	0
Rosales	Rosaceae	Rosa cv. 'Clocolan'	NA	1	NA	0	0	0	0	0	0	0	0	0	0	0	0	0	0	0	0	0	0	0	0	0	0	0	0	0	0	0	0	0	0	0	0	0	0	0	0	0	0	0	0	0	0	0	0
Rosales	Rosaceae	Rosa cv. 'Garden and Home'	NA	1	NA	0	0	0	0	0	0	0	0	0	0	0	0	0	0	0	0	0	0	0	0	0	0	0	0	0	0	0	0	0	0	0	0	0	0	0	0	0	0	0	0	0	0	0	0
Rosales	Rosaceae	Rosa cv. 'Knysna'	NA	1	NA	0	0	0	0	0	0	0	0	0	0	0	0	0	0	0	0	0	0	0	0	0	0	0	0	0	0	0	0	0	0	0	0	0	0	0	0	0	0	0	0	0	0	0	0
Rosales	Rosaceae	Rosa cv. 'Paul Roos'	NA	1	NA	0	0	0	0	0	0	0	0	0	0	0	0	0	0	0	0	0	0	0	0	0	0	0	0	0	0	0	0	0	0	0	0	0	0	0	0	0	0	0	0	0	0	0	0
Rosales	Rosaceae	Rosa cv. 'Pink Ayoba'	NA	1	NA	0	0	0	0	0	0	0	0	0	0	0	0	0	0	0	0	0	0	0	0	0	0	0	0	0	0	0	0	0	0	0	0	0	0	0	0	0	0	0	0	0	0	0	0
Rosales	Rosaceae	Rosa cv. 'Rainbow Nation'	NA	1	NA	0	0	0	0	0	0	0	0	0	0	0	0	0	0	0	0	0	0	0	0	0	0	0	0	0	0	0	0	0	0	0	0	0	0	0	0	0	0	0	0	0	0	0	0
Rosales	Rosaceae	Rosa cv. 'South Africa'	NA	1	NA	0	0	0	0	0	0	0	0	0	0	0	0	0	0	0	0	0	0	0	0	0	0	0	0	0	0	0	0	0	0	0	0	0	0	0	0	0	0	0	0	0	0	0	0
Rosales	Rosaceae	Rosa roxburghii cv. 'Plena'	NA	1	NA	0	0	0	0	0	0	0	0	0	0	0	0	0	0	0	0	0	0	0	0	0	0	0	0	0	0	0	0	0	0	0	0	0	0	0	0	0	0	0	0	0	0	0	0
Rosales	Rosaceae	Rosa rubiginosa	L.	1	Not assessed	1	1	1	0	0	0	0	1	1	0	1	1	0	0	0	0	0	0	0	0	0	0	0	0	0	0	0	0	0	0	0	0	0	0	0	0	0	0	0	0	0	0	0	0
Lamiales	Bignoniaceae	Rosea donell-smithii	(Rose) Miranda	1	Least concern	0	0	0	0	0	0	0	0	0	0	0	0	0	0	0	0	0	0	0	0	0	0	0	0	0	0	0	0	0	0	0	1	1	0	0	0	0	0	0	0	0	0	0	0
Lamiales	Bignoniaceae	Roseodendron donnell-smithii	(Rose) Miranda	1	Not assessed	0	0	0	0	0	0	0	0	0	0	0	0	0	0	0	0	0	0	0	0	0	0	0	0	0	0	0	0	0	0	0	1	0	0	0	0	0	0	0	0	0	0	0	0
Lamiales	Lamiaceae	Rotheca myricoides	(Hochst.) Stean & Mabb.	3	Least concern	0	0	0	0	0	0	0	0	0	0	0	0	0	0	0	0	0	0	0	0	1	0	0	0	0	0	0	0	0	0	0	0	0	0	0	0	0	0	0	0	0	0	0	0
Lamiales	Verbenaceae	Rotheca myricoides cv. 'Ugandense'	(Hochst.) Steane & Mabb.	2	NA	0	0	0	0	0	0	0	0	0	0	0	0	0	0	0	0	0	0	0	0	0	0	0	0	0	0	0	0	0	0	0	0	0	0	0	0	0	0	0	0	0	0	0	0
Gentianales	Rubiaceae	Rothmannia capensis	Thunb.	6	Not assessed	0	0	0	0	0	0	0	0	0	0	0	0	0	0	0	0	0	0	0	0	0	1	0	0	0	0	0	0	0	0	0	0	0	0	0	0	0	0	0	0	0	0	0	0
Gentianales	Rubiaceae	Rothmannia fischeri	(K.Schum.) Bullock	2	Not assessed	0	0	0	0	0	0	0	0	0	0	0	0	0	0	0	0	0	0	0	0	1	1	0	0	0	0	0	0	0	0	0	0	0	0	0	0	0	0	0	0	0	0	0	0
Gentianales	Rubiaceae	Rothmannia fischeri subsp. moramballae	(Hiern) Bridson	1	Not assessed	0	0	0	0	0	0	0	0	0	0	0	0	0	0	0	0	0	0	0	0	0	1	0	0	0	0	0	0	0	0	0	0	0	0	0	0	0	0	0	0	0	0	0	0
Gentianales	Rubiaceae	Rothmannia globosa	(Hochst.) Keay	10	Not assessed	0	0	0	0	0	0	0	0	0	0	0	0	0	0	0	0	0	0	0	0	0	1	0	0	0	0	0	0	0	0	0	0	0	0	0	0	0	0	0	0	0	0	0	0
Gentianales	Rubiaceae	Rothmannia manganjae	(Hiern) Keay	3	Not assessed	0	0	0	0	0	0	0	0	0	0	0	0	0	0	0	0	0	0	0	0	1	0	0	0	0	0	0	0	0	0	0	0	0	0	0	0	0	0	0	0	0	0	0	0
Gentianales	Rubiaceae	Rothmannia urcelliformis	(Schweinf. ex Hiern) Bullock ex Robyns	1	Least concern	0	0	0	0	0	0	0	0	0	0	0	0	0	0	0	0	0	1	0	1	1	0	0	0	0	0	0	0	0	0	0	0	0	0	0	0	0	0	0	0	0	0	0	0
Arecales	Arecaceae	Roystonea borinquena	O.F.Cook	1	Not assessed	0	0	0	0	0	0	0	0	0	0	0	0	0	0	0	0	0	0	0	0	0	0	0	0	0	0	0	0	0	0	0	1	0	0	0	0	0	0	0	0	0	0	0	0
Arecales	Arecaceae	Roystonea regia	(Kunth) O.F.Cook	6	Not assessed	0	0	1	0	0	0	0	0	0	0	0	0	0	0	0	0	0	0	0	0	0	0	0	0	0	0	0	0	0	0	0	1	0	0	0	0	0	0	0	0	0	0	0	0
Rosales	Rosaceae	Rubus fruticosus	L.	1	Not assessed	0	1	1	0	0	0	0	0	0	0	0	0	0	0	0	0	0	0	0	0	0	1	0	0	0	0	0	0	0	0	0	0	0	0	0	0	0	0	1	0	0	0	0	0
Rosales	Rosaceae	Rubus fruticosus cv. 'Waldo'	L.	1	NA	0	0	0	0	0	0	0	0	0	0	0	0	0	0	0	0	0	0	0	0	0	0	0	0	0	0	0	0	0	0	0	0	0	0	0	0	0	0	0	0	0	0	0	0
Rosales	Rosaceae	Rubus idaeus	L.	1	Least concern	0	0	1	0	0	0	0	1	0	0	0	0	0	0	0	0	0	0	0	0	0	0	0	0	0	0	0	0	0	0	0	0	0	0	0	0	0	0	0	0	0	0	0	0
Asterales	Asteraceae	Rudbeckia lacinata cv. 'Herbstonne'	L.	1	NA	0	0	0	0	0	0	0	0	0	0	0	0	0	0	0	0	0	0	0	0	0	0	0	0	0	0	0	0	0	0	0	0	0	0	0	0	0	0	0	0	0	0	0	0
Caryophyllales	Polygonaceae	Ruprechtia coriacea	(H.Karst.) Benth. & Hook.f. ex B.D.Jacks	1	Not assessed	0	0	0	0	0	0	0	0	0	0	0	0	0	0	0	0	0	0	0	0	0	0	0	0	0	0	0	0	0	0	0	0	1	0	0	0	0	0	0	0	0	0	0	0
Lamiales	Acanthaceae	Ruttya fruticosa	Lindau	1	Not assessed	0	0	0	0	0	0	0	0	0	0	0	0	0	0	0	0	1	0	1	0	1	0	0	0	0	0	0	0	0	0	0	0	0	0	0	0	0	0	0	0	0	0	0	0
Arecales	Arecaceae	Sabal bermudana	L.H.Bailey	1	Endangered	0	0	0	0	0	0	0	0	0	0	0	0	0	0	0	0	0	0	0	0	0	0	0	0	0	0	0	0	0	0	0	1	0	0	0	0	0	0	0	0	0	0	0	0
Arecales	Arecaceae	Sabal mexicana	Mart.	2	Not assessed	0	0	0	0	0	0	0	0	0	0	0	0	0	0	0	0	0	0	0	0	0	0	0	0	0	0	0	0	0	0	0	1	0	0	0	0	0	0	0	0	0	0	0	0
Arecales	Arecaceae	Sabal minor	(Jacq.) Pers.	2	Least concern	0	0	0	0	0	0	0	0	0	0	0	0	0	0	1	0	0	0	0	0	0	0	0	0	0	0	0	0	0	0	0	0	0	0	0	0	0	0	0	0	0	0	0	0
Arecales	Arecaceae	Sabal palmetto	(Walter) Lodd. ex Schult. & Schult.f.	5	Least concern	0	0	0	0	0	0	0	0	0	0	0	0	0	0	0	0	0	0	0	0	0	0	0	0	0	0	0	0	0	0	0	1	0	0	0	0	0	0	0	0	0	0	0	0
Malpighiales	Salicaceae	Salix alba	L.	1	Least concern	0	0	1	0	1	1	0	1	1	1	1	0	0	0	0	0	0	0	0	0	0	0	0	0	0	0	0	0	0	0	0	0	0	0	0	0	0	0	0	0	0	0	0	0
Malpighiales	Salicaceae	Salix babylonica	L.	10	Not assessed	1	1	1	1	1	0	0	0	0	1	0	0	0	0	0	0	0	0	0	0	0	0	0	0	0	0	0	0	0	0	0	0	0	0	0	0	0	0	0	0	0	0	0	0
Malpighiales	Salicaceae	Salix mucronata	Thunb.	12	Not assessed	0	0	0	0	1	1	0	0	0	0	0	0	0	0	0	0	0	0	0	0	1	1	0	0	0	0	0	0	0	0	0	0	0	0	0	0	0	0	1	0	0	0	0	0
Malpighiales	Salicaceae	Salix mucronata subsp. hirsuta	(Thunb.) Immelman	2	Not assessed	0	0	0	0	0	0	0	0	0	0	0	0	0	0	0	0	0	0	0	0	0	0	0	0	0	0	0	0	0	0	0	0	0	0	0	0	0	0	1	0	0	0	0	0
Malpighiales	Salicaceae	Salix mucronata subsp. subserrata	(Willd.) R.H. Archer & Jordaan	1	Not assessed	0	0	0	0	0	0	0	0	0	0	0	0	0	0	0	0	1	1	0	1	1	1	0	0	0	0	0	0	0	0	0	0	0	0	0	0	0	0	0	0	0	0	0	0
Malpighiales	Salicaceae	Salix mucronata subsp. woodii	(Seemen) Immelman	1	Not assessed	0	0	0	0	0	0	0	0	0	0	0	0	0	0	0	0	0	0	0	0	0	1	0	0	0	0	0	0	0	0	0	0	0	0	0	0	0	0	0	0	0	0	0	0
Dipsacales	Adoxaceae	Sambucus nigra	L.	1	Not assessed	1	0	1	0	0	0	0	1	0	0	0	1	0	0	0	0	0	0	0	0	0	0	0	0	0	0	0	0	0	0	0	0	0	0	0	0	0	0	0	0	0	0	0	0
Dipsacales	Adoxaceae	Sambucus nigra cv. 'Variegata'	L.	1	NA	0	0	0	0	0	0	0	0	0	0	0	0	0	0	0	0	0	0	0	0	0	0	0	0	0	0	0	0	0	0	0	0	0	0	0	0	0	0	0	0	0	0	0	0
Dipsacales	Adoxaceae	Sambucus racemosa	L.	1	Least concern	0	0	1	0	0	0	0	1	0	0	0	1	0	1	1	0	0	0	0	0	0	0	0	0	0	0	0	0	0	0	0	0	0	0	0	0	0	0	0	0	0	0	0	0
Myrtales	Myrtaceae	Sannantha pluriflora	(F.Muell.) Peter G.Wilson	1	Least concern	0	0	0	0	0	0	0	0	0	0	0	0	0	0	0	0	0	0	0	0	0	0	0	0	0	0	0	0	0	0	0	0	0	0	0	0	0	0	0	1	0	0	0	0
Myrtales	Myrtaceae	Sannantha virgata	(J.R.Forst. & G.Forst) Peter G. Wilson	1	Not assessed	0	0	0	0	0	0	0	0	0	0	0	0	0	0	0	0	0	0	0	0	0	0	0	0	0	0	0	0	1	0	0	0	0	0	0	0	0	0	0	0	0	0	0	0
Santalales	Santalaceae	Santalum album	L.	2	Vulnerable	0	0	1	0	0	0	0	0	0	0	0	0	0	0	0	0	0	0	0	0	0	0	0	0	0	1	0	0	0	0	0	0	0	0	0	0	0	0	0	0	0	0	0	0
Fabales	Fabaceae	Saphora japonica	L.	1	Not assessed	0	0	0	0	0	0	0	0	0	1	0	0	0	0	0	0	0	0	0	0	0	0	0	0	0	0	0	0	0	0	0	0	0	0	0	0	0	0	0	0	0	0	0	0
Sapindales	Sapindaceae	Sapindus marginatus	Willd.	1	Not assessed	0	0	0	0	0	0	0	0	0	0	0	0	0	0	1	0	0	0	0	0	0	0	0	0	0	0	0	0	0	0	0	0	0	0	0	0	0	0	0	0	0	0	0	0
Sapindales	Sapindaceae	Sapindus saponaria	L.	2	Not assessed	0	0	1	0	0	0	0	0	0	1	0	0	0	0	0	0	0	0	0	0	0	0	0	0	0	1	0	0	0	0	0	0	0	0	0	0	0	0	0	0	0	0	0	0
Malpighiales	Euphorbiaceae	Sapium integerrimum	(Hochst.) J.Léonard	2	Not assessed	0	0	0	0	0	0	0	0	0	0	0	0	0	0	0	0	0	0	0	0	0	1	0	0	0	0	0	0	0	0	0	0	0	0	0	0	0	0	0	0	0	0	0	0
Fabales	Fabaceae	Saraca indica	L.	1	Not assessed	0	0	0	0	0	0	0	0	0	0	0	0	0	0	0	0	0	0	0	0	0	0	0	0	0	1	1	0	0	0	0	0	0	0	0	0	0	0	0	0	0	0	0	0
Sapindales	Anacardiaceae	Schinus molle	L.	15	Not assessed	1	1	1	0	1	0	0	0	0	0	0	0	0	0	0	0	0	0	0	0	0	0	0	0	0	0	0	0	0	0	0	0	0	0	1	1	1	0	0	0	0	0	0	0
Sapindales	Anacardiaceae	Schinus terebinthifolia	Raddi	6	Not assessed	1	1	1	1	1	0	0	0	0	0	0	0	0	0	0	0	0	0	0	0	0	0	0	0	0	0	0	0	0	0	0	0	0	0	1	0	1	0	0	0	0	0	0	0
Malpighiales	Euphorbiaceae	Schinziophyton rautanenii	(Schinz) Radcl.-Sm.	2	Least concern	0	0	0	0	0	0	0	0	0	0	0	0	0	0	0	0	0	0	0	1	1	0	0	0	0	0	0	0	0	0	0	0	0	0	0	0	0	0	0	0	0	0	0	0
Fabales	Fabaceae	Schizolobium parahyba	(Vell.) Blake	4	Not assessed	1	0	1	0	0	0	0	0	0	0	0	0	0	0	0	0	0	0	0	0	0	0	0	0	0	0	0	0	0	0	0	1	1	1	0	0	0	0	0	0	0	0	0	0
Fabales	Fabaceae	Schotia afra	(L.) Thunb.	8	Least concern	0	0	0	0	0	0	0	0	0	0	0	0	0	0	0	0	0	0	0	0	0	1	0	0	0	0	0	0	0	0	0	0	0	0	0	0	0	0	0	0	0	0	0	0
Fabales	Fabaceae	Schotia afra var. angustifolia	(E.Mey.) Harv.	2	Least concern	0	0	0	0	0	0	0	0	0	0	0	0	0	0	0	0	0	0	0	0	0	1	0	0	0	0	0	0	0	0	0	0	0	0	0	0	0	0	0	0	0	0	0	0
Fabales	Fabaceae	Schotia brachypetala	Sond.	28	Not assessed	0	0	0	0	1	0	0	0	0	0	0	0	0	0	0	0	0	0	0	0	1	1	0	0	0	0	0	0	0	0	0	0	0	0	0	0	0	0	0	0	0	0	0	0
Fabales	Fabaceae	Schotia capitata	Bolle	1	Not assessed	0	0	0	0	0	0	0	0	0	0	0	0	0	0	0	0	0	0	0	0	0	1	0	0	0	0	0	0	0	0	0	0	0	0	0	0	0	0	0	0	0	0	0	0
Fabales	Fabaceae	Schotia latifolia	Jacq.	5	Not assessed	0	0	0	0	0	0	0	0	0	0	0	0	0	0	0	0	0	0	0	0	0	1	0	0	0	0	0	0	0	0	0	0	0	0	0	0	0	0	0	0	0	0	0	0
Lamiales	Oleaceae	Schrebera alata	(Hochst.) Welw.	7	Least concern	0	0	0	0	0	0	0	0	0	0	0	0	0	0	0	0	0	0	1	1	1	1	0	0	0	0	0	0	0	0	0	0	0	0	0	0	0	0	0	0	0	0	0	0
Sapindales	Anacardiaceae	Sclerocarya birrea subsp. caffra	(Sond.) Kokwaro	13	Not assessed	0	0	0	0	0	0	0	0	0	0	0	0	0	0	0	0	0	0	0	0	1	1	0	0	0	0	0	0	0	0	0	0	0	0	0	0	0	0	0	0	0	0	0	0
Lamiales	Acanthaceae	Sclerochiton harveyanus	Nees	2	Not assessed	0	0	0	0	0	0	0	0	0	0	0	0	0	0	0	0	0	0	0	0	0	1	0	0	0	0	0	0	0	0	0	0	0	0	0	0	0	0	0	0	0	0	0	0
Lamiales	Acanthaceae	Sclerochiton ilicifolius	A.Meeuse	1	Not assessed	0	0	0	0	0	0	0	0	0	0	0	0	0	0	0	0	0	0	0	0	0	1	0	0	0	0	0	0	0	0	0	0	0	0	0	0	0	0	0	0	0	0	0	0
Malpighiales	Euphorbiaceae	Sclerocroton integerrimus	Hochst.	1	Not assessed	0	0	0	0	0	0	0	0	0	0	0	0	0	0	0	0	0	0	0	0	1	1	0	0	0	0	0	0	0	0	0	0	0	0	0	0	0	0	1	0	0	0	0	0
Malpighiales	Salicaceae	Scolopia mundii	Warb.	3	Not assessed	0	0	0	0	0	0	0	0	0	0	0	0	0	0	0	0	0	0	0	0	0	1	0	0	0	0	0	0	0	0	0	0	0	0	0	0	0	0	1	0	0	0	0	0
Malpighiales	Salicaceae	Scolopia zeyheri	(Nees) Harv.	4	Not assessed	0	0	0	0	0	0	0	0	0	0	0	0	0	0	0	0	0	0	0	0	1	1	0	0	0	0	0	0	0	0	0	0	0	0	0	0	0	0	1	0	0	0	0	0
Rosales	Rhamnaceae	Scutia myrtina	(Burm. f.) Kurz	4	Least concern	0	0	0	0	0	0	0	0	0	0	0	0	0	0	0	0	0	0	0	1	1	1	1	0	1	0	0	0	0	0	0	0	0	0	0	0	0	0	0	0	0	0	0	0
Sapindales	Anacardiaceae	Searsia acocksii	(Moffett) Moffett	1	Not assessed	0	0	0	0	0	0	0	0	0	0	0	0	0	0	0	0	0	0	0	0	0	1	0	0	0	0	0	0	0	0	0	0	0	0	0	0	0	0	0	0	0	0	0	0
Sapindales	Anacardiaceae	Searsia angustifolia	(L.) F.A.Barkley	1	Least concern	0	0	0	0	0	0	0	0	0	0	0	0	0	0	0	0	0	0	0	0	0	1	0	0	0	0	0	0	0	0	0	0	0	0	0	0	0	0	1	0	0	0	0	0
Sapindales	Anacardiaceae	Searsia batophylla	(Codd) Moffett	5	Not assessed	0	0	0	0	0	0	0	0	0	0	0	0	0	0	0	0	0	0	0	0	0	1	0	0	0	0	0	0	0	0	0	0	0	0	0	0	0	0	0	0	0	0	0	0
Sapindales	Anacardiaceae	Searsia burchellii	(Sond. ex Engl.) Moffett	3	Least concern	0	0	0	0	0	0	0	0	0	0	0	0	0	0	0	0	0	0	0	0	0	1	0	0	0	0	0	0	0	0	0	0	0	0	0	0	0	0	1	0	0	0	0	0
Sapindales	Anacardiaceae	Searsia carnosula	(Schönland) Moffett	1	Not assessed	0	0	0	0	0	0	0	0	0	0	0	0	0	0	0	0	0	0	0	0	0	1	0	0	0	0	0	0	0	0	0	0	0	0	0	0	0	0	0	0	0	0	0	0
Sapindales	Anacardiaceae	Searsia chirindensis	(Baker.f.) Moffett	12	Least concern	0	0	0	0	1	0	0	0	0	0	0	0	0	0	0	0	0	0	0	0	1	1	0	0	0	0	0	0	0	0	0	0	0	0	0	0	0	0	0	0	0	0	0	0
Sapindales	Anacardiaceae	Searsia ciliata	(Licht. ex Schult.) A.J.Mill.	1	Not assessed	0	0	0	0	0	0	0	0	0	0	0	0	0	0	0	0	0	0	0	0	0	1	0	0	0	0	0	0	0	0	0	0	0	0	0	0	0	0	0	0	0	0	0	0
Sapindales	Anacardiaceae	Searsia crenata	(Thunb.) Moffett	6	Least concern	0	0	0	0	0	0	0	0	0	0	0	0	0	0	0	0	0	0	0	0	0	1	0	0	0	0	0	0	0	0	0	0	0	0	0	0	0	0	1	0	0	0	0	0
Sapindales	Anacardiaceae	Searsia dentata	(Thunb.) F.A.Barkley	9	Least concern	0	0	0	0	0	0	0	0	0	0	0	0	0	0	0	0	0	0	0	0	0	1	0	0	0	0	0	0	0	0	0	0	0	0	0	0	0	0	0	0	0	0	0	0
Sapindales	Anacardiaceae	Searsia discolor	(E.Mey. ex Sond.) Moffett	3	Not assessed	0	0	0	0	0	0	0	0	0	0	0	0	0	0	0	0	0	0	0	0	0	1	0	0	0	0	0	0	0	0	0	0	0	0	0	0	0	0	0	0	0	0	0	0
Sapindales	Anacardiaceae	Searsia englerii	(Britten) Moffett	1	Not assessed	0	0	0	0	0	0	0	0	0	0	0	0	0	0	0	0	0	0	0	0	0	1	0	0	0	0	0	0	0	0	0	0	0	0	0	0	0	0	0	0	0	0	0	0
Sapindales	Anacardiaceae	Searsia erosa	(Thunb.) Moffett	4	Not assessed	0	0	0	0	0	0	0	0	0	0	0	0	0	0	0	0	0	0	0	0	0	1	0	0	0	0	0	0	0	0	0	0	0	0	0	0	0	0	0	0	0	0	0	0
Sapindales	Anacardiaceae	Searsia gerrardii	(Harv. ex Engl.) Moffett	3	Not assessed	0	0	0	0	0	0	0	0	0	0	0	0	0	0	0	0	0	0	0	0	0	1	0	0	0	0	0	0	0	0	0	0	0	0	0	0	0	0	0	0	0	0	0	0
Sapindales	Anacardiaceae	Searsia glauca	(Thunb.) Moffett	5	Least concern	0	0	0	0	0	0	0	0	0	0	0	0	0	0	0	0	0	0	0	0	0	1	0	0	0	0	0	0	0	0	0	0	0	0	0	0	0	0	0	0	0	0	0	0
Sapindales	Anacardiaceae	Searsia gueinzii	(Sond.) F.A.Barkley	4	Least concern	0	0	0	0	0	0	0	0	0	0	0	0	0	0	0	0	0	0	0	0	1	1	0	0	0	0	0	0	0	0	0	0	0	0	0	0	0	0	0	0	0	0	0	0
Sapindales	Anacardiaceae	Searsia incisa var. incisa	(L.) F.A.Barkley	1	Least concern	0	0	0	0	0	0	0	0	0	0	0	0	0	0	0	0	0	0	0	0	0	1	0	0	0	0	0	0	0	0	0	0	0	0	0	0	0	0	0	0	0	0	0	0
Sapindales	Anacardiaceae	Searsia laevigata	(L.) F.A. Barkley	2	Not assessed	0	0	0	0	0	0	0	0	0	0	0	0	0	0	0	0	0	0	0	0	0	1	0	0	0	0	0	0	0	0	0	0	0	0	0	0	0	0	0	0	0	0	0	0
Sapindales	Anacardiaceae	Searsia lancea	(L.f.) F.A.Barkley	28	Least concern	0	0	1	0	1	0	0	0	0	0	0	0	0	0	0	0	0	0	0	0	0	1	0	0	0	0	0	0	0	0	0	0	0	0	0	0	0	0	1	0	0	0	0	0
Sapindales	Anacardiaceae	Searsia leptodictya	(Diels) T.S.Yi, A.J.Mill. & J.Wen.	12	Least concern	0	0	0	0	0	0	0	0	0	0	0	0	0	0	0	0	0	0	0	0	1	1	0	0	0	0	0	0	0	0	0	0	0	0	0	0	0	0	0	0	0	0	0	0
Sapindales	Anacardiaceae	Searsia longispina	(Eckl. & Zeyh.) Moffett	1	Least concern	0	0	0	0	0	0	0	0	0	0	0	0	0	0	0	0	0	0	0	0	0	1	0	0	0	0	0	0	0	0	0	0	0	0	0	0	0	0	1	0	0	0	0	0
Sapindales	Anacardiaceae	Searsia lucida	(L.) F.A.Barkley	4	Not assessed	0	0	0	0	0	0	0	0	0	0	0	0	0	0	0	0	0	0	0	0	0	1	0	0	0	0	0	0	0	0	0	0	0	0	0	0	0	0	0	0	0	0	0	0
Sapindales	Anacardiaceae	Searsia magaliesmontana subsp. coddii	(R.Fern. & A.Fern.) Moffett	1	Not assessed	0	0	0	0	0	0	0	0	0	0	0	0	0	0	0	0	0	0	0	0	0	1	0	0	0	0	0	0	0	0	0	0	0	0	0	0	0	0	0	0	0	0	0	0
Sapindales	Anacardiaceae	Searsia magalismontana	(Sond.) Moffett	2	Not assessed	0	0	0	0	0	0	0	0	0	0	0	0	0	0	0	0	0	0	0	0	0	1	0	0	0	0	0	0	0	0	0	0	0	0	0	0	0	0	0	0	0	0	0	0
Sapindales	Anacardiaceae	Searsia natalensis	(Bernh. ex Krauss) F.A.Barkley	1	Least concern	0	0	0	0	0	0	0	0	0	0	0	0	0	0	0	0	0	0	0	0	0	1	0	0	0	0	0	0	0	0	0	0	0	0	0	0	0	0	0	0	0	0	0	0
Sapindales	Anacardiaceae	Searsia nebulosa	(Schönland) Moffett	2	Least concern	0	0	0	0	0	0	0	0	0	0	0	0	0	0	0	0	0	0	0	0	0	1	0	0	0	0	0	0	0	0	0	0	0	0	0	0	0	0	0	0	0	0	0	0
Sapindales	Anacardiaceae	Searsia pendulina	(Jacq.) Moffett	17	Not assessed	0	0	1	0	0	0	0	0	0	0	0	0	0	0	0	0	0	0	0	0	0	1	0	0	0	0	0	0	0	0	0	0	0	0	0	0	0	0	0	0	0	0	0	0
Sapindales	Anacardiaceae	Searsia pentheri	(Zahlbr.) Moffett	3	Not assessed	0	0	0	0	0	0	0	0	0	0	0	0	0	0	0	0	0	0	0	0	0	1	0	0	0	0	0	0	0	0	0	0	0	0	0	0	0	0	0	0	0	0	0	0
Sapindales	Anacardiaceae	Searsia pondoensis	(Burch.) Moffett	1	Least concern	0	0	0	0	0	0	0	0	0	0	0	0	0	0	0	0	0	0	0	0	1	1	0	0	0	0	0	0	0	0	0	0	0	0	0	0	0	0	0	0	0	0	0	0
Sapindales	Anacardiaceae	Searsia pyroides	(Burch.) Moffett	9	Least concern	0	0	0	0	0	0	0	0	0	0	0	0	0	0	0	0	0	0	0	0	1	1	0	0	0	0	0	0	0	0	0	0	0	0	0	0	0	0	0	0	0	0	0	0
Sapindales	Anacardiaceae	Searsia rigida	(Mill.) F.A.Barkley	1	Least concern	0	0	0	0	0	0	0	0	0	0	0	0	0	0	0	0	0	0	0	0	0	1	0	0	0	0	0	0	0	0	0	0	0	0	0	0	0	0	0	0	0	0	0	0
Sapindales	Anacardiaceae	Searsia rosmarinifolia	(Vakl) F.A.Barkley	1	Not assessed	0	0	0	0	0	0	0	0	0	0	0	0	0	0	0	0	0	0	0	0	0	1	0	0	0	0	0	0	0	0	0	0	0	0	0	0	0	0	1	0	0	0	0	0
Sapindales	Anacardiaceae	Searsia scytophylla	(Eckl. & Zeyh.) Moffett	1	Not assessed	0	0	0	0	0	0	0	0	0	0	0	0	0	0	0	0	0	0	0	0	0	0	0	0	0	0	0	0	0	0	0	0	0	0	0	0	0	0	1	0	0	0	0	0
Sapindales	Anacardiaceae	Searsia tomentosa	(L.) F.A.Barkley	3	Least concern	0	0	0	0	0	0	0	0	0	0	0	0	0	0	0	0	0	0	0	0	0	1	0	0	0	0	0	0	0	0	0	0	0	0	0	0	0	0	1	0	0	0	0	0
Sapindales	Anacardiaceae	Searsia transvaalensis	(Engl.) Moffett	2	Least concern	0	0	0	0	0	0	0	0	0	0	0	0	0	0	0	0	0	0	0	0	0	1	0	0	0	0	0	0	0	0	0	0	0	0	0	0	0	0	0	0	0	0	0	0
Sapindales	Anacardiaceae	Searsia tumulicola	(S.Moore) Moffett	1	Least concern	0	0	0	0	0	0	0	0	0	0	0	0	0	0	0	0	0	0	0	0	0	1	0	0	0	0	0	0	0	0	0	0	0	0	0	0	0	0	0	0	0	0	0	0
Sapindales	Anacardiaceae	Searsia undulata	(Jacq.) T.S.Yi, A.J.Mill. & J.Wen	5	Least concern	0	0	0	0	0	0	0	0	0	0	0	0	0	0	0	0	0	0	0	0	0	1	0	0	0	0	0	0	0	0	0	0	0	0	0	0	0	0	1	0	0	0	0	0
Gentianales	Apocynaceae	Secamone alpini	Schult.	2	Not assessed	0	0	0	0	0	0	0	0	0	0	0	0	0	0	0	0	0	0	0	0	1	1	0	0	0	0	0	0	0	0	0	0	0	0	0	0	0	0	1	0	0	0	0	0
Fabales	Polygalaceae	Securidaca longipedunculata	Fresen.	2	Not assessed	0	0	0	0	0	0	0	0	0	0	0	0	0	0	0	0	0	0	0	1	1	1	0	0	0	0	0	0	0	0	0	0	0	0	0	0	0	0	0	0	0	0	0	0
Apiales	Araliaceae	Seemannaralia gerrardii	(Seem.) R.Vig.	2	Not assessed	0	0	0	0	0	0	0	0	0	0	0	0	0	0	0	0	0	0	0	0	0	1	0	0	0	0	0	0	0	0	0	0	0	0	0	0	0	0	0	0	0	0	0	0
Sapindales	Anacardiaceae	Semecarpus anacardium	L.f.	1	Not assessed	0	0	0	0	0	0	0	0	0	0	0	0	0	0	0	0	0	0	0	0	0	0	0	0	1	0	0	0	0	0	0	0	0	0	0	0	0	0	0	0	0	0	0	0
Fabales	Fabaceae	Senegalia ataxacantha	(DC.) Kyal. & Boatwr.	5	Least concern	0	0	0	0	0	0	0	0	0	0	0	0	0	0	0	0	0	0	0	1	1	1	0	0	0	0	0	0	0	0	0	0	0	0	0	0	0	0	0	0	0	0	0	0
Fabales	Fabaceae	Senegalia burkei	(Benth.) Kyal. & Boatwr.	7	Least concern	0	0	0	0	1	0	0	0	0	0	0	0	0	0	0	0	0	0	0	0	0	1	0	0	0	0	0	0	0	0	0	0	0	0	0	0	0	0	0	0	0	0	0	0
Fabales	Fabaceae	Senegalia caffra	(Thunb.) P.J.H. Hurter & Mabb.	18	Least concern	0	0	0	0	0	0	0	0	0	0	0	0	0	0	0	0	0	0	0	0	1	1	0	0	0	0	0	0	0	0	0	0	0	0	0	0	0	0	0	0	0	0	0	0
Fabales	Fabaceae	Senegalia erubescens	(Welw. ex Oliv.) Kyal. & Boatwr.	1	Least concern	0	0	0	0	0	0	0	0	0	0	0	0	0	0	0	0	0	0	0	1	1	1	0	0	0	0	0	0	0	0	0	0	0	0	0	0	0	0	0	0	0	0	0	0
Fabales	Fabaceae	Senegalia galpinii	(Burt Davy) Seigler & Ebinger	16	Least concern	0	0	0	0	1	0	0	0	0	0	0	0	0	0	0	0	0	0	0	0	1	1	0	0	0	0	0	0	0	0	0	0	0	0	0	0	0	0	0	0	0	0	0	0
Fabales	Fabaceae	Senegalia hereroensis	(Engl.) Kyal. & Boatwr.	3	Least concern	0	0	0	0	0	0	0	0	0	0	0	0	0	0	0	0	0	0	0	0	0	1	0	0	0	0	0	0	0	0	0	0	0	0	0	0	0	0	0	0	0	0	0	0
Fabales	Fabaceae	Senegalia mellifera	(Vahl) Seigler & Ebinger	3	Least concern	0	0	0	0	0	0	0	0	0	0	0	0	0	0	0	0	1	1	1	0	1	1	0	0	0	0	0	0	0	0	0	0	0	0	0	0	0	0	0	0	0	0	0	0
Fabales	Fabaceae	Senegalia montis-usti	(Merxm. & A.Schreib.) Kyal. & Boatwr.	1	Near threatened	0	0	0	0	0	0	0	0	0	0	0	0	0	0	0	0	0	0	0	0	0	1	0	0	0	0	0	0	0	0	0	0	0	0	0	0	0	0	0	0	0	0	0	0
Fabales	Fabaceae	Senegalia nigrescens	(Oliv.) P.J.H. Hurter	12	Not assessed	0	0	0	0	0	0	0	0	0	0	0	0	0	0	0	0	0	0	0	0	1	1	0	0	0	0	0	0	0	0	0	0	0	0	0	0	0	0	0	0	0	0	0	0
Fabales	Fabaceae	Senegalia polyacantha	(Willd.) Seigler & Ebinger	4	Not assessed	0	0	1	0	0	0	0	0	0	0	0	0	0	0	0	0	0	1	0	0	1	1	0	0	0	0	0	0	0	0	0	0	0	0	0	0	0	0	0	0	0	0	0	0
Fabales	Fabaceae	Senegalia polyacantha subsp. campylacantha	(Hochst. ex A.Rich.) Kyal. & Boatwr.	2	Not assessed	0	0	0	0	0	0	0	0	0	0	0	0	0	0	0	0	0	1	1	1	1	1	0	0	0	0	0	0	0	0	0	0	0	0	0	0	0	0	0	0	0	0	0	0
Fabales	Fabaceae	Senegalia welwitschii subsp. delagoensis	(Harms ex Burtt Davy) Kyal. & Boatwr.	1	Not assessed	0	0	0	0	0	0	0	0	0	0	0	0	0	0	0	0	0	0	0	0	1	1	0	0	0	0	0	0	0	0	0	0	0	0	0	0	0	0	0	0	0	0	0	0
[truncated: 311 more rows]
[truncated: 3 more columns]

## Sheet: Table S4 Metadata
Field name	Description
Order	Order to which the taxon is classified following Tropicos org (2022)
Family	Botanical family of the taxon, following Tropicos org (2022)
Taxon	Species name of the taxon
Authority citation	Author abbreviation of the binomial epithet
# Arboreta	The number of arboreta in which the taxon was recorded
IUCN category	The IUCN red list category of the taxon
SAPIA	Has the taxon been recorded on the Southern African Plant Invader Atlas (2020)? 1 = yes, 0 = no
WEBER	Has the taxon been recorded by Weber (2001)? 1 = yes, 0 = no
Rejmanek Richardson	Has the taxon been recorded by Rejmanek & Richardson (2013)? 1 = yes, 0 = no
GISD	Has the taxon been recorded by the Global Invasive Species Database (2022)? 1 = yes, 0 = no
PSHB host	Has the taxon been recorded to be a host tree for PSHB? 1 = yes, 0 = no
PSHB Reproductive host	Has the taxon been recorded to be a reproductive host for PSHB? 1 = yes, 0 = no
Arctic and subartic	Does the taxon's natural distribution include this biogeographic region? 1 = yes, 0 = no
Euro Siberian Europe	Does the taxon's natural distribution include this biogeographic region? 1 = yes, 0 = no
Euro Siberian Asia	Does the taxon's natural distribution include this biogeographic region? 1 = yes, 0 = no
Sino Japanese	Does the taxon's natural distribution include this biogeographic region? 1 = yes, 0 = no
WC Asiatic	Does the taxon's natural distribution include this biogeographic region? 1 = yes, 0 = no
Mediterranean	Does the taxon's natural distribution include this biogeographic region? 1 = yes, 0 = no
Macaronesian	Does the taxon's natural distribution include this biogeographic region? 1 = yes, 0 = no
Atlantic N American northern	Does the taxon's natural distribution include this biogeographic region? 1 = yes, 0 = no
Atlantic N American southern	Does the taxon's natural distribution include this biogeographic region? 1 = yes, 0 = no
Pacific North American	Does the taxon's natural distribution include this biogeographic region? 1 = yes, 0 = no
African Indian desert	Does the taxon's natural distribution include this biogeographic region? 1 = yes, 0 = no
Sudanese Park Steppe	Does the taxon's natural distribution include this biogeographic region? 1 = yes, 0 = no
NE African Highland	Does the taxon's natural distribution include this biogeographic region? 1 = yes, 0 = no
West African rainforest	Does the taxon's natural distribution include this biogeographic region? 1 = yes, 0 = no
East African Steppe	Does the taxon's natural distribution include this biogeographic region? 1 = yes, 0 = no
South African	Does the taxon's natural distribution include this biogeographic region? 1 = yes, 0 = no
Madagascar	Does the taxon's natural distribution include this biogeographic region? 1 = yes, 0 = no
Ascension and St Helena	Does the taxon's natural distribution include this biogeographic region? 1 = yes, 0 = no
Indian	Does the taxon's natural distribution include this biogeographic region? 1 = yes, 0 = no
Continental SE Asiatic	Does the taxon's natural distribution include this biogeographic region? 1 = yes, 0 = no
Malaysian	Does the taxon's natural distribution include this biogeographic region? 1 = yes, 0 = no
Hawaiian	Does the taxon's natural distribution include this biogeographic region? 1 = yes, 0 = no
New Caledonia	Does the taxon's natural distribution include this biogeographic region? 1 = yes, 0 = no
Melanesia and Micronesia	Does the taxon's natural distribution include this biogeographic region? 1 = yes, 0 = no
Polynesia	Does the taxon's natural distribution include this biogeographic region? 1 = yes, 0 = no
Caribbean	Does the taxon's natural distribution include this biogeographic region? 1 = yes, 0 = no
Venezuela and Guiana	Does the taxon's natural distribution include this biogeographic region? 1 = yes, 0 = no
Amazon	Does the taxon's natural distribution include this biogeographic region? 1 = yes, 0 = no
South Brazilian	Does the taxon's natural distribution include this biogeographic region? 1 = yes, 0 = no
Andean	Does the taxon's natural distribution include this biogeographic region? 1 = yes, 0 = no
Pampas	Does the taxon's natural distribution include this biogeographic region? 1 = yes, 0 = no
Juan Fernandez	Does the taxon's natural distribution include this biogeographic region? 1 = yes, 0 = no
Cape	Does the taxon's natural distribution include this biogeographic region? 1 = yes, 0 = no
NE Australian	Does the taxon's natural distribution include this biogeographic region? 1 = yes, 0 = no
SW Australian	Does the taxon's natural distribution include this biogeographic region? 1 = yes, 0 = no
C Australian	Does the taxon's natural distribution include this biogeographic region? 1 = yes, 0 = no
New Zealand	Does the taxon's natural distribution include this biogeographic region? 1 = yes, 0 = no
Patagonian	Does the taxon's natural distribution include this biogeographic region? 1 = yes, 0 = no
S Temperate Oceanic islands	Does the taxon's natural distribution include this biogeographic region? 1 = yes, 0 = no
Garden origin	Is the taxon a cultigen? 1 = yes, 0 = no
